# Supplementary material for: Synthetic antibody-derived immunopeptide provides neuroprotection in glaucoma through molecular interaction with retinal protein histone H3.1
Source: Front Med (Lausanne). 2022 Oct 14;9:993351. doi: 10.3389/fmed.2022.993351 (PMC9613933; doi:10.3389/fmed.2022.993351)
Supplement: Supplementary Material 2 — Mass spectrometry (MS) identification of proteins in complementary-determining region 2 (CDR2)-treated and untreated explants as well as statistical analysis of the proteins significantly altered between both groups. [file Table_2.XLSX]

## Sheet: CTRL explants vs. CDR2
Major protein ID	Protein IDs	Majority protein IDs	Peptide counts (all)	Peptide counts (razor+unique)	Peptide counts (unique)	Fasta headers	Protein name	Gene name	Taxonomy	Number of proteins	Peptides	Razor + unique peptides	Unique peptides	Peptides CTRL_R1	Peptides CTRL_R2	Peptides CTRL_R3	Peptides P1_TRE_R1	Peptides P1_TRE_R2	Peptides P1_TRE_R3	Razor + unique peptides CTRL_R1	Razor + unique peptides CTRL_R2	Razor + unique peptides CTRL_R3	Razor + unique peptides P1_TRE_R1	Razor + unique peptides P1_TRE_R2	Razor + unique peptides P1_TRE_R3	Unique peptides CTRL_R1	Unique peptides CTRL_R2	Unique peptides CTRL_R3	Unique peptides P1_TRE_R1	Unique peptides P1_TRE_R2	Unique peptides P1_TRE_R3	Sequence coverage [%]	Unique + razor sequence coverage [%]	Unique sequence coverage [%]	Mol. weight [kDa]	Sequence length	Sequence lengths	Fraction average	Fraction 1	Fraction 2	Fraction 3	Fraction 4	Fraction 5	Fraction 6	Q-value	Score	Identification type CTRL_R1	Identification type CTRL_R2	Identification type CTRL_R3
Q04446	sp|Q04446|GLGB_HUMAN	sp|Q04446|GLGB_HUMAN	2	2	2	sp|Q04446|GLGB_HUMAN 1,4-alpha-glucan-branching enzyme OS=Homo sapiens OX=9606 GN=GBE1 PE=1 SV=3	1,4-alpha-glucan-branching enzyme	GBE1	Homo sapiens	1	2	2	2	2	2	2	2	2	2	2	2	2	2	2	2	2	2	2	2	2	2	2022-04-03	2022-04-03	2022-04-03	80.473	702	702	2022-05-03	2	2	2	2	2	2	0	14.294	By MS/MS	By MS/MS	By MS/MS
P61604	sp|P61604|CH10_HUMAN	sp|P61604|CH10_HUMAN	3	3	3	sp|P61604|CH10_HUMAN 10 kDa heat shock protein, mitochondrial OS=Homo sapiens OX=9606 GN=HSPE1 PE=1 SV=2	10 kDa heat shock protein, mitochondrial	HSPE1	Homo sapiens	1	3	3	3	3	3	3	3	3	3	3	3	3	3	3	3	3	3	3	3	3	3	35.3	35.3	35.3	10.932	102	102	2022-05-03	4	4	4	4	4	4	0	37.852	By MS/MS	By MS/MS	By MS/MS
P59083	sp|P59083|PHP14_PIG	sp|P59083|PHP14_PIG	2	2	2	sp|P59083|PHP14_PIG 14 kDa phosphohistidine phosphatase OS=Sus scrofa OX=9823 GN=PHPT1 PE=1 SV=2	14 kDa phosphohistidine phosphatase	PHPT1	Sus scrofa	1	2	2	2	1	1	1	1	2	1	1	1	1	1	2	1	1	1	1	1	2	1	2022-06-20	2022-06-20	2022-06-20	13.931	126	126	1971-03-01	1	1	1	1	2	1	0	13.478	By MS/MS	By matching	By matching
P31946	sp|P31946|1433B_HUMAN	sp|P31946|1433B_HUMAN	8	5	5	sp|P31946|1433B_HUMAN 14-3-3 protein beta/alpha OS=Homo sapiens OX=9606 GN=YWHAB PE=1 SV=3	14-3-3 protein beta/alpha	YWHAB	Homo sapiens	1	8	5	5	8	8	8	8	8	7	5	5	5	5	5	5	5	5	5	5	5	5	41.5	2022-05-30	2022-05-30	28.082	246	246	1956-03-01	8	9	10	9	10	9	0	323.31	By MS/MS	By MS/MS	By MS/MS
P62258	sp|P62258|1433E_HUMAN	sp|P62258|1433E_HUMAN	14	14	12	sp|P62258|1433E_HUMAN 14-3-3 protein epsilon OS=Homo sapiens OX=9606 GN=YWHAE PE=1 SV=1	14-3-3 protein epsilon	YWHAE	Homo sapiens	1	14	14	12	13	13	13	14	14	13	13	13	13	14	14	13	11	11	11	12	12	11	63.5	63.5	56.5	29.174	255	255	1946-03-01	22	24	25	27	23	20	0	323.31	By MS/MS	By MS/MS	By MS/MS
Q04917	sp|Q04917|1433F_HUMAN	sp|Q04917|1433F_HUMAN	9	7	7	sp|Q04917|1433F_HUMAN 14-3-3 protein eta OS=Homo sapiens OX=9606 GN=YWHAH PE=1 SV=4	14-3-3 protein eta	YWHAH	Homo sapiens	1	9	7	7	9	9	9	9	8	8	7	7	7	7	6	6	7	7	7	7	6	6	37.8	2022-05-30	2022-05-30	28.218	246	246	1943-03-01	8	10	9	8	8	8	0	156.75	By MS/MS	By MS/MS	By MS/MS
P61981	sp|P61981|1433G_HUMAN	sp|P61981|1433G_HUMAN	7	5	5	sp|P61981|1433G_HUMAN 14-3-3 protein gamma OS=Homo sapiens OX=9606 GN=YWHAG PE=1 SV=2	14-3-3 protein gamma	YWHAG	Homo sapiens	1	7	5	5	6	7	7	7	6	6	4	5	5	5	4	4	4	5	5	5	4	4	35.6	2022-03-28	2022-03-28	28.302	247	247	1945-03-01	5	6	6	6	5	5	0	323.31	By MS/MS	By MS/MS	By MS/MS
P27348	sp|P27348|1433T_HUMAN	sp|P27348|1433T_HUMAN	11	8	8	sp|P27348|1433T_HUMAN 14-3-3 protein theta OS=Homo sapiens OX=9606 GN=YWHAQ PE=1 SV=1	14-3-3 protein theta	YWHAQ	Homo sapiens	1	11	8	8	11	11	11	11	11	10	8	8	8	8	8	8	8	8	8	8	8	8	46.5	35.5	35.5	27.764	245	245	1946-03-01	10	11	11	9	10	10	0	323.31	By MS/MS	By MS/MS	By MS/MS
P63104	sp|P63104|1433Z_HUMAN	sp|P63104|1433Z_HUMAN	14	12	11	sp|P63104|1433Z_HUMAN 14-3-3 protein zeta/delta OS=Homo sapiens OX=9606 GN=YWHAZ PE=1 SV=1	14-3-3 protein zeta/delta	YWHAZ	Homo sapiens	1	14	12	11	12	13	13	13	13	13	10	11	11	11	11	11	9	10	10	10	10	11	57.1	49.8	46.1	27.745	245	245	1957-03-01	14	15	15	14	16	16	0	323.31	By MS/MS	By MS/MS	By MS/MS
Q9NRZ7	sp|Q9NRZ7|PLCC_HUMAN	sp|Q9NRZ7|PLCC_HUMAN	1	1	1	sp|Q9NRZ7|PLCC_HUMAN 1-acyl-sn-glycerol-3-phosphate acyltransferase gamma OS=Homo sapiens OX=9606 GN=AGPAT3 PE=1 SV=1	1-acyl-sn-glycerol-3-phosphate acyltransferase gamma	AGPAT3	Homo sapiens	1	1	1	1	1	1	1	1	1	1	1	1	1	1	1	1	1	1	1	1	1	1	2022-09-02	2022-09-02	2022-09-02	43.38	376	376	2022-05-03	1	1	1	1	1	1	0.0024722	90.045	By MS/MS	By MS/MS	By MS/MS
Q9NQ66	sp|Q9NQ66|PLCB1_HUMAN	sp|Q9NQ66|PLCB1_HUMAN	1	1	1	sp|Q9NQ66|PLCB1_HUMAN 1-phosphatidylinositol 4,5-bisphosphate phosphodiesterase beta-1 OS=Homo sapiens OX=9606 GN=PLCB1 PE=1 SV=1	1-phosphatidylinositol 4,5-bisphosphate phosphodiesterase beta-1	PLCB1	Homo sapiens	1	1	1	1	1	1	1	1	1	1	1	1	1	1	1	1	1	1	1	1	1	1	2022-08-01	2022-08-01	2022-08-01	138.57	1216	1216	2022-05-03	1	1	1	1	1	1	0.0023068	75.058	By MS/MS	By MS/MS	By MS/MS
Q99460	sp|Q99460|PSMD1_HUMAN	sp|Q99460|PSMD1_HUMAN	2	2	2	sp|Q99460|PSMD1_HUMAN 26S proteasome non-ATPase regulatory subunit 1 OS=Homo sapiens OX=9606 GN=PSMD1 PE=1 SV=2	26S proteasome non-ATPase regulatory subunit 1	PSMD1	Homo sapiens	1	2	2	2	2	1	1	1	1	1	2	1	1	1	1	1	2	1	1	1	1	1	2022-06-03	2022-06-03	2022-06-03	105.84	953	953	2014-03-01	2	1	1	1	1	1	0	14.527	By MS/MS	By matching	By MS/MS
O00231	sp|O00231|PSD11_HUMAN	sp|O00231|PSD11_HUMAN	2	2	2	sp|O00231|PSD11_HUMAN 26S proteasome non-ATPase regulatory subunit 11 OS=Homo sapiens OX=9606 GN=PSMD11 PE=1 SV=3	26S proteasome non-ATPase regulatory subunit 11	PSMD11	Homo sapiens	1	2	2	2	2	2	2	2	2	2	2	2	2	2	2	2	2	2	2	2	2	2	2022-09-05	2022-09-05	2022-09-05	47.463	422	422	1937-03-01	4	3	3	3	3	3	0	12.779	By MS/MS	By MS/MS	By MS/MS
Q13200	sp|Q13200|PSMD2_HUMAN	sp|Q13200|PSMD2_HUMAN	2	2	2	sp|Q13200|PSMD2_HUMAN 26S proteasome non-ATPase regulatory subunit 2 OS=Homo sapiens OX=9606 GN=PSMD2 PE=1 SV=3	26S proteasome non-ATPase regulatory subunit 2	PSMD2	Homo sapiens	1	2	2	2	2	2	2	2	2	2	2	2	2	2	2	2	2	2	2	2	2	2	3	3	3	100.2	908	908	2022-05-03	2	2	2	2	2	2	0	12.551	By MS/MS	By matching	By MS/MS
O43242	sp|O43242|PSMD3_HUMAN	sp|O43242|PSMD3_HUMAN	2	2	2	sp|O43242|PSMD3_HUMAN 26S proteasome non-ATPase regulatory subunit 3 OS=Homo sapiens OX=9606 GN=PSMD3 PE=1 SV=2	26S proteasome non-ATPase regulatory subunit 3	PSMD3	Homo sapiens	1	2	2	2	2	2	2	1	2	2	2	2	2	1	2	2	2	2	2	1	2	2	2022-09-04	2022-09-04	2022-09-04	60.977	534	534	1946-03-01	2	2	3	2	2	2	0	16.569	By MS/MS	By MS/MS	By MS/MS
Q15008	sp|Q15008|PSMD6_HUMAN	sp|Q15008|PSMD6_HUMAN	2	2	2	sp|Q15008|PSMD6_HUMAN 26S proteasome non-ATPase regulatory subunit 6 OS=Homo sapiens OX=9606 GN=PSMD6 PE=1 SV=1	26S proteasome non-ATPase regulatory subunit 6	PSMD6	Homo sapiens	1	2	2	2	1	2	1	1	1	1	1	2	1	1	1	1	1	2	1	1	1	1	2022-09-05	2022-09-05	2022-09-05	45.531	389	389	2029-03-01	1	2	1	1	1	1	0	16.377	By MS/MS	By MS/MS	By MS/MS
P51665	sp|P51665|PSMD7_HUMAN	sp|P51665|PSMD7_HUMAN	3	3	3	sp|P51665|PSMD7_HUMAN 26S proteasome non-ATPase regulatory subunit 7 OS=Homo sapiens OX=9606 GN=PSMD7 PE=1 SV=2	26S proteasome non-ATPase regulatory subunit 7	PSMD7	Homo sapiens	1	3	3	3	3	3	2	0	1	1	3	3	2	0	1	1	3	3	2	0	1	1	2022-04-16	2022-04-16	2022-04-16	37.025	324	324	2022-06-02	3	3	2		1	1	0	17.613	By MS/MS	By matching	By MS/MS
P62333	sp|P62333|PRS10_HUMAN	sp|P62333|PRS10_HUMAN	3	3	3	sp|P62333|PRS10_HUMAN 26S proteasome regulatory subunit 10B OS=Homo sapiens OX=9606 GN=PSMC6 PE=1 SV=1	26S proteasome regulatory subunit 10B	PSMC6	Homo sapiens	1	3	3	3	2	2	2	1	3	3	2	2	2	1	3	3	2	2	2	1	3	3	2022-01-14	2022-01-14	2022-01-14	44.172	389	389	1977-03-01	2	2	2	1	3	3	0	18.954	By MS/MS	By MS/MS	By MS/MS
P62191	sp|P62191|PRS4_HUMAN	sp|P62191|PRS4_HUMAN	2	2	2	sp|P62191|PRS4_HUMAN 26S proteasome regulatory subunit 4 OS=Homo sapiens OX=9606 GN=PSMC1 PE=1 SV=1	26S proteasome regulatory subunit 4	PSMC1	Homo sapiens	1	2	2	2	2	2	2	2	2	2	2	2	2	2	2	2	2	2	2	2	2	2	2022-03-09	2022-03-09	2022-03-09	49.184	440	440	2022-05-03	2	2	2	2	2	2	0	16.865	By MS/MS	By MS/MS	By MS/MS
P17980	sp|P17980|PRS6A_HUMAN	sp|P17980|PRS6A_HUMAN	3	3	3	sp|P17980|PRS6A_HUMAN 26S proteasome regulatory subunit 6A OS=Homo sapiens OX=9606 GN=PSMC3 PE=1 SV=3	26S proteasome regulatory subunit 6A	PSMC3	Homo sapiens	1	3	3	3	3	2	3	2	2	2	3	2	3	2	2	2	3	2	3	2	2	2	2022-03-10	2022-03-10	2022-03-10	49.203	439	439	2029-03-01	3	2	3	2	2	2	0	20.87	By MS/MS	By MS/MS	By MS/MS
P35998	sp|P35998|PRS7_HUMAN	sp|P35998|PRS7_HUMAN	1	1	1	sp|P35998|PRS7_HUMAN 26S proteasome regulatory subunit 7 OS=Homo sapiens OX=9606 GN=PSMC2 PE=1 SV=3	26S proteasome regulatory subunit 7	PSMC2	Homo sapiens	1	1	1	1	1	1	1	1	1	1	1	1	1	1	1	1	1	1	1	1	1	1	3	3	3	48.633	433	433	2022-05-03	1	1	1	1	1	1	0.0024096	82.157	By MS/MS	By MS/MS	By MS/MS
P62197	sp|P62197|PRS8_PIG;sp|P62195|PRS8_HUMAN	sp|P62197|PRS8_PIG;sp|P62195|PRS8_HUMAN	4;4	4;4	4;4	sp|P62197|PRS8_PIG 26S proteasome regulatory subunit 8 OS=Sus scrofa OX=9823 GN=PSMC5 PE=2 SV=1;sp|P62195|PRS8_HUMAN 26S proteasome regulatory subunit 8 OS=Homo sapiens OX=9606 GN=PSMC5 PE=1 SV=1	26S proteasome regulatory subunit 8	PSMC5	Sus scrofa	2	4	4	4	4	3	4	3	2	2	4	3	4	3	2	2	4	3	4	3	2	2	2022-03-13	2022-03-13	2022-03-13	45.626	406	406;406	2022-11-03	4	3	4	3	2	2	0	26.335	By MS/MS	By MS/MS	By MS/MS
Q13442	sp|Q13442|HAP28_HUMAN	sp|Q13442|HAP28_HUMAN	2	2	2	sp|Q13442|HAP28_HUMAN 28 kDa heat- and acid-stable phosphoprotein OS=Homo sapiens OX=9606 GN=PDAP1 PE=1 SV=1	28 kDa heat- and acid-stable phosphoprotein	PDAP1	Homo sapiens	1	2	2	2	1	2	2	2	2	2	1	2	2	2	2	2	1	2	2	2	2	2	2022-06-16	2022-06-16	2022-06-16	20.63	181	181	1967-03-01	1	2	3	2	2	2	0	13.514	By matching	By MS/MS	By MS/MS
P52758	sp|P52758|RIDA_HUMAN	sp|P52758|RIDA_HUMAN	1	1	1	sp|P52758|RIDA_HUMAN 2-iminobutanoate/2-iminopropanoate deaminase OS=Homo sapiens OX=9606 GN=RIDA PE=1 SV=1	2-iminobutanoate/2-iminopropanoate deaminase	RIDA	Homo sapiens	1	1	1	1	1	1	1	1	1	1	1	1	1	1	1	1	1	1	1	1	1	1	8	8	8	14.494	137	137	2022-05-03	1	1	1	1	1	1	0.0023015	74.693	By MS/MS	By MS/MS	By MS/MS
Q02218	sp|Q02218|ODO1_HUMAN;sp|Q9ULD0|OGDHL_HUMAN	sp|Q02218|ODO1_HUMAN	9;2	9;2	9;2	sp|Q02218|ODO1_HUMAN 2-oxoglutarate dehydrogenase, mitochondrial OS=Homo sapiens OX=9606 GN=OGDH PE=1 SV=3	2-oxoglutarate dehydrogenase, mitochondrial	OGDH	Homo sapiens	2	9	9	9	9	9	9	9	9	9	9	9	9	9	9	9	9	9	9	9	9	9	2022-05-14	2022-05-14	2022-05-14	115.93	1023	1023;1010	2022-05-03	10	10	10	10	10	10	0	61.233	By MS/MS	By MS/MS	By MS/MS
P46783	sp|P46783|RS10_HUMAN;sp|Q9NQ39|RS10L_HUMAN	sp|P46783|RS10_HUMAN;sp|Q9NQ39|RS10L_HUMAN	1;1	1;1	1;1	sp|P46783|RS10_HUMAN 40S ribosomal protein S10 OS=Homo sapiens OX=9606 GN=RPS10 PE=1 SV=1;sp|Q9NQ39|RS10L_HUMAN Putative 40S ribosomal protein S10-like OS=Homo sapiens OX=9606 GN=RPS10P5 PE=5 SV=1	40S ribosomal protein S10	RPS10	Homo sapiens	2	1	1	1	1	1	0	0	0	0	1	1	0	0	0	0	1	1	0	0	0	0	2022-05-08	2022-05-08	2022-05-08	18.898	165	165;176	2022-05-01	1	1					0.007431	65.997	By MS/MS	By MS/MS
P46405	sp|P46405|RS12_PIG;sp|P25398|RS12_HUMAN	sp|P46405|RS12_PIG;sp|P25398|RS12_HUMAN	1;1	1;1	1;1	sp|P46405|RS12_PIG 40S ribosomal protein S12 OS=Sus scrofa OX=9823 GN=RPS12 PE=1 SV=2;sp|P25398|RS12_HUMAN 40S ribosomal protein S12 OS=Homo sapiens OX=9606 GN=RPS12 PE=1 SV=3	40S ribosomal protein S12	RPS12	Sus scrofa	2	1	1	1	1	1	1	1	1	1	1	1	1	1	1	1	1	1	1	1	1	1	2022-04-11	2022-04-11	2022-04-11	14.515	132	132;132	2022-05-03	1	1	1	1	1	1	0.002448	85.654	By MS/MS	By MS/MS	By MS/MS
P62263	sp|P62263|RS14_HUMAN	sp|P62263|RS14_HUMAN	2	2	2	sp|P62263|RS14_HUMAN 40S ribosomal protein S14 OS=Homo sapiens OX=9606 GN=RPS14 PE=1 SV=3	40S ribosomal protein S14	RPS14	Homo sapiens	1	2	2	2	2	2	2	2	2	2	2	2	2	2	2	2	2	2	2	2	2	2	2022-09-15	2022-09-15	2022-09-15	16.273	151	151	2022-05-03	2	2	2	2	2	2	0	13.092	By MS/MS	By MS/MS	By MS/MS
P62244	sp|P62244|RS15A_HUMAN	sp|P62244|RS15A_HUMAN	1	1	1	sp|P62244|RS15A_HUMAN 40S ribosomal protein S15a OS=Homo sapiens OX=9606 GN=RPS15A PE=1 SV=2	40S ribosomal protein S15a	RPS15A	Homo sapiens	1	1	1	1	1	1	1	1	1	1	1	1	1	1	1	1	1	1	1	1	1	1	2022-08-10	2022-08-10	2022-08-10	14.839	130	130	2029-03-01	1	2	1	1	1	1	0	18.963	By MS/MS	By MS/MS	By MS/MS
Q29201	sp|Q29201|RS16_PIG;sp|P62249|RS16_HUMAN	sp|Q29201|RS16_PIG;sp|P62249|RS16_HUMAN	1;1	1;1	1;1	sp|Q29201|RS16_PIG 40S ribosomal protein S16 OS=Sus scrofa OX=9823 GN=RPS16 PE=1 SV=4;sp|P62249|RS16_HUMAN 40S ribosomal protein S16 OS=Homo sapiens OX=9606 GN=RPS16 PE=1 SV=2	40S ribosomal protein S16	RPS16	Sus scrofa	2	1	1	1	1	1	1	1	1	1	1	1	1	1	1	1	1	1	1	1	1	1	2022-05-07	2022-05-07	2022-05-07	16.445	146	146;146	2022-05-03	1	1	1	1	1	1	0.0023121	75.369	By MS/MS	By MS/MS	By MS/MS
Q6QAP7	sp|Q6QAP7|RS17_PIG;sp|P08708|RS17_HUMAN	sp|Q6QAP7|RS17_PIG;sp|P08708|RS17_HUMAN	2;2	2;2	2;2	sp|Q6QAP7|RS17_PIG 40S ribosomal protein S17 OS=Sus scrofa OX=9823 GN=RPS17 PE=1 SV=3;sp|P08708|RS17_HUMAN 40S ribosomal protein S17 OS=Homo sapiens OX=9606 GN=RPS17 PE=1 SV=2	40S ribosomal protein S17	RPS17	Sus scrofa	2	2	2	2	2	2	2	2	1	2	2	2	2	2	1	2	2	2	2	2	1	2	2022-04-24	2022-04-24	2022-04-24	15.524	135	135;135	1936-03-01	2	2	2	2	1	2	0	12.321	By MS/MS	By MS/MS	By MS/MS
P62272	sp|P62272|RS18_PIG;sp|P62269|RS18_HUMAN	sp|P62272|RS18_PIG;sp|P62269|RS18_HUMAN	4;4	4;4	4;4	sp|P62272|RS18_PIG 40S ribosomal protein S18 OS=Sus scrofa OX=9823 GN=RPS18 PE=1 SV=3;sp|P62269|RS18_HUMAN 40S ribosomal protein S18 OS=Homo sapiens OX=9606 GN=RPS18 PE=1 SV=3	40S ribosomal protein S18	RPS18	Sus scrofa	2	4	4	4	3	3	3	4	4	3	3	3	3	4	4	3	3	3	3	4	4	3	25	25	25	17.718	152	152;152	2022-06-03	3	3	3	4	4	3	0	27.899	By MS/MS	By MS/MS	By MS/MS
P15880	sp|P15880|RS2_HUMAN	sp|P15880|RS2_HUMAN	3	3	3	sp|P15880|RS2_HUMAN 40S ribosomal protein S2 OS=Homo sapiens OX=9606 GN=RPS2 PE=1 SV=2	40S ribosomal protein S2	RPS2	Homo sapiens	1	3	3	3	2	3	3	3	3	3	2	3	3	3	3	3	2	3	3	3	3	3	2022-03-12	2022-03-12	2022-03-12	31.324	293	293	1965-03-01	2	3	3	3	3	3	0	17.339	By MS/MS	By MS/MS	By MS/MS
P60866	sp|P60866|RS20_HUMAN;sp|A1XQU9|RS20_PIG	sp|P60866|RS20_HUMAN;sp|A1XQU9|RS20_PIG	2;2	2;2	2;2	sp|P60866|RS20_HUMAN 40S ribosomal protein S20 OS=Homo sapiens OX=9606 GN=RPS20 PE=1 SV=1;sp|A1XQU9|RS20_PIG 40S ribosomal protein S20 OS=Sus scrofa OX=9823 GN=RPS20 PE=1 SV=1	40S ribosomal protein S20	RPS20	Homo sapiens	2	2	2	2	2	2	2	2	2	2	2	2	2	2	2	2	2	2	2	2	2	2	2022-03-19	2022-03-19	2022-03-19	13.373	119	119;119	2022-05-03	2	2	2	2	2	2	0	12.396	By MS/MS	By MS/MS	By MS/MS
Q6QAT1	sp|Q6QAT1|RS28_PIG;sp|P62857|RS28_HUMAN	sp|Q6QAT1|RS28_PIG;sp|P62857|RS28_HUMAN	2;2	2;2	2;2	sp|Q6QAT1|RS28_PIG 40S ribosomal protein S28 OS=Sus scrofa OX=9823 GN=RPS28 PE=1 SV=2;sp|P62857|RS28_HUMAN 40S ribosomal protein S28 OS=Homo sapiens OX=9606 GN=RPS28 PE=1 SV=1	40S ribosomal protein S28	RPS28	Sus scrofa	2	2	2	2	0	0	0	1	0	1	0	0	0	1	0	1	0	0	0	1	0	1	33.3	33.3	33.3	78.409	69	69;69	5				1		1	0.0025608	1996-10-01
Q0Z8U2	sp|Q0Z8U2|RS3_PIG;sp|P23396|RS3_HUMAN	sp|Q0Z8U2|RS3_PIG;sp|P23396|RS3_HUMAN	6;6	6;6	6;6	sp|Q0Z8U2|RS3_PIG 40S ribosomal protein S3 OS=Sus scrofa OX=9823 GN=RPS3 PE=1 SV=1;sp|P23396|RS3_HUMAN 40S ribosomal protein S3 OS=Homo sapiens OX=9606 GN=RPS3 PE=1 SV=2	40S ribosomal protein S3	RPS3	Sus scrofa	2	6	6	6	6	6	5	6	6	6	6	6	5	6	6	6	6	6	5	6	6	6	37.4	37.4	37.4	26.688	243	243;243	1951-03-01	6	6	5	6	6	6	0	42.292	By MS/MS	By MS/MS	By MS/MS
P61247	sp|P61247|RS3A_HUMAN	sp|P61247|RS3A_HUMAN	3	3	3	sp|P61247|RS3A_HUMAN 40S ribosomal protein S3a OS=Homo sapiens OX=9606 GN=RPS3A PE=1 SV=2	40S ribosomal protein S3a	RPS3A	Homo sapiens	1	3	3	3	2	2	2	2	2	2	2	2	2	2	2	2	2	2	2	2	2	2	2022-03-16	2022-03-16	2022-03-16	29.945	264	264	2022-05-03	2	2	2	2	2	2	0	18.658	By MS/MS	By MS/MS	By MS/MS
P62701	sp|P62701|RS4X_HUMAN	sp|P62701|RS4X_HUMAN	3	3	3	sp|P62701|RS4X_HUMAN 40S ribosomal protein S4, X isoform OS=Homo sapiens OX=9606 GN=RPS4X PE=1 SV=2	40S ribosomal protein S4, X isoform	RPS4X	Homo sapiens	1	3	3	3	3	2	2	1	1	2	3	2	2	1	1	2	3	2	2	1	1	2	2022-09-17	2022-09-17	2022-09-17	29.597	263	263	2022-09-03	3	2	2	1	1	2	0	18.833	By MS/MS	By MS/MS	By MS/MS
P46782	sp|P46782|RS5_HUMAN	sp|P46782|RS5_HUMAN	2	2	2	sp|P46782|RS5_HUMAN 40S ribosomal protein S5 OS=Homo sapiens OX=9606 GN=RPS5 PE=1 SV=4	40S ribosomal protein S5	RPS5	Homo sapiens	1	2	2	2	2	2	2	2	1	2	2	2	2	2	1	2	2	2	2	2	1	2	2022-02-17	2022-02-17	2022-02-17	22.876	204	204	1936-03-01	2	2	2	2	1	2	0	65.647	By MS/MS	By MS/MS	By MS/MS
P62753	sp|P62753|RS6_HUMAN	sp|P62753|RS6_HUMAN	2	2	2	sp|P62753|RS6_HUMAN 40S ribosomal protein S6 OS=Homo sapiens OX=9606 GN=RPS6 PE=1 SV=1	40S ribosomal protein S6	RPS6	Homo sapiens	1	2	2	2	1	2	2	2	2	2	1	2	2	2	2	2	1	2	2	2	2	2	2022-09-12	2022-09-12	2022-09-12	28.68	249	249	1973-03-01	1	2	2	2	2	2	0	15.484	By MS/MS	By MS/MS	By MS/MS
P62081	sp|P62081|RS7_HUMAN	sp|P62081|RS7_HUMAN	2	2	2	sp|P62081|RS7_HUMAN 40S ribosomal protein S7 OS=Homo sapiens OX=9606 GN=RPS7 PE=1 SV=1	40S ribosomal protein S7	RPS7	Homo sapiens	1	2	2	2	1	1	2	2	1	1	1	1	2	2	1	1	1	1	2	2	1	1	2022-03-10	2022-03-10	2022-03-10	22.127	194	194	2022-05-03	1	1	2	2	1	1	0.0012937	11.272	By MS/MS	By MS/MS	By MS/MS
P62241	sp|P62241|RS8_HUMAN	sp|P62241|RS8_HUMAN	3	3	3	sp|P62241|RS8_HUMAN 40S ribosomal protein S8 OS=Homo sapiens OX=9606 GN=RPS8 PE=1 SV=2	40S ribosomal protein S8	RPS8	Homo sapiens	1	3	3	3	3	3	3	3	3	3	3	3	3	3	3	3	3	3	3	3	3	3	2022-02-20	2022-02-20	2022-02-20	24.205	208	208	2022-05-03	3	3	3	3	3	3	0	35.44	By MS/MS	By MS/MS	By MS/MS
Q4GWZ2	sp|Q4GWZ2|RSSA_PIG;sp|P08865|RSSA_HUMAN	sp|Q4GWZ2|RSSA_PIG;sp|P08865|RSSA_HUMAN	6;6	6;6	6;6	sp|Q4GWZ2|RSSA_PIG 40S ribosomal protein SA OS=Sus scrofa OX=9823 GN=RPSA PE=1 SV=3;sp|P08865|RSSA_HUMAN 40S ribosomal protein SA OS=Homo sapiens OX=9606 GN=RPSA PE=1 SV=4	40S ribosomal protein SA	RPSA	Sus scrofa	2	6	6	6	5	5	5	5	6	4	5	5	5	5	6	4	5	5	5	5	6	4	31.9	31.9	31.9	32.928	295	295;295	1947-03-01	5	5	5	5	6	4	0	71.466	By MS/MS	By MS/MS	By MS/MS
P80147	sp|P80147|GABT_PIG;sp|P80404|GABT_HUMAN	sp|P80147|GABT_PIG	17;7	17;7	17;7	sp|P80147|GABT_PIG 4-aminobutyrate aminotransferase, mitochondrial OS=Sus scrofa OX=9823 GN=ABAT PE=1 SV=2	4-aminobutyrate aminotransferase, mitochondrial	ABAT	Sus scrofa	2	17	17	17	13	14	15	14	13	13	13	14	15	14	13	13	13	14	15	14	13	13	44.2	44.2	44.2	56.619	500	500;500	1948-03-01	13	14	15	14	13	13	0	140.92	By MS/MS	By MS/MS	By MS/MS
Q29228	sp|Q29228|AL9A1_PIG;sp|P49189|AL9A1_HUMAN	sp|Q29228|AL9A1_PIG	4;1	4;1	4;1	sp|Q29228|AL9A1_PIG 4-trimethylaminobutyraldehyde dehydrogenase OS=Sus scrofa OX=9823 GN=ALDH9A1 PE=2 SV=2	4-trimethylaminobutyraldehyde dehydrogenase	ALDH9A1	Sus scrofa	2	4	4	4	3	4	3	3	3	3	3	4	3	3	3	3	3	4	3	3	3	3	2022-01-11	2022-01-11	2022-01-11	53.941	494	494;494	1942-03-01	3	4	3	3	3	3	0	54.457	By MS/MS	By MS/MS	By MS/MS
P10809	sp|P10809|CH60_HUMAN	sp|P10809|CH60_HUMAN	16	16	16	sp|P10809|CH60_HUMAN 60 kDa heat shock protein, mitochondrial OS=Homo sapiens OX=9606 GN=HSPD1 PE=1 SV=2	60 kDa heat shock protein, mitochondrial	HSPD1	Homo sapiens	1	16	16	16	15	15	15	13	12	12	15	15	15	13	12	12	15	15	15	13	12	12	42.2	42.2	42.2	61.054	573	573	1936-03-01	20	21	21	19	16	17	0	323.31	By MS/MS	By MS/MS	By MS/MS
Q8NHW5	sp|Q8NHW5|RLA0L_HUMAN;sp|P05388|RLA0_HUMAN;sp|Q29214|RLA0_PIG	sp|Q8NHW5|RLA0L_HUMAN;sp|P05388|RLA0_HUMAN;sp|Q29214|RLA0_PIG	4;4;4	4;4;4	4;4;4	sp|Q8NHW5|RLA0L_HUMAN 60S acidic ribosomal protein P0-like OS=Homo sapiens OX=9606 GN=RPLP0P6 PE=5 SV=1;sp|P05388|RLA0_HUMAN 60S acidic ribosomal protein P0 OS=Homo sapiens OX=9606 GN=RPLP0 PE=1 SV=1;sp|Q29214|RLA0_PIG 60S acidic ribosomal protein P0 OS=Su	60S acidic ribosomal protein P0-like	RPLP0P6	Homo sapiens	3	4	4	4	4	4	4	4	4	4	4	4	4	4	4	4	4	4	4	4	4	4	2022-07-17	2022-07-17	2022-07-17	34.364	317	317;317;318	1945-03-01	5	6	5	5	5	5	0	30.596	By MS/MS	By MS/MS	By MS/MS
P05386	sp|P05386|RLA1_HUMAN	sp|P05386|RLA1_HUMAN	1	1	1	sp|P05386|RLA1_HUMAN 60S acidic ribosomal protein P1 OS=Homo sapiens OX=9606 GN=RPLP1 PE=1 SV=1	60S acidic ribosomal protein P1	RPLP1	Homo sapiens	1	1	1	1	1	1	1	1	1	1	1	1	1	1	1	1	1	1	1	1	1	1	14	14	14	11.514	114	114	2022-05-03	1	1	1	1	1	1	0.0033149	69.727	By MS/MS	By MS/MS	By MS/MS
P05387	sp|P05387|RLA2_HUMAN;sp|Q29315|RLA2_PIG	sp|P05387|RLA2_HUMAN	3;1	3;1	3;1	sp|P05387|RLA2_HUMAN 60S acidic ribosomal protein P2 OS=Homo sapiens OX=9606 GN=RPLP2 PE=1 SV=1	60S acidic ribosomal protein P2	RPLP2	Homo sapiens	2	3	3	3	3	3	3	3	3	3	3	3	3	3	3	3	3	3	3	3	3	3	2022-03-24	2022-03-24	2022-03-24	11.665	115	115;115	2022-05-03	3	3	3	3	3	3	0	32.64	By MS/MS	By MS/MS	By MS/MS
P62906	sp|P62906|RL10A_HUMAN;sp|P53027|RL10A_PIG	sp|P62906|RL10A_HUMAN;sp|P53027|RL10A_PIG	2;1	2;1	2;1	sp|P62906|RL10A_HUMAN 60S ribosomal protein L10a OS=Homo sapiens OX=9606 GN=RPL10A PE=1 SV=2;sp|P53027|RL10A_PIG 60S ribosomal protein L10a (Fragment) OS=Sus scrofa OX=9823 GN=RPL10A PE=2 SV=3	60S ribosomal protein L10a	RPL10A	Homo sapiens	2	2	2	2	2	2	2	2	2	2	2	2	2	2	2	2	2	2	2	2	2	2	2022-09-12	2022-09-12	2022-09-12	24.831	217	217;165	2022-02-03	3	3	3	2	2	2	0	16.925	By MS/MS	By MS/MS	By MS/MS
Q29205	sp|Q29205|RL11_PIG;sp|P62913|RL11_HUMAN	sp|Q29205|RL11_PIG;sp|P62913|RL11_HUMAN	1;1	1;1	1;1	sp|Q29205|RL11_PIG 60S ribosomal protein L11 OS=Sus scrofa OX=9823 GN=RPL11 PE=1 SV=3;sp|P62913|RL11_HUMAN 60S ribosomal protein L11 OS=Homo sapiens OX=9606 GN=RPL11 PE=1 SV=2	60S ribosomal protein L11	RPL11	Sus scrofa	2	1	1	1	1	1	1	1	1	1	1	1	1	1	1	1	1	1	1	1	1	1	2022-09-07	2022-09-07	2022-09-07	20.212	178	178;178	2022-05-03	1	1	1	1	1	1	0.0025253	10.265	By MS/MS	By MS/MS	By MS/MS
P30050	sp|P30050|RL12_HUMAN	sp|P30050|RL12_HUMAN	4	4	4	sp|P30050|RL12_HUMAN 60S ribosomal protein L12 OS=Homo sapiens OX=9606 GN=RPL12 PE=1 SV=1	60S ribosomal protein L12	RPL12	Homo sapiens	1	4	4	4	4	3	4	2	3	3	4	3	4	2	3	3	4	3	4	2	3	3	40	40	40	17.818	165	165	1932-03-01	4	3	4	2	3	3	0	41.024	By MS/MS	By MS/MS	By MS/MS
P40429	sp|P40429|RL13A_HUMAN;sp|Q6NVV1|R13P3_HUMAN;sp|Q95307|RL13A_PIG	sp|P40429|RL13A_HUMAN;sp|Q6NVV1|R13P3_HUMAN;sp|Q95307|RL13A_PIG	2;1;1	2;1;1	2;1;1	sp|P40429|RL13A_HUMAN 60S ribosomal protein L13a OS=Homo sapiens OX=9606 GN=RPL13A PE=1 SV=2;sp|Q6NVV1|R13P3_HUMAN Putative 60S ribosomal protein L13a protein RPL13AP3 OS=Homo sapiens OX=9606 GN=RPL13AP3 PE=5 SV=1;sp|Q95307|RL13A_PIG 60S ribosomal protein	60S ribosomal protein L13a	RPL13A	Homo sapiens	3	2	2	2	2	2	2	2	2	2	2	2	2	2	2	2	2	2	2	2	2	2	2022-03-11	2022-03-11	2022-03-11	23.577	203	203;102;137	2022-05-03	2	2	2	2	2	2	0	11.819	By MS/MS	By MS/MS	By MS/MS
A1XQU3	sp|A1XQU3|RL14_PIG;sp|P50914|RL14_HUMAN	sp|A1XQU3|RL14_PIG;sp|P50914|RL14_HUMAN	2;1	2;1	2;1	sp|A1XQU3|RL14_PIG 60S ribosomal protein L14 OS=Sus scrofa OX=9823 GN=RPL14 PE=1 SV=1;sp|P50914|RL14_HUMAN 60S ribosomal protein L14 OS=Homo sapiens OX=9606 GN=RPL14 PE=1 SV=4	60S ribosomal protein L14	RPL14	Sus scrofa	2	2	2	2	2	2	2	2	2	2	2	2	2	2	2	2	2	2	2	2	2	2	2022-03-11	2022-03-11	2022-03-11	23.33	213	213;215	2022-05-03	2	2	2	2	2	2	0	13.106	By MS/MS	By MS/MS	By MS/MS
P79324	sp|P79324|RL15_PIG;sp|P61313|RL15_HUMAN	sp|P79324|RL15_PIG;sp|P61313|RL15_HUMAN	1;1	1;1	1;1	sp|P79324|RL15_PIG 60S ribosomal protein L15 (Fragment) OS=Sus scrofa OX=9823 GN=RPL15 PE=2 SV=1;sp|P61313|RL15_HUMAN 60S ribosomal protein L15 OS=Homo sapiens OX=9606 GN=RPL15 PE=1 SV=2	60S ribosomal protein L15 (Fragment)	RPL15	Sus scrofa	2	1	1	1	1	1	1	1	1	1	1	1	1	1	1	1	1	1	1	1	1	1	2022-02-09	2022-02-09	2022-02-09	17.718	153	153;204	2022-05-03	1	1	1	1	1	1	0.0023502	77.902	By MS/MS	By MS/MS	By MS/MS
P18621	sp|P18621|RL17_HUMAN	sp|P18621|RL17_HUMAN	1	1	1	sp|P18621|RL17_HUMAN 60S ribosomal protein L17 OS=Homo sapiens OX=9606 GN=RPL17 PE=1 SV=3	60S ribosomal protein L17	RPL17	Homo sapiens	1	1	1	1	1	1	1	1	1	1	1	1	1	1	1	1	1	1	1	1	1	1	2022-07-08	2022-07-08	2022-07-08	21.397	184	184	2022-05-03	1	1	1	1	1	1	0.0024213	83.633	By matching	By matching	By MS/MS
Q07020	sp|Q07020|RL18_HUMAN;sp|Q95342|RL18_PIG	sp|Q07020|RL18_HUMAN;sp|Q95342|RL18_PIG	3;3	3;3	3;3	sp|Q07020|RL18_HUMAN 60S ribosomal protein L18 OS=Homo sapiens OX=9606 GN=RPL18 PE=1 SV=2;sp|Q95342|RL18_PIG 60S ribosomal protein L18 OS=Sus scrofa OX=9823 GN=RPL18 PE=1 SV=4	60S ribosomal protein L18	RPL18	Homo sapiens	2	3	3	3	3	3	3	3	3	3	3	3	3	3	3	3	3	3	3	3	3	3	2022-07-19	2022-07-19	2022-07-19	21.634	188	188;195	2022-05-03	3	3	3	3	3	3	0	22.882	By MS/MS	By MS/MS	By MS/MS
P84098	sp|P84098|RL19_HUMAN	sp|P84098|RL19_HUMAN	1	1	1	sp|P84098|RL19_HUMAN 60S ribosomal protein L19 OS=Homo sapiens OX=9606 GN=RPL19 PE=1 SV=1	60S ribosomal protein L19	RPL19	Homo sapiens	1	1	1	1	1	1	1	1	1	1	1	1	1	1	1	1	1	1	1	1	1	1	2022-07-08	2022-07-08	2022-07-08	23.466	196	196	2022-05-03	1	1	1	1	1	1	0.0025575	10.919	By MS/MS	By MS/MS	By MS/MS
P49666	sp|P49666|RL21_PIG;sp|P46778|RL21_HUMAN	sp|P49666|RL21_PIG;sp|P46778|RL21_HUMAN	1;1	1;1	1;1	sp|P49666|RL21_PIG 60S ribosomal protein L21 OS=Sus scrofa OX=9823 GN=RPL21 PE=1 SV=3;sp|P46778|RL21_HUMAN 60S ribosomal protein L21 OS=Homo sapiens OX=9606 GN=RPL21 PE=1 SV=2	60S ribosomal protein L21	RPL21	Sus scrofa	2	1	1	1	0	0	0	0	1	1	0	0	0	0	1	1	0	0	0	0	1	1	2022-04-09	2022-04-09	2022-04-09	18.565	160	160;160	2022-05-05					1	1	0.003413	73.317
P67985	sp|P67985|RL22_PIG;sp|P35268|RL22_HUMAN	sp|P67985|RL22_PIG;sp|P35268|RL22_HUMAN	1;1	1;1	1;1	sp|P67985|RL22_PIG 60S ribosomal protein L22 OS=Sus scrofa OX=9823 GN=RPL22 PE=1 SV=2;sp|P35268|RL22_HUMAN 60S ribosomal protein L22 OS=Homo sapiens OX=9606 GN=RPL22 PE=1 SV=2	60S ribosomal protein L22	RPL22	Sus scrofa	2	1	1	1	1	1	1	0	1	1	1	1	1	0	1	1	1	1	1	0	1	1	2022-02-10	2022-02-10	2022-02-10	14.759	128	128;128	2022-04-03	1	1	1		1	1	0.0023419	77.044	By MS/MS	By MS/MS	By MS/MS
P62831	sp|P62831|RL23_PIG;sp|P62829|RL23_HUMAN	sp|P62831|RL23_PIG;sp|P62829|RL23_HUMAN	2;2	2;2	2;2	sp|P62831|RL23_PIG 60S ribosomal protein L23 OS=Sus scrofa OX=9823 GN=RPL23 PE=1 SV=1;sp|P62829|RL23_HUMAN 60S ribosomal protein L23 OS=Homo sapiens OX=9606 GN=RPL23 PE=1 SV=1	60S ribosomal protein L23	RPL23	Sus scrofa	2	2	2	2	2	2	2	2	1	2	2	2	2	2	1	2	2	2	2	2	1	2	25	25	25	14.865	140	140;140	1936-03-01	2	2	2	2	1	2	0	11.751	By MS/MS	By MS/MS	By MS/MS
Q95281	sp|Q95281|RL29_PIG	sp|Q95281|RL29_PIG	1	1	1	sp|Q95281|RL29_PIG 60S ribosomal protein L29 OS=Sus scrofa OX=9823 GN=RPL29 PE=1 SV=4	60S ribosomal protein L29	RPL29	Sus scrofa	1	1	1	1	1	1	1	1	1	1	1	1	1	1	1	1	1	1	1	1	1	1	2022-02-11	2022-02-11	2022-02-11	17.497	160	160	2022-05-03	1	1	1	1	1	1	0.00246	87.684	By MS/MS	By MS/MS	By matching
P39023	sp|P39023|RL3_HUMAN	sp|P39023|RL3_HUMAN	2	2	2	sp|P39023|RL3_HUMAN 60S ribosomal protein L3 OS=Homo sapiens OX=9606 GN=RPL3 PE=1 SV=2	60S ribosomal protein L3	RPL3	Homo sapiens	1	2	2	2	1	1	2	1	1	1	1	1	2	1	1	1	1	1	2	1	1	1	2022-02-05	2022-02-05	2022-02-05	46.108	403	403	1943-03-01	1	1	2	1	1	1	0	12.168	By MS/MS	By MS/MS	By MS/MS
P62888	sp|P62888|RL30_HUMAN	sp|P62888|RL30_HUMAN	3	3	3	sp|P62888|RL30_HUMAN 60S ribosomal protein L30 OS=Homo sapiens OX=9606 GN=RPL30 PE=1 SV=2	60S ribosomal protein L30	RPL30	Homo sapiens	1	3	3	3	3	3	3	3	3	2	3	3	3	3	3	2	3	3	3	3	3	2	40.9	40.9	40.9	12.784	115	115	1935-03-01	3	3	3	3	3	2	0	22.309	By MS/MS	By MS/MS	By MS/MS
Q6QAT0	sp|Q6QAT0|RL32_PIG;sp|P62910|RL32_HUMAN	sp|Q6QAT0|RL32_PIG;sp|P62910|RL32_HUMAN	1;1	1;1	1;1	sp|Q6QAT0|RL32_PIG 60S ribosomal protein L32 OS=Sus scrofa OX=9823 GN=RPL32 PE=1 SV=3;sp|P62910|RL32_HUMAN 60S ribosomal protein L32 OS=Homo sapiens OX=9606 GN=RPL32 PE=1 SV=2	60S ribosomal protein L32	RPL32	Sus scrofa	2	1	1	1	1	1	1	1	1	1	1	1	1	1	1	1	1	1	1	1	1	1	2022-06-09	2022-06-09	2022-06-09	15.86	135	135;135	2022-05-03	1	1	1	1	1	1	0.0024301	83.741	By MS/MS	By MS/MS	By MS/MS
P36578	sp|P36578|RL4_HUMAN	sp|P36578|RL4_HUMAN	4	4	4	sp|P36578|RL4_HUMAN 60S ribosomal protein L4 OS=Homo sapiens OX=9606 GN=RPL4 PE=1 SV=5	60S ribosomal protein L4	RPL4	Homo sapiens	1	4	4	4	3	3	3	3	4	4	3	3	3	3	4	4	3	3	3	3	4	4	2022-05-15	2022-05-15	2022-05-15	47.697	427	427	2022-07-03	3	3	3	3	4	4	0	29.458	By MS/MS	By MS/MS	By MS/MS
P46777	sp|P46777|RL5_HUMAN;sp|Q95276|RL5_PIG	sp|P46777|RL5_HUMAN;sp|Q95276|RL5_PIG	2;1	2;1	2;1	sp|P46777|RL5_HUMAN 60S ribosomal protein L5 OS=Homo sapiens OX=9606 GN=RPL5 PE=1 SV=3;sp|Q95276|RL5_PIG 60S ribosomal protein L5 (Fragment) OS=Sus scrofa OX=9823 GN=RPL5 PE=2 SV=3	60S ribosomal protein L5	RPL5	Homo sapiens	2	2	2	2	2	2	2	2	1	1	2	2	2	2	1	1	2	2	2	2	1	1	2022-04-10	2022-04-10	2022-04-10	34.362	297	297;125	2022-01-03	2	2	2	2	1	1	0	12.056	By MS/MS	By MS/MS	By MS/MS
Q2YGT9	sp|Q2YGT9|RL6_PIG	sp|Q2YGT9|RL6_PIG	2	2	2	sp|Q2YGT9|RL6_PIG 60S ribosomal protein L6 OS=Sus scrofa OX=9823 GN=RPL6 PE=1 SV=3	60S ribosomal protein L6	RPL6	Sus scrofa	1	2	2	2	1	2	2	2	2	2	1	2	2	2	2	2	1	2	2	2	2	2	2022-09-09	2022-09-09	2022-09-09	32.19	284	284	1973-03-01	1	2	2	2	2	2	0	11.893	By matching	By MS/MS	By MS/MS
Q29375	sp|Q29375|RL7A_PIG;sp|P62424|RL7A_HUMAN	sp|Q29375|RL7A_PIG;sp|P62424|RL7A_HUMAN	2;2	2;2	2;2	sp|Q29375|RL7A_PIG 60S ribosomal protein L7a (Fragment) OS=Sus scrofa OX=9823 GN=RPL7A PE=2 SV=1;sp|P62424|RL7A_HUMAN 60S ribosomal protein L7a OS=Homo sapiens OX=9606 GN=RPL7A PE=1 SV=2	60S ribosomal protein L7a (Fragment)	RPL7A	Sus scrofa	2	2	2	2	2	2	2	2	2	2	2	2	2	2	2	2	2	2	2	2	2	2	2022-02-21	2022-02-21	2022-02-21	14.461	132	132;266	2022-05-03	2	2	2	2	2	2	0	17.227	By MS/MS	By MS/MS	By MS/MS
P62917	sp|P62917|RL8_HUMAN	sp|P62917|RL8_HUMAN	1	1	1	sp|P62917|RL8_HUMAN 60S ribosomal protein L8 OS=Homo sapiens OX=9606 GN=RPL8 PE=1 SV=2	60S ribosomal protein L8	RPL8	Homo sapiens	1	1	1	1	1	1	1	1	1	1	1	1	1	1	1	1	1	1	1	1	1	1	2022-02-06	2022-02-06	2022-02-06	28.024	257	257	1986-03-01	1	1	1	1	1	2	0.0043764	68.421	By matching	By MS/MS	By matching
P32969	sp|P32969|RL9_HUMAN	sp|P32969|RL9_HUMAN	2	2	2	sp|P32969|RL9_HUMAN 60S ribosomal protein L9 OS=Homo sapiens OX=9606 GN=RPL9 PE=1 SV=1	60S ribosomal protein L9	RPL9	Homo sapiens	1	2	2	2	2	2	2	2	2	2	2	2	2	2	2	2	2	2	2	2	2	2	2022-04-21	2022-04-21	2022-04-21	21.863	192	192	2022-05-03	2	2	2	2	2	2	0	13.045	By MS/MS	By MS/MS	By matching
P52209	sp|P52209|6PGD_HUMAN	sp|P52209|6PGD_HUMAN	4	4	4	sp|P52209|6PGD_HUMAN 6-phosphogluconate dehydrogenase, decarboxylating OS=Homo sapiens OX=9606 GN=PGD PE=1 SV=3	6-phosphogluconate dehydrogenase, decarboxylating	PGD	Homo sapiens	1	4	4	4	3	3	3	4	4	4	3	3	3	4	4	4	3	3	3	4	4	4	2022-01-14	2022-01-14	2022-01-14	53.139	483	483	1971-03-01	3	3	3	4	4	4	0	31.686	By MS/MS	By MS/MS	By MS/MS
P14332	sp|P14332|6PGD_PIG	sp|P14332|6PGD_PIG	3	3	3	sp|P14332|6PGD_PIG 6-phosphogluconate dehydrogenase, decarboxylating (Fragment) OS=Sus scrofa OX=9823 GN=PGD PE=2 SV=3	6-phosphogluconate dehydrogenase, decarboxylating (Fragment)	PGD	Sus scrofa	1	3	3	3	2	3	2	3	3	3	2	3	2	3	3	3	2	3	2	3	3	3	2022-02-15	2022-02-15	2022-02-15	27.805	250	250	1969-03-01	2	3	2	3	3	3	0	40.875	By MS/MS	By MS/MS	By MS/MS
P24752	sp|P24752|THIL_HUMAN	sp|P24752|THIL_HUMAN	2	2	2	sp|P24752|THIL_HUMAN Acetyl-CoA acetyltransferase, mitochondrial OS=Homo sapiens OX=9606 GN=ACAT1 PE=1 SV=1	Acetyl-CoA acetyltransferase, mitochondrial	ACAT1	Homo sapiens	1	2	2	2	2	2	2	2	2	2	2	2	2	2	2	2	2	2	2	2	2	2	2022-03-07	2022-03-07	2022-03-07	45.199	427	427	2022-05-03	2	2	2	2	2	2	0	14.892	By MS/MS	By MS/MS	By MS/MS
P39687	sp|P39687|AN32A_HUMAN	sp|P39687|AN32A_HUMAN	6	6	4	sp|P39687|AN32A_HUMAN Acidic leucine-rich nuclear phosphoprotein 32 family member A OS=Homo sapiens OX=9606 GN=ANP32A PE=1 SV=1	Acidic leucine-rich nuclear phosphoprotein 32 family member A	ANP32A	Homo sapiens	1	6	6	4	3	4	4	6	6	5	3	4	4	6	6	5	1	2	2	4	4	3	2022-01-26	2022-01-26	2022-07-19	28.585	249	249	1985-03-01	3	5	5	7	7	6	0	280.8	By MS/MS	By MS/MS	By MS/MS
Q9BTT0	sp|Q9BTT0|AN32E_HUMAN	sp|Q9BTT0|AN32E_HUMAN	4	4	4	sp|Q9BTT0|AN32E_HUMAN Acidic leucine-rich nuclear phosphoprotein 32 family member E OS=Homo sapiens OX=9606 GN=ANP32E PE=1 SV=1	Acidic leucine-rich nuclear phosphoprotein 32 family member E	ANP32E	Homo sapiens	1	4	4	4	4	4	4	3	4	4	4	4	4	3	4	4	4	4	4	3	4	4	2022-04-22	2022-04-22	2022-04-22	30.692	268	268	1948-03-01	6	5	5	4	5	6	0	39.47	By MS/MS	By MS/MS	By MS/MS
P16276	sp|P16276|ACON_PIG	sp|P16276|ACON_PIG	22	22	10	sp|P16276|ACON_PIG Aconitate hydratase, mitochondrial OS=Sus scrofa OX=9823 GN=ACO2 PE=1 SV=1	Aconitate hydratase, mitochondrial	ACO2	Sus scrofa	1	22	22	10	22	22	22	22	20	20	22	22	22	22	20	20	10	10	10	10	9	9	42.1	42.1	2022-09-16	85.76	781	781	1949-03-01	28	28	28	31	28	27	0	323.31	By MS/MS	By MS/MS	By MS/MS
Q99798	sp|Q99798|ACON_HUMAN	sp|Q99798|ACON_HUMAN	13	1	1	sp|Q99798|ACON_HUMAN Aconitate hydratase, mitochondrial OS=Homo sapiens OX=9606 GN=ACO2 PE=1 SV=2	Aconitate hydratase, mitochondrial	ACO2	Homo sapiens	1	13	1	1	13	13	13	13	12	12	1	1	1	1	1	1	1	1	1	1	1	1	2022-09-27	2022-07-02	2022-07-02	85.424	780	780	2022-05-03	2	2	2	2	2	2	0	130.98	By MS/MS	By MS/MS	By MS/MS
P68137	sp|P68137|ACTS_PIG;sp|P68133|ACTS_HUMAN;sp|P68032|ACTC_HUMAN;sp|P63267|ACTH_HUMAN;sp|P62736|ACTA_HUMAN	sp|P68137|ACTS_PIG;sp|P68133|ACTS_HUMAN;sp|P68032|ACTC_HUMAN;sp|P63267|ACTH_HUMAN;sp|P62736|ACTA_HUMAN	8;8;8;7;7	2;2;2;2;2	2;2;2;2;2	sp|P68137|ACTS_PIG Actin, alpha skeletal muscle OS=Sus scrofa OX=9823 GN=ACTA1 PE=1 SV=1;sp|P68133|ACTS_HUMAN Actin, alpha skeletal muscle OS=Homo sapiens OX=9606 GN=ACTA1 PE=1 SV=1;sp|P68032|ACTC_HUMAN Actin, alpha cardiac muscle 1 OS=Homo sapiens OX=9606	Actin, alpha skeletal muscle	ACTA1	Sus scrofa	5	8	2	2	8	7	7	7	7	7	2	2	2	2	2	2	2	2	2	2	2	2	30.2	2022-07-11	2022-07-11	42.051	377	377;377;377;376;377	2022-05-03	5	5	5	5	5	5	0	51.296	By MS/MS	By MS/MS	By MS/MS
Q6QAQ1	sp|Q6QAQ1|ACTB_PIG;sp|P60709|ACTB_HUMAN;sp|Q6S8J3|POTEE_HUMAN;sp|A5A3E0|POTEF_HUMAN;sp|Q9BYX7|ACTBM_HUMAN;sp|P0CG39|POTEJ_HUMAN;sp|P0CG38|POTEI_HUMAN	sp|Q6QAQ1|ACTB_PIG;sp|P60709|ACTB_HUMAN	14;14;5;4;3;3;3	1;1;0;0;0;0;0	1;1;0;0;0;0;0	sp|Q6QAQ1|ACTB_PIG Actin, cytoplasmic 1 OS=Sus scrofa OX=9823 GN=ACTB PE=1 SV=2;sp|P60709|ACTB_HUMAN Actin, cytoplasmic 1 OS=Homo sapiens OX=9606 GN=ACTB PE=1 SV=1	Actin, cytoplasmic 1	ACTB	Sus scrofa	7	14	1	1	14	13	13	13	13	13	1	1	1	1	1	1	1	1	1	1	1	1	61.3	2022-05-04	2022-05-04	41.736	375	375;375;1075;1075;375;1038;1075	2022-05-03	2	2	2	2	2	2	0	107.61	By MS/MS	By MS/MS	By MS/MS
P63261	sp|P63261|ACTG_HUMAN	sp|P63261|ACTG_HUMAN	14	14	1	sp|P63261|ACTG_HUMAN Actin, cytoplasmic 2 OS=Homo sapiens OX=9606 GN=ACTG1 PE=1 SV=1	Actin, cytoplasmic 2	ACTG1	Homo sapiens	1	14	14	1	14	13	13	13	13	13	14	13	13	13	13	13	1	1	1	1	1	1	61.3	61.3	2022-05-04	41.792	375	375	1959-03-01	39	40	44	48	43	46	0	323.31	By MS/MS	By MS/MS	By MS/MS
P61160	sp|P61160|ARP2_HUMAN	sp|P61160|ARP2_HUMAN	3	3	3	sp|P61160|ARP2_HUMAN Actin-related protein 2 OS=Homo sapiens OX=9606 GN=ACTR2 PE=1 SV=1	Actin-related protein 2	ACTR2	Homo sapiens	1	3	3	3	3	3	3	3	3	3	3	3	3	3	3	3	3	3	3	3	3	3	2022-09-10	2022-09-10	2022-09-10	44.76	394	394	2022-05-03	3	3	3	3	3	3	0	25.838	By MS/MS	By MS/MS	By MS/MS
Q92747	sp|Q92747|ARC1A_HUMAN;sp|O15143|ARC1B_HUMAN	sp|Q92747|ARC1A_HUMAN	4;1	4;1	4;1	sp|Q92747|ARC1A_HUMAN Actin-related protein 2/3 complex subunit 1A OS=Homo sapiens OX=9606 GN=ARPC1A PE=1 SV=2	Actin-related protein 2/3 complex subunit 1A	ARPC1A	Homo sapiens	2	4	4	4	4	4	4	3	3	3	4	4	4	3	3	3	4	4	4	3	3	3	2022-01-18	2022-01-18	2022-01-18	41.569	370	370;372	2029-03-01	4	4	4	3	3	3	0	28.257	By MS/MS	By MS/MS	By MS/MS
P59998	sp|P59998|ARPC4_HUMAN	sp|P59998|ARPC4_HUMAN	1	1	1	sp|P59998|ARPC4_HUMAN Actin-related protein 2/3 complex subunit 4 OS=Homo sapiens OX=9606 GN=ARPC4 PE=1 SV=3	Actin-related protein 2/3 complex subunit 4	ARPC4	Homo sapiens	1	1	1	1	1	1	0	0	0	0	1	1	0	0	0	0	1	1	0	0	0	0	2022-01-13	2022-01-13	2022-01-13	19.667	168	168	2022-05-01	1	1					0.0043716	68.403	By matching	By MS/MS
Q9BPX5	sp|Q9BPX5|ARP5L_HUMAN	sp|Q9BPX5|ARP5L_HUMAN	1	1	1	sp|Q9BPX5|ARP5L_HUMAN Actin-related protein 2/3 complex subunit 5-like protein OS=Homo sapiens OX=9606 GN=ARPC5L PE=1 SV=1	Actin-related protein 2/3 complex subunit 5-like protein	ARPC5L	Homo sapiens	1	1	1	1	1	1	1	1	1	0	1	1	1	1	1	0	1	1	1	1	1	0	2022-05-08	2022-05-08	2022-05-08	16.941	153	153	3	1	1	1	1	1		0.0033408	70.643	By MS/MS	By MS/MS	By MS/MS
P61158	sp|P61158|ARP3_HUMAN	sp|P61158|ARP3_HUMAN	3	3	3	sp|P61158|ARP3_HUMAN Actin-related protein 3 OS=Homo sapiens OX=9606 GN=ACTR3 PE=1 SV=3	Actin-related protein 3	ACTR3	Homo sapiens	1	3	3	3	2	3	2	1	2	2	2	3	2	1	2	2	2	3	2	1	2	2	2022-06-13	2022-06-13	2022-06-13	47.371	418	418	1931-03-01	2	3	3	1	2	2	0	18.611	By MS/MS	By MS/MS	By MS/MS
P53999	sp|P53999|TCP4_HUMAN	sp|P53999|TCP4_HUMAN	1	1	1	sp|P53999|TCP4_HUMAN Activated RNA polymerase II transcriptional coactivator p15 OS=Homo sapiens OX=9606 GN=SUB1 PE=1 SV=3	Activated RNA polymerase II transcriptional coactivator p15	SUB1	Homo sapiens	1	1	1	1	1	1	1	1	1	1	1	1	1	1	1	1	1	1	1	1	1	1	2022-02-10	2022-02-10	2022-02-10	14.395	127	127	2022-05-03	1	1	1	1	1	1	0.0023952	80.865	By MS/MS	By MS/MS	By MS/MS
P19205	sp|P19205|ACPH_PIG;sp|P13798|ACPH_HUMAN	sp|P19205|ACPH_PIG;sp|P13798|ACPH_HUMAN	3;2	3;2	3;2	sp|P19205|ACPH_PIG Acylamino-acid-releasing enzyme OS=Sus scrofa OX=9823 GN=APEH PE=1 SV=2;sp|P13798|ACPH_HUMAN Acylamino-acid-releasing enzyme OS=Homo sapiens OX=9606 GN=APEH PE=1 SV=4	Acylamino-acid-releasing enzyme	APEH	Sus scrofa	2	3	3	3	2	2	3	3	2	3	2	2	3	3	2	3	2	2	3	3	2	3	2022-08-07	2022-08-07	2022-08-07	81.243	732	732;732	1967-03-01	2	2	3	3	2	3	0	17.744	By MS/MS	By MS/MS	By MS/MS
P12026	sp|P12026|ACBP_PIG;sp|P07108|ACBP_HUMAN	sp|P12026|ACBP_PIG	5;2	5;2	5;2	sp|P12026|ACBP_PIG Acyl-CoA-binding protein OS=Sus scrofa OX=9823 GN=DBI PE=1 SV=2	Acyl-CoA-binding protein	DBI	Sus scrofa	2	5	5	5	5	5	5	4	5	5	5	5	5	4	5	5	5	5	5	4	5	5	56.3	56.3	56.3	98.962	87	87;87	1948-03-01	7	7	8	6	7	7	0	71.566	By MS/MS	By MS/MS	By MS/MS
P24540	sp|P24540|ACYP1_PIG;sp|P07311|ACYP1_HUMAN	sp|P24540|ACYP1_PIG;sp|P07311|ACYP1_HUMAN	2;1	2;1	2;1	sp|P24540|ACYP1_PIG Acylphosphatase-1 OS=Sus scrofa OX=9823 GN=ACYP1 PE=1 SV=2;sp|P07311|ACYP1_HUMAN Acylphosphatase-1 OS=Homo sapiens OX=9606 GN=ACYP1 PE=1 SV=2	Acylphosphatase-1	ACYP1	Sus scrofa	2	2	2	2	2	2	2	2	2	2	2	2	2	2	2	2	2	2	2	2	2	2	34.7	34.7	34.7	11.427	101	101;99	2022-05-03	2	2	2	2	2	2	0	15.214	By MS/MS	By MS/MS	By MS/MS
O75608	sp|O75608|LYPA1_HUMAN	sp|O75608|LYPA1_HUMAN	1	1	1	sp|O75608|LYPA1_HUMAN Acyl-protein thioesterase 1 OS=Homo sapiens OX=9606 GN=LYPLA1 PE=1 SV=1	Acyl-protein thioesterase 1	LYPLA1	Homo sapiens	1	1	1	1	1	1	1	1	1	1	1	1	1	1	1	1	1	1	1	1	1	1	2022-03-11	2022-03-11	2022-03-11	24.669	230	230	2022-05-03	1	1	1	1	1	1	0.0024752	90.119	By MS/MS	By MS/MS	By MS/MS
P46108	sp|P46108|CRK_HUMAN	sp|P46108|CRK_HUMAN	1	1	1	sp|P46108|CRK_HUMAN Adapter molecule crk OS=Homo sapiens OX=9606 GN=CRK PE=1 SV=2	Adapter molecule crk	CRK	Homo sapiens	1	1	1	1	1	1	0	0	0	1	1	1	0	0	0	1	1	1	0	0	0	1	2022-09-09	2022-09-09	2022-09-09	33.83	304	304	3	1	1				1	0.0013021	11.381	By MS/MS	By matching
Q710C4	sp|Q710C4|SAHH_PIG;sp|P23526|SAHH_HUMAN	sp|Q710C4|SAHH_PIG;sp|P23526|SAHH_HUMAN	11;6	11;6	11;6	sp|Q710C4|SAHH_PIG Adenosylhomocysteinase OS=Sus scrofa OX=9823 GN=AHCY PE=3 SV=3;sp|P23526|SAHH_HUMAN Adenosylhomocysteinase OS=Homo sapiens OX=9606 GN=AHCY PE=1 SV=4	Adenosylhomocysteinase	AHCY	Sus scrofa	2	11	11	11	9	10	9	11	9	10	9	10	9	11	9	10	9	10	9	11	9	10	31.2	31.2	31.2	47.694	432	432;432	1956-03-01	11	12	11	13	11	13	0	83.757	By MS/MS	By MS/MS	By MS/MS
Q96HN2	sp|Q96HN2|SAHH3_HUMAN;sp|O43865|SAHH2_HUMAN	sp|Q96HN2|SAHH3_HUMAN;sp|O43865|SAHH2_HUMAN	9;5	9;5	9;5	sp|Q96HN2|SAHH3_HUMAN Adenosylhomocysteinase 3 OS=Homo sapiens OX=9606 GN=AHCYL2 PE=1 SV=1;sp|O43865|SAHH2_HUMAN S-adenosylhomocysteine hydrolase-like protein 1 OS=Homo sapiens OX=9606 GN=AHCYL1 PE=1 SV=2	Adenosylhomocysteinase 3	AHCYL2	Homo sapiens	2	9	9	9	7	7	8	5	7	7	7	7	8	5	7	7	7	7	8	5	7	7	2022-04-22	2022-04-22	2022-04-22	66.72	611	611;530	1949-03-01	7	7	9	5	8	7	0	61.534	By MS/MS	By MS/MS	By MS/MS
P54819	sp|P54819|KAD2_HUMAN	sp|P54819|KAD2_HUMAN	3	3	3	sp|P54819|KAD2_HUMAN Adenylate kinase 2, mitochondrial OS=Homo sapiens OX=9606 GN=AK2 PE=1 SV=2	Adenylate kinase 2, mitochondrial	AK2	Homo sapiens	1	3	3	3	2	3	3	2	2	1	2	3	3	2	2	1	2	3	3	2	2	1	2022-08-21	2022-08-21	2022-08-21	26.477	239	239	2015-03-01	2	3	3	2	2	1	0	17.443	By MS/MS	By MS/MS	By MS/MS
P00571	sp|P00571|KAD1_PIG;sp|P00568|KAD1_HUMAN	sp|P00571|KAD1_PIG;sp|P00568|KAD1_HUMAN	4;2	4;2	4;2	sp|P00571|KAD1_PIG Adenylate kinase isoenzyme 1 OS=Sus scrofa OX=9823 GN=AK1 PE=1 SV=1;sp|P00568|KAD1_HUMAN Adenylate kinase isoenzyme 1 OS=Homo sapiens OX=9606 GN=AK1 PE=1 SV=3	Adenylate kinase isoenzyme 1	AK1	Sus scrofa	2	4	4	4	4	4	3	4	4	4	4	4	3	4	4	4	4	4	3	4	4	4	2022-02-24	2022-02-24	2022-02-24	21.639	194	194;194	1952-03-01	4	4	3	4	4	4	0	28.138	By MS/MS	By MS/MS	By MS/MS
P05141	sp|P05141|ADT2_HUMAN;sp|Q9H0C2|ADT4_HUMAN	sp|P05141|ADT2_HUMAN	6;1	6;1	3;0	sp|P05141|ADT2_HUMAN ADP/ATP translocase 2 OS=Homo sapiens OX=9606 GN=SLC25A5 PE=1 SV=7	ADP/ATP translocase 2	SLC25A5	Homo sapiens	2	6	6	3	6	6	5	5	5	5	6	6	5	5	5	5	3	3	3	3	3	3	2022-05-22	2022-05-22	2022-01-12	32.852	298	298;315	1939-03-01	7	7	6	6	6	6	0	83.064	By MS/MS	By MS/MS	By MS/MS
P12236	sp|P12236|ADT3_HUMAN;sp|Q6QRN9|ADT3_PIG;sp|P12235|ADT1_HUMAN	sp|P12236|ADT3_HUMAN;sp|Q6QRN9|ADT3_PIG;sp|P12235|ADT1_HUMAN	6;6;3	3;3;1	3;3;1	sp|P12236|ADT3_HUMAN ADP/ATP translocase 3 OS=Homo sapiens OX=9606 GN=SLC25A6 PE=1 SV=4;sp|Q6QRN9|ADT3_PIG ADP/ATP translocase 3 OS=Sus scrofa OX=9823 GN=SLC25A6 PE=2 SV=3;sp|P12235|ADT1_HUMAN ADP/ATP translocase 1 OS=Homo sapiens OX=9606 GN=SLC25A4 PE=1 S	ADP/ATP translocase 3	SLC25A6	Homo sapiens	3	6	3	3	6	6	5	5	5	5	3	3	3	3	3	3	3	3	3	3	3	3	2022-08-26	2022-04-16	2022-04-16	32.866	298	298;298;298	2022-05-03	3	3	3	3	3	3	0	44.215	By MS/MS	By MS/MS	By MS/MS
P84077	sp|P84077|ARF1_HUMAN;sp|P61204|ARF3_HUMAN	sp|P84077|ARF1_HUMAN;sp|P61204|ARF3_HUMAN	6;6	6;6	3;3	sp|P84077|ARF1_HUMAN ADP-ribosylation factor 1 OS=Homo sapiens OX=9606 GN=ARF1 PE=1 SV=2;sp|P61204|ARF3_HUMAN ADP-ribosylation factor 3 OS=Homo sapiens OX=9606 GN=ARF3 PE=1 SV=2	ADP-ribosylation factor 1	ARF1	Homo sapiens	2	6	6	3	6	6	6	6	6	6	6	6	6	6	6	6	3	3	3	3	3	3	43.1	43.1	2022-04-20	20.697	181	181;181	1954-03-01	8	7	7	8	8	8	0	109.74	By MS/MS	By MS/MS	By MS/MS
P18085	sp|P18085|ARF4_HUMAN	sp|P18085|ARF4_HUMAN	4	1	1	sp|P18085|ARF4_HUMAN ADP-ribosylation factor 4 OS=Homo sapiens OX=9606 GN=ARF4 PE=1 SV=3	ADP-ribosylation factor 4	ARF4	Homo sapiens	1	4	1	1	4	3	4	3	3	3	1	0	1	0	0	0	1	0	1	0	0	0	2022-01-31	2022-03-08	2022-03-08	20.511	180	180	2	1		1				0.0033975	72.919	By MS/MS	By matching	By MS/MS
P84085	sp|P84085|ARF5_HUMAN	sp|P84085|ARF5_HUMAN	4	1	1	sp|P84085|ARF5_HUMAN ADP-ribosylation factor 5 OS=Homo sapiens OX=9606 GN=ARF5 PE=1 SV=2	ADP-ribosylation factor 5	ARF5	Homo sapiens	1	4	1	1	4	4	4	4	4	4	1	1	1	1	1	1	1	1	1	1	1	1	2022-06-30	2022-08-07	2022-08-07	20.529	180	180	2022-05-03	1	1	1	1	1	1	0.0033898	72.918	By matching	By matching	By MS/MS
Q007T5	sp|Q007T5|ARF6_PIG;sp|P62330|ARF6_HUMAN	sp|Q007T5|ARF6_PIG;sp|P62330|ARF6_HUMAN	2;2	2;2	2;2	sp|Q007T5|ARF6_PIG ADP-ribosylation factor 6 OS=Sus scrofa OX=9823 GN=ARF6 PE=2 SV=1;sp|P62330|ARF6_HUMAN ADP-ribosylation factor 6 OS=Homo sapiens OX=9606 GN=ARF6 PE=1 SV=2	ADP-ribosylation factor 6	ARF6	Sus scrofa	2	2	2	2	2	2	2	2	2	2	2	2	2	2	2	2	2	2	2	2	2	2	2022-03-18	2022-03-18	2022-03-18	20.082	175	175;175	2022-05-03	2	2	2	2	2	2	0	12.209	By MS/MS	By MS/MS	By MS/MS
Q52NJ4	sp|Q52NJ4|ARL3_PIG;sp|P36405|ARL3_HUMAN	sp|Q52NJ4|ARL3_PIG;sp|P36405|ARL3_HUMAN	4;4	4;4	4;4	sp|Q52NJ4|ARL3_PIG ADP-ribosylation factor-like protein 3 OS=Sus scrofa OX=9823 GN=ARL3 PE=2 SV=1;sp|P36405|ARL3_HUMAN ADP-ribosylation factor-like protein 3 OS=Homo sapiens OX=9606 GN=ARL3 PE=1 SV=2	ADP-ribosylation factor-like protein 3	ARL3	Sus scrofa	2	4	4	4	4	4	4	4	4	4	4	4	4	4	4	4	4	4	4	4	4	4	31.9	31.9	31.9	20.483	182	182;182	2022-05-03	5	5	6	6	5	5	0	31.958	By MS/MS	By MS/MS	By MS/MS
Q9NVJ2	sp|Q9NVJ2|ARL8B_HUMAN;sp|Q96BM9|ARL8A_HUMAN	sp|Q9NVJ2|ARL8B_HUMAN;sp|Q96BM9|ARL8A_HUMAN	1;1	1;1	1;1	sp|Q9NVJ2|ARL8B_HUMAN ADP-ribosylation factor-like protein 8B OS=Homo sapiens OX=9606 GN=ARL8B PE=1 SV=1;sp|Q96BM9|ARL8A_HUMAN ADP-ribosylation factor-like protein 8A OS=Homo sapiens OX=9606 GN=ARL8A PE=1 SV=1	ADP-ribosylation factor-like protein 8B	ARL8B	Homo sapiens	2	1	1	1	1	1	1	1	1	1	1	1	1	1	1	1	1	1	1	1	1	1	2022-04-12	2022-04-12	2022-04-12	21.539	186	186;186	2022-05-03	1	1	1	1	1	1	0	18.317	By MS/MS	By MS/MS	By MS/MS
Q9UKK9	sp|Q9UKK9|NUDT5_HUMAN	sp|Q9UKK9|NUDT5_HUMAN	1	1	1	sp|Q9UKK9|NUDT5_HUMAN ADP-sugar pyrophosphatase OS=Homo sapiens OX=9606 GN=NUDT5 PE=1 SV=1	ADP-sugar pyrophosphatase	NUDT5	Homo sapiens	1	1	1	1	1	1	1	1	1	1	1	1	1	1	1	1	1	1	1	1	1	1	2022-04-06	2022-04-06	2022-04-06	24.327	219	219	1957-03-01	1	1	1	2	1	1	0.0025221	10.156	By MS/MS	By MS/MS	By MS/MS
Q8NHP1	sp|Q8NHP1|ARK74_HUMAN	sp|Q8NHP1|ARK74_HUMAN	1	1	1	sp|Q8NHP1|ARK74_HUMAN Aflatoxin B1 aldehyde reductase member 4 OS=Homo sapiens OX=9606 GN=AKR7L PE=2 SV=7	Aflatoxin B1 aldehyde reductase member 4	AKR7L	Homo sapiens	1	1	1	1	1	1	1	1	1	1	1	1	1	1	1	1	1	1	1	1	1	1	6	6	6	36.97	331	331	2022-05-03	1	1	1	1	1	1	0.0024969	95.763	By MS/MS	By MS/MS	By MS/MS
Q02952	sp|Q02952|AKA12_HUMAN	sp|Q02952|AKA12_HUMAN	1	1	1	sp|Q02952|AKA12_HUMAN A-kinase anchor protein 12 OS=Homo sapiens OX=9606 GN=AKAP12 PE=1 SV=4	A-kinase anchor protein 12	AKAP12	Homo sapiens	1	1	1	1	1	1	1	1	1	1	1	1	1	1	1	1	1	1	1	1	1	1	2022-01-01	2022-01-01	2022-01-01	191.48	1782	1782	2022-05-03	1	1	1	1	1	1	0.0024876	93.171	By MS/MS	By MS/MS	By MS/MS
P49588	sp|P49588|SYAC_HUMAN	sp|P49588|SYAC_HUMAN	3	3	3	sp|P49588|SYAC_HUMAN Alanine--tRNA ligase, cytoplasmic OS=Homo sapiens OX=9606 GN=AARS1 PE=1 SV=2	Alanine--tRNA ligase, cytoplasmic	AARS1	Homo sapiens	1	3	3	3	3	3	2	2	1	1	3	3	2	2	1	1	3	3	2	2	1	1	2022-04-04	2022-04-04	2022-04-04	106.81	968	968	1983-02-01	3	3	2	2	1	1	0	2022-04-18	By MS/MS	By MS/MS	By MS/MS
P08835	sp|P08835|ALBU_PIG	sp|P08835|ALBU_PIG	24	18	17	sp|P08835|ALBU_PIG Albumin OS=Sus scrofa OX=9823 GN=ALB PE=1 SV=2	Albumin	ALB	Sus scrofa	1	24	18	17	21	21	21	20	22	22	15	15	15	14	16	16	14	14	14	13	15	15	45.3	35.9	33.8	69.691	607	607	2022-05-03	18	20	18	17	19	19	0	323.31	By MS/MS	By MS/MS	By MS/MS
P51648	sp|P51648|AL3A2_HUMAN;sp|P48448|AL3B2_HUMAN;sp|P30838|AL3A1_HUMAN;sp|P43353|AL3B1_HUMAN	sp|P51648|AL3A2_HUMAN;sp|P48448|AL3B2_HUMAN;sp|P30838|AL3A1_HUMAN;sp|P43353|AL3B1_HUMAN	2;1;1;1	2;1;1;1	2;1;1;1	sp|P51648|AL3A2_HUMAN Aldehyde dehydrogenase family 3 member A2 OS=Homo sapiens OX=9606 GN=ALDH3A2 PE=1 SV=1;sp|P48448|AL3B2_HUMAN Aldehyde dehydrogenase family 3 member B2 OS=Homo sapiens OX=9606 GN=ALDH3B2 PE=2 SV=3;sp|P30838|AL3A1_HUMAN Aldehyde dehydro	Aldehyde dehydrogenase family 3 member A2	ALDH3A2	Homo sapiens	4	2	2	2	2	2	2	1	1	1	2	2	2	1	1	1	2	2	2	1	1	1	2022-09-04	2022-09-04	2022-09-04	54.847	485	485;385;453;468	3	2	2	2	1	1	1	0	12.395	By MS/MS	By MS/MS	By MS/MS
Q2XQV4	sp|Q2XQV4|ALDH2_PIG;sp|P05091|ALDH2_HUMAN	sp|Q2XQV4|ALDH2_PIG	9;3	9;3	9;3	sp|Q2XQV4|ALDH2_PIG Aldehyde dehydrogenase, mitochondrial OS=Sus scrofa OX=9823 GN=ALDH2 PE=2 SV=1	Aldehyde dehydrogenase, mitochondrial	ALDH2	Sus scrofa	2	9	9	9	9	8	9	9	8	8	9	8	9	9	8	8	9	8	9	9	8	8	2022-08-29	2022-08-29	2022-08-29	56.92	521	521;517	1957-03-01	10	10	11	12	11	11	0	101.53	By MS/MS	By MS/MS	By MS/MS
P50578	sp|P50578|AK1A1_PIG;sp|P14550|AK1A1_HUMAN	sp|P50578|AK1A1_PIG;sp|P14550|AK1A1_HUMAN	5;4	5;4	5;4	sp|P50578|AK1A1_PIG Aldo-keto reductase family 1 member A1 OS=Sus scrofa OX=9823 GN=AKR1A1 PE=1 SV=3;sp|P14550|AK1A1_HUMAN Aldo-keto reductase family 1 member A1 OS=Homo sapiens OX=9606 GN=AKR1A1 PE=1 SV=3	Aldo-keto reductase family 1 member A1	AKR1A1	Sus scrofa	2	5	5	5	5	5	5	4	5	5	5	5	5	4	5	5	5	5	5	4	5	5	2022-05-22	2022-05-22	2022-05-22	36.582	325	325;325	1934-03-01	6	6	6	4	5	5	0	39.294	By MS/MS	By MS/MS	By MS/MS
P80276	sp|P80276|ALDR_PIG	sp|P80276|ALDR_PIG	3	3	3	sp|P80276|ALDR_PIG Aldo-keto reductase family 1 member B1 OS=Sus scrofa OX=9823 GN=AKR1B1 PE=1 SV=2	Aldo-keto reductase family 1 member B1	AKR1B1	Sus scrofa	1	3	3	3	3	3	3	1	2	2	3	3	3	1	2	2	3	3	3	1	2	2	2022-08-15	2022-08-15	2022-08-15	35.868	316	316	2014-03-01	3	3	3	1	2	2	0	26.057	By MS/MS	By MS/MS	By MS/MS
P29700	sp|P29700|FETUA_PIG	sp|P29700|FETUA_PIG	1	1	1	sp|P29700|FETUA_PIG Alpha-2-HS-glycoprotein (Fragment) OS=Sus scrofa OX=9823 GN=AHSG PE=1 SV=1	Alpha-2-HS-glycoprotein (Fragment)	AHSG	Sus scrofa	1	1	1	1	0	0	0	0	1	1	0	0	0	0	1	1	0	0	0	0	1	1	2022-08-05	2022-08-05	2022-08-05	38.424	362	362	2022-05-05					1	1	0.0023557	78.255
P12814	sp|P12814|ACTN1_HUMAN;sp|P35609|ACTN2_HUMAN;sp|Q08043|ACTN3_HUMAN	sp|P12814|ACTN1_HUMAN;sp|P35609|ACTN2_HUMAN	10;5;4	3;1;1	3;1;1	sp|P12814|ACTN1_HUMAN Alpha-actinin-1 OS=Homo sapiens OX=9606 GN=ACTN1 PE=1 SV=2;sp|P35609|ACTN2_HUMAN Alpha-actinin-2 OS=Homo sapiens OX=9606 GN=ACTN2 PE=1 SV=1	Alpha-actinin-1	ACTN1	Homo sapiens	3	10	3	3	8	9	9	10	10	9	1	2	2	3	3	2	1	2	2	3	3	2	2022-09-14	2022-03-05	2022-03-05	103.06	892	892;894;901	1985-03-01	1	2	2	3	3	2	0	18.058	By MS/MS	By MS/MS	By MS/MS
O43707	sp|O43707|ACTN4_HUMAN	sp|O43707|ACTN4_HUMAN	18	18	11	sp|O43707|ACTN4_HUMAN Alpha-actinin-4 OS=Homo sapiens OX=9606 GN=ACTN4 PE=1 SV=2	Alpha-actinin-4	ACTN4	Homo sapiens	1	18	18	11	17	18	17	17	17	17	17	18	17	17	17	17	10	11	10	10	10	10	2022-09-27	2022-09-27	2022-04-18	104.85	911	911	1945-03-01	19	20	20	19	18	18	0	323.31	By MS/MS	By MS/MS	By MS/MS
P35611	sp|P35611|ADDA_HUMAN	sp|P35611|ADDA_HUMAN	4	4	4	sp|P35611|ADDA_HUMAN Alpha-adducin OS=Homo sapiens OX=9606 GN=ADD1 PE=1 SV=2	Alpha-adducin	ADD1	Homo sapiens	1	4	4	4	4	4	4	4	4	4	4	4	4	4	4	4	4	4	4	4	4	4	2022-04-09	2022-04-09	2022-04-09	80.954	737	737	2022-05-03	4	4	4	4	4	4	0	26.593	By MS/MS	By MS/MS	By MS/MS
P49419	sp|P49419|AL7A1_HUMAN	sp|P49419|AL7A1_HUMAN	2	2	2	sp|P49419|AL7A1_HUMAN Alpha-aminoadipic semialdehyde dehydrogenase OS=Homo sapiens OX=9606 GN=ALDH7A1 PE=1 SV=5	Alpha-aminoadipic semialdehyde dehydrogenase	ALDH7A1	Homo sapiens	1	2	2	2	2	2	2	2	2	2	2	2	2	2	2	2	2	2	2	2	2	2	2022-08-05	2022-08-05	2022-08-05	58.486	539	539	2022-05-03	2	2	2	2	2	2	0	14.646	By MS/MS	By MS/MS	By MS/MS
P61163	sp|P61163|ACTZ_HUMAN	sp|P61163|ACTZ_HUMAN	5	5	5	sp|P61163|ACTZ_HUMAN Alpha-centractin OS=Homo sapiens OX=9606 GN=ACTR1A PE=1 SV=1	Alpha-centractin	ACTR1A	Homo sapiens	1	5	5	5	4	4	4	4	4	5	4	4	4	4	4	5	4	4	4	4	4	5	2022-09-26	2022-09-26	2022-09-26	42.613	376	376	1943-03-01	5	5	5	4	4	5	0	74.244	By MS/MS	By MS/MS	By MS/MS
Q7M2W6	sp|Q7M2W6|CRYAB_PIG;sp|P02511|CRYAB_HUMAN	sp|Q7M2W6|CRYAB_PIG;sp|P02511|CRYAB_HUMAN	6;5	6;5	5;4	sp|Q7M2W6|CRYAB_PIG Alpha-crystallin B chain OS=Sus scrofa OX=9823 GN=CRYAB PE=2 SV=1;sp|P02511|CRYAB_HUMAN Alpha-crystallin B chain OS=Homo sapiens OX=9606 GN=CRYAB PE=1 SV=2	Alpha-crystallin B chain	CRYAB	Sus scrofa	2	6	6	5	6	5	6	6	6	6	6	5	6	6	6	6	5	4	5	5	5	5	44.6	44.6	39.4	20.129	175	175;175	1946-03-01	9	6	7	10	7	7	0	64.513	By MS/MS	By MS/MS	By MS/MS
P06733	sp|P06733|ENOA_HUMAN	sp|P06733|ENOA_HUMAN	11	8	8	sp|P06733|ENOA_HUMAN Alpha-enolase OS=Homo sapiens OX=9606 GN=ENO1 PE=1 SV=2	Alpha-enolase	ENO1	Homo sapiens	1	11	8	8	11	11	11	11	11	11	8	8	8	8	8	8	8	8	8	8	8	8	33.9	2022-02-21	2022-02-21	47.168	434	434	1944-03-01	36	31	33	31	32	31	0	323.31	By MS/MS	By MS/MS	By MS/MS
Q16352	sp|Q16352|AINX_HUMAN	sp|Q16352|AINX_HUMAN	3	2	2	sp|Q16352|AINX_HUMAN Alpha-internexin OS=Homo sapiens OX=9606 GN=INA PE=1 SV=2	Alpha-internexin	INA	Homo sapiens	1	3	2	2	2	2	1	2	3	0	1	1	1	1	2	0	1	1	1	1	2	0	2022-06-06	2022-04-04	2022-04-04	55.39	499	499	1933-03-01	1	1	1	1	2		0	12.091	By MS/MS	By matching	By MS/MS
P54920	sp|P54920|SNAA_HUMAN	sp|P54920|SNAA_HUMAN	11	11	9	sp|P54920|SNAA_HUMAN Alpha-soluble NSF attachment protein OS=Homo sapiens OX=9606 GN=NAPA PE=1 SV=3	Alpha-soluble NSF attachment protein	NAPA	Homo sapiens	1	11	11	9	11	11	10	9	10	9	11	11	10	9	10	9	9	9	8	7	8	7	53.2	53.2	45.4	33.232	295	295	1941-03-01	12	12	10	11	11	10	0	93.624	By MS/MS	By MS/MS	By MS/MS
Q6PLK3	sp|Q6PLK3|AOFB_PIG;sp|P27338|AOFB_HUMAN	sp|Q6PLK3|AOFB_PIG;sp|P27338|AOFB_HUMAN	2;1	2;1	2;1	sp|Q6PLK3|AOFB_PIG Amine oxidase [flavin-containing] B OS=Sus scrofa OX=9823 GN=MAOB PE=2 SV=3;sp|P27338|AOFB_HUMAN Amine oxidase [flavin-containing] B OS=Homo sapiens OX=9606 GN=MAOB PE=1 SV=3	Amine oxidase [flavin-containing] B	MAOB	Sus scrofa	2	2	2	2	2	2	2	1	1	1	2	2	2	1	1	1	2	2	2	1	1	1	2022-03-08	2022-03-08	2022-03-08	58.265	520	520;520	2022-09-02	2	3	2	1	1	1	0	13.684	By MS/MS	By MS/MS	By MS/MS
P49418	sp|P49418|AMPH_HUMAN	sp|P49418|AMPH_HUMAN	4	4	4	sp|P49418|AMPH_HUMAN Amphiphysin OS=Homo sapiens OX=9606 GN=AMPH PE=1 SV=1	Amphiphysin	AMPH	Homo sapiens	1	4	4	4	4	4	4	4	4	4	4	4	4	4	4	4	4	4	4	4	4	4	2022-09-10	2022-09-10	2022-09-10	76.256	695	695	1957-03-01	6	6	6	6	6	7	0	65.521	By MS/MS	By MS/MS	By MS/MS
Q01484	sp|Q01484|ANK2_HUMAN	sp|Q01484|ANK2_HUMAN	3	3	3	sp|Q01484|ANK2_HUMAN Ankyrin-2 OS=Homo sapiens OX=9606 GN=ANK2 PE=1 SV=4	Ankyrin-2	ANK2	Homo sapiens	1	3	3	3	3	3	3	2	3	3	3	3	3	2	3	3	3	3	3	2	3	3	2022-02-01	2022-02-01	2022-02-01	433.71	3957	3957	1947-03-01	3	3	3	2	3	3	0	23.729	By MS/MS	By MS/MS	By MS/MS
P19619	sp|P19619|ANXA1_PIG;sp|P04083|ANXA1_HUMAN	sp|P19619|ANXA1_PIG	5;1	5;1	5;1	sp|P19619|ANXA1_PIG Annexin A1 OS=Sus scrofa OX=9823 GN=ANXA1 PE=1 SV=3	Annexin A1	ANXA1	Sus scrofa	2	5	5	5	5	5	5	4	5	5	5	5	5	4	5	5	5	5	5	4	5	5	2022-01-21	2022-01-21	2022-01-21	38.759	346	346;346	1947-03-01	5	5	6	4	5	5	0	54.608	By MS/MS	By MS/MS	By MS/MS
P19620	sp|P19620|ANXA2_PIG;sp|P07355|ANXA2_HUMAN;sp|A6NMY6|AXA2L_HUMAN	sp|P19620|ANXA2_PIG;sp|P07355|ANXA2_HUMAN	9;6;4	9;6;4	9;6;4	sp|P19620|ANXA2_PIG Annexin A2 OS=Sus scrofa OX=9823 GN=ANXA2 PE=1 SV=4;sp|P07355|ANXA2_HUMAN Annexin A2 OS=Homo sapiens OX=9606 GN=ANXA2 PE=1 SV=2	Annexin A2	ANXA2	Sus scrofa	3	9	9	9	8	8	8	7	7	7	8	8	8	7	7	7	8	8	8	7	7	7	36.6	36.6	36.6	38.422	339	339;339;339	1936-03-01	9	8	8	8	7	7	0	65.401	By MS/MS	By MS/MS	By MS/MS
P08758	sp|P08758|ANXA5_HUMAN	sp|P08758|ANXA5_HUMAN	6	6	6	sp|P08758|ANXA5_HUMAN Annexin A5 OS=Homo sapiens OX=9606 GN=ANXA5 PE=1 SV=2	Annexin A5	ANXA5	Homo sapiens	1	6	6	6	6	6	6	6	5	5	6	6	6	6	5	5	6	6	6	6	5	5	2022-01-28	2022-01-28	2022-01-28	35.936	320	320	1938-03-01	6	6	6	6	5	5	0	81.357	By MS/MS	By MS/MS	By MS/MS
P08133	sp|P08133|ANXA6_HUMAN	sp|P08133|ANXA6_HUMAN	2	2	2	sp|P08133|ANXA6_HUMAN Annexin A6 OS=Homo sapiens OX=9606 GN=ANXA6 PE=1 SV=3	Annexin A6	ANXA6	Homo sapiens	1	2	2	2	2	2	2	1	1	1	2	2	2	1	1	1	2	2	2	1	1	1	2022-09-03	2022-09-03	2022-09-03	75.872	673	673	3	2	2	2	1	1	1	0	16.218	By MS/MS	By MS/MS	By MS/MS
Q10567	sp|Q10567|AP1B1_HUMAN	sp|Q10567|AP1B1_HUMAN	12	12	4	sp|Q10567|AP1B1_HUMAN AP-1 complex subunit beta-1 OS=Homo sapiens OX=9606 GN=AP1B1 PE=1 SV=2	AP-1 complex subunit beta-1	AP1B1	Homo sapiens	1	12	12	4	11	11	11	10	9	9	11	11	11	10	9	9	4	4	4	4	3	3	2022-01-17	2022-01-17	2022-04-07	104.64	949	949	1937-03-01	12	12	12	11	10	10	0	99.107	By MS/MS	By MS/MS	By MS/MS
O43747	sp|O43747|AP1G1_HUMAN	sp|O43747|AP1G1_HUMAN	2	2	2	sp|O43747|AP1G1_HUMAN AP-1 complex subunit gamma-1 OS=Homo sapiens OX=9606 GN=AP1G1 PE=1 SV=5	AP-1 complex subunit gamma-1	AP1G1	Homo sapiens	1	2	2	2	2	2	2	1	1	2	2	2	2	1	1	2	2	2	2	1	1	2	2022-03-03	2022-03-03	2022-03-03	91.35	822	822	2022-03-03	2	2	2	1	1	2	0.0013055	11.396	By MS/MS	By MS/MS	By MS/MS
Q9BXS5	sp|Q9BXS5|AP1M1_HUMAN	sp|Q9BXS5|AP1M1_HUMAN	2	2	2	sp|Q9BXS5|AP1M1_HUMAN AP-1 complex subunit mu-1 OS=Homo sapiens OX=9606 GN=AP1M1 PE=1 SV=3	AP-1 complex subunit mu-1	AP1M1	Homo sapiens	1	2	2	2	1	2	2	2	2	2	1	2	2	2	2	2	1	2	2	2	2	2	2022-03-07	2022-03-07	2022-03-07	48.586	423	423	1973-03-01	1	2	2	2	2	2	0	1984-11-01	By matching	By MS/MS	By MS/MS
O95782	sp|O95782|AP2A1_HUMAN	sp|O95782|AP2A1_HUMAN	8	8	5	sp|O95782|AP2A1_HUMAN AP-2 complex subunit alpha-1 OS=Homo sapiens OX=9606 GN=AP2A1 PE=1 SV=3	AP-2 complex subunit alpha-1	AP2A1	Homo sapiens	1	8	8	5	8	8	8	8	8	8	8	8	8	8	8	8	5	5	5	5	5	5	2022-02-12	2022-02-12	2022-09-06	107.54	977	977	2022-05-03	8	8	8	8	8	8	0	59.132	By MS/MS	By MS/MS	By MS/MS
O94973	sp|O94973|AP2A2_HUMAN	sp|O94973|AP2A2_HUMAN	4	1	1	sp|O94973|AP2A2_HUMAN AP-2 complex subunit alpha-2 OS=Homo sapiens OX=9606 GN=AP2A2 PE=1 SV=2	AP-2 complex subunit alpha-2	AP2A2	Homo sapiens	1	4	1	1	4	4	4	4	4	4	1	1	1	1	1	1	1	1	1	1	1	1	2022-07-06	2022-02-01	2022-02-01	103.96	939	939	2022-05-03	1	1	1	1	1	1	0.0034169	73.338	By matching	By MS/MS	By matching
P63010	sp|P63010|AP2B1_HUMAN	sp|P63010|AP2B1_HUMAN	12	4	4	sp|P63010|AP2B1_HUMAN AP-2 complex subunit beta OS=Homo sapiens OX=9606 GN=AP2B1 PE=1 SV=1	AP-2 complex subunit beta	AP2B1	Homo sapiens	1	12	4	4	11	11	11	9	9	9	4	4	4	3	3	3	4	4	4	3	3	3	2022-08-15	6	6	104.55	937	937	2029-03-01	4	4	4	3	3	3	0	23.443	By MS/MS	By MS/MS	By MS/MS
Q96CW1	sp|Q96CW1|AP2M1_HUMAN	sp|Q96CW1|AP2M1_HUMAN	3	3	3	sp|Q96CW1|AP2M1_HUMAN AP-2 complex subunit mu OS=Homo sapiens OX=9606 GN=AP2M1 PE=1 SV=2	AP-2 complex subunit mu	AP2M1	Homo sapiens	1	3	3	3	3	3	3	3	3	3	3	3	3	3	3	3	3	3	3	3	3	3	2022-07-09	2022-07-09	2022-07-09	49.654	435	435	2022-05-03	3	3	3	3	3	3	0	19.994	By MS/MS	By MS/MS	By MS/MS
P53680	sp|P53680|AP2S1_HUMAN	sp|P53680|AP2S1_HUMAN	1	1	1	sp|P53680|AP2S1_HUMAN AP-2 complex subunit sigma OS=Homo sapiens OX=9606 GN=AP2S1 PE=1 SV=2	AP-2 complex subunit sigma	AP2S1	Homo sapiens	1	1	1	1	1	1	0	0	1	1	1	1	0	0	1	1	1	1	0	0	1	1	2022-05-08	2022-05-08	2022-05-08	17.018	142	142	2022-05-03	1	1			1	1	0.0034286	73.586	By matching	By MS/MS
F1SPM8	sp|F1SPM8|AAK1_PIG;sp|Q2M2I8|AAK1_HUMAN	sp|F1SPM8|AAK1_PIG;sp|Q2M2I8|AAK1_HUMAN	4;2	4;2	4;2	sp|F1SPM8|AAK1_PIG AP2-associated protein kinase 1 OS=Sus scrofa OX=9823 GN=AAK1 PE=2 SV=2;sp|Q2M2I8|AAK1_HUMAN AP2-associated protein kinase 1 OS=Homo sapiens OX=9606 GN=AAK1 PE=1 SV=3	AP2-associated protein kinase 1	AAK1	Sus scrofa	2	4	4	4	4	4	4	4	4	4	4	4	4	4	4	4	4	4	4	4	4	4	2022-09-05	2022-09-05	2022-09-05	104.31	968	968;961	1952-03-01	4	4	4	5	4	4	0	27.387	By MS/MS	By MS/MS	By MS/MS
Q13367	sp|Q13367|AP3B2_HUMAN	sp|Q13367|AP3B2_HUMAN	1	1	1	sp|Q13367|AP3B2_HUMAN AP-3 complex subunit beta-2 OS=Homo sapiens OX=9606 GN=AP3B2 PE=1 SV=2	AP-3 complex subunit beta-2	AP3B2	Homo sapiens	1	1	1	1	1	1	1	1	1	1	1	1	1	1	1	1	1	1	1	1	1	1	2022-04-02	2022-04-02	2022-04-02	119.06	1082	1082	2022-05-03	1	1	1	1	1	1	0.0033445	70.694	By MS/MS	By MS/MS	By MS/MS
P18648	sp|P18648|APOA1_PIG	sp|P18648|APOA1_PIG	2	2	2	sp|P18648|APOA1_PIG Apolipoprotein A-I OS=Sus scrofa OX=9823 GN=APOA1 PE=1 SV=4	Apolipoprotein A-I	APOA1	Sus scrofa	1	2	2	2	2	2	2	1	1	1	2	2	2	1	1	1	2	2	2	1	1	1	2022-04-09	2022-04-09	2022-04-09	30.325	265	265	3	2	2	2	1	1	1	0	12.942	By MS/MS	By MS/MS	By matching
Q9BZZ5	sp|Q9BZZ5|API5_HUMAN	sp|Q9BZZ5|API5_HUMAN	2	2	2	sp|Q9BZZ5|API5_HUMAN Apoptosis inhibitor 5 OS=Homo sapiens OX=9606 GN=API5 PE=1 SV=3	Apoptosis inhibitor 5	API5	Homo sapiens	1	2	2	2	1	1	1	1	2	1	1	1	1	1	2	1	1	1	1	1	2	1	2022-06-04	2022-06-04	2022-06-04	59.004	524	524	1971-03-01	1	1	1	1	2	1	0	15.718	By MS/MS	By MS/MS	By MS/MS
O95831	sp|O95831|AIFM1_HUMAN	sp|O95831|AIFM1_HUMAN	7	7	7	sp|O95831|AIFM1_HUMAN Apoptosis-inducing factor 1, mitochondrial OS=Homo sapiens OX=9606 GN=AIFM1 PE=1 SV=1	Apoptosis-inducing factor 1, mitochondrial	AIFM1	Homo sapiens	1	7	7	7	6	6	6	7	7	7	6	6	6	7	7	7	6	6	6	7	7	7	2022-03-16	2022-03-16	2022-03-16	66.9	613	613	1962-03-01	6	6	6	7	7	7	0	55.112	By MS/MS	By MS/MS	By MS/MS
Q7YS78	sp|Q7YS78|ARRC_PIG;sp|P36575|ARRC_HUMAN	sp|Q7YS78|ARRC_PIG	13;2	13;2	13;2	sp|Q7YS78|ARRC_PIG Arrestin-C OS=Sus scrofa OX=9823 GN=ARR3 PE=2 SV=2	Arrestin-C	ARR3	Sus scrofa	2	13	13	13	13	13	13	13	13	12	13	13	13	13	13	12	13	13	13	13	13	12	51.2	51.2	51.2	43.238	391	391;388	1944-03-01	18	18	18	18	17	16	0	323.31	By MS/MS	By MS/MS	By MS/MS
O43776	sp|O43776|SYNC_HUMAN	sp|O43776|SYNC_HUMAN	1	1	1	sp|O43776|SYNC_HUMAN Asparagine--tRNA ligase, cytoplasmic OS=Homo sapiens OX=9606 GN=NARS1 PE=1 SV=1	Asparagine--tRNA ligase, cytoplasmic	NARS1	Homo sapiens	1	1	1	1	1	1	1	1	1	1	1	1	1	1	1	1	1	1	1	1	1	1	2022-03-03	2022-03-03	2022-03-03	62.942	548	548	2022-05-03	1	1	1	1	1	1	0.002401	81.061	By matching	By MS/MS	By matching
P00503	sp|P00503|AATC_PIG;sp|P17174|AATC_HUMAN	sp|P00503|AATC_PIG	14;5	14;5	14;5	sp|P00503|AATC_PIG Aspartate aminotransferase, cytoplasmic OS=Sus scrofa OX=9823 GN=GOT1 PE=1 SV=3	Aspartate aminotransferase, cytoplasmic	GOT1	Sus scrofa	2	14	14	14	14	14	14	14	14	14	14	14	14	14	14	14	14	14	14	14	14	14	52.5	52.5	52.5	46.474	413	413;413	1962-03-01	18	19	21	21	22	22	0	323.31	By MS/MS	By MS/MS	By MS/MS
P00506	sp|P00506|AATM_PIG;sp|P00505|AATM_HUMAN	sp|P00506|AATM_PIG	19;6	19;6	19;6	sp|P00506|AATM_PIG Aspartate aminotransferase, mitochondrial OS=Sus scrofa OX=9823 GN=GOT2 PE=1 SV=2	Aspartate aminotransferase, mitochondrial	GOT2	Sus scrofa	2	19	19	19	19	19	19	19	19	19	19	19	19	19	19	19	19	19	19	19	19	19	60.5	60.5	60.5	47.436	430	430;430	1948-03-01	50	56	50	53	51	50	0	323.31	By MS/MS	By MS/MS	By MS/MS
Q12797	sp|Q12797|ASPH_HUMAN	sp|Q12797|ASPH_HUMAN	1	1	1	sp|Q12797|ASPH_HUMAN Aspartyl/asparaginyl beta-hydroxylase OS=Homo sapiens OX=9606 GN=ASPH PE=1 SV=3	Aspartyl/asparaginyl beta-hydroxylase	ASPH	Homo sapiens	1	1	1	1	1	1	1	1	1	1	1	1	1	1	1	1	1	1	1	1	1	1	2022-04-02	2022-04-02	2022-04-02	85.862	758	758	2022-05-03	1	1	1	1	1	1	0	170.47	By MS/MS	By MS/MS	By MS/MS
Q15121	sp|Q15121|PEA15_HUMAN	sp|Q15121|PEA15_HUMAN	3	3	3	sp|Q15121|PEA15_HUMAN Astrocytic phosphoprotein PEA-15 OS=Homo sapiens OX=9606 GN=PEA15 PE=1 SV=2	Astrocytic phosphoprotein PEA-15	PEA15	Homo sapiens	1	3	3	3	3	3	3	3	3	3	3	3	3	3	3	3	3	3	3	3	3	3	35.4	35.4	35.4	2022-04-15	130	130	1941-03-01	5	5	5	5	5	4	0	39.165	By MS/MS	By MS/MS	By MS/MS
Q35914	sp|Q35914|ATP8_PIG	sp|Q35914|ATP8_PIG	1	1	1	sp|Q35914|ATP8_PIG ATP synthase protein 8 OS=Sus scrofa OX=9823 GN=MT-ATP8 PE=1 SV=2	ATP synthase protein 8	MT-ATP8	Sus scrofa	1	1	1	1	1	1	1	1	1	1	1	1	1	1	1	1	1	1	1	1	1	1	2022-09-23	2022-09-23	2022-09-23	79.474	67	67	2022-05-03	1	1	1	1	1	1	0	19.145	By MS/MS	By MS/MS	By MS/MS
P80021	sp|P80021|ATPA_PIG;sp|P25705|ATPA_HUMAN	sp|P80021|ATPA_PIG;sp|P25705|ATPA_HUMAN	15;12	15;12	15;12	sp|P80021|ATPA_PIG ATP synthase subunit alpha, mitochondrial OS=Sus scrofa OX=9823 GN=ATP5F1A PE=1 SV=2;sp|P25705|ATPA_HUMAN ATP synthase subunit alpha, mitochondrial OS=Homo sapiens OX=9606 GN=ATP5F1A PE=1 SV=1	ATP synthase subunit alpha, mitochondrial	ATP5F1A	Sus scrofa	2	15	15	15	15	15	15	15	15	15	15	15	15	15	15	15	15	15	15	15	15	15	39.4	39.4	39.4	59.687	553	553;553	1949-03-01	24	24	22	24	24	23	0	323.31	By MS/MS	By MS/MS	By MS/MS
P06576	sp|P06576|ATPB_HUMAN	sp|P06576|ATPB_HUMAN	18	18	18	sp|P06576|ATPB_HUMAN ATP synthase subunit beta, mitochondrial OS=Homo sapiens OX=9606 GN=ATP5F1B PE=1 SV=3	ATP synthase subunit beta, mitochondrial	ATP5F1B	Homo sapiens	1	18	18	18	17	18	16	18	16	18	17	18	16	18	16	18	17	18	16	18	16	18	53.3	53.3	53.3	56.559	529	529	1963-03-01	26	29	28	32	32	33	0	323.31	By MS/MS	By MS/MS	By MS/MS
P30049	sp|P30049|ATPD_HUMAN	sp|P30049|ATPD_HUMAN	2	2	2	sp|P30049|ATPD_HUMAN ATP synthase subunit delta, mitochondrial OS=Homo sapiens OX=9606 GN=ATP5F1D PE=1 SV=2	ATP synthase subunit delta, mitochondrial	ATP5F1D	Homo sapiens	1	2	2	2	2	2	2	2	2	2	2	2	2	2	2	2	2	2	2	2	2	2	2022-03-14	2022-03-14	2022-03-14	17.49	168	168	2022-05-03	3	3	3	3	3	3	0	32.065	By MS/MS	By MS/MS	By MS/MS
Q9MYT8	sp|Q9MYT8|ATP5I_PIG;sp|P56385|ATP5I_HUMAN	sp|Q9MYT8|ATP5I_PIG	3;1	3;1	3;1	sp|Q9MYT8|ATP5I_PIG ATP synthase subunit e, mitochondrial OS=Sus scrofa OX=9823 GN=ATP5ME PE=1 SV=4	ATP synthase subunit e, mitochondrial	ATP5ME	Sus scrofa	2	3	3	3	3	3	3	3	2	2	3	3	3	3	2	2	3	3	3	3	2	2	50.7	50.7	50.7	82.314	71	71;69	2025-03-01	3	3	3	3	2	2	0	26.557	By MS/MS	By MS/MS	By MS/MS
O75964	sp|O75964|ATP5L_HUMAN	sp|O75964|ATP5L_HUMAN	1	1	1	sp|O75964|ATP5L_HUMAN ATP synthase subunit g, mitochondrial OS=Homo sapiens OX=9606 GN=ATP5MG PE=1 SV=3	ATP synthase subunit g, mitochondrial	ATP5MG	Homo sapiens	1	1	1	1	1	1	1	1	1	1	1	1	1	1	1	1	1	1	1	1	1	1	2022-07-10	2022-07-10	2022-07-10	11.428	103	103	2022-05-03	1	1	1	1	1	1	0.0053476	66.661	By MS/MS	By MS/MS	By MS/MS
Q2EN81	sp|Q2EN81|ATPO_PIG;sp|P48047|ATPO_HUMAN	sp|Q2EN81|ATPO_PIG	3;1	3;1	3;1	sp|Q2EN81|ATPO_PIG ATP synthase subunit O, mitochondrial OS=Sus scrofa OX=9823 GN=ATP5PO PE=1 SV=1	ATP synthase subunit O, mitochondrial	ATP5PO	Sus scrofa	2	3	3	3	3	3	3	3	3	3	3	3	3	3	3	3	3	3	3	3	3	3	2022-05-23	2022-05-23	2022-05-23	23.369	213	213;213	2022-05-03	4	4	4	4	4	4	0	51.53	By MS/MS	By MS/MS	By MS/MS
P13618	sp|P13618|ATP5J_PIG	sp|P13618|ATP5J_PIG	4	4	4	sp|P13618|ATP5J_PIG ATP synthase-coupling factor 6, mitochondrial OS=Sus scrofa OX=9823 GN=ATP5PF PE=1 SV=1	ATP synthase-coupling factor 6, mitochondrial	ATP5PF	Sus scrofa	1	4	4	4	3	3	3	3	3	4	3	3	3	3	3	4	3	3	3	3	3	4	57.9	57.9	57.9	89.299	76	76	2022-06-03	4	4	4	4	4	5	0	48.919	By MS/MS	By MS/MS	By MS/MS
O43681	sp|O43681|GET3_HUMAN	sp|O43681|GET3_HUMAN	5	5	5	sp|O43681|GET3_HUMAN ATPase GET3 OS=Homo sapiens OX=9606 GN=GET3 PE=1 SV=2	ATPase GET3	GET3	Homo sapiens	1	5	5	5	4	4	2	3	4	3	4	4	2	3	4	3	4	4	2	3	4	3	23	23	23	38.792	348	348	2022-04-03	4	4	2	3	4	3	0	30.814	By MS/MS	By MS/MS	By MS/MS
P53396	sp|P53396|ACLY_HUMAN	sp|P53396|ACLY_HUMAN	2	2	2	sp|P53396|ACLY_HUMAN ATP-citrate synthase OS=Homo sapiens OX=9606 GN=ACLY PE=1 SV=3	ATP-citrate synthase	ACLY	Homo sapiens	1	2	2	2	2	2	2	1	1	1	2	2	2	1	1	1	2	2	2	1	1	1	2022-06-02	2022-06-02	2022-06-02	120.84	1101	1101	3	2	2	2	1	1	1	0	12.655	By matching	By MS/MS	By MS/MS
P17858	sp|P17858|PFKAL_HUMAN	sp|P17858|PFKAL_HUMAN	5	5	4	sp|P17858|PFKAL_HUMAN ATP-dependent 6-phosphofructokinase, liver type OS=Homo sapiens OX=9606 GN=PFKL PE=1 SV=6	ATP-dependent 6-phosphofructokinase, liver type	PFKL	Homo sapiens	1	5	5	4	5	5	5	5	5	5	5	5	5	5	5	5	4	4	4	4	4	4	10	10	2022-06-07	85.018	780	780	1947-03-01	6	6	6	7	5	6	0	54.574	By MS/MS	By MS/MS	By MS/MS
P08237	sp|P08237|PFKAM_HUMAN	sp|P08237|PFKAM_HUMAN	10	1	1	sp|P08237|PFKAM_HUMAN ATP-dependent 6-phosphofructokinase, muscle type OS=Homo sapiens OX=9606 GN=PFKM PE=1 SV=2	ATP-dependent 6-phosphofructokinase, muscle type	PFKM	Homo sapiens	1	10	1	1	9	10	10	10	9	9	1	1	1	1	1	1	1	1	1	1	1	1	2022-05-20	2022-02-02	2022-02-02	85.182	780	780	2022-05-03	1	1	1	1	1	1	0	1956-11-01	By MS/MS	By MS/MS	By MS/MS
Q2HYU2	sp|Q2HYU2|PFKAM_PIG	sp|Q2HYU2|PFKAM_PIG	15	15	6	sp|Q2HYU2|PFKAM_PIG ATP-dependent 6-phosphofructokinase, muscle type OS=Sus scrofa OX=9823 GN=PFKM PE=2 SV=1	ATP-dependent 6-phosphofructokinase, muscle type	PFKM	Sus scrofa	1	15	15	6	14	15	15	15	14	14	14	15	15	15	14	14	6	6	6	6	6	6	2022-07-29	2022-07-29	2022-04-11	85.326	780	780	2022-05-03	16	17	19	19	17	16	0	323.31	By MS/MS	By MS/MS	By MS/MS
Q01813	sp|Q01813|PFKAP_HUMAN	sp|Q01813|PFKAP_HUMAN	3	2	2	sp|Q01813|PFKAP_HUMAN ATP-dependent 6-phosphofructokinase, platelet type OS=Homo sapiens OX=9606 GN=PFKP PE=1 SV=2	ATP-dependent 6-phosphofructokinase, platelet type	PFKP	Homo sapiens	1	3	2	2	3	3	3	3	2	3	2	2	2	2	1	2	2	2	2	2	1	2	2022-06-06	2022-02-04	2022-02-04	85.595	784	784	1936-03-01	2	2	2	2	1	2	0	24.189	By MS/MS	By MS/MS	By MS/MS
Q16740	sp|Q16740|CLPP_HUMAN	sp|Q16740|CLPP_HUMAN	1	1	1	sp|Q16740|CLPP_HUMAN ATP-dependent Clp protease proteolytic subunit, mitochondrial OS=Homo sapiens OX=9606 GN=CLPP PE=1 SV=1	ATP-dependent Clp protease proteolytic subunit, mitochondrial	CLPP	Homo sapiens	1	1	1	1	1	0	0	0	0	0	1	0	0	0	0	0	1	0	0	0	0	0	2022-04-05	2022-04-05	2022-04-05	30.18	277	277	1	1						0.0053248	6.645	By MS/MS
Q08211	sp|Q08211|DHX9_HUMAN	sp|Q08211|DHX9_HUMAN	3	3	3	sp|Q08211|DHX9_HUMAN ATP-dependent RNA helicase A OS=Homo sapiens OX=9606 GN=DHX9 PE=1 SV=4	ATP-dependent RNA helicase A	DHX9	Homo sapiens	1	3	3	3	3	3	3	3	3	3	3	3	3	3	3	3	3	3	3	3	3	3	2022-05-03	2022-05-03	2022-05-03	140.96	1270	1270	1953-03-01	3	3	3	4	3	3	0	21.217	By MS/MS	By MS/MS	By MS/MS
Q92499	sp|Q92499|DDX1_HUMAN	sp|Q92499|DDX1_HUMAN	5	5	5	sp|Q92499|DDX1_HUMAN ATP-dependent RNA helicase DDX1 OS=Homo sapiens OX=9606 GN=DDX1 PE=1 SV=2	ATP-dependent RNA helicase DDX1	DDX1	Homo sapiens	1	5	5	5	4	4	3	3	4	5	4	4	3	3	4	5	4	4	3	3	4	5	2022-04-10	2022-04-10	2022-04-10	82.431	740	740	1961-03-01	4	4	3	3	4	5	0	34.194	By MS/MS	By MS/MS	By MS/MS
O15523	sp|O15523|DDX3Y_HUMAN;sp|O00571|DDX3X_HUMAN	sp|O15523|DDX3Y_HUMAN;sp|O00571|DDX3X_HUMAN	2;2	2;2	2;2	sp|O15523|DDX3Y_HUMAN ATP-dependent RNA helicase DDX3Y OS=Homo sapiens OX=9606 GN=DDX3Y PE=1 SV=2;sp|O00571|DDX3X_HUMAN ATP-dependent RNA helicase DDX3X OS=Homo sapiens OX=9606 GN=DDX3X PE=1 SV=3	ATP-dependent RNA helicase DDX3Y	DDX3Y	Homo sapiens	2	2	2	2	1	2	2	2	1	1	1	2	2	2	1	1	1	2	2	2	1	1	2022-04-04	2022-04-04	2022-04-04	73.153	660	660;662	1933-03-01	1	2	2	2	1	1	0	12.895	By matching	By MS/MS	By MS/MS
O43491	sp|O43491|E41L2_HUMAN	sp|O43491|E41L2_HUMAN	8	8	7	sp|O43491|E41L2_HUMAN Band 4.1-like protein 2 OS=Homo sapiens OX=9606 GN=EPB41L2 PE=1 SV=1	Band 4.1-like protein 2	EPB41L2	Homo sapiens	1	8	8	7	8	8	8	8	8	8	8	8	8	8	8	8	7	7	7	7	7	7	2022-01-14	2022-01-14	2022-01-13	112.59	1005	1005	1946-03-01	11	12	12	12	10	11	0	323.31	By MS/MS	By MS/MS	By MS/MS
Q9Y2J2	sp|Q9Y2J2|E41L3_HUMAN	sp|Q9Y2J2|E41L3_HUMAN	3	2	2	sp|Q9Y2J2|E41L3_HUMAN Band 4.1-like protein 3 OS=Homo sapiens OX=9606 GN=EPB41L3 PE=1 SV=2	Band 4.1-like protein 3	EPB41L3	Homo sapiens	1	3	2	2	3	3	3	3	2	2	2	2	2	2	1	1	2	2	2	2	1	1	2022-01-03	2022-02-02	2022-02-02	120.68	1087	1087	2022-01-03	2	2	2	2	1	1	0	12.087	By MS/MS	By MS/MS	By MS/MS
P51572	sp|P51572|BAP31_HUMAN	sp|P51572|BAP31_HUMAN	1	1	1	sp|P51572|BAP31_HUMAN B-cell receptor-associated protein 31 OS=Homo sapiens OX=9606 GN=BCAP31 PE=1 SV=3	B-cell receptor-associated protein 31	BCAP31	Homo sapiens	1	1	1	1	1	1	1	1	1	0	1	1	1	1	1	0	1	1	1	1	1	0	2022-01-04	2022-01-04	2022-01-04	27.991	246	246	3	1	1	1	1	1		0	22.432	By MS/MS	By matching	By matching
Q562R1	sp|Q562R1|ACTBL_HUMAN	sp|Q562R1|ACTBL_HUMAN	3	1	1	sp|Q562R1|ACTBL_HUMAN Beta-actin-like protein 2 OS=Homo sapiens OX=9606 GN=ACTBL2 PE=1 SV=2	Beta-actin-like protein 2	ACTBL2	Homo sapiens	1	3	1	1	3	2	2	2	2	3	1	0	0	0	0	1	1	0	0	0	0	1	12	2022-08-04	2022-08-04	42.003	376	376	2022-05-03	1					1	0.0024242	83.706	By MS/MS	By matching	By matching
P35612	sp|P35612|ADDB_HUMAN	sp|P35612|ADDB_HUMAN	2	2	2	sp|P35612|ADDB_HUMAN Beta-adducin OS=Homo sapiens OX=9606 GN=ADD2 PE=1 SV=3	Beta-adducin	ADD2	Homo sapiens	1	2	2	2	2	2	2	2	2	2	2	2	2	2	2	2	2	2	2	2	2	2	2022-01-04	2022-01-04	2022-01-04	80.853	726	726	2022-05-03	2	2	2	2	2	2	0	13.906	By matching	By MS/MS	By MS/MS
P42025	sp|P42025|ACTY_HUMAN	sp|P42025|ACTY_HUMAN	1	1	1	sp|P42025|ACTY_HUMAN Beta-centractin OS=Homo sapiens OX=9606 GN=ACTR1B PE=1 SV=1	Beta-centractin	ACTR1B	Homo sapiens	1	1	1	1	1	1	1	1	1	1	1	1	1	1	1	1	1	1	1	1	1	1	2022-01-06	2022-01-06	2022-01-06	42.293	376	376	2022-05-03	1	1	1	1	1	1	0.0025316	10.463	By MS/MS	By MS/MS	By MS/MS
P43320	sp|P43320|CRBB2_HUMAN	sp|P43320|CRBB2_HUMAN	1	1	1	sp|P43320|CRBB2_HUMAN Beta-crystallin B2 OS=Homo sapiens OX=9606 GN=CRYBB2 PE=1 SV=2	Beta-crystallin B2	CRYBB2	Homo sapiens	1	1	1	1	0	0	0	1	0	0	0	0	0	1	0	0	0	0	0	1	0	0	2022-08-09	2022-08-09	2022-08-09	23.38	205	205	4				1			0	14.706
Q1KYT0	sp|Q1KYT0|ENOB_PIG;sp|P13929|ENOB_HUMAN	sp|Q1KYT0|ENOB_PIG;sp|P13929|ENOB_HUMAN	6;6	3;3	3;3	sp|Q1KYT0|ENOB_PIG Beta-enolase OS=Sus scrofa OX=9823 GN=ENO3 PE=2 SV=1;sp|P13929|ENOB_HUMAN Beta-enolase OS=Homo sapiens OX=9606 GN=ENO3 PE=1 SV=5	Beta-enolase	ENO3	Sus scrofa	2	6	3	3	6	6	5	5	5	5	3	3	2	2	2	2	3	3	2	2	2	2	2022-01-22	2022-04-09	2022-04-09	47.13	434	434;434	2016-03-01	22	22	22	16	14	13	0	151.85	By MS/MS	By MS/MS	By MS/MS
Q9H115	sp|Q9H115|SNAB_HUMAN	sp|Q9H115|SNAB_HUMAN	8	6	6	sp|Q9H115|SNAB_HUMAN Beta-soluble NSF attachment protein OS=Homo sapiens OX=9606 GN=NAPB PE=1 SV=2	Beta-soluble NSF attachment protein	NAPB	Homo sapiens	1	8	6	6	8	8	7	7	8	7	6	6	5	5	6	5	6	6	5	5	6	5	37.2	2022-05-29	2022-05-29	33.557	298	298	1931-03-01	7	7	6	5	6	5	0	94.246	By MS/MS	By MS/MS	By MS/MS
Q16143	sp|Q16143|SYUB_HUMAN	sp|Q16143|SYUB_HUMAN	3	3	3	sp|Q16143|SYUB_HUMAN Beta-synuclein OS=Homo sapiens OX=9606 GN=SNCB PE=1 SV=1	Beta-synuclein	SNCB	Homo sapiens	1	3	3	3	3	3	3	3	3	3	3	3	3	3	3	3	3	3	3	3	3	3	2022-09-29	2022-09-29	2022-09-29	14.288	134	134	2022-05-03	4	4	4	4	4	4	0	82.333	By MS/MS	By MS/MS	By MS/MS
P07814	sp|P07814|SYEP_HUMAN	sp|P07814|SYEP_HUMAN	1	1	1	sp|P07814|SYEP_HUMAN Bifunctional glutamate/proline--tRNA ligase OS=Homo sapiens OX=9606 GN=EPRS1 PE=1 SV=5	Bifunctional glutamate/proline--tRNA ligase	EPRS1	Homo sapiens	1	1	1	1	1	1	1	1	1	1	1	1	1	1	1	1	1	1	1	1	1	1	0.9	0.9	0.9	170.59	1512	1512	2022-05-03	1	1	1	1	1	1	0.0094538	65.424	By MS/MS	By MS/MS	By MS/MS
P50584	sp|P50584|AP4A_PIG	sp|P50584|AP4A_PIG	1	1	1	sp|P50584|AP4A_PIG Bis(5-nucleosyl)-tetraphosphatase [asymmetrical] OS=Sus scrofa OX=9823 GN=NUDT2 PE=2 SV=3	Bis(5-nucleosyl)-tetraphosphatase [asymmetrical]	NUDT2	Sus scrofa	1	1	1	1	1	1	0	1	0	1	1	1	0	1	0	1	1	1	0	1	0	1	2022-05-09	2022-05-09	2022-05-09	16.835	147	147	2025-03-01	1	1		1		1	0.0074074	65.918	By matching	By MS/MS
P80723	sp|P80723|BASP1_HUMAN	sp|P80723|BASP1_HUMAN	2	2	2	sp|P80723|BASP1_HUMAN Brain acid soluble protein 1 OS=Homo sapiens OX=9606 GN=BASP1 PE=1 SV=2	Brain acid soluble protein 1	BASP1	Homo sapiens	1	2	2	2	2	2	2	2	2	2	2	2	2	2	2	2	2	2	2	2	2	2	2022-09-11	2022-09-11	2022-09-11	22.693	227	227	1942-03-01	3	4	3	3	3	3	0	22.722	By MS/MS	By MS/MS	By MS/MS
P11586	sp|P11586|C1TC_HUMAN	sp|P11586|C1TC_HUMAN	2	2	2	sp|P11586|C1TC_HUMAN C-1-tetrahydrofolate synthase, cytoplasmic OS=Homo sapiens OX=9606 GN=MTHFD1 PE=1 SV=3	C-1-tetrahydrofolate synthase, cytoplasmic	MTHFD1	Homo sapiens	1	2	2	2	2	1	1	1	1	1	2	1	1	1	1	1	2	1	1	1	1	1	2022-07-02	2022-07-02	2022-07-02	101.56	935	935	2014-03-01	2	1	1	1	1	1	0	12.248	By MS/MS	By MS/MS	By MS/MS
P05937	sp|P05937|CALB1_HUMAN	sp|P05937|CALB1_HUMAN	3	2	2	sp|P05937|CALB1_HUMAN Calbindin OS=Homo sapiens OX=9606 GN=CALB1 PE=1 SV=2	Calbindin	CALB1	Homo sapiens	1	3	2	2	3	3	3	3	3	3	2	2	2	2	2	2	2	2	2	2	2	2	2022-03-15	2022-01-11	2022-01-11	30.025	261	261	1979-03-01	2	2	2	2	3	3	0	20.631	By MS/MS	By MS/MS	By MS/MS
P63098	sp|P63098|CANB1_HUMAN	sp|P63098|CANB1_HUMAN	1	1	1	sp|P63098|CANB1_HUMAN Calcineurin subunit B type 1 OS=Homo sapiens OX=9606 GN=PPP3R1 PE=1 SV=2	Calcineurin subunit B type 1	PPP3R1	Homo sapiens	1	1	1	1	1	1	1	1	1	1	1	1	1	1	1	1	1	1	1	1	1	1	2022-04-09	2022-04-09	2022-04-09	2022-03-19	170	170	2022-05-03	1	1	1	1	1	1	0	35.352	By MS/MS	By MS/MS	By matching
Q95266	sp|Q95266|KCC2D_PIG;sp|Q13557|KCC2D_HUMAN;sp|Q9UQM7|KCC2A_HUMAN;sp|Q13555|KCC2G_HUMAN;sp|Q13554|KCC2B_HUMAN	sp|Q95266|KCC2D_PIG;sp|Q13557|KCC2D_HUMAN	8;8;2;2;2	8;8;2;2;2	8;8;2;2;2	sp|Q95266|KCC2D_PIG Calcium/calmodulin-dependent protein kinase type II subunit delta OS=Sus scrofa OX=9823 GN=CAMK2D PE=2 SV=1;sp|Q13557|KCC2D_HUMAN Calcium/calmodulin-dependent protein kinase type II subunit delta OS=Homo sapiens OX=9606 GN=CAMK2D PE=1 S	Calcium/calmodulin-dependent protein kinase type II subunit delta	CAMK2D	Sus scrofa	5	8	8	8	8	8	8	8	8	8	8	8	8	8	8	8	8	8	8	8	8	8	2022-05-29	2022-05-29	2022-05-29	56.389	499	499;499;478;558;666	1944-03-01	10	11	11	11	10	9	0	270.77	By MS/MS	By MS/MS	By MS/MS
O75746	sp|O75746|CMC1_HUMAN	sp|O75746|CMC1_HUMAN	2	2	2	sp|O75746|CMC1_HUMAN Calcium-binding mitochondrial carrier protein Aralar1 OS=Homo sapiens OX=9606 GN=SLC25A12 PE=1 SV=2	Calcium-binding mitochondrial carrier protein Aralar1	SLC25A12	Homo sapiens	1	2	2	2	2	2	2	2	2	2	2	2	2	2	2	2	2	2	2	2	2	2	2022-08-03	2022-08-03	2022-08-03	74.761	678	678	2022-05-03	2	2	2	2	2	2	0	12.323	By MS/MS	By MS/MS	By MS/MS
Q9UJS0	sp|Q9UJS0|CMC2_HUMAN	sp|Q9UJS0|CMC2_HUMAN	1	1	1	sp|Q9UJS0|CMC2_HUMAN Calcium-binding mitochondrial carrier protein Aralar2 OS=Homo sapiens OX=9606 GN=SLC25A13 PE=1 SV=2	Calcium-binding mitochondrial carrier protein Aralar2	SLC25A13	Homo sapiens	1	1	1	1	0	1	1	1	0	1	0	1	1	1	0	1	0	1	1	1	0	1	2022-03-03	2022-03-03	2022-03-03	74.175	675	675	1975-03-01		1	1	1		1	0.0094439	65.405		By matching	By matching
Q9ULU8	sp|Q9ULU8|CAPS1_HUMAN;sp|Q86UW7|CAPS2_HUMAN	sp|Q9ULU8|CAPS1_HUMAN	12;3	12;3	12;3	sp|Q9ULU8|CAPS1_HUMAN Calcium-dependent secretion activator 1 OS=Homo sapiens OX=9606 GN=CADPS PE=1 SV=3	Calcium-dependent secretion activator 1	CADPS	Homo sapiens	2	12	12	12	11	12	12	8	9	7	11	12	12	8	9	7	11	12	12	8	9	7	2022-08-13	2022-08-13	2022-08-13	152.78	1353	1353;1296	2024-03-01	12	13	14	9	10	8	0	97.255	By MS/MS	By MS/MS	By MS/MS
Q9HB71	sp|Q9HB71|CYBP_HUMAN	sp|Q9HB71|CYBP_HUMAN	1	1	1	sp|Q9HB71|CYBP_HUMAN Calcyclin-binding protein OS=Homo sapiens OX=9606 GN=CACYBP PE=1 SV=2	Calcyclin-binding protein	CACYBP	Homo sapiens	1	1	1	1	1	1	1	1	1	1	1	1	1	1	1	1	1	1	1	1	1	1	2022-01-10	2022-01-10	2022-01-10	26.21	228	228	2022-05-03	2	2	2	2	2	2	0.0023895	80.678	By MS/MS	By MS/MS	By MS/MS
P48539	sp|P48539|PCP4_HUMAN	sp|P48539|PCP4_HUMAN	1	1	1	sp|P48539|PCP4_HUMAN Calmodulin regulator protein PCP4 OS=Homo sapiens OX=9606 GN=PCP4 PE=1 SV=3	Calmodulin regulator protein PCP4	PCP4	Homo sapiens	1	1	1	1	1	1	1	1	1	1	1	1	1	1	1	1	1	1	1	1	1	1	2022-08-25	2022-08-25	2022-08-25	67.913	62	62	2022-05-03	1	1	1	1	1	1	0.0024272	83.716	By MS/MS	By MS/MS	By MS/MS
P0DP25	sp|P0DP25|CALM3_HUMAN;sp|P0DP24|CALM2_HUMAN;sp|P0DP23|CALM1_HUMAN	sp|P0DP25|CALM3_HUMAN;sp|P0DP24|CALM2_HUMAN;sp|P0DP23|CALM1_HUMAN	7;7;7	7;7;7	7;7;7	sp|P0DP25|CALM3_HUMAN Calmodulin-3 OS=Homo sapiens OX=9606 GN=CALM3 PE=1 SV=1;sp|P0DP24|CALM2_HUMAN Calmodulin-2 OS=Homo sapiens OX=9606 GN=CALM2 PE=1 SV=1;sp|P0DP23|CALM1_HUMAN Calmodulin-1 OS=Homo sapiens OX=9606 GN=CALM1 PE=1 SV=1	Calmodulin-3	CALM3	Homo sapiens	3	7	7	7	7	7	7	7	7	6	7	7	7	7	7	6	7	7	7	7	7	6	53	53	53	16.837	149	149;149;149	1949-03-01	9	9	10	9	9	9	0	174.85	By MS/MS	By MS/MS	By MS/MS
P27824	sp|P27824|CALX_HUMAN	sp|P27824|CALX_HUMAN	8	8	8	sp|P27824|CALX_HUMAN Calnexin OS=Homo sapiens OX=9606 GN=CANX PE=1 SV=2	Calnexin	CANX	Homo sapiens	1	8	8	8	7	8	6	6	6	6	7	8	6	6	6	6	7	8	6	6	6	6	2022-09-17	2022-09-17	2022-09-17	67.567	592	592	1943-03-01	9	10	8	9	9	8	0	323.31	By MS/MS	By MS/MS	By MS/MS
P28491	sp|P28491|CALR_PIG;sp|P27797|CALR_HUMAN	sp|P28491|CALR_PIG;sp|P27797|CALR_HUMAN	9;6	9;6	9;6	sp|P28491|CALR_PIG Calreticulin OS=Sus scrofa OX=9823 GN=CALR PE=1 SV=3;sp|P27797|CALR_HUMAN Calreticulin OS=Homo sapiens OX=9606 GN=CALR PE=1 SV=1	Calreticulin	CALR	Sus scrofa	2	9	9	9	9	9	9	9	9	8	9	9	9	9	9	8	9	9	9	9	9	8	39.3	39.3	39.3	48.287	417	417;417	1944-03-01	14	17	19	15	16	13	0	93.824	By MS/MS	By MS/MS	By MS/MS
P22676	sp|P22676|CALB2_HUMAN	sp|P22676|CALB2_HUMAN	5	5	4	sp|P22676|CALB2_HUMAN Calretinin OS=Homo sapiens OX=9606 GN=CALB2 PE=2 SV=2	Calretinin	CALB2	Homo sapiens	1	5	5	4	5	5	5	4	4	4	5	5	5	4	4	4	4	4	4	3	3	3	2022-03-20	2022-03-20	2022-02-16	31.54	271	271	1933-03-01	5	5	5	4	4	4	0	112.49	By MS/MS	By MS/MS	By MS/MS
O43852	sp|O43852|CALU_HUMAN	sp|O43852|CALU_HUMAN	9	9	9	sp|O43852|CALU_HUMAN Calumenin OS=Homo sapiens OX=9606 GN=CALU PE=1 SV=2	Calumenin	CALU	Homo sapiens	1	9	9	9	9	8	7	8	7	8	9	8	7	8	7	8	9	8	7	8	7	8	40.6	40.6	40.6	37.106	315	315	1942-03-01	9	8	8	8	7	8	0	65.558	By MS/MS	By MS/MS	By MS/MS
P36887	sp|P36887|KAPCA_PIG;sp|P17612|KAPCA_HUMAN;sp|P22612|KAPCG_HUMAN	sp|P36887|KAPCA_PIG;sp|P17612|KAPCA_HUMAN	3;2;1	3;2;1	2;1;0	sp|P36887|KAPCA_PIG cAMP-dependent protein kinase catalytic subunit alpha OS=Sus scrofa OX=9823 GN=PRKACA PE=1 SV=4;sp|P17612|KAPCA_HUMAN cAMP-dependent protein kinase catalytic subunit alpha OS=Homo sapiens OX=9606 GN=PRKACA PE=1 SV=2	cAMP-dependent protein kinase catalytic subunit alpha	PRKACA	Sus scrofa	3	3	3	2	3	3	3	3	3	2	3	3	3	3	3	2	2	2	2	2	2	1	2022-07-13	2022-07-13	2022-03-08	40.616	351	351;351;351	1935-03-01	3	3	3	3	3	2	0	22.907	By MS/MS	By MS/MS	By MS/MS
P13861	sp|P13861|KAP2_HUMAN;sp|P05207|KAP2_PIG	sp|P13861|KAP2_HUMAN	6;1	6;1	6;1	sp|P13861|KAP2_HUMAN cAMP-dependent protein kinase type II-alpha regulatory subunit OS=Homo sapiens OX=9606 GN=PRKAR2A PE=1 SV=2	cAMP-dependent protein kinase type II-alpha regulatory subunit	PRKAR2A	Homo sapiens	2	6	6	6	6	6	6	6	6	6	6	6	6	6	6	6	6	6	6	6	6	6	2022-05-20	2022-05-20	2022-05-20	45.518	404	404;155	2022-05-03	6	6	6	6	6	6	0	55.395	By MS/MS	By MS/MS	By MS/MS
Q14444	sp|Q14444|CAPR1_HUMAN	sp|Q14444|CAPR1_HUMAN	2	2	2	sp|Q14444|CAPR1_HUMAN Caprin-1 OS=Homo sapiens OX=9606 GN=CAPRIN1 PE=1 SV=2	Caprin-1	CAPRIN1	Homo sapiens	1	2	2	2	2	2	2	0	2	2	2	2	2	0	2	2	2	2	2	0	2	2	2022-06-07	2022-06-07	2022-06-07	78.365	709	709	2022-04-03	2	2	2		2	2	0	20.424	By MS/MS	By MS/MS	By MS/MS
P00918	sp|P00918|CAH2_HUMAN	sp|P00918|CAH2_HUMAN	1	1	1	sp|P00918|CAH2_HUMAN Carbonic anhydrase 2 OS=Homo sapiens OX=9606 GN=CA2 PE=1 SV=2	Carbonic anhydrase 2	CA2	Homo sapiens	1	1	1	1	1	1	1	1	1	1	1	1	1	1	1	1	1	1	1	1	1	1	5	5	5	29.246	260	260	2022-05-03	2	2	2	2	2	2	0.0024184	83.599	By MS/MS	By MS/MS	By MS/MS
Q5S1S4	sp|Q5S1S4|CAH3_PIG;sp|P07451|CAH3_HUMAN	sp|Q5S1S4|CAH3_PIG	8;1	8;1	8;1	sp|Q5S1S4|CAH3_PIG Carbonic anhydrase 3 OS=Sus scrofa OX=9823 GN=CA3 PE=2 SV=3	Carbonic anhydrase 3	CA3	Sus scrofa	2	8	8	8	8	7	5	5	4	4	8	7	5	5	4	4	8	7	5	5	4	4	41.5	41.5	41.5	29.411	260	260;260	2022-12-03	8	7	5	5	5	4	0	66.231	By MS/MS	By MS/MS	By MS/MS
P16152	sp|P16152|CBR1_HUMAN;sp|Q28960|CBR1_PIG	sp|P16152|CBR1_HUMAN;sp|Q28960|CBR1_PIG	2;1	2;1	1;1	sp|P16152|CBR1_HUMAN Carbonyl reductase [NADPH] 1 OS=Homo sapiens OX=9606 GN=CBR1 PE=1 SV=3;sp|Q28960|CBR1_PIG Carbonyl reductase [NADPH] 1 OS=Sus scrofa OX=9823 GN=CBR1 PE=1 SV=3	Carbonyl reductase [NADPH] 1	CBR1	Homo sapiens	2	2	2	1	2	2	2	2	2	2	2	2	2	2	2	2	1	1	1	1	1	1	2022-02-11	2022-02-11	2022-04-05	30.375	277	277;289	2022-05-03	2	2	2	2	2	2	0	20.746	By MS/MS	By MS/MS	By MS/MS
P68400	sp|P68400|CSK21_HUMAN;sp|Q8NEV1|CSK23_HUMAN	sp|P68400|CSK21_HUMAN;sp|Q8NEV1|CSK23_HUMAN	5;4	5;4	5;4	sp|P68400|CSK21_HUMAN Casein kinase II subunit alpha OS=Homo sapiens OX=9606 GN=CSNK2A1 PE=1 SV=1;sp|Q8NEV1|CSK23_HUMAN Casein kinase II subunit alpha 3 OS=Homo sapiens OX=9606 GN=CSNK2A3 PE=1 SV=2	Casein kinase II subunit alpha	CSNK2A1	Homo sapiens	2	5	5	5	5	5	5	5	5	5	5	5	5	5	5	5	5	5	5	5	5	5	2022-09-18	2022-09-18	2022-09-18	45.143	391	391;391	2022-05-03	5	5	5	5	5	5	0	69.23	By MS/MS	By MS/MS	By MS/MS
O62839	sp|O62839|CATA_PIG	sp|O62839|CATA_PIG	1	1	1	sp|O62839|CATA_PIG Catalase OS=Sus scrofa OX=9823 GN=CAT PE=1 SV=4	Catalase	CAT	Sus scrofa	1	1	1	1	0	1	1	1	1	1	0	1	1	1	1	1	0	1	1	1	1	1	2022-05-02	2022-05-02	2022-05-02	59.771	527	527	4		1	1	1	1	1	0	16.599		By MS/MS	By matching
Q99028	sp|Q99028|COMT_PIG;sp|P21964|COMT_HUMAN	sp|Q99028|COMT_PIG;sp|P21964|COMT_HUMAN	5;3	5;3	5;3	sp|Q99028|COMT_PIG Catechol O-methyltransferase (Fragment) OS=Sus scrofa OX=9823 GN=COMT PE=1 SV=1;sp|P21964|COMT_HUMAN Catechol O-methyltransferase OS=Homo sapiens OX=9606 GN=COMT PE=1 SV=2	Catechol O-methyltransferase (Fragment)	COMT	Sus scrofa	2	5	5	5	5	5	3	4	4	4	5	5	3	4	4	4	5	5	3	4	4	4	35.5	35.5	35.5	20.587	186	186;271	2022-03-01	6	6	3	4	4	4	0	44.912	By MS/MS	By MS/MS	By MS/MS
P35221	sp|P35221|CTNA1_HUMAN;sp|P26232|CTNA2_HUMAN	sp|P35221|CTNA1_HUMAN;sp|P26232|CTNA2_HUMAN	2;1	2;1	2;1	sp|P35221|CTNA1_HUMAN Catenin alpha-1 OS=Homo sapiens OX=9606 GN=CTNNA1 PE=1 SV=1;sp|P26232|CTNA2_HUMAN Catenin alpha-2 OS=Homo sapiens OX=9606 GN=CTNNA2 PE=1 SV=5	Catenin alpha-1	CTNNA1	Homo sapiens	2	2	2	2	2	2	2	1	2	2	2	2	2	1	2	2	2	2	2	1	2	2	2022-02-03	2022-02-03	2022-02-03	100.07	906	906;953	1945-03-01	2	2	2	1	2	2	0	21.693	By matching	By MS/MS	By MS/MS
P35222	sp|P35222|CTNB1_HUMAN;sp|Q8WNW3|PLAK_PIG;sp|P14923|PLAK_HUMAN	sp|P35222|CTNB1_HUMAN	6;1;1	6;1;1	6;1;1	sp|P35222|CTNB1_HUMAN Catenin beta-1 OS=Homo sapiens OX=9606 GN=CTNNB1 PE=1 SV=1	Catenin beta-1	CTNNB1	Homo sapiens	3	6	6	6	5	5	4	3	4	5	5	5	4	3	4	5	5	5	4	3	4	5	2022-02-13	2022-02-13	2022-02-13	85.496	781	781;745;745	1942-03-01	5	5	4	3	4	5	0	46.908	By MS/MS	By MS/MS	By MS/MS
P15175	sp|P15175|ICTL_PIG;sp|P32195|PG2_PIG;sp|P49934|PG5_PIG;sp|P49933|PG4_PIG;sp|P32196|PG3_PIG;sp|P32194|PG1_PIG;sp|P49930|PMP23_PIG;sp|P49931|PMP36_PIG;sp|P49932|PMP37_PIG;sp|P80054|PR39_PIG;sp|P51524|PF11_PIG;sp|P51525|PF12_PIG	sp|P15175|ICTL_PIG;sp|P32195|PG2_PIG;sp|P49934|PG5_PIG;sp|P49933|PG4_PIG;sp|P32196|PG3_PIG;sp|P32194|PG1_PIG;sp|P49930|PMP23_PIG;sp|P49931|PMP36_PIG;sp|P49932|PMP37_PIG;sp|P80054|PR39_PIG;sp|P51524|PF11_PIG;sp|P51525|PF12_PIG	1;1;1;1;1;1;1;1;1;1;1;1	1;1;1;1;1;1;1;1;1;1;1;1	1;1;1;1;1;1;1;1;1;1;1;1	sp|P15175|ICTL_PIG Cathelin OS=Sus scrofa OX=9823 PE=1 SV=2;sp|P32195|PG2_PIG Protegrin-2 OS=Sus scrofa OX=9823 GN=NPG2 PE=1 SV=2;sp|P49934|PG5_PIG Protegrin-5 OS=Sus scrofa OX=9823 GN=NPG5 PE=1 SV=1;sp|P49933|PG4_PIG Protegrin-4 OS=Sus scrofa OX=9823 GN=N	Cathelin		Sus scrofa	12	1	1	1	1	1	1	1	1	1	1	1	1	1	1	1	1	1	1	1	1	1	2022-05-12	2022-05-12	2022-05-12	1985-10-01	96	96;147;149;149;149;149;153;166;167;172;212;228	2022-05-03	1	1	1	1	1	1	0	44.95	By MS/MS	By matching	By MS/MS
P00795	sp|P00795|CATD_PIG;sp|P07339|CATD_HUMAN	sp|P00795|CATD_PIG	4;1	4;1	4;1	sp|P00795|CATD_PIG Cathepsin D OS=Sus scrofa OX=9823 GN=CTSD PE=1 SV=2	Cathepsin D	CTSD	Sus scrofa	2	4	4	4	4	4	4	4	4	4	4	4	4	4	4	4	4	4	4	4	4	4	2022-04-19	2022-04-19	2022-04-19	37.294	345	345;412	1958-03-01	5	5	6	6	5	6	0	34.552	By MS/MS	By MS/MS	By MS/MS
Q6RVA9	sp|Q6RVA9|CAV1_PIG;sp|Q03135|CAV1_HUMAN	sp|Q6RVA9|CAV1_PIG;sp|Q03135|CAV1_HUMAN	1;1	1;1	1;1	sp|Q6RVA9|CAV1_PIG Caveolin-1 OS=Sus scrofa OX=9823 GN=CAV1 PE=2 SV=1;sp|Q03135|CAV1_HUMAN Caveolin-1 OS=Homo sapiens OX=9606 GN=CAV1 PE=1 SV=4	Caveolin-1	CAV1	Sus scrofa	2	1	1	1	1	1	1	1	1	1	1	1	1	1	1	1	1	1	1	1	1	1	2022-08-11	2022-08-11	2022-08-11	20.625	178	178;178	2022-05-03	1	1	1	1	1	1	0.0043384	67.872	By MS/MS	By MS/MS	By MS/MS
P16070	sp|P16070|CD44_HUMAN	sp|P16070|CD44_HUMAN	1	1	1	sp|P16070|CD44_HUMAN CD44 antigen OS=Homo sapiens OX=9606 GN=CD44 PE=1 SV=3	CD44 antigen	CD44	Homo sapiens	1	1	1	1	1	1	1	1	1	1	1	1	1	1	1	1	1	1	1	1	1	1	2022-03-01	2022-03-01	2022-03-01	81.537	742	742	1944-03-01	1	2	2	1	2	1	0.003367	71.739	By MS/MS	By MS/MS	By MS/MS
O62680	sp|O62680|CD59_PIG	sp|O62680|CD59_PIG	1	1	1	sp|O62680|CD59_PIG CD59 glycoprotein OS=Sus scrofa OX=9823 GN=CD59 PE=1 SV=1	CD59 glycoprotein	CD59	Sus scrofa	1	1	1	1	1	1	1	1	1	1	1	1	1	1	1	1	1	1	1	1	1	1	2022-09-08	2022-09-08	2022-09-08	13.79	123	123	2022-05-03	1	1	1	1	1	1	0	44.232	By MS/MS	By MS/MS	By MS/MS
Q9NZ45	sp|Q9NZ45|CISD1_HUMAN	sp|Q9NZ45|CISD1_HUMAN	1	1	1	sp|Q9NZ45|CISD1_HUMAN CDGSH iron-sulfur domain-containing protein 1 OS=Homo sapiens OX=9606 GN=CISD1 PE=1 SV=1	CDGSH iron-sulfur domain-containing protein 1	CISD1	Homo sapiens	1	1	1	1	1	1	1	1	1	1	1	1	1	1	1	1	1	1	1	1	1	1	2022-09-13	2022-09-13	2022-09-13	12.199	108	108	2022-05-03	1	1	1	1	1	1	0	58.51	By MS/MS	By MS/MS	By MS/MS
Q8N5K1	sp|Q8N5K1|CISD2_HUMAN	sp|Q8N5K1|CISD2_HUMAN	1	1	1	sp|Q8N5K1|CISD2_HUMAN CDGSH iron-sulfur domain-containing protein 2 OS=Homo sapiens OX=9606 GN=CISD2 PE=1 SV=1	CDGSH iron-sulfur domain-containing protein 2	CISD2	Homo sapiens	1	1	1	1	1	1	1	1	1	1	1	1	1	1	1	1	1	1	1	1	1	1	2022-01-11	2022-01-11	2022-01-11	15.278	135	135	2022-05-03	1	1	1	1	1	1	0.0024067	8.191	By matching	By MS/MS	By matching
Q9BY67	sp|Q9BY67|CADM1_HUMAN	sp|Q9BY67|CADM1_HUMAN	10	10	10	sp|Q9BY67|CADM1_HUMAN Cell adhesion molecule 1 OS=Homo sapiens OX=9606 GN=CADM1 PE=1 SV=2	Cell adhesion molecule 1	CADM1	Homo sapiens	1	10	10	10	9	9	9	9	9	9	9	9	9	9	9	9	9	9	9	9	9	9	2022-06-29	2022-06-29	2022-06-29	48.509	442	442	1958-03-01	12	13	11	13	13	14	0	231.86	By MS/MS	By MS/MS	By MS/MS
Q8N3J6	sp|Q8N3J6|CADM2_HUMAN	sp|Q8N3J6|CADM2_HUMAN	4	4	4	sp|Q8N3J6|CADM2_HUMAN Cell adhesion molecule 2 OS=Homo sapiens OX=9606 GN=CADM2 PE=2 SV=1	Cell adhesion molecule 2	CADM2	Homo sapiens	1	4	4	4	4	4	4	4	4	4	4	4	4	4	4	4	4	4	4	4	4	4	2022-09-18	2022-09-18	2022-09-18	47.553	435	435	2022-05-03	6	6	6	6	6	6	0	60.872	By MS/MS	By MS/MS	By MS/MS
Q29026	sp|Q29026|CEND_PIG	sp|Q29026|CEND_PIG	2	2	2	sp|Q29026|CEND_PIG Cell cycle exit and neuronal differentiation protein 1 OS=Sus scrofa OX=9823 GN=CEND1 PE=1 SV=1	Cell cycle exit and neuronal differentiation protein 1	CEND1	Sus scrofa	1	2	2	2	2	2	2	1	2	2	2	2	2	1	2	2	2	2	2	1	2	2	33.6	33.6	33.6	13.968	140	140	1945-03-01	2	2	2	1	2	2	0	69.118	By MS/MS	By MS/MS	By MS/MS
Q007T2	sp|Q007T2|CDC42_PIG;sp|P60953|CDC42_HUMAN;sp|P84095|RHOG_HUMAN;sp|P17081|RHOQ_HUMAN;sp|Q9H4E5|RHOJ_HUMAN	sp|Q007T2|CDC42_PIG;sp|P60953|CDC42_HUMAN	5;5;1;1;1	5;5;1;1;1	4;4;0;0;0	sp|Q007T2|CDC42_PIG Cell division control protein 42 homolog OS=Sus scrofa OX=9823 GN=CDC42 PE=2 SV=2;sp|P60953|CDC42_HUMAN Cell division control protein 42 homolog OS=Homo sapiens OX=9606 GN=CDC42 PE=1 SV=2	Cell division control protein 42 homolog	CDC42	Sus scrofa	5	5	5	4	4	5	2	3	3	3	4	5	2	3	3	3	3	4	2	2	2	2	2022-03-29	2022-03-29	2022-06-23	21.258	191	191;191;191;205;214	2025-03-01	4	5	2	3	3	3	0	56.819	By MS/MS	By MS/MS	By MS/MS
P29762	sp|P29762|RABP1_HUMAN	sp|P29762|RABP1_HUMAN	7	7	7	sp|P29762|RABP1_HUMAN Cellular retinoic acid-binding protein 1 OS=Homo sapiens OX=9606 GN=CRABP1 PE=1 SV=2	Cellular retinoic acid-binding protein 1	CRABP1	Homo sapiens	1	7	7	7	6	5	6	6	6	6	6	5	6	6	6	6	6	5	6	6	6	6	65	65	65	15.565	137	137	1967-03-01	6	5	6	8	7	7	0	138.47	By MS/MS	By MS/MS	By MS/MS
Q9H444	sp|Q9H444|CHM4B_HUMAN	sp|Q9H444|CHM4B_HUMAN	4	4	4	sp|Q9H444|CHM4B_HUMAN Charged multivesicular body protein 4b OS=Homo sapiens OX=9606 GN=CHMP4B PE=1 SV=1	Charged multivesicular body protein 4b	CHMP4B	Homo sapiens	1	4	4	4	4	4	4	4	4	4	4	4	4	4	4	4	4	4	4	4	4	4	2022-08-22	2022-08-22	2022-08-22	24.95	224	224	2022-05-03	4	4	4	4	4	4	0	27.265	By MS/MS	By MS/MS	By MS/MS
O00299	sp|O00299|CLIC1_HUMAN	sp|O00299|CLIC1_HUMAN	2	2	2	sp|O00299|CLIC1_HUMAN Chloride intracellular channel protein 1 OS=Homo sapiens OX=9606 GN=CLIC1 PE=1 SV=4	Chloride intracellular channel protein 1	CLIC1	Homo sapiens	1	2	2	2	2	2	2	2	2	2	2	2	2	2	2	2	2	2	2	2	2	2	2022-04-12	2022-04-12	2022-04-12	26.922	241	241	2022-05-03	2	2	2	2	2	2	0	11.863	By MS/MS	By MS/MS	By MS/MS
Q9Y696	sp|Q9Y696|CLIC4_HUMAN	sp|Q9Y696|CLIC4_HUMAN	2	2	2	sp|Q9Y696|CLIC4_HUMAN Chloride intracellular channel protein 4 OS=Homo sapiens OX=9606 GN=CLIC4 PE=1 SV=4	Chloride intracellular channel protein 4	CLIC4	Homo sapiens	1	2	2	2	2	2	2	1	2	2	2	2	2	1	2	2	2	2	2	1	2	2	2022-01-11	2022-01-11	2022-01-11	28.772	253	253	1945-03-01	2	2	2	1	2	2	0	13.592	By MS/MS	By MS/MS	By MS/MS
F1S584	sp|F1S584|CTL2_PIG	sp|F1S584|CTL2_PIG	1	1	1	sp|F1S584|CTL2_PIG Choline transporter-like protein 2 OS=Sus scrofa OX=9823 GN=SLC44A2 PE=3 SV=1	Choline transporter-like protein 2	SLC44A2	Sus scrofa	1	1	1	1	1	1	1	1	1	1	1	1	1	1	1	1	1	1	1	1	1	1	2022-07-01	2022-07-01	2022-07-01	80.237	706	706	2022-05-03	1	1	1	1	1	1	0.002381	8.012	By MS/MS	By MS/MS	By MS/MS
P83916	sp|P83916|CBX1_HUMAN	sp|P83916|CBX1_HUMAN	3	2	2	sp|P83916|CBX1_HUMAN Chromobox protein homolog 1 OS=Homo sapiens OX=9606 GN=CBX1 PE=1 SV=1	Chromobox protein homolog 1	CBX1	Homo sapiens	1	3	2	2	2	3	3	3	3	2	1	2	2	2	2	2	1	2	2	2	2	2	2022-03-24	2022-07-15	2022-07-15	21.418	185	185	1973-03-01	1	2	2	2	2	2	0	19.587	By MS/MS	By MS/MS	By MS/MS
Q13185	sp|Q13185|CBX3_HUMAN;sp|P45973|CBX5_HUMAN	sp|Q13185|CBX3_HUMAN	5;1	5;1	4;1	sp|Q13185|CBX3_HUMAN Chromobox protein homolog 3 OS=Homo sapiens OX=9606 GN=CBX3 PE=1 SV=4	Chromobox protein homolog 3	CBX3	Homo sapiens	2	5	5	4	5	5	5	3	4	3	5	5	5	3	4	3	4	4	4	2	3	3	2022-05-29	2022-05-29	2022-08-20	20.811	183	183;191	2022-02-03	5	5	5	3	4	3	0	67.479	By MS/MS	By MS/MS	By MS/MS
P00889	sp|P00889|CISY_PIG;sp|O75390|CISY_HUMAN	sp|P00889|CISY_PIG;sp|O75390|CISY_HUMAN	4;2	4;2	4;2	sp|P00889|CISY_PIG Citrate synthase, mitochondrial OS=Sus scrofa OX=9823 GN=CS PE=1 SV=2;sp|O75390|CISY_HUMAN Citrate synthase, mitochondrial OS=Homo sapiens OX=9606 GN=CS PE=1 SV=2	Citrate synthase, mitochondrial	CS	Sus scrofa	2	4	4	4	4	4	3	4	4	3	4	4	3	4	4	3	4	4	3	4	4	3	19	19	19	51.629	464	464;466	1942-03-01	4	5	3	4	5	3	0	80.005	By MS/MS	By MS/MS	By MS/MS
O60641	sp|O60641|AP180_HUMAN	sp|O60641|AP180_HUMAN	6	6	5	sp|O60641|AP180_HUMAN Clathrin coat assembly protein AP180 OS=Homo sapiens OX=9606 GN=SNAP91 PE=1 SV=2	Clathrin coat assembly protein AP180	SNAP91	Homo sapiens	1	6	6	5	5	5	6	6	6	6	5	5	6	6	6	6	4	4	5	5	5	5	2022-06-08	2022-06-08	2022-03-07	92.501	907	907	1962-03-01	5	5	6	6	6	6	0	102.97	By MS/MS	By MS/MS	By MS/MS
Q00610	sp|Q00610|CLH1_HUMAN	sp|Q00610|CLH1_HUMAN	54	54	42	sp|Q00610|CLH1_HUMAN Clathrin heavy chain 1 OS=Homo sapiens OX=9606 GN=CLTC PE=1 SV=5	Clathrin heavy chain 1	CLTC	Homo sapiens	1	54	54	42	53	54	52	50	51	50	53	54	52	50	51	50	42	42	41	40	40	40	45.1	45.1	37.6	191.61	1675	1675	1947-03-01	68	71	68	67	67	65	0	323.31	By MS/MS	By MS/MS	By MS/MS
P53675	sp|P53675|CLH2_HUMAN	sp|P53675|CLH2_HUMAN	13	1	1	sp|P53675|CLH2_HUMAN Clathrin heavy chain 2 OS=Homo sapiens OX=9606 GN=CLTCL1 PE=1 SV=2	Clathrin heavy chain 2	CLTCL1	Homo sapiens	1	13	1	1	12	13	12	11	12	11	1	1	1	1	1	1	1	1	1	1	1	1	2022-04-08	0.7	0.7	187.03	1640	1640	2022-05-03	1	1	1	1	1	1	0.0023229	76.243	By MS/MS	By MS/MS	By MS/MS
P09497	sp|P09497|CLCB_HUMAN	sp|P09497|CLCB_HUMAN	2	2	2	sp|P09497|CLCB_HUMAN Clathrin light chain B OS=Homo sapiens OX=9606 GN=CLTB PE=1 SV=1	Clathrin light chain B	CLTB	Homo sapiens	1	2	2	2	2	2	2	2	1	1	2	2	2	2	1	1	2	2	2	2	1	1	14	14	14	25.19	229	229	2022-01-03	2	2	2	2	1	1	0	17.071	By MS/MS	By MS/MS	By MS/MS
O43809	sp|O43809|CPSF5_HUMAN	sp|O43809|CPSF5_HUMAN	2	2	2	sp|O43809|CPSF5_HUMAN Cleavage and polyadenylation specificity factor subunit 5 OS=Homo sapiens OX=9606 GN=NUDT21 PE=1 SV=1	Cleavage and polyadenylation specificity factor subunit 5	NUDT21	Homo sapiens	1	2	2	2	1	1	1	2	1	1	1	1	1	2	1	1	1	1	1	2	1	1	2022-09-07	2022-09-07	2022-09-07	26.227	227	227	1957-03-01	1	1	1	2	1	1	0	14.617	By MS/MS	By MS/MS	By MS/MS
O75122	sp|O75122|CLAP2_HUMAN	sp|O75122|CLAP2_HUMAN	1	1	1	sp|O75122|CLAP2_HUMAN CLIP-associating protein 2 OS=Homo sapiens OX=9606 GN=CLASP2 PE=1 SV=3	CLIP-associating protein 2	CLASP2	Homo sapiens	1	1	1	1	1	1	1	1	1	1	1	1	1	1	1	1	1	1	1	1	1	1	2022-02-01	2022-02-01	2022-02-01	141.06	1294	1294	2022-05-03	1	1	1	1	1	1	0.0034247	73.479	By matching	By MS/MS	By matching
P53621	sp|P53621|COPA_HUMAN	sp|P53621|COPA_HUMAN	2	2	2	sp|P53621|COPA_HUMAN Coatomer subunit alpha OS=Homo sapiens OX=9606 GN=COPA PE=1 SV=2	Coatomer subunit alpha	COPA	Homo sapiens	1	2	2	2	2	2	2	2	1	1	2	2	2	2	1	1	2	2	2	2	1	1	2022-02-02	2022-02-02	2022-02-02	138.34	1224	1224	2022-01-03	2	2	2	2	1	1	0	11.665	By MS/MS	By matching	By MS/MS
P61923	sp|P61923|COPZ1_HUMAN	sp|P61923|COPZ1_HUMAN	1	1	1	sp|P61923|COPZ1_HUMAN Coatomer subunit zeta-1 OS=Homo sapiens OX=9606 GN=COPZ1 PE=1 SV=1	Coatomer subunit zeta-1	COPZ1	Homo sapiens	1	1	1	1	1	1	1	1	1	0	1	1	1	1	1	0	1	1	1	1	1	0	2022-07-10	2022-07-10	2022-07-10	20.198	177	177	3	1	1	1	1	1		0.0042965	6.723	By MS/MS	By MS/MS	By matching
P10668	sp|P10668|COF1_PIG;sp|P23528|COF1_HUMAN	sp|P10668|COF1_PIG;sp|P23528|COF1_HUMAN	9;8	9;8	8;7	sp|P10668|COF1_PIG Cofilin-1 OS=Sus scrofa OX=9823 GN=CFL1 PE=1 SV=3;sp|P23528|COF1_HUMAN Cofilin-1 OS=Homo sapiens OX=9606 GN=CFL1 PE=1 SV=3	Cofilin-1	CFL1	Sus scrofa	2	9	9	8	9	9	9	9	9	9	9	9	9	9	9	9	8	8	8	8	8	8	64.5	64.5	57.8	18.518	166	166;166	1946-03-01	14	14	13	15	13	13	0	323.31	By MS/MS	By MS/MS	By MS/MS
Q9Y281	sp|Q9Y281|COF2_HUMAN;sp|Q5G6V9|COF2_PIG	sp|Q9Y281|COF2_HUMAN;sp|Q5G6V9|COF2_PIG	3;3	2;2	2;2	sp|Q9Y281|COF2_HUMAN Cofilin-2 OS=Homo sapiens OX=9606 GN=CFL2 PE=1 SV=1;sp|Q5G6V9|COF2_PIG Cofilin-2 OS=Sus scrofa OX=9823 GN=CFL2 PE=2 SV=4	Cofilin-2	CFL2	Homo sapiens	2	3	2	2	3	3	3	3	3	3	2	2	2	2	2	2	2	2	2	2	2	2	2022-01-27	2022-05-20	2022-05-20	18.736	166	166;166	2022-05-03	2	2	2	2	2	2	0	45.123	By MS/MS	By MS/MS	By MS/MS
Q7Z3E2	sp|Q7Z3E2|CC186_HUMAN	sp|Q7Z3E2|CC186_HUMAN	1	1	1	sp|Q7Z3E2|CC186_HUMAN Coiled-coil domain-containing protein 186 OS=Homo sapiens OX=9606 GN=CCDC186 PE=1 SV=2	Coiled-coil domain-containing protein 186	CCDC186	Homo sapiens	1	1	1	1	1	1	1	1	1	1	1	1	1	1	1	1	1	1	1	1	1	1	0.9	0.9	0.9	103.69	898	898	2022-05-03	1	1	1	1	1	1	0.0024783	90.434	By MS/MS	By matching	By matching
Q14011	sp|Q14011|CIRBP_HUMAN	sp|Q14011|CIRBP_HUMAN	3	3	3	sp|Q14011|CIRBP_HUMAN Cold-inducible RNA-binding protein OS=Homo sapiens OX=9606 GN=CIRBP PE=1 SV=1	Cold-inducible RNA-binding protein	CIRBP	Homo sapiens	1	3	3	3	2	3	3	3	3	3	2	3	3	3	3	3	2	3	3	3	3	3	2022-07-26	2022-07-26	2022-07-26	18.648	172	172	1984-03-01	2	3	3	3	4	4	0	25.051	By MS/MS	By MS/MS	By MS/MS
Q8WVH0	sp|Q8WVH0|CPLX3_HUMAN	sp|Q8WVH0|CPLX3_HUMAN	2	2	2	sp|Q8WVH0|CPLX3_HUMAN Complexin-3 OS=Homo sapiens OX=9606 GN=CPLX3 PE=2 SV=1	Complexin-3	CPLX3	Homo sapiens	1	2	2	2	2	2	2	2	2	2	2	2	2	2	2	2	2	2	2	2	2	2	2022-08-22	2022-08-22	2022-08-22	17.556	158	158	2022-05-03	2	2	2	2	2	2	0	23.461	By MS/MS	By MS/MS	By MS/MS
Q7Z7G2	sp|Q7Z7G2|CPLX4_HUMAN	sp|Q7Z7G2|CPLX4_HUMAN	1	1	1	sp|Q7Z7G2|CPLX4_HUMAN Complexin-4 OS=Homo sapiens OX=9606 GN=CPLX4 PE=1 SV=1	Complexin-4	CPLX4	Homo sapiens	1	1	1	1	1	1	1	1	1	1	1	1	1	1	1	1	1	1	1	1	1	1	2022-04-14	2022-04-14	2022-04-14	18.336	160	160	2022-06-03	1	2	2	2	1	2	0	14.977	By matching	By MS/MS	By MS/MS
P51160	sp|P51160|PDE6C_HUMAN	sp|P51160|PDE6C_HUMAN	1	1	1	sp|P51160|PDE6C_HUMAN Cone cGMP-specific 3,5-cyclic phosphodiesterase subunit alpha OS=Homo sapiens OX=9606 GN=PDE6C PE=1 SV=2	Cone cGMP-specific 3,5-cyclic phosphodiesterase subunit alpha	PDE6C	Homo sapiens	1	1	1	1	0	1	1	1	1	1	0	1	1	1	1	1	0	1	1	1	1	1	2022-09-01	2022-09-01	2022-09-01	99.146	858	858	4		1	1	1	1	1	0.0074468	66.119		By MS/MS	By MS/MS
Q12860	sp|Q12860|CNTN1_HUMAN	sp|Q12860|CNTN1_HUMAN	2	2	2	sp|Q12860|CNTN1_HUMAN Contactin-1 OS=Homo sapiens OX=9606 GN=CNTN1 PE=1 SV=1	Contactin-1	CNTN1	Homo sapiens	1	2	2	2	2	2	1	1	1	1	2	2	1	1	1	1	2	2	1	1	1	1	2022-03-03	2022-03-03	2022-03-03	113.32	1018	1018	2022-05-03	2	2	1	1	2	2	0	12.848	By matching	By MS/MS	By matching
P61201	sp|P61201|CSN2_HUMAN	sp|P61201|CSN2_HUMAN	1	1	1	sp|P61201|CSN2_HUMAN COP9 signalosome complex subunit 2 OS=Homo sapiens OX=9606 GN=COPS2 PE=1 SV=1	COP9 signalosome complex subunit 2	COPS2	Homo sapiens	1	1	1	1	1	1	1	1	1	1	1	1	1	1	1	1	1	1	1	1	1	1	2022-04-03	2022-04-03	2022-04-03	51.596	443	443	2022-05-03	1	1	1	1	1	1	0.0023175	75.769	By MS/MS	By MS/MS	By MS/MS
Q9BT78	sp|Q9BT78|CSN4_HUMAN;sp|A7Y521|CSN4_PIG	sp|Q9BT78|CSN4_HUMAN;sp|A7Y521|CSN4_PIG	7;7	7;7	7;7	sp|Q9BT78|CSN4_HUMAN COP9 signalosome complex subunit 4 OS=Homo sapiens OX=9606 GN=COPS4 PE=1 SV=1;sp|A7Y521|CSN4_PIG COP9 signalosome complex subunit 4 OS=Sus scrofa OX=9823 GN=COPS4 PE=2 SV=1	COP9 signalosome complex subunit 4	COPS4	Homo sapiens	2	7	7	7	6	7	5	4	4	4	6	7	5	4	4	4	6	7	5	4	4	4	2022-04-26	2022-04-26	2022-04-26	46.268	406	406;406	2017-03-01	6	7	5	4	4	4	0	44.557	By MS/MS	By MS/MS	By MS/MS
A7TX81	sp|A7TX81|CSN6_PIG;sp|Q7L5N1|CSN6_HUMAN	sp|A7TX81|CSN6_PIG;sp|Q7L5N1|CSN6_HUMAN	3;2	3;2	3;2	sp|A7TX81|CSN6_PIG COP9 signalosome complex subunit 6 OS=Sus scrofa OX=9823 GN=COPS6 PE=2 SV=1;sp|Q7L5N1|CSN6_HUMAN COP9 signalosome complex subunit 6 OS=Homo sapiens OX=9606 GN=COPS6 PE=1 SV=1	COP9 signalosome complex subunit 6	COPS6	Sus scrofa	2	3	3	3	3	3	3	2	2	2	3	3	3	2	2	2	3	3	3	2	2	2	2022-06-13	2022-06-13	2022-06-13	35.865	323	323;327	2022-02-03	3	3	3	2	2	2	0	17.043	By MS/MS	By MS/MS	By MS/MS
O75367	sp|O75367|H2AY_HUMAN	sp|O75367|H2AY_HUMAN	2	2	2	sp|O75367|H2AY_HUMAN Core histone macro-H2A.1 OS=Homo sapiens OX=9606 GN=MACROH2A1 PE=1 SV=4	Core histone macro-H2A.1	MACROH2A1	Homo sapiens	1	2	2	2	1	2	2	2	2	2	1	2	2	2	2	2	1	2	2	2	2	2	2022-03-11	2022-03-11	2022-03-11	39.617	372	372	1973-03-01	1	2	2	2	2	2	0	1964-12-01	By MS/MS	By MS/MS	By matching
Q9BR76	sp|Q9BR76|COR1B_HUMAN	sp|Q9BR76|COR1B_HUMAN	2	2	2	sp|Q9BR76|COR1B_HUMAN Coronin-1B OS=Homo sapiens OX=9606 GN=CORO1B PE=1 SV=1	Coronin-1B	CORO1B	Homo sapiens	1	2	2	2	1	2	2	1	1	1	1	2	2	1	1	1	1	2	2	1	1	1	2022-05-04	2022-05-04	2022-05-04	54.234	489	489	2025-03-01	1	2	2	1	1	1	0.0013123	1949-11-01	By matching	By MS/MS	By MS/MS
Q29594	sp|Q29594|KCRB_PIG;sp|P12277|KCRB_HUMAN	sp|Q29594|KCRB_PIG;sp|P12277|KCRB_HUMAN	19;12	19;12	17;10	sp|Q29594|KCRB_PIG Creatine kinase B-type OS=Sus scrofa OX=9823 GN=CKB PE=2 SV=2;sp|P12277|KCRB_HUMAN Creatine kinase B-type OS=Homo sapiens OX=9606 GN=CKB PE=1 SV=1	Creatine kinase B-type	CKB	Sus scrofa	2	19	19	17	18	19	19	18	18	18	18	19	19	18	18	18	17	17	17	17	17	17	66.4	66.4	64.3	42.657	381	381;381	1951-03-01	72	76	84	77	80	72	0	323.31	By MS/MS	By MS/MS	By MS/MS
Q5XLD3	sp|Q5XLD3|KCRM_PIG;sp|P06732|KCRM_HUMAN	sp|Q5XLD3|KCRM_PIG;sp|P06732|KCRM_HUMAN	3;3	1;1	1;1	sp|Q5XLD3|KCRM_PIG Creatine kinase M-type OS=Sus scrofa OX=9823 GN=CKM PE=2 SV=1;sp|P06732|KCRM_HUMAN Creatine kinase M-type OS=Homo sapiens OX=9606 GN=CKM PE=1 SV=2	Creatine kinase M-type	CKM	Sus scrofa	2	3	1	1	2	3	2	1	2	2	1	1	0	0	1	1	1	1	0	0	1	1	2022-02-09	2022-07-03	2022-07-03	43.059	381	381;381	3	2	1			1	1	0	30.644	By MS/MS	By MS/MS	By matching
P12532	sp|P12532|KCRU_HUMAN;sp|P17540|KCRS_HUMAN	sp|P12532|KCRU_HUMAN	10;2	1;0	1;0	sp|P12532|KCRU_HUMAN Creatine kinase U-type, mitochondrial OS=Homo sapiens OX=9606 GN=CKMT1A PE=1 SV=1	Creatine kinase U-type, mitochondrial	CKMT1A	Homo sapiens	2	10	1	1	9	9	9	10	10	10	1	1	1	1	1	1	1	1	1	1	1	1	34.3	2022-09-02	2022-09-02	47.036	417	417;419	1986-03-01	1	1	1	1	1	2	0.0023529	7.814	By MS/MS	By MS/MS	By MS/MS
Q29577	sp|Q29577|KCRU_PIG	sp|Q29577|KCRU_PIG	12	12	3	sp|Q29577|KCRU_PIG Creatine kinase U-type, mitochondrial OS=Sus scrofa OX=9823 GN=CKMT1 PE=2 SV=2	Creatine kinase U-type, mitochondrial	CKMT1	Sus scrofa	1	12	12	3	11	11	11	12	11	12	11	11	11	12	11	12	3	3	3	3	2	3	43	43	2022-05-11	46.949	416	416	1958-03-01	23	25	25	26	24	28	0	323.31	By MS/MS	By MS/MS	By MS/MS
Q13363	sp|Q13363|CTBP1_HUMAN	sp|Q13363|CTBP1_HUMAN	3	3	2	sp|Q13363|CTBP1_HUMAN C-terminal-binding protein 1 OS=Homo sapiens OX=9606 GN=CTBP1 PE=1 SV=2	C-terminal-binding protein 1	CTBP1	Homo sapiens	1	3	3	2	2	2	2	2	2	3	2	2	2	2	2	3	1	1	1	1	1	2	2022-01-09	2022-01-09	7	47.535	440	440	1963-03-01	3	3	3	3	3	4	0	17.522	By MS/MS	By MS/MS	By MS/MS
P56545	sp|P56545|CTBP2_HUMAN	sp|P56545|CTBP2_HUMAN	3	2	2	sp|P56545|CTBP2_HUMAN C-terminal-binding protein 2 OS=Homo sapiens OX=9606 GN=CTBP2 PE=1 SV=1	C-terminal-binding protein 2	CTBP2	Homo sapiens	1	3	2	2	3	3	3	3	2	2	2	2	2	2	1	1	2	2	2	2	1	1	2022-08-10	2022-08-08	2022-08-08	48.944	445	445	2022-01-03	2	2	2	2	1	1	0	11.932	By MS/MS	By MS/MS	By MS/MS
Q13618	sp|Q13618|CUL3_HUMAN	sp|Q13618|CUL3_HUMAN	4	4	4	sp|Q13618|CUL3_HUMAN Cullin-3 OS=Homo sapiens OX=9606 GN=CUL3 PE=1 SV=2	Cullin-3	CUL3	Homo sapiens	1	4	4	4	4	4	4	3	3	2	4	4	4	3	3	2	4	4	4	3	3	2	2022-07-07	2022-07-07	2022-07-07	88.929	768	768	2014-03-01	4	4	5	3	3	2	0	33.936	By MS/MS	By MS/MS	By MS/MS
Q86VP6	sp|Q86VP6|CAND1_HUMAN	sp|Q86VP6|CAND1_HUMAN	14	14	14	sp|Q86VP6|CAND1_HUMAN Cullin-associated NEDD8-dissociated protein 1 OS=Homo sapiens OX=9606 GN=CAND1 PE=1 SV=2	Cullin-associated NEDD8-dissociated protein 1	CAND1	Homo sapiens	1	14	14	14	12	13	13	14	13	13	12	13	13	14	13	13	12	13	13	14	13	13	2022-06-14	2022-06-14	2022-06-14	136.37	1230	1230	1954-03-01	13	14	14	15	14	14	0	96.888	By MS/MS	By MS/MS	By MS/MS
Q29290	sp|Q29290|CYTB_PIG	sp|Q29290|CYTB_PIG	2	2	2	sp|Q29290|CYTB_PIG Cystatin-B OS=Sus scrofa OX=9823 GN=CSTB PE=1 SV=1	Cystatin-B	CSTB	Sus scrofa	1	2	2	2	2	2	2	2	1	1	2	2	2	2	1	1	2	2	2	2	1	1	33.7	33.7	33.7	2013-11-01	98	98	2018-03-01	2	2	2	3	1	1	0	12.962	By MS/MS	By MS/MS	By MS/MS
P21291	sp|P21291|CSRP1_HUMAN	sp|P21291|CSRP1_HUMAN	4	4	4	sp|P21291|CSRP1_HUMAN Cysteine and glycine-rich protein 1 OS=Homo sapiens OX=9606 GN=CSRP1 PE=1 SV=3	Cysteine and glycine-rich protein 1	CSRP1	Homo sapiens	1	4	4	4	3	4	4	2	3	3	3	4	4	2	3	3	3	4	4	2	3	3	2022-06-30	2022-06-30	2022-06-30	20.567	193	193	1937-03-01	3	4	4	2	3	3	0	28.338	By MS/MS	By MS/MS	By MS/MS
A9YUB1	sp|A9YUB1|CHRD1_PIG	sp|A9YUB1|CHRD1_PIG	2	2	2	sp|A9YUB1|CHRD1_PIG Cysteine and histidine-rich domain-containing protein 1 OS=Sus scrofa OX=9823 GN=CHORDC1 PE=2 SV=1	Cysteine and histidine-rich domain-containing protein 1	CHORDC1	Sus scrofa	1	2	2	2	2	2	2	2	2	2	2	2	2	2	2	2	2	2	2	2	2	2	2022-06-09	2022-06-09	2022-06-09	37.35	332	332	2022-05-03	2	2	2	2	2	2	0	13.062	By MS/MS	By MS/MS	By MS/MS
P00172	sp|P00172|CYB5_PIG;sp|P00167|CYB5_HUMAN	sp|P00172|CYB5_PIG;sp|P00167|CYB5_HUMAN	3;3	3;3	3;3	sp|P00172|CYB5_PIG Cytochrome b5 OS=Sus scrofa OX=9823 GN=CYB5A PE=1 SV=3;sp|P00167|CYB5_HUMAN Cytochrome b5 OS=Homo sapiens OX=9606 GN=CYB5A PE=1 SV=2	Cytochrome b5	CYB5A	Sus scrofa	2	3	3	3	3	3	3	3	2	2	3	3	3	3	2	2	3	3	3	3	2	2	34.3	34.3	34.3	15.31	134	134;134	2022-06-03	4	4	3	3	2	2	0	19.512	By MS/MS	By MS/MS	By MS/MS
P22695	sp|P22695|QCR2_HUMAN	sp|P22695|QCR2_HUMAN	1	1	1	sp|P22695|QCR2_HUMAN Cytochrome b-c1 complex subunit 2, mitochondrial OS=Homo sapiens OX=9606 GN=UQCRC2 PE=1 SV=3	Cytochrome b-c1 complex subunit 2, mitochondrial	UQCRC2	Homo sapiens	1	1	1	1	1	1	1	1	1	1	1	1	1	1	1	1	1	1	1	1	1	1	2022-05-03	2022-05-03	2022-05-03	48.442	453	453	2022-05-03	1	1	1	1	1	1	0	13.799	By MS/MS	By matching	By MS/MS
O79876	sp|O79876|COX1_PIG	sp|O79876|COX1_PIG	1	1	1	sp|O79876|COX1_PIG Cytochrome c oxidase subunit 1 OS=Sus scrofa OX=9823 GN=MT-CO1 PE=3 SV=2	Cytochrome c oxidase subunit 1	MT-CO1	Sus scrofa	1	1	1	1	1	1	1	1	1	1	1	1	1	1	1	1	1	1	1	1	1	1	2022-06-06	2022-06-06	2022-06-06	56.958	514	514	2022-05-03	1	1	1	1	1	1	0	13.032	By MS/MS	By MS/MS	By MS/MS
P50667	sp|P50667|COX2_PIG	sp|P50667|COX2_PIG	2	2	2	sp|P50667|COX2_PIG Cytochrome c oxidase subunit 2 OS=Sus scrofa OX=9823 GN=MT-CO2 PE=3 SV=1	Cytochrome c oxidase subunit 2	MT-CO2	Sus scrofa	1	2	2	2	2	1	1	1	1	1	2	1	1	1	1	1	2	1	1	1	1	1	2022-08-15	2022-08-15	2022-08-15	26.184	228	228	1931-03-01	3	2	2	2	2	2	0	13.315	By MS/MS	By MS/MS	By MS/MS
Q95283	sp|Q95283|COX41_PIG	sp|Q95283|COX41_PIG	1	1	1	sp|Q95283|COX41_PIG Cytochrome c oxidase subunit 4 isoform 1, mitochondrial (Fragment) OS=Sus scrofa OX=9823 GN=COX4I1 PE=2 SV=1	Cytochrome c oxidase subunit 4 isoform 1, mitochondrial (Fragment)	COX4I1	Sus scrofa	1	1	1	1	1	1	1	1	1	1	1	1	1	1	1	1	1	1	1	1	1	1	2022-04-12	2022-04-12	2022-04-12	10.825	97	97	2022-05-03	1	1	1	1	1	1	0.002445	85.419	By MS/MS	By MS/MS	By MS/MS
P08574	sp|P08574|CY1_HUMAN	sp|P08574|CY1_HUMAN	2	2	2	sp|P08574|CY1_HUMAN Cytochrome c1, heme protein, mitochondrial OS=Homo sapiens OX=9606 GN=CYC1 PE=1 SV=3	Cytochrome c1, heme protein, mitochondrial	CYC1	Homo sapiens	1	2	2	2	2	2	2	2	2	2	2	2	2	2	2	2	2	2	2	2	2	2	2022-01-11	2022-01-11	2022-01-11	35.422	325	325	2022-05-03	2	2	2	2	2	2	0	12.988	By MS/MS	By MS/MS	By MS/MS
Q14204	sp|Q14204|DYHC1_HUMAN	sp|Q14204|DYHC1_HUMAN	18	18	18	sp|Q14204|DYHC1_HUMAN Cytoplasmic dynein 1 heavy chain 1 OS=Homo sapiens OX=9606 GN=DYNC1H1 PE=1 SV=5	Cytoplasmic dynein 1 heavy chain 1	DYNC1H1	Homo sapiens	1	18	18	18	16	17	16	17	11	11	16	17	16	17	11	11	16	17	16	17	11	11	2022-07-05	2022-07-05	2022-07-05	532.4	4646	4646	2026-03-01	16	17	16	17	11	11	0	117.6	By MS/MS	By MS/MS	By MS/MS
O43237	sp|O43237|DC1L2_HUMAN	sp|O43237|DC1L2_HUMAN	1	1	1	sp|O43237|DC1L2_HUMAN Cytoplasmic dynein 1 light intermediate chain 2 OS=Homo sapiens OX=9606 GN=DYNC1LI2 PE=1 SV=1	Cytoplasmic dynein 1 light intermediate chain 2	DYNC1LI2	Homo sapiens	1	1	1	1	1	1	1	0	0	0	1	1	1	0	0	0	1	1	1	0	0	0	2022-05-03	2022-05-03	2022-05-03	54.099	492	492	2	1	1	1				0.0043573	68.148	By MS/MS	By MS/MS	By MS/MS
P28839	sp|P28839|AMPL_PIG;sp|P28838|AMPL_HUMAN	sp|P28839|AMPL_PIG	5;2	5;2	5;2	sp|P28839|AMPL_PIG Cytosol aminopeptidase OS=Sus scrofa OX=9823 GN=LAP3 PE=1 SV=2	Cytosol aminopeptidase	LAP3	Sus scrofa	2	5	5	5	5	5	5	4	5	5	5	5	5	4	5	5	5	5	5	4	5	5	2022-07-13	2022-07-13	2022-07-13	56.046	519	519;519	1949-03-01	6	6	6	5	6	6	0	33.127	By MS/MS	By MS/MS	By MS/MS
O00154	sp|O00154|BACH_HUMAN	sp|O00154|BACH_HUMAN	2	2	2	sp|O00154|BACH_HUMAN Cytosolic acyl coenzyme A thioester hydrolase OS=Homo sapiens OX=9606 GN=ACOT7 PE=1 SV=3	Cytosolic acyl coenzyme A thioester hydrolase	ACOT7	Homo sapiens	1	2	2	2	2	2	2	1	1	1	2	2	2	1	1	1	2	2	2	1	1	1	2022-05-09	2022-05-09	2022-05-09	41.796	380	380	3	2	2	2	1	1	1	0	19.905	By MS/MS	By MS/MS	By MS/MS
Q96KP4	sp|Q96KP4|CNDP2_HUMAN	sp|Q96KP4|CNDP2_HUMAN	2	2	2	sp|Q96KP4|CNDP2_HUMAN Cytosolic non-specific dipeptidase OS=Homo sapiens OX=9606 GN=CNDP2 PE=1 SV=2	Cytosolic non-specific dipeptidase	CNDP2	Homo sapiens	1	2	2	2	2	1	2	2	2	2	2	1	2	2	2	2	2	1	2	2	2	2	2022-06-07	2022-06-07	2022-06-07	52.878	475	475	1931-03-01	3	2	2	2	2	2	0	14.779	By MS/MS	By MS/MS	By MS/MS
A5GFY8	sp|A5GFY8|SERA_PIG	sp|A5GFY8|SERA_PIG	10	10	6	sp|A5GFY8|SERA_PIG D-3-phosphoglycerate dehydrogenase OS=Sus scrofa OX=9823 GN=PHGDH PE=3 SV=1	D-3-phosphoglycerate dehydrogenase	PHGDH	Sus scrofa	1	10	10	6	10	10	10	10	8	8	10	10	10	10	8	8	6	6	6	6	4	4	2022-08-27	2022-08-27	2022-05-16	56.809	533	533	1936-03-01	10	10	10	10	8	8	0	200.04	By MS/MS	By MS/MS	By MS/MS
Q96EP5	sp|Q96EP5|DAZP1_HUMAN	sp|Q96EP5|DAZP1_HUMAN	2	2	2	sp|Q96EP5|DAZP1_HUMAN DAZ-associated protein 1 OS=Homo sapiens OX=9606 GN=DAZAP1 PE=1 SV=1	DAZ-associated protein 1	DAZAP1	Homo sapiens	1	2	2	2	2	2	2	1	2	2	2	2	2	1	2	2	2	2	2	1	2	2	2022-09-06	2022-09-06	2022-09-06	43.383	407	407	1945-03-01	2	2	2	1	2	2	0	14.619	By MS/MS	By MS/MS	By MS/MS
Q9UKG1	sp|Q9UKG1|DP13A_HUMAN	sp|Q9UKG1|DP13A_HUMAN	2	2	2	sp|Q9UKG1|DP13A_HUMAN DCC-interacting protein 13-alpha OS=Homo sapiens OX=9606 GN=APPL1 PE=1 SV=1	DCC-interacting protein 13-alpha	APPL1	Homo sapiens	1	2	2	2	2	1	2	1	2	2	2	1	2	1	2	2	2	1	2	1	2	2	2022-05-03	2022-05-03	2022-05-03	79.663	709	709	2022-06-03	2	1	2	1	2	2	0	11.968	By MS/MS	By MS/MS	By MS/MS
P60982	sp|P60982|DEST_PIG;sp|P60981|DEST_HUMAN	sp|P60982|DEST_PIG;sp|P60981|DEST_HUMAN	3;3	3;3	3;3	sp|P60982|DEST_PIG Destrin OS=Sus scrofa OX=9823 GN=DSTN PE=1 SV=3;sp|P60981|DEST_HUMAN Destrin OS=Homo sapiens OX=9606 GN=DSTN PE=1 SV=3	Destrin	DSTN	Sus scrofa	2	3	3	3	2	2	2	3	2	2	2	2	2	3	2	2	2	2	2	3	2	2	2022-02-24	2022-02-24	2022-02-24	18.506	165	165;165	1954-03-01	2	2	2	3	2	2	0	30.685	By MS/MS	By MS/MS	By MS/MS
P09623	sp|P09623|DLDH_PIG;sp|P09622|DLDH_HUMAN	sp|P09623|DLDH_PIG;sp|P09622|DLDH_HUMAN	7;4	7;4	7;4	sp|P09623|DLDH_PIG Dihydrolipoyl dehydrogenase, mitochondrial OS=Sus scrofa OX=9823 GN=DLD PE=1 SV=1;sp|P09622|DLDH_HUMAN Dihydrolipoyl dehydrogenase, mitochondrial OS=Homo sapiens OX=9606 GN=DLD PE=1 SV=2	Dihydrolipoyl dehydrogenase, mitochondrial	DLD	Sus scrofa	2	7	7	7	7	7	7	7	7	7	7	7	7	7	7	7	7	7	7	7	7	7	2022-02-21	2022-02-21	2022-02-21	54.185	509	509;509	1949-03-01	9	9	11	10	9	9	0	87.274	By MS/MS	By MS/MS	By MS/MS
P10515	sp|P10515|ODP2_HUMAN	sp|P10515|ODP2_HUMAN	3	3	3	sp|P10515|ODP2_HUMAN Dihydrolipoyllysine-residue acetyltransferase component of pyruvate dehydrogenase complex, mitochondrial OS=Homo sapiens OX=9606 GN=DLAT PE=1 SV=3	Dihydrolipoyllysine-residue acetyltransferase component of pyruvate dehydrogenase complex, mitochondrial	DLAT	Homo sapiens	1	3	3	3	3	3	2	2	2	2	3	3	2	2	2	2	3	3	2	2	2	2	2022-01-07	2022-01-07	2022-01-07	68.996	647	647	2021-03-01	3	3	2	2	2	2	0	19.567	By MS/MS	By MS/MS	By MS/MS
Q9N0F1	sp|Q9N0F1|ODO2_PIG;sp|P36957|ODO2_HUMAN	sp|Q9N0F1|ODO2_PIG;sp|P36957|ODO2_HUMAN	3;2	3;2	3;2	sp|Q9N0F1|ODO2_PIG Dihydrolipoyllysine-residue succinyltransferase component of 2-oxoglutarate dehydrogenase complex, mitochondrial OS=Sus scrofa OX=9823 GN=DLST PE=1 SV=1;sp|P36957|ODO2_HUMAN Dihydrolipoyllysine-residue succinyltransferase component of 2-	Dihydrolipoyllysine-residue succinyltransferase component of 2-oxoglutarate dehydrogenase complex, mitochondrial	DLST	Sus scrofa	2	3	3	3	3	3	3	3	3	3	3	3	3	3	3	3	3	3	3	3	3	3	2022-07-09	2022-07-09	2022-07-09	48.976	455	455;453	2022-05-03	3	3	3	3	3	3	0	43.494	By MS/MS	By MS/MS	By MS/MS
Q8MJ30	sp|Q8MJ30|DHPR_PIG;sp|P09417|DHPR_HUMAN	sp|Q8MJ30|DHPR_PIG;sp|P09417|DHPR_HUMAN	6;3	6;3	6;3	sp|Q8MJ30|DHPR_PIG Dihydropteridine reductase OS=Sus scrofa OX=9823 GN=QDPR PE=2 SV=1;sp|P09417|DHPR_HUMAN Dihydropteridine reductase OS=Homo sapiens OX=9606 GN=QDPR PE=1 SV=2	Dihydropteridine reductase	QDPR	Sus scrofa	2	6	6	6	6	5	6	6	6	5	6	5	6	6	6	5	6	5	6	6	6	5	40.3	40.3	40.3	25.757	243	243;244	1947-03-01	6	5	6	6	6	5	0	70.243	By MS/MS	By MS/MS	By MS/MS
Q14194	sp|Q14194|DPYL1_HUMAN	sp|Q14194|DPYL1_HUMAN	10	8	8	sp|Q14194|DPYL1_HUMAN Dihydropyrimidinase-related protein 1 OS=Homo sapiens OX=9606 GN=CRMP1 PE=1 SV=1	Dihydropyrimidinase-related protein 1	CRMP1	Homo sapiens	1	10	8	8	10	10	10	10	10	10	8	8	8	8	8	8	8	8	8	8	8	8	2022-05-28	2022-04-23	2022-04-23	62.183	572	572	1943-03-01	11	11	11	10	10	10	0	110.33	By MS/MS	By MS/MS	By MS/MS
Q16555	sp|Q16555|DPYL2_HUMAN	sp|Q16555|DPYL2_HUMAN	18	18	15	sp|Q16555|DPYL2_HUMAN Dihydropyrimidinase-related protein 2 OS=Homo sapiens OX=9606 GN=DPYSL2 PE=1 SV=1	Dihydropyrimidinase-related protein 2	DPYSL2	Homo sapiens	1	18	18	15	18	18	18	17	17	17	18	18	18	17	17	17	15	15	15	14	14	14	53.1	53.1	44.6	62.293	572	572	1954-03-01	34	39	38	37	38	38	0	323.31	By MS/MS	By MS/MS	By MS/MS
Q14195	sp|Q14195|DPYL3_HUMAN	sp|Q14195|DPYL3_HUMAN	10	8	8	sp|Q14195|DPYL3_HUMAN Dihydropyrimidinase-related protein 3 OS=Homo sapiens OX=9606 GN=DPYSL3 PE=1 SV=1	Dihydropyrimidinase-related protein 3	DPYSL3	Homo sapiens	1	10	8	8	9	9	9	8	9	8	7	7	7	6	7	6	7	7	7	6	7	6	2022-01-28	2022-08-21	2022-08-21	61.963	570	570	1942-03-01	7	7	7	6	7	6	0	118.04	By MS/MS	By MS/MS	By MS/MS
O14531	sp|O14531|DPYL4_HUMAN	sp|O14531|DPYL4_HUMAN	3	3	3	sp|O14531|DPYL4_HUMAN Dihydropyrimidinase-related protein 4 OS=Homo sapiens OX=9606 GN=DPYSL4 PE=1 SV=2	Dihydropyrimidinase-related protein 4	DPYSL4	Homo sapiens	1	3	3	3	3	3	3	3	3	3	3	3	3	3	3	3	3	3	3	3	3	3	2022-09-08	2022-09-08	2022-09-08	61.877	572	572	2022-05-03	3	3	3	3	3	3	0	19.97	By MS/MS	By MS/MS	By MS/MS
Q9BPU6	sp|Q9BPU6|DPYL5_HUMAN	sp|Q9BPU6|DPYL5_HUMAN	3	3	3	sp|Q9BPU6|DPYL5_HUMAN Dihydropyrimidinase-related protein 5 OS=Homo sapiens OX=9606 GN=DPYSL5 PE=1 SV=1	Dihydropyrimidinase-related protein 5	DPYSL5	Homo sapiens	1	3	3	3	1	1	1	1	3	2	1	1	1	1	3	2	1	1	1	1	3	2	2022-05-11	2022-05-11	2022-05-11	61.421	564	564	2022-11-04	1	1	1	1	3	2	0	17.86	By MS/MS	By MS/MS	By matching
O95989	sp|O95989|NUDT3_HUMAN	sp|O95989|NUDT3_HUMAN	1	1	1	sp|O95989|NUDT3_HUMAN Diphosphoinositol polyphosphate phosphohydrolase 1 OS=Homo sapiens OX=9606 GN=NUDT3 PE=1 SV=1	Diphosphoinositol polyphosphate phosphohydrolase 1	NUDT3	Homo sapiens	1	1	1	1	0	0	0	1	1	1	0	0	0	1	1	1	0	0	0	1	1	1	2022-01-08	2022-01-08	2022-01-08	19.471	172	172	5				1	1	1	0.0033259	70.319
Q15700	sp|Q15700|DLG2_HUMAN;sp|Q12959|DLG1_HUMAN;sp|Q92796|DLG3_HUMAN	sp|Q15700|DLG2_HUMAN;sp|Q12959|DLG1_HUMAN	5;3;1	4;2;1	4;2;1	sp|Q15700|DLG2_HUMAN Disks large homolog 2 OS=Homo sapiens OX=9606 GN=DLG2 PE=1 SV=3;sp|Q12959|DLG1_HUMAN Disks large homolog 1 OS=Homo sapiens OX=9606 GN=DLG1 PE=1 SV=2	Disks large homolog 2	DLG2	Homo sapiens	3	5	4	4	5	4	4	3	4	4	4	3	3	2	3	3	4	3	3	2	3	3	2022-01-10	2022-02-07	2022-02-07	97.551	870	870;904;817	1933-03-01	4	3	3	2	3	3	0	28.869	By MS/MS	By MS/MS	By MS/MS
P78352	sp|P78352|DLG4_HUMAN	sp|P78352|DLG4_HUMAN	6	6	5	sp|P78352|DLG4_HUMAN Disks large homolog 4 OS=Homo sapiens OX=9606 GN=DLG4 PE=1 SV=3	Disks large homolog 4	DLG4	Homo sapiens	1	6	6	5	5	6	6	6	5	5	5	6	6	6	5	5	4	5	5	5	4	4	2022-08-14	2022-08-14	2022-03-11	80.494	724	724	1945-03-01	5	6	6	6	5	5	0	38.389	By MS/MS	By MS/MS	By MS/MS
Q16531	sp|Q16531|DDB1_HUMAN	sp|Q16531|DDB1_HUMAN	4	4	4	sp|Q16531|DDB1_HUMAN DNA damage-binding protein 1 OS=Homo sapiens OX=9606 GN=DDB1 PE=1 SV=1	DNA damage-binding protein 1	DDB1	Homo sapiens	1	4	4	4	4	4	3	3	3	3	4	4	3	3	3	3	4	4	3	3	3	3	2022-07-05	2022-07-05	2022-07-05	126.97	1140	1140	2022-03-03	4	4	3	3	3	3	0	28.166	By MS/MS	By MS/MS	By MS/MS
P27695	sp|P27695|APEX1_HUMAN	sp|P27695|APEX1_HUMAN	4	4	4	sp|P27695|APEX1_HUMAN DNA-(apurinic or apyrimidinic site) endonuclease OS=Homo sapiens OX=9606 GN=APEX1 PE=1 SV=2	DNA-(apurinic or apyrimidinic site) endonuclease	APEX1	Homo sapiens	1	4	4	4	4	4	4	4	4	4	4	4	4	4	4	4	4	4	4	4	4	4	22	22	22	35.554	318	318	1955-03-01	4	5	7	5	5	5	0	31.012	By MS/MS	By MS/MS	By MS/MS
P31689	sp|P31689|DNJA1_HUMAN	sp|P31689|DNJA1_HUMAN	3	3	3	sp|P31689|DNJA1_HUMAN DnaJ homolog subfamily A member 1 OS=Homo sapiens OX=9606 GN=DNAJA1 PE=1 SV=2	DnaJ homolog subfamily A member 1	DNAJA1	Homo sapiens	1	3	3	3	3	3	3	3	3	3	3	3	3	3	3	3	3	3	3	3	3	3	2022-08-12	2022-08-12	2022-08-12	44.868	397	397	2022-05-03	3	3	3	3	3	3	0	20.974	By MS/MS	By MS/MS	By MS/MS
O60884	sp|O60884|DNJA2_HUMAN	sp|O60884|DNJA2_HUMAN	3	3	3	sp|O60884|DNJA2_HUMAN DnaJ homolog subfamily A member 2 OS=Homo sapiens OX=9606 GN=DNAJA2 PE=1 SV=1	DnaJ homolog subfamily A member 2	DNAJA2	Homo sapiens	1	3	3	3	3	3	3	3	3	3	3	3	3	3	3	3	3	3	3	3	3	3	2022-02-10	2022-02-10	2022-02-10	45.745	412	412	2022-05-03	3	3	3	3	3	3	0	18.467	By MS/MS	By MS/MS	By MS/MS
Q8WW22	sp|Q8WW22|DNJA4_HUMAN	sp|Q8WW22|DNJA4_HUMAN	1	1	1	sp|Q8WW22|DNJA4_HUMAN DnaJ homolog subfamily A member 4 OS=Homo sapiens OX=9606 GN=DNAJA4 PE=1 SV=1	DnaJ homolog subfamily A member 4	DNAJA4	Homo sapiens	1	1	1	1	1	1	1	1	1	1	1	1	1	1	1	1	1	1	1	1	1	1	2022-03-03	2022-03-03	2022-03-03	44.797	397	397	2022-05-03	1	1	1	1	1	1	0.0034052	73.143	By MS/MS	By MS/MS	By MS/MS
P25685	sp|P25685|DNJB1_HUMAN;sp|Q9UDY4|DNJB4_HUMAN	sp|P25685|DNJB1_HUMAN	3;1	3;1	3;1	sp|P25685|DNJB1_HUMAN DnaJ homolog subfamily B member 1 OS=Homo sapiens OX=9606 GN=DNAJB1 PE=1 SV=4	DnaJ homolog subfamily B member 1	DNAJB1	Homo sapiens	2	3	3	3	2	2	1	3	1	1	2	2	1	3	1	1	2	2	1	3	1	1	2022-03-10	2022-03-10	2022-03-10	38.044	340	340;337	2022-02-03	2	2	1	3	1	1	0	17.175	By MS/MS	By MS/MS	By matching
Q9UBS4	sp|Q9UBS4|DJB11_HUMAN	sp|Q9UBS4|DJB11_HUMAN	1	1	1	sp|Q9UBS4|DJB11_HUMAN DnaJ homolog subfamily B member 11 OS=Homo sapiens OX=9606 GN=DNAJB11 PE=1 SV=1	DnaJ homolog subfamily B member 11	DNAJB11	Homo sapiens	1	1	1	1	0	1	1	1	1	1	0	1	1	1	1	1	0	1	1	1	1	1	2022-05-04	2022-05-04	2022-05-04	40.513	358	358	4		1	1	1	1	1	0.0033296	70.396		By MS/MS	By MS/MS
Q9H3Z4	sp|Q9H3Z4|DNJC5_HUMAN	sp|Q9H3Z4|DNJC5_HUMAN	1	1	1	sp|Q9H3Z4|DNJC5_HUMAN DnaJ homolog subfamily C member 5 OS=Homo sapiens OX=9606 GN=DNAJC5 PE=1 SV=1	DnaJ homolog subfamily C member 5	DNAJC5	Homo sapiens	1	1	1	1	1	1	1	1	1	1	1	1	1	1	1	1	1	1	1	1	1	1	2022-01-07	2022-01-07	2022-01-07	22.149	198	198	2022-05-03	1	1	1	1	1	1	0	19.415	By MS/MS	By MS/MS	By MS/MS
Q9GMB0	sp|Q9GMB0|RPN1_PIG;sp|P04843|RPN1_HUMAN	sp|Q9GMB0|RPN1_PIG	4;1	4;1	4;1	sp|Q9GMB0|RPN1_PIG Dolichyl-diphosphooligosaccharide--protein glycosyltransferase subunit 1 OS=Sus scrofa OX=9823 GN=RPN1 PE=1 SV=1	Dolichyl-diphosphooligosaccharide--protein glycosyltransferase subunit 1	RPN1	Sus scrofa	2	4	4	4	4	3	4	3	4	4	4	3	4	3	4	4	4	3	4	3	4	4	2022-02-09	2022-02-09	2022-02-09	68.694	608	608;607	1955-03-01	4	3	4	3	4	4	0	30.658	By MS/MS	By MS/MS	By MS/MS
Q9GL01	sp|Q9GL01|RPN2_PIG	sp|Q9GL01|RPN2_PIG	2	2	2	sp|Q9GL01|RPN2_PIG Dolichyl-diphosphooligosaccharide--protein glycosyltransferase subunit 2 OS=Sus scrofa OX=9823 GN=RPN2 PE=2 SV=1	Dolichyl-diphosphooligosaccharide--protein glycosyltransferase subunit 2	RPN2	Sus scrofa	1	2	2	2	2	2	2	2	2	2	2	2	2	2	2	2	2	2	2	2	2	2	2022-05-06	2022-05-06	2022-05-06	69.273	629	629	2022-05-03	2	2	2	2	2	2	0	20.578	By matching	By MS/MS	By MS/MS
Q16643	sp|Q16643|DREB_HUMAN	sp|Q16643|DREB_HUMAN	1	1	1	sp|Q16643|DREB_HUMAN Drebrin OS=Homo sapiens OX=9606 GN=DBN1 PE=1 SV=4	Drebrin	DBN1	Homo sapiens	1	1	1	1	1	1	1	0	0	0	1	1	1	0	0	0	1	1	1	0	0	0	2022-08-02	2022-08-02	2022-08-02	71.428	649	649	2	1	1	1				0.002454	86.572	By matching	By MS/MS	By matching
Q9UJU6	sp|Q9UJU6|DBNL_HUMAN	sp|Q9UJU6|DBNL_HUMAN	2	2	2	sp|Q9UJU6|DBNL_HUMAN Drebrin-like protein OS=Homo sapiens OX=9606 GN=DBNL PE=1 SV=1	Drebrin-like protein	DBNL	Homo sapiens	1	2	2	2	2	2	2	2	2	1	2	2	2	2	2	1	2	2	2	2	2	1	2022-07-07	2022-07-07	2022-07-07	48.207	430	430	2027-03-01	2	2	2	2	2	1	0	20.41	By MS/MS	By MS/MS	By MS/MS
Q02750	sp|Q02750|MP2K1_HUMAN	sp|Q02750|MP2K1_HUMAN	2	2	2	sp|Q02750|MP2K1_HUMAN Dual specificity mitogen-activated protein kinase kinase 1 OS=Homo sapiens OX=9606 GN=MAP2K1 PE=1 SV=2	Dual specificity mitogen-activated protein kinase kinase 1	MAP2K1	Homo sapiens	1	2	2	2	2	2	1	1	0	0	2	2	1	1	0	0	2	2	1	1	0	0	2022-01-07	2022-01-07	2022-01-07	43.439	393	393	2017-02-01	2	2	1	1			0	12.502	By MS/MS	By matching	By MS/MS
Q14203	sp|Q14203|DCTN1_HUMAN	sp|Q14203|DCTN1_HUMAN	9	9	9	sp|Q14203|DCTN1_HUMAN Dynactin subunit 1 OS=Homo sapiens OX=9606 GN=DCTN1 PE=1 SV=3	Dynactin subunit 1	DCTN1	Homo sapiens	1	9	9	9	9	9	9	8	8	8	9	9	9	8	8	8	9	9	9	8	8	8	2022-01-10	2022-01-10	2022-01-10	141.69	1278	1278	1941-03-01	9	9	9	8	8	8	0	62.368	By MS/MS	By MS/MS	By MS/MS
Q13561	sp|Q13561|DCTN2_HUMAN	sp|Q13561|DCTN2_HUMAN	6	6	6	sp|Q13561|DCTN2_HUMAN Dynactin subunit 2 OS=Homo sapiens OX=9606 GN=DCTN2 PE=1 SV=4	Dynactin subunit 2	DCTN2	Homo sapiens	1	6	6	6	6	6	6	6	6	6	6	6	6	6	6	6	6	6	6	6	6	6	2022-04-22	2022-04-22	2022-04-22	44.23	401	401	2022-05-03	6	6	6	6	6	6	0	67.251	By MS/MS	By MS/MS	By MS/MS
O75935	sp|O75935|DCTN3_HUMAN	sp|O75935|DCTN3_HUMAN	1	1	1	sp|O75935|DCTN3_HUMAN Dynactin subunit 3 OS=Homo sapiens OX=9606 GN=DCTN3 PE=1 SV=1	Dynactin subunit 3	DCTN3	Homo sapiens	1	1	1	1	0	0	0	0	0	1	0	0	0	0	0	1	0	0	0	0	0	1	2022-08-10	2022-08-10	2022-08-10	21.119	186	186	6						1	0.0073996	65.914
Q05193	sp|Q05193|DYN1_HUMAN;sp|P50570|DYN2_HUMAN	sp|Q05193|DYN1_HUMAN	14;2	14;2	9;0	sp|Q05193|DYN1_HUMAN Dynamin-1 OS=Homo sapiens OX=9606 GN=DNM1 PE=1 SV=2	Dynamin-1	DNM1	Homo sapiens	2	14	14	9	13	14	14	14	14	11	13	14	14	14	14	11	8	9	9	9	9	6	25	25	19	97.407	864	864;870	1944-03-01	13	14	14	14	14	11	0	113.64	By MS/MS	By MS/MS	By MS/MS
O00429	sp|O00429|DNM1L_HUMAN	sp|O00429|DNM1L_HUMAN	3	3	3	sp|O00429|DNM1L_HUMAN Dynamin-1-like protein OS=Homo sapiens OX=9606 GN=DNM1L PE=1 SV=2	Dynamin-1-like protein	DNM1L	Homo sapiens	1	3	3	3	3	3	3	1	1	2	3	3	3	1	1	2	3	3	3	1	1	2	2022-05-06	2022-05-06	2022-05-06	81.876	736	736	3	3	3	3	1	1	2	0	20.604	By MS/MS	By MS/MS	By MS/MS
Q9UQ16	sp|Q9UQ16|DYN3_HUMAN	sp|Q9UQ16|DYN3_HUMAN	7	2	2	sp|Q9UQ16|DYN3_HUMAN Dynamin-3 OS=Homo sapiens OX=9606 GN=DNM3 PE=1 SV=4	Dynamin-3	DNM3	Homo sapiens	1	7	2	2	7	7	7	7	7	7	2	2	2	2	2	2	2	2	2	2	2	2	2022-06-09	2022-06-03	2022-06-03	97.745	869	869	2022-05-03	2	2	2	2	2	2	0.0012837	11.114	By MS/MS	By MS/MS	By MS/MS
Q96FJ2	sp|Q96FJ2|DYL2_HUMAN;sp|P63167|DYL1_HUMAN	sp|Q96FJ2|DYL2_HUMAN;sp|P63167|DYL1_HUMAN	2;1	2;1	2;1	sp|Q96FJ2|DYL2_HUMAN Dynein light chain 2, cytoplasmic OS=Homo sapiens OX=9606 GN=DYNLL2 PE=1 SV=1;sp|P63167|DYL1_HUMAN Dynein light chain 1, cytoplasmic OS=Homo sapiens OX=9606 GN=DYNLL1 PE=1 SV=1	Dynein light chain 2, cytoplasmic	DYNLL2	Homo sapiens	2	2	2	2	2	2	2	2	2	2	2	2	2	2	2	2	2	2	2	2	2	2	37.1	37.1	37.1	1935-10-01	89	89;89	1958-03-01	3	3	3	3	4	3	0	38.83	By MS/MS	By MS/MS	By MS/MS
Q7Z6Z7	sp|Q7Z6Z7|HUWE1_HUMAN	sp|Q7Z6Z7|HUWE1_HUMAN	2	2	2	sp|Q7Z6Z7|HUWE1_HUMAN E3 ubiquitin-protein ligase HUWE1 OS=Homo sapiens OX=9606 GN=HUWE1 PE=1 SV=3	E3 ubiquitin-protein ligase HUWE1	HUWE1	Homo sapiens	1	2	2	2	1	1	2	0	0	0	1	1	2	0	0	0	1	1	2	0	0	0	0.8	0.8	0.8	481.89	4374	4374	2025-02-01	1	1	2				0	12.326	By MS/MS	By MS/MS	By MS/MS
P62877	sp|P62877|RBX1_HUMAN	sp|P62877|RBX1_HUMAN	1	1	1	sp|P62877|RBX1_HUMAN E3 ubiquitin-protein ligase RBX1 OS=Homo sapiens OX=9606 GN=RBX1 PE=1 SV=1	E3 ubiquitin-protein ligase RBX1	RBX1	Homo sapiens	1	1	1	1	1	1	1	0	0	0	1	1	1	0	0	0	1	1	1	0	0	0	2022-07-16	2022-07-16	2022-07-16	12.274	108	108	2	1	1	1				0.0023041	7.491	By MS/MS	By MS/MS	By MS/MS
Q9C037	sp|Q9C037|TRIM4_HUMAN	sp|Q9C037|TRIM4_HUMAN	1	1	1	sp|Q9C037|TRIM4_HUMAN E3 ubiquitin-protein ligase TRIM4 OS=Homo sapiens OX=9606 GN=TRIM4 PE=1 SV=2	E3 ubiquitin-protein ligase TRIM4	TRIM4	Homo sapiens	1	1	1	1	0	0	0	1	0	0	0	0	0	1	0	0	0	0	0	1	0	0	2022-06-01	2022-06-01	2022-06-01	57.46	500	500	4				1			0.0043668	6.834
Q9H4M9	sp|Q9H4M9|EHD1_HUMAN;sp|Q9NZN3|EHD3_HUMAN	sp|Q9H4M9|EHD1_HUMAN;sp|Q9NZN3|EHD3_HUMAN	1;1	1;1	1;1	sp|Q9H4M9|EHD1_HUMAN EH domain-containing protein 1 OS=Homo sapiens OX=9606 GN=EHD1 PE=1 SV=2;sp|Q9NZN3|EHD3_HUMAN EH domain-containing protein 3 OS=Homo sapiens OX=9606 GN=EHD3 PE=1 SV=2	EH domain-containing protein 1	EHD1	Homo sapiens	2	1	1	1	1	1	1	1	1	1	1	1	1	1	1	1	1	1	1	1	1	1	2022-02-02	2022-02-02	2022-02-02	60.626	534	534;535	2022-05-03	1	1	1	1	1	1	0.0094637	65.517	By MS/MS	By MS/MS	By MS/MS
Q9Y6R1	sp|Q9Y6R1|S4A4_HUMAN;sp|Q4U116|S4A4_PIG	sp|Q9Y6R1|S4A4_HUMAN;sp|Q4U116|S4A4_PIG	1;1	1;1	1;1	sp|Q9Y6R1|S4A4_HUMAN Electrogenic sodium bicarbonate cotransporter 1 OS=Homo sapiens OX=9606 GN=SLC4A4 PE=1 SV=1;sp|Q4U116|S4A4_PIG Electrogenic sodium bicarbonate cotransporter 1 OS=Sus scrofa OX=9823 GN=SLC4A4 PE=1 SV=1	Electrogenic sodium bicarbonate cotransporter 1	SLC4A4	Homo sapiens	2	1	1	1	0	0	0	1	0	0	0	0	0	1	0	0	0	0	0	1	0	0	2022-06-01	2022-06-01	2022-06-01	121.46	1079	1079;1079	4				1			0.0034208	73.339
P13804	sp|P13804|ETFA_HUMAN	sp|P13804|ETFA_HUMAN	6	6	6	sp|P13804|ETFA_HUMAN Electron transfer flavoprotein subunit alpha, mitochondrial OS=Homo sapiens OX=9606 GN=ETFA PE=1 SV=1	Electron transfer flavoprotein subunit alpha, mitochondrial	ETFA	Homo sapiens	1	6	6	6	4	6	5	5	3	3	4	6	5	5	3	3	4	6	5	5	3	3	2022-06-27	2022-06-27	2022-06-27	35.079	333	333	2028-03-01	5	7	6	6	4	4	0	99.625	By MS/MS	By MS/MS	By MS/MS
Q6UAQ8	sp|Q6UAQ8|ETFB_PIG;sp|P38117|ETFB_HUMAN	sp|Q6UAQ8|ETFB_PIG;sp|P38117|ETFB_HUMAN	4;2	4;2	4;2	sp|Q6UAQ8|ETFB_PIG Electron transfer flavoprotein subunit beta OS=Sus scrofa OX=9823 GN=ETFB PE=1 SV=3;sp|P38117|ETFB_HUMAN Electron transfer flavoprotein subunit beta OS=Homo sapiens OX=9606 GN=ETFB PE=1 SV=3	Electron transfer flavoprotein subunit beta	ETFB	Sus scrofa	2	4	4	4	4	4	4	3	3	3	4	4	4	3	3	3	4	4	4	3	3	3	2022-05-23	2022-05-23	2022-05-23	27.763	255	255;255	2029-03-01	4	4	4	3	3	3	0	24.991	By MS/MS	By MS/MS	By MS/MS
Q16134	sp|Q16134|ETFD_HUMAN	sp|Q16134|ETFD_HUMAN	1	1	1	sp|Q16134|ETFD_HUMAN Electron transfer flavoprotein-ubiquinone oxidoreductase, mitochondrial OS=Homo sapiens OX=9606 GN=ETFDH PE=1 SV=2	Electron transfer flavoprotein-ubiquinone oxidoreductase, mitochondrial	ETFDH	Homo sapiens	1	1	1	1	0	0	0	1	1	0	0	0	0	1	1	0	0	0	0	1	1	0	2022-04-03	2022-04-03	2022-04-03	68.495	617	617	2022-05-04				1	1		0.0033482	71.052
Q2Y0W8	sp|Q2Y0W8|S4A8_HUMAN;sp|Q6U841|S4A10_HUMAN	sp|Q2Y0W8|S4A8_HUMAN;sp|Q6U841|S4A10_HUMAN	2;2	2;2	2;2	sp|Q2Y0W8|S4A8_HUMAN Electroneutral sodium bicarbonate exchanger 1 OS=Homo sapiens OX=9606 GN=SLC4A8 PE=1 SV=1;sp|Q6U841|S4A10_HUMAN Sodium-driven chloride bicarbonate exchanger OS=Homo sapiens OX=9606 GN=SLC4A10 PE=1 SV=1	Electroneutral sodium bicarbonate exchanger 1	SLC4A8	Homo sapiens	2	2	2	2	2	2	2	2	2	2	2	2	2	2	2	2	2	2	2	2	2	2	2022-02-02	2022-02-02	2022-02-02	122.94	1093	1093;1118	2022-05-03	2	2	2	2	2	2	0	12.195	By matching	By matching	By MS/MS
Q05639	sp|Q05639|EF1A2_HUMAN	sp|Q05639|EF1A2_HUMAN	11	4	4	sp|Q05639|EF1A2_HUMAN Elongation factor 1-alpha 2 OS=Homo sapiens OX=9606 GN=EEF1A2 PE=1 SV=1	Elongation factor 1-alpha 2	EEF1A2	Homo sapiens	1	11	4	4	11	11	10	11	11	11	4	4	4	4	4	4	4	4	4	4	4	4	37.8	22	22	50.47	463	463	1959-03-01	4	5	5	5	5	5	0	25.211	By MS/MS	By MS/MS	By MS/MS
P24534	sp|P24534|EF1B_HUMAN	sp|P24534|EF1B_HUMAN	4	4	2	sp|P24534|EF1B_HUMAN Elongation factor 1-beta OS=Homo sapiens OX=9606 GN=EEF1B2 PE=1 SV=3	Elongation factor 1-beta	EEF1B2	Homo sapiens	1	4	4	2	4	4	4	3	3	3	4	4	4	3	3	3	2	2	2	1	1	1	2022-03-25	2022-03-25	2022-08-13	24.763	225	225	2029-03-01	4	4	4	3	3	3	0	126.28	By MS/MS	By MS/MS	By MS/MS
P29412	sp|P29412|EF1B_PIG	sp|P29412|EF1B_PIG	2	1	1	sp|P29412|EF1B_PIG Elongation factor 1-beta OS=Sus scrofa OX=9823 GN=EEF1B PE=1 SV=1	Elongation factor 1-beta	EEF1B	Sus scrofa	1	2	1	1	2	2	2	2	2	2	1	1	1	1	1	1	1	1	1	1	1	1	2022-07-14	8	8	19.966	224	224	1957-03-01	1	1	1	2	1	1	0	11.554	By MS/MS	By MS/MS	By MS/MS
P26641	sp|P26641|EF1G_HUMAN	sp|P26641|EF1G_HUMAN	4	1	1	sp|P26641|EF1G_HUMAN Elongation factor 1-gamma OS=Homo sapiens OX=9606 GN=EEF1G PE=1 SV=3	Elongation factor 1-gamma	EEF1G	Homo sapiens	1	4	1	1	4	4	4	4	4	4	1	1	1	1	1	1	1	1	1	1	1	1	2022-08-10	3	3	50.118	437	437	2022-05-03	1	1	1	1	1	1	0.0073762	65.742	By MS/MS	By MS/MS	By MS/MS
Q29387	sp|Q29387|EF1G_PIG	sp|Q29387|EF1G_PIG	6	6	3	sp|Q29387|EF1G_PIG Elongation factor 1-gamma (Fragment) OS=Sus scrofa OX=9823 GN=EEF1G PE=2 SV=2	Elongation factor 1-gamma (Fragment)	EEF1G	Sus scrofa	1	6	6	3	5	5	6	5	6	5	5	5	6	5	6	5	2	2	3	2	3	2	2022-01-18	2022-01-18	2022-02-10	49.624	432	432	1956-03-01	6	7	7	7	7	7	0	65.647	By MS/MS	By MS/MS	By MS/MS
P13639	sp|P13639|EF2_HUMAN	sp|P13639|EF2_HUMAN	11	11	11	sp|P13639|EF2_HUMAN Elongation factor 2 OS=Homo sapiens OX=9606 GN=EEF2 PE=1 SV=4	Elongation factor 2	EEF2	Homo sapiens	1	11	11	11	11	9	9	8	8	8	11	9	9	8	8	8	11	9	9	8	8	8	2022-05-18	2022-05-18	2022-05-18	95.337	858	858	1932-03-01	11	9	9	8	8	8	0	84.554	By MS/MS	By MS/MS	By MS/MS
P49411	sp|P49411|EFTU_HUMAN	sp|P49411|EFTU_HUMAN	4	4	4	sp|P49411|EFTU_HUMAN Elongation factor Tu, mitochondrial OS=Homo sapiens OX=9606 GN=TUFM PE=1 SV=2	Elongation factor Tu, mitochondrial	TUFM	Homo sapiens	1	4	4	4	4	4	4	3	4	3	4	4	4	3	4	3	4	4	4	3	4	3	2022-02-10	2022-02-10	2022-02-10	49.541	452	452	2022-03-03	4	5	4	3	4	3	0	25.437	By MS/MS	By MS/MS	By MS/MS
Q15370	sp|Q15370|ELOB_HUMAN	sp|Q15370|ELOB_HUMAN	2	2	2	sp|Q15370|ELOB_HUMAN Elongin-B OS=Homo sapiens OX=9606 GN=ELOB PE=1 SV=1	Elongin-B	ELOB	Homo sapiens	1	2	2	2	1	1	2	1	1	1	1	1	2	1	1	1	1	1	2	1	1	1	2022-02-21	2022-02-21	2022-02-21	13.133	118	118	1943-03-01	1	1	2	1	1	1	0	12.379	By MS/MS	By MS/MS	By MS/MS
Q15369	sp|Q15369|ELOC_HUMAN	sp|Q15369|ELOC_HUMAN	2	2	2	sp|Q15369|ELOC_HUMAN Elongin-C OS=Homo sapiens OX=9606 GN=ELOC PE=1 SV=1	Elongin-C	ELOC	Homo sapiens	1	2	2	2	2	2	2	1	0	0	2	2	2	1	0	0	2	2	2	1	0	0	2022-02-23	2022-02-23	2022-02-23	12.473	112	112	2029-02-01	2	2	2	1			0	11.677	By MS/MS	By MS/MS	By MS/MS
Q99962	sp|Q99962|SH3G2_HUMAN;sp|Q99961|SH3G1_HUMAN	sp|Q99962|SH3G2_HUMAN	6;1	6;1	6;1	sp|Q99962|SH3G2_HUMAN Endophilin-A1 OS=Homo sapiens OX=9606 GN=SH3GL2 PE=1 SV=1	Endophilin-A1	SH3GL2	Homo sapiens	2	6	6	6	6	6	6	6	6	6	6	6	6	6	6	6	6	6	6	6	6	6	2022-06-25	2022-06-25	2022-06-25	39.962	352	352;368	2022-05-03	7	7	7	7	7	7	0	118.55	By MS/MS	By MS/MS	By MS/MS
P11021	sp|P11021|BIP_HUMAN;sp|P34935|BIP_PIG	sp|P11021|BIP_HUMAN	17;3	16;3	16;3	sp|P11021|BIP_HUMAN Endoplasmic reticulum chaperone BiP OS=Homo sapiens OX=9606 GN=HSPA5 PE=1 SV=2	Endoplasmic reticulum chaperone BiP	HSPA5	Homo sapiens	2	17	16	16	17	16	16	16	17	16	16	15	15	15	16	15	16	15	15	15	16	15	33.6	31.2	31.2	72.332	654	654;262	2022-05-03	17	17	18	18	17	17	0	323.31	By MS/MS	By MS/MS	By MS/MS
P30040	sp|P30040|ERP29_HUMAN	sp|P30040|ERP29_HUMAN	3	3	3	sp|P30040|ERP29_HUMAN Endoplasmic reticulum resident protein 29 OS=Homo sapiens OX=9606 GN=ERP29 PE=1 SV=4	Endoplasmic reticulum resident protein 29	ERP29	Homo sapiens	1	3	3	3	3	2	3	3	2	3	3	2	3	3	2	3	3	2	3	3	2	3	2022-08-18	2022-08-18	2022-08-18	28.993	261	261	1956-03-01	3	2	4	3	3	3	0	40.006	By MS/MS	By MS/MS	By MS/MS
Q9BS26	sp|Q9BS26|ERP44_HUMAN	sp|Q9BS26|ERP44_HUMAN	4	4	4	sp|Q9BS26|ERP44_HUMAN Endoplasmic reticulum resident protein 44 OS=Homo sapiens OX=9606 GN=ERP44 PE=1 SV=1	Endoplasmic reticulum resident protein 44	ERP44	Homo sapiens	1	4	4	4	2	3	4	3	3	3	2	3	4	3	3	3	2	3	4	3	3	3	2022-01-13	2022-01-13	2022-01-13	46.971	406	406	1961-03-01	2	3	4	3	3	3	0	26.236	By MS/MS	By MS/MS	By MS/MS
Q29092	sp|Q29092|ENPL_PIG;sp|P14625|ENPL_HUMAN;sp|Q58FF3|ENPLL_HUMAN	sp|Q29092|ENPL_PIG;sp|P14625|ENPL_HUMAN	19;17;1	18;16;1	18;16;1	sp|Q29092|ENPL_PIG Endoplasmin OS=Sus scrofa OX=9823 GN=HSP90B1 PE=2 SV=3;sp|P14625|ENPL_HUMAN Endoplasmin OS=Homo sapiens OX=9606 GN=HSP90B1 PE=1 SV=1	Endoplasmin	HSP90B1	Sus scrofa	3	19	18	18	18	18	17	17	17	17	17	17	16	16	16	16	17	17	16	16	16	16	2022-01-28	2022-06-26	2022-06-26	92.47	804	804;803;399	1946-03-01	19	19	18	18	18	18	0	323.31	By MS/MS	By MS/MS	By MS/MS
P84090	sp|P84090|ERH_HUMAN	sp|P84090|ERH_HUMAN	2	2	2	sp|P84090|ERH_HUMAN Enhancer of rudimentary homolog OS=Homo sapiens OX=9606 GN=ERH PE=1 SV=1	Enhancer of rudimentary homolog	ERH	Homo sapiens	1	2	2	2	2	2	2	2	2	2	2	2	2	2	2	2	2	2	2	2	2	2	2022-09-26	2022-09-26	2022-09-26	12.259	104	104	1954-03-01	2	2	2	3	2	2	0	49.989	By MS/MS	By MS/MS	By MS/MS
Q9UHY7	sp|Q9UHY7|ENOPH_HUMAN	sp|Q9UHY7|ENOPH_HUMAN	1	1	1	sp|Q9UHY7|ENOPH_HUMAN Enolase-phosphatase E1 OS=Homo sapiens OX=9606 GN=ENOPH1 PE=1 SV=1	Enolase-phosphatase E1	ENOPH1	Homo sapiens	1	1	1	1	1	1	1	1	0	0	1	1	1	1	0	0	1	1	1	1	0	0	2022-07-07	2022-07-07	2022-07-07	28.932	261	261	2022-05-02	1	1	1	1			0	12.227	By MS/MS	By MS/MS	By MS/MS
P79381	sp|P79381|HYEP_PIG;sp|P07099|HYEP_HUMAN	sp|P79381|HYEP_PIG	5;1	5;1	5;1	sp|P79381|HYEP_PIG Epoxide hydrolase 1 OS=Sus scrofa OX=9823 GN=EPHX1 PE=2 SV=1	Epoxide hydrolase 1	EPHX1	Sus scrofa	2	5	5	5	4	3	2	4	2	2	4	3	2	4	2	2	4	3	2	4	2	2	2022-09-20	2022-09-20	2022-09-20	52.394	454	454;455	2018-03-01	4	3	2	4	2	2	0	97.67	By MS/MS	By MS/MS	By matching
Q96HE7	sp|Q96HE7|ERO1A_HUMAN;sp|B6CVD7|ERO1A_PIG	sp|Q96HE7|ERO1A_HUMAN;sp|B6CVD7|ERO1A_PIG	3;3	3;3	3;3	sp|Q96HE7|ERO1A_HUMAN ERO1-like protein alpha OS=Homo sapiens OX=9606 GN=ERO1A PE=1 SV=2;sp|B6CVD7|ERO1A_PIG ERO1-like protein alpha OS=Sus scrofa OX=9823 GN=ERO1A PE=2 SV=1	ERO1-like protein alpha	ERO1A	Homo sapiens	2	3	3	3	2	2	3	2	2	2	2	2	3	2	2	2	2	2	3	2	2	2	2022-02-09	2022-02-09	2022-02-09	54.392	468	468;468	1946-03-01	2	2	3	2	2	2	0	21.916	By MS/MS	By MS/MS	By MS/MS
Q14240	sp|Q14240|IF4A2_HUMAN;sp|P60842|IF4A1_HUMAN;sp|P38919|IF4A3_HUMAN;sp|A6M931|IF4A3_PIG	sp|Q14240|IF4A2_HUMAN;sp|P60842|IF4A1_HUMAN	6;3;1;1	6;3;1;1	6;3;1;1	sp|Q14240|IF4A2_HUMAN Eukaryotic initiation factor 4A-II OS=Homo sapiens OX=9606 GN=EIF4A2 PE=1 SV=2;sp|P60842|IF4A1_HUMAN Eukaryotic initiation factor 4A-I OS=Homo sapiens OX=9606 GN=EIF4A1 PE=1 SV=1	Eukaryotic initiation factor 4A-II	EIF4A2	Homo sapiens	4	6	6	6	6	5	5	4	4	4	6	5	5	4	4	4	6	5	5	4	4	4	2022-03-23	2022-03-23	2022-03-23	46.402	407	407;406;411;411	2025-03-01	6	5	5	4	4	4	0	68.485	By MS/MS	By MS/MS	By MS/MS
P41567	sp|P41567|EIF1_HUMAN;sp|P61220|EIF1B_PIG;sp|O60739|EIF1B_HUMAN	sp|P41567|EIF1_HUMAN;sp|P61220|EIF1B_PIG;sp|O60739|EIF1B_HUMAN	3;2;2	3;2;2	3;2;2	sp|P41567|EIF1_HUMAN Eukaryotic translation initiation factor 1 OS=Homo sapiens OX=9606 GN=EIF1 PE=1 SV=1;sp|P61220|EIF1B_PIG Eukaryotic translation initiation factor 1b OS=Sus scrofa OX=9823 GN=EIF1B PE=3 SV=1;sp|O60739|EIF1B_HUMAN Eukaryotic translation	Eukaryotic translation initiation factor 1	EIF1	Homo sapiens	3	3	3	3	3	3	3	3	3	3	3	3	3	3	3	3	3	3	3	3	3	3	48.7	48.7	48.7	12.732	113	113;113;113	2022-05-03	3	3	3	3	3	3	0	21.635	By MS/MS	By MS/MS	By MS/MS
P47813	sp|P47813|IF1AX_HUMAN;sp|O14602|IF1AY_HUMAN	sp|P47813|IF1AX_HUMAN;sp|O14602|IF1AY_HUMAN	1;1	1;1	1;1	sp|P47813|IF1AX_HUMAN Eukaryotic translation initiation factor 1A, X-chromosomal OS=Homo sapiens OX=9606 GN=EIF1AX PE=1 SV=2;sp|O14602|IF1AY_HUMAN Eukaryotic translation initiation factor 1A, Y-chromosomal OS=Homo sapiens OX=9606 GN=EIF1AY PE=1 SV=4	Eukaryotic translation initiation factor 1A, X-chromosomal	EIF1AX	Homo sapiens	2	1	1	1	1	1	1	1	0	0	1	1	1	1	0	0	1	1	1	1	0	0	2022-06-07	2022-06-07	2022-06-07	16.46	144	144;144	2022-05-02	1	1	1	1			0.009434	65.293	By MS/MS	By MS/MS	By MS/MS
P41091	sp|P41091|IF2G_HUMAN;sp|Q2VIR3|IF2GL_HUMAN	sp|P41091|IF2G_HUMAN;sp|Q2VIR3|IF2GL_HUMAN	2;1	2;1	2;1	sp|P41091|IF2G_HUMAN Eukaryotic translation initiation factor 2 subunit 3 OS=Homo sapiens OX=9606 GN=EIF2S3 PE=1 SV=3;sp|Q2VIR3|IF2GL_HUMAN Eukaryotic translation initiation factor 2 subunit 3B OS=Homo sapiens OX=9606 GN=EIF2S3B PE=2 SV=2	Eukaryotic translation initiation factor 2 subunit 3	EIF2S3	Homo sapiens	2	2	2	2	2	2	2	2	2	2	2	2	2	2	2	2	2	2	2	2	2	2	2022-02-07	2022-02-07	2022-02-07	51.109	472	472;472	2022-05-03	2	2	2	2	2	2	0	12.825	By MS/MS	By MS/MS	By MS/MS
Q15056	sp|Q15056|IF4H_HUMAN	sp|Q15056|IF4H_HUMAN	2	2	2	sp|Q15056|IF4H_HUMAN Eukaryotic translation initiation factor 4H OS=Homo sapiens OX=9606 GN=EIF4H PE=1 SV=5	Eukaryotic translation initiation factor 4H	EIF4H	Homo sapiens	1	2	2	2	2	2	2	2	2	2	2	2	2	2	2	2	2	2	2	2	2	2	2022-01-14	2022-01-14	2022-01-14	27.385	248	248	2022-05-03	2	2	2	2	2	2	0	2022-08-16	By MS/MS	By MS/MS	By MS/MS
P63241	sp|P63241|IF5A1_HUMAN;sp|Q9GZV4|IF5A2_HUMAN;sp|Q6IS14|IF5AL_HUMAN	sp|P63241|IF5A1_HUMAN;sp|Q9GZV4|IF5A2_HUMAN;sp|Q6IS14|IF5AL_HUMAN	3;2;2	3;2;2	3;2;2	sp|P63241|IF5A1_HUMAN Eukaryotic translation initiation factor 5A-1 OS=Homo sapiens OX=9606 GN=EIF5A PE=1 SV=2;sp|Q9GZV4|IF5A2_HUMAN Eukaryotic translation initiation factor 5A-2 OS=Homo sapiens OX=9606 GN=EIF5A2 PE=1 SV=3;sp|Q6IS14|IF5AL_HUMAN Eukaryotic	Eukaryotic translation initiation factor 5A-1	EIF5A	Homo sapiens	3	3	3	3	3	2	3	3	2	2	3	2	3	3	2	2	3	2	3	3	2	2	35.1	35.1	35.1	16.832	154	154;153;154	1933-03-01	3	2	3	3	2	2	0	17.518	By MS/MS	By MS/MS	By MS/MS
P43003	sp|P43003|EAA1_HUMAN;sp|P48664|EAA4_HUMAN	sp|P43003|EAA1_HUMAN	6;1	6;1	6;1	sp|P43003|EAA1_HUMAN Excitatory amino acid transporter 1 OS=Homo sapiens OX=9606 GN=SLC1A3 PE=1 SV=1	Excitatory amino acid transporter 1	SLC1A3	Homo sapiens	2	6	6	6	5	5	6	6	6	4	5	5	6	6	6	4	5	5	6	6	6	4	2022-07-12	2022-07-12	2022-07-12	59.572	542	542;564	1947-03-01	6	6	7	7	7	5	0	120.84	By MS/MS	By MS/MS	By MS/MS
O14980	sp|O14980|XPO1_HUMAN	sp|O14980|XPO1_HUMAN	7	7	7	sp|O14980|XPO1_HUMAN Exportin-1 OS=Homo sapiens OX=9606 GN=XPO1 PE=1 SV=1	Exportin-1	XPO1	Homo sapiens	1	7	7	7	5	6	7	6	6	5	5	6	7	6	6	5	5	6	7	6	6	5	10	10	10	123.38	1071	1071	1949-03-01	5	6	7	6	6	5	0	54.771	By MS/MS	By MS/MS	By MS/MS
P55060	sp|P55060|XPO2_HUMAN	sp|P55060|XPO2_HUMAN	3	3	3	sp|P55060|XPO2_HUMAN Exportin-2 OS=Homo sapiens OX=9606 GN=CSE1L PE=1 SV=3	Exportin-2	CSE1L	Homo sapiens	1	3	3	3	3	3	3	3	3	3	3	3	3	3	3	3	3	3	3	3	3	3	2022-09-04	2022-09-04	2022-09-04	110.42	971	971	2022-05-03	3	3	3	3	3	3	0	25.164	By MS/MS	By MS/MS	By MS/MS
P52907	sp|P52907|CAZA1_HUMAN	sp|P52907|CAZA1_HUMAN	3	2	2	sp|P52907|CAZA1_HUMAN F-actin-capping protein subunit alpha-1 OS=Homo sapiens OX=9606 GN=CAPZA1 PE=1 SV=3	F-actin-capping protein subunit alpha-1	CAPZA1	Homo sapiens	1	3	2	2	3	2	3	2	2	2	2	2	2	2	2	2	2	2	2	2	2	2	2022-02-18	2022-02-12	2022-02-12	32.922	286	286	2022-05-03	2	2	2	2	2	2	0.0012821	2022-01-11	By matching	By MS/MS	By MS/MS
Q29221	sp|Q29221|CAZA2_PIG;sp|P47755|CAZA2_HUMAN	sp|Q29221|CAZA2_PIG;sp|P47755|CAZA2_HUMAN	6;6	6;6	5;5	sp|Q29221|CAZA2_PIG F-actin-capping protein subunit alpha-2 OS=Sus scrofa OX=9823 GN=CAPZA2 PE=2 SV=3;sp|P47755|CAZA2_HUMAN F-actin-capping protein subunit alpha-2 OS=Homo sapiens OX=9606 GN=CAPZA2 PE=1 SV=3	F-actin-capping protein subunit alpha-2	CAPZA2	Sus scrofa	2	6	6	5	5	4	6	5	4	5	5	4	6	5	4	5	4	4	5	5	4	5	33.9	33.9	28	32.981	286	286;286	1948-03-01	5	4	6	5	4	5	0	40.403	By MS/MS	By MS/MS	By MS/MS
P47756	sp|P47756|CAPZB_HUMAN;sp|A0PFK7|CAPZB_PIG	sp|P47756|CAPZB_HUMAN;sp|A0PFK7|CAPZB_PIG	6;6	6;6	6;6	sp|P47756|CAPZB_HUMAN F-actin-capping protein subunit beta OS=Homo sapiens OX=9606 GN=CAPZB PE=1 SV=4;sp|A0PFK7|CAPZB_PIG F-actin-capping protein subunit beta OS=Sus scrofa OX=9823 GN=CAPZB PE=2 SV=1	F-actin-capping protein subunit beta	CAPZB	Homo sapiens	2	6	6	6	5	5	5	5	6	5	5	5	5	5	6	5	5	5	5	5	6	5	2022-08-23	2022-08-23	2022-08-23	31.35	277	277;277	1956-03-01	5	5	5	6	6	5	0	58.718	By MS/MS	By MS/MS	By MS/MS
Q96AE4	sp|Q96AE4|FUBP1_HUMAN	sp|Q96AE4|FUBP1_HUMAN	4	4	4	sp|Q96AE4|FUBP1_HUMAN Far upstream element-binding protein 1 OS=Homo sapiens OX=9606 GN=FUBP1 PE=1 SV=3	Far upstream element-binding protein 1	FUBP1	Homo sapiens	1	4	4	4	4	3	3	1	3	3	4	3	3	1	3	3	4	3	3	1	3	3	2022-03-09	2022-03-09	2022-03-09	67.56	644	644	2029-03-01	4	3	3	1	3	3	0	25.478	By MS/MS	By MS/MS	By MS/MS
Q92945	sp|Q92945|FUBP2_HUMAN	sp|Q92945|FUBP2_HUMAN	13	13	13	sp|Q92945|FUBP2_HUMAN Far upstream element-binding protein 2 OS=Homo sapiens OX=9606 GN=KHSRP PE=1 SV=4	Far upstream element-binding protein 2	KHSRP	Homo sapiens	1	13	13	13	13	12	12	11	11	11	13	12	12	11	11	11	13	12	12	11	11	11	2022-07-28	2022-07-28	2022-07-28	73.114	711	711	2022-04-03	15	14	16	13	13	13	0	197.36	By MS/MS	By MS/MS	By MS/MS
Q16658	sp|Q16658|FSCN1_HUMAN	sp|Q16658|FSCN1_HUMAN	4	4	4	sp|Q16658|FSCN1_HUMAN Fascin OS=Homo sapiens OX=9606 GN=FSCN1 PE=1 SV=3	Fascin	FSCN1	Homo sapiens	1	4	4	4	3	4	4	4	4	4	3	4	4	4	4	4	3	4	4	4	4	4	2022-06-13	2022-06-13	2022-06-13	54.529	493	493	1961-03-01	3	4	4	4	4	4	0	44.223	By MS/MS	By MS/MS	By MS/MS
P49327	sp|P49327|FAS_HUMAN	sp|P49327|FAS_HUMAN	2	2	2	sp|P49327|FAS_HUMAN Fatty acid synthase OS=Homo sapiens OX=9606 GN=FASN PE=1 SV=3	Fatty acid synthase	FASN	Homo sapiens	1	2	2	2	2	2	2	2	2	2	2	2	2	2	2	2	2	2	2	2	2	2	2022-04-01	2022-04-01	2022-04-01	273.42	2511	2511	2022-05-03	2	2	2	2	2	2	0	2022-12-31	By MS/MS	By matching	By matching
O15540	sp|O15540|FABP7_HUMAN	sp|O15540|FABP7_HUMAN	2	2	2	sp|O15540|FABP7_HUMAN Fatty acid-binding protein, brain OS=Homo sapiens OX=9606 GN=FABP7 PE=1 SV=3	Fatty acid-binding protein, brain	FABP7	Homo sapiens	1	2	2	2	0	1	1	2	2	2	0	1	1	2	2	2	0	1	1	2	2	2	2022-07-16	2022-07-16	2022-07-16	14.889	132	132	1938-04-01		1	1	2	2	2	0.0025445	10.871		By MS/MS	By matching
P05413	sp|P05413|FABPH_HUMAN	sp|P05413|FABPH_HUMAN	2	2	1	sp|P05413|FABPH_HUMAN Fatty acid-binding protein, heart OS=Homo sapiens OX=9606 GN=FABP3 PE=1 SV=4	Fatty acid-binding protein, heart	FABP3	Homo sapiens	1	2	2	1	2	2	2	0	2	2	2	2	2	0	2	2	1	1	1	0	1	1	2022-03-17	2022-03-17	2022-05-07	14.858	133	133	2022-04-03	2	2	2		2	2	0	2028-12-01	By MS/MS	By MS/MS	By MS/MS
Q9TUI8	sp|Q9TUI8|FAAH1_PIG	sp|Q9TUI8|FAAH1_PIG	2	2	2	sp|Q9TUI8|FAAH1_PIG Fatty-acid amide hydrolase 1 OS=Sus scrofa OX=9823 GN=FAAH PE=1 SV=1	Fatty-acid amide hydrolase 1	FAAH	Sus scrofa	1	2	2	2	1	1	1	1	2	1	1	1	1	1	2	1	1	1	1	1	2	1	2022-03-08	2022-03-08	2022-03-08	62.856	579	579	1971-03-01	1	1	1	1	2	1	0	14.331	By MS/MS	By MS/MS	By MS/MS
P21333	sp|P21333|FLNA_HUMAN;sp|O75369|FLNB_HUMAN;sp|Q14315|FLNC_HUMAN	sp|P21333|FLNA_HUMAN	9;1;1	9;1;1	9;1;1	sp|P21333|FLNA_HUMAN Filamin-A OS=Homo sapiens OX=9606 GN=FLNA PE=1 SV=4	Filamin-A	FLNA	Homo sapiens	3	9	9	9	9	7	7	7	8	7	9	7	7	7	8	7	9	7	7	7	8	7	2022-09-05	2022-09-05	2022-09-05	280.74	2647	2647;2602;2725	1946-03-01	9	7	7	7	9	7	0	58.52	By MS/MS	By MS/MS	By MS/MS
P04075	sp|P04075|ALDOA_HUMAN	sp|P04075|ALDOA_HUMAN	16	16	12	sp|P04075|ALDOA_HUMAN Fructose-bisphosphate aldolase A OS=Homo sapiens OX=9606 GN=ALDOA PE=1 SV=2	Fructose-bisphosphate aldolase A	ALDOA	Homo sapiens	1	16	16	12	15	15	15	16	15	13	15	15	15	16	15	13	12	11	11	12	12	10	56.6	56.6	44.2	39.42	364	364	1942-03-01	25	28	24	26	23	23	0	323.31	By MS/MS	By MS/MS	By MS/MS
P09972	sp|P09972|ALDOC_HUMAN	sp|P09972|ALDOC_HUMAN	15	11	11	sp|P09972|ALDOC_HUMAN Fructose-bisphosphate aldolase C OS=Homo sapiens OX=9606 GN=ALDOC PE=1 SV=2	Fructose-bisphosphate aldolase C	ALDOC	Homo sapiens	1	15	11	11	13	15	15	15	14	14	10	11	11	11	11	11	10	11	11	11	11	11	44.2	31.9	31.9	39.455	364	364	1958-03-01	21	22	23	24	24	24	0	323.31	By MS/MS	By MS/MS	By MS/MS
P10173	sp|P10173|FUMH_PIG;sp|P07954|FUMH_HUMAN	sp|P10173|FUMH_PIG;sp|P07954|FUMH_HUMAN	10;8	10;8	10;8	sp|P10173|FUMH_PIG Fumarate hydratase, mitochondrial OS=Sus scrofa OX=9823 GN=FH PE=1 SV=2;sp|P07954|FUMH_HUMAN Fumarate hydratase, mitochondrial OS=Homo sapiens OX=9606 GN=FH PE=1 SV=3	Fumarate hydratase, mitochondrial	FH	Sus scrofa	2	10	10	10	9	9	10	10	10	10	9	9	10	10	10	10	9	9	10	10	10	10	39.3	39.3	39.3	54.748	512	512;510	1958-03-01	11	12	14	13	13	13	0	220.75	By MS/MS	By MS/MS	By MS/MS
Q96GK7	sp|Q96GK7|FAH2A_HUMAN;sp|Q6P2I3|FAH2B_HUMAN	sp|Q96GK7|FAH2A_HUMAN;sp|Q6P2I3|FAH2B_HUMAN	1;1	1;1	1;1	sp|Q96GK7|FAH2A_HUMAN Fumarylacetoacetate hydrolase domain-containing protein 2A OS=Homo sapiens OX=9606 GN=FAHD2A PE=1 SV=1;sp|Q6P2I3|FAH2B_HUMAN Fumarylacetoacetate hydrolase domain-containing protein 2B OS=Homo sapiens OX=9606 GN=FAHD2B PE=1 SV=1	Fumarylacetoacetate hydrolase domain-containing protein 2A	FAHD2A	Homo sapiens	2	1	1	1	1	1	1	1	1	1	1	1	1	1	1	1	1	1	1	1	1	1	2022-08-04	2022-08-04	2022-08-04	34.596	314	314;314	2022-05-03	1	1	1	1	1	1	0	14.022	By MS/MS	By MS/MS	By MS/MS
Q9GKX6	sp|Q9GKX6|GALM_PIG	sp|Q9GKX6|GALM_PIG	2	2	2	sp|Q9GKX6|GALM_PIG Galactose mutarotase OS=Sus scrofa OX=9823 GN=GALM PE=2 SV=1	Galactose mutarotase	GALM	Sus scrofa	1	2	2	2	2	2	2	2	2	2	2	2	2	2	2	2	2	2	2	2	2	2	2022-05-08	2022-05-08	2022-05-08	37.815	342	342	2022-05-03	2	2	2	2	2	2	0	12.719	By MS/MS	By MS/MS	By MS/MS
Q49I35	sp|Q49I35|LEG1_PIG;sp|P09382|LEG1_HUMAN	sp|Q49I35|LEG1_PIG	5;2	5;2	5;2	sp|Q49I35|LEG1_PIG Galectin-1 OS=Sus scrofa OX=9823 GN=LGALS1 PE=2 SV=3	Galectin-1	LGALS1	Sus scrofa	2	5	5	5	5	5	5	5	5	5	5	5	5	5	5	5	5	5	5	5	5	5	48.1	48.1	48.1	14.694	135	135;135	1932-03-01	7	11	8	8	7	6	0	211.1	By MS/MS	By MS/MS	By MS/MS
Q9UEY8	sp|Q9UEY8|ADDG_HUMAN	sp|Q9UEY8|ADDG_HUMAN	2	2	2	sp|Q9UEY8|ADDG_HUMAN Gamma-adducin OS=Homo sapiens OX=9606 GN=ADD3 PE=1 SV=1	Gamma-adducin	ADD3	Homo sapiens	1	2	2	2	2	2	2	2	2	2	2	2	2	2	2	2	2	2	2	2	2	2	4	4	4	79.154	706	706	2022-05-03	2	2	2	2	2	2	0	16.384	By MS/MS	By MS/MS	By MS/MS
P09104	sp|P09104|ENOG_HUMAN	sp|P09104|ENOG_HUMAN	14	14	11	sp|P09104|ENOG_HUMAN Gamma-enolase OS=Homo sapiens OX=9606 GN=ENO2 PE=1 SV=3	Gamma-enolase	ENO2	Homo sapiens	1	14	14	11	14	14	14	12	12	13	14	14	14	12	12	13	11	11	11	9	9	10	58.5	58.5	45.9	47.268	434	434	1939-03-01	45	41	35	36	32	40	0	323.31	By MS/MS	By MS/MS	By MS/MS
P78347	sp|P78347|GTF2I_HUMAN	sp|P78347|GTF2I_HUMAN	2	2	2	sp|P78347|GTF2I_HUMAN General transcription factor II-I OS=Homo sapiens OX=9606 GN=GTF2I PE=1 SV=2	General transcription factor II-I	GTF2I	Homo sapiens	1	2	2	2	1	1	1	1	1	2	1	1	1	1	1	2	1	1	1	1	1	2	2022-01-03	2022-01-03	2022-01-03	112.42	998	998	1986-03-01	1	1	1	1	1	2	0	11.922	By MS/MS	By MS/MS	By matching
O60763	sp|O60763|USO1_HUMAN	sp|O60763|USO1_HUMAN	4	4	4	sp|O60763|USO1_HUMAN General vesicular transport factor p115 OS=Homo sapiens OX=9606 GN=USO1 PE=1 SV=2	General vesicular transport factor p115	USO1	Homo sapiens	1	4	4	4	4	4	4	4	4	4	4	4	4	4	4	4	4	4	4	4	4	4	7	7	7	107.89	962	962	2022-06-03	4	4	4	4	4	5	0	27.055	By MS/MS	By MS/MS	By MS/MS
Q9NQX3	sp|Q9NQX3|GEPH_HUMAN	sp|Q9NQX3|GEPH_HUMAN	2	2	2	sp|Q9NQX3|GEPH_HUMAN Gephyrin OS=Homo sapiens OX=9606 GN=GPHN PE=1 SV=1	Gephyrin	GPHN	Homo sapiens	1	2	2	2	1	2	2	2	2	2	1	2	2	2	2	2	1	2	2	2	2	2	2022-03-03	2022-03-03	2022-03-03	79.748	736	736	1973-03-01	1	2	2	2	2	2	0	12.353	By MS/MS	By MS/MS	By matching
P60983	sp|P60983|GMFB_HUMAN	sp|P60983|GMFB_HUMAN	2	2	2	sp|P60983|GMFB_HUMAN Glia maturation factor beta OS=Homo sapiens OX=9606 GN=GMFB PE=1 SV=2	Glia maturation factor beta	GMFB	Homo sapiens	1	2	2	2	2	2	2	1	2	2	2	2	2	1	2	2	2	2	2	1	2	2	2022-09-23	2022-09-23	2022-09-23	16.713	142	142	1945-03-01	2	2	2	1	2	2	0	13.956	By MS/MS	By MS/MS	By MS/MS
P14136	sp|P14136|GFAP_HUMAN	sp|P14136|GFAP_HUMAN	15	14	14	sp|P14136|GFAP_HUMAN Glial fibrillary acidic protein OS=Homo sapiens OX=9606 GN=GFAP PE=1 SV=1	Glial fibrillary acidic protein	GFAP	Homo sapiens	1	15	14	14	14	14	15	14	14	14	14	13	14	14	14	14	14	13	14	14	14	14	2022-04-29	2022-08-27	2022-08-27	49.88	432	432	1949-03-01	18	18	19	17	18	18	0	231.11	By MS/MS	By MS/MS	By MS/MS
P08059	sp|P08059|G6PI_PIG;sp|P06744|G6PI_HUMAN	sp|P08059|G6PI_PIG	17;7	17;7	8;4	sp|P08059|G6PI_PIG Glucose-6-phosphate isomerase OS=Sus scrofa OX=9823 GN=GPI PE=1 SV=3	Glucose-6-phosphate isomerase	GPI	Sus scrofa	2	17	17	8	16	16	16	16	17	17	16	16	16	16	17	17	7	7	7	7	8	8	43.2	43.2	2022-07-21	63.125	558	558;558	1955-03-01	28	29	31	31	32	30	0	323.31	By MS/MS	By MS/MS	By MS/MS
P14314	sp|P14314|GLU2B_HUMAN	sp|P14314|GLU2B_HUMAN	2	2	2	sp|P14314|GLU2B_HUMAN Glucosidase 2 subunit beta OS=Homo sapiens OX=9606 GN=PRKCSH PE=1 SV=2	Glucosidase 2 subunit beta	PRKCSH	Homo sapiens	1	2	2	2	2	2	1	2	2	1	2	2	1	2	2	1	2	2	1	2	2	1	2022-04-04	2022-04-04	2022-04-04	59.425	528	528	2022-03-03	2	2	1	2	2	1	0	12.954	By MS/MS	By MS/MS	By MS/MS
Q05329	sp|Q05329|DCE2_HUMAN;sp|P48321|DCE2_PIG	sp|Q05329|DCE2_HUMAN;sp|P48321|DCE2_PIG	1;1	1;1	1;1	sp|Q05329|DCE2_HUMAN Glutamate decarboxylase 2 OS=Homo sapiens OX=9606 GN=GAD2 PE=1 SV=1;sp|P48321|DCE2_PIG Glutamate decarboxylase 2 OS=Sus scrofa OX=9823 GN=GAD2 PE=2 SV=1	Glutamate decarboxylase 2	GAD2	Homo sapiens	2	1	1	1	1	1	0	1	1	1	1	1	0	1	1	1	1	1	0	1	1	1	2022-08-03	2022-08-03	2022-08-03	65.411	585	585;585	2022-06-03	1	1		1	1	1	0.0033113	69.612	By MS/MS	By MS/MS
P42174	sp|P42174|DHE3_PIG;sp|P00367|DHE3_HUMAN;sp|P49448|DHE4_HUMAN	sp|P42174|DHE3_PIG;sp|P00367|DHE3_HUMAN;sp|P49448|DHE4_HUMAN	19;15;10	19;15;10	19;15;10	sp|P42174|DHE3_PIG Glutamate dehydrogenase 1, mitochondrial OS=Sus scrofa OX=9823 GN=GLUD1 PE=1 SV=2;sp|P00367|DHE3_HUMAN Glutamate dehydrogenase 1, mitochondrial OS=Homo sapiens OX=9606 GN=GLUD1 PE=1 SV=2;sp|P49448|DHE4_HUMAN Glutamate dehydrogenase 2, mi	Glutamate dehydrogenase 1, mitochondrial	GLUD1	Sus scrofa	3	19	19	19	18	18	18	18	15	15	18	18	18	18	15	15	18	18	18	18	15	15	44.4	44.4	44.4	61.307	558	558;558;558	1939-03-01	25	26	27	27	20	22	0	323.31	By MS/MS	By MS/MS	By MS/MS
O94925	sp|O94925|GLSK_HUMAN	sp|O94925|GLSK_HUMAN	6	6	6	sp|O94925|GLSK_HUMAN Glutaminase kidney isoform, mitochondrial OS=Homo sapiens OX=9606 GN=GLS PE=1 SV=1	Glutaminase kidney isoform, mitochondrial	GLS	Homo sapiens	1	6	6	6	5	5	4	5	5	5	5	5	4	5	5	5	5	5	4	5	5	5	2022-09-13	2022-09-13	2022-09-13	73.46	669	669	1951-03-01	6	6	5	6	6	6	0	39.982	By MS/MS	By MS/MS	By MS/MS
P0DPI2	sp|P0DPI2|GAL3A_HUMAN;sp|A0A0B4J2D5|GAL3B_HUMAN	sp|P0DPI2|GAL3A_HUMAN;sp|A0A0B4J2D5|GAL3B_HUMAN	2;2	2;2	2;2	sp|P0DPI2|GAL3A_HUMAN Glutamine amidotransferase-like class 1 domain-containing protein 3A, mitochondrial OS=Homo sapiens OX=9606 GN=GATD3A PE=1 SV=1;sp|A0A0B4J2D5|GAL3B_HUMAN Glutamine amidotransferase-like class 1 domain-containing protein 3B, mitochondr	Glutamine amidotransferase-like class 1 domain-containing protein 3A, mitochondrial	GATD3A	Homo sapiens	2	2	2	2	1	2	2	2	2	2	1	2	2	2	2	2	1	2	2	2	2	2	2022-08-10	2022-08-10	2022-08-10	28.17	268	268;268	1958-03-01	1	3	2	2	2	2	0	24.078	By MS/MS	By MS/MS	By MS/MS
P46410	sp|P46410|GLNA_PIG;sp|P15104|GLNA_HUMAN	sp|P46410|GLNA_PIG;sp|P15104|GLNA_HUMAN	14;10	14;10	14;10	sp|P46410|GLNA_PIG Glutamine synthetase OS=Sus scrofa OX=9823 GN=GLUL PE=2 SV=3;sp|P15104|GLNA_HUMAN Glutamine synthetase OS=Homo sapiens OX=9606 GN=GLUL PE=1 SV=4	Glutamine synthetase	GLUL	Sus scrofa	2	14	14	14	14	14	14	13	13	13	14	14	14	13	13	13	14	14	14	13	13	13	44	44	44	42.03	373	373;373	1944-03-01	50	48	50	47	43	47	0	323.31	By MS/MS	By MS/MS	By MS/MS
Q03013	sp|Q03013|GSTM4_HUMAN;sp|P09488|GSTM1_HUMAN;sp|P46439|GSTM5_HUMAN;sp|P28161|GSTM2_HUMAN	sp|Q03013|GSTM4_HUMAN;sp|P09488|GSTM1_HUMAN;sp|P46439|GSTM5_HUMAN;sp|P28161|GSTM2_HUMAN	2;2;1;1	2;2;1;1	2;2;1;1	sp|Q03013|GSTM4_HUMAN Glutathione S-transferase Mu 4 OS=Homo sapiens OX=9606 GN=GSTM4 PE=1 SV=3;sp|P09488|GSTM1_HUMAN Glutathione S-transferase Mu 1 OS=Homo sapiens OX=9606 GN=GSTM1 PE=1 SV=3;sp|P46439|GSTM5_HUMAN Glutathione S-transferase Mu 5 OS=Homo sap	Glutathione S-transferase Mu 4	GSTM4	Homo sapiens	4	2	2	2	2	2	2	2	2	2	2	2	2	2	2	2	2	2	2	2	2	2	2022-08-13	2022-08-13	2022-08-13	25.561	218	218;218;218;218	1962-03-01	2	2	2	2	3	2	0	52.729	By MS/MS	By MS/MS	By MS/MS
P80031	sp|P80031|GSTP1_PIG	sp|P80031|GSTP1_PIG	10	10	10	sp|P80031|GSTP1_PIG Glutathione S-transferase P OS=Sus scrofa OX=9823 GN=GSTP1 PE=1 SV=2	Glutathione S-transferase P	GSTP1	Sus scrofa	1	10	10	10	9	9	10	9	9	9	9	9	10	9	9	9	9	9	10	9	9	9	60.9	60.9	60.9	23.497	207	207	1943-03-01	22	25	26	21	24	20	0	323.31	By MS/MS	By MS/MS	By MS/MS
P00355	sp|P00355|G3P_PIG;sp|P04406|G3P_HUMAN	sp|P00355|G3P_PIG	13;5	13;5	13;5	sp|P00355|G3P_PIG Glyceraldehyde-3-phosphate dehydrogenase OS=Sus scrofa OX=9823 GN=GAPDH PE=1 SV=4	Glyceraldehyde-3-phosphate dehydrogenase	GAPDH	Sus scrofa	2	13	13	13	12	13	13	12	12	12	12	13	13	12	12	12	12	13	13	12	12	12	60.1	60.1	60.1	35.836	333	333;335	1947-03-01	70	79	77	75	75	68	0	323.31	By MS/MS	By MS/MS	By MS/MS
P43304	sp|P43304|GPDM_HUMAN	sp|P43304|GPDM_HUMAN	2	2	2	sp|P43304|GPDM_HUMAN Glycerol-3-phosphate dehydrogenase, mitochondrial OS=Homo sapiens OX=9606 GN=GPD2 PE=1 SV=3	Glycerol-3-phosphate dehydrogenase, mitochondrial	GPD2	Homo sapiens	1	2	2	2	1	2	2	1	2	1	1	2	2	1	2	1	1	2	2	1	2	1	2022-08-04	2022-08-04	2022-08-04	80.852	727	727	1944-03-01	1	2	2	1	2	1	0.0012987	1932-11-01	By MS/MS	By MS/MS	By MS/MS
P23434	sp|P23434|GCSH_HUMAN	sp|P23434|GCSH_HUMAN	2	2	2	sp|P23434|GCSH_HUMAN Glycine cleavage system H protein, mitochondrial OS=Homo sapiens OX=9606 GN=GCSH PE=1 SV=2	Glycine cleavage system H protein, mitochondrial	GCSH	Homo sapiens	1	2	2	2	2	2	2	2	2	2	2	2	2	2	2	2	2	2	2	2	2	2	2022-03-17	2022-03-17	2022-03-17	18.884	173	173	2022-05-03	2	2	2	2	2	2	0	17.048	By MS/MS	By MS/MS	By MS/MS
P35573	sp|P35573|GDE_HUMAN	sp|P35573|GDE_HUMAN	4	4	4	sp|P35573|GDE_HUMAN Glycogen debranching enzyme OS=Homo sapiens OX=9606 GN=AGL PE=1 SV=3	Glycogen debranching enzyme	AGL	Homo sapiens	1	4	4	4	2	3	3	4	3	3	2	3	3	4	3	3	2	3	3	4	3	3	2022-04-04	2022-04-04	2022-04-04	174.76	1532	1532	1967-03-01	2	3	3	4	3	3	0	28.778	By MS/MS	By MS/MS	By matching
P11216	sp|P11216|PYGB_HUMAN;sp|P11217|PYGM_HUMAN	sp|P11216|PYGB_HUMAN	5;2	5;2	5;2	sp|P11216|PYGB_HUMAN Glycogen phosphorylase, brain form OS=Homo sapiens OX=9606 GN=PYGB PE=1 SV=5	Glycogen phosphorylase, brain form	PYGB	Homo sapiens	2	5	5	5	5	5	4	4	4	4	5	5	4	4	4	4	5	5	4	4	4	4	2022-09-07	2022-09-07	2022-09-07	96.695	843	843;842	1935-03-01	5	5	4	4	4	4	0	30.214	By MS/MS	By MS/MS	By MS/MS
P49841	sp|P49841|GSK3B_HUMAN	sp|P49841|GSK3B_HUMAN	1	1	1	sp|P49841|GSK3B_HUMAN Glycogen synthase kinase-3 beta OS=Homo sapiens OX=9606 GN=GSK3B PE=1 SV=2	Glycogen synthase kinase-3 beta	GSK3B	Homo sapiens	1	1	1	1	0	0	0	0	1	1	0	0	0	0	1	1	0	0	0	0	1	1	2022-07-05	2022-07-05	2022-07-05	46.744	420	420	2022-05-05					1	1	0.004329	6.758
P46976	sp|P46976|GLYG_HUMAN	sp|P46976|GLYG_HUMAN	3	3	3	sp|P46976|GLYG_HUMAN Glycogenin-1 OS=Homo sapiens OX=9606 GN=GYG1 PE=1 SV=4	Glycogenin-1	GYG1	Homo sapiens	1	3	3	3	3	2	2	2	2	2	3	2	2	2	2	2	3	2	2	2	2	2	2022-06-12	2022-06-12	2022-06-12	39.383	350	350	1931-03-01	3	2	2	2	2	2	0	23.262	By MS/MS	By MS/MS	By MS/MS
Q92896	sp|Q92896|GSLG1_HUMAN	sp|Q92896|GSLG1_HUMAN	2	2	2	sp|Q92896|GSLG1_HUMAN Golgi apparatus protein 1 OS=Homo sapiens OX=9606 GN=GLG1 PE=1 SV=2	Golgi apparatus protein 1	GLG1	Homo sapiens	1	2	2	2	0	1	1	0	1	2	0	1	1	0	1	2	0	1	1	0	1	2	2022-02-02	2022-02-02	2022-02-02	134.55	1179	1179	2017-04-01		1	2		1	2	0	13.512		By MS/MS	By MS/MS
Q9H8Y8	sp|Q9H8Y8|GORS2_HUMAN	sp|Q9H8Y8|GORS2_HUMAN	1	1	1	sp|Q9H8Y8|GORS2_HUMAN Golgi reassembly-stacking protein 2 OS=Homo sapiens OX=9606 GN=GORASP2 PE=1 SV=3	Golgi reassembly-stacking protein 2	GORASP2	Homo sapiens	1	1	1	1	1	1	1	0	0	0	1	1	1	0	0	0	1	1	1	0	0	0	2022-07-02	2022-07-02	2022-07-02	47.145	452	452	2	1	1	1				0.0053648	66.871	By matching	By MS/MS	By MS/MS
Q9UIJ7	sp|Q9UIJ7|KAD3_HUMAN	sp|Q9UIJ7|KAD3_HUMAN	2	2	2	sp|Q9UIJ7|KAD3_HUMAN GTP:AMP phosphotransferase AK3, mitochondrial OS=Homo sapiens OX=9606 GN=AK3 PE=1 SV=4	GTP:AMP phosphotransferase AK3, mitochondrial	AK3	Homo sapiens	1	2	2	2	1	2	1	0	0	0	1	2	1	0	0	0	1	2	1	0	0	0	2022-07-09	2022-07-09	2022-07-09	25.565	227	227	2	1	2	1				0	12.623	By MS/MS	By MS/MS	By MS/MS
P01116	sp|P01116|RASK_HUMAN;sp|P01112|RASH_HUMAN;sp|Q2MJK3|RASN_PIG;sp|P01111|RASN_HUMAN	sp|P01116|RASK_HUMAN;sp|P01112|RASH_HUMAN;sp|Q2MJK3|RASN_PIG;sp|P01111|RASN_HUMAN	2;2;1;1	2;2;1;1	2;2;1;1	sp|P01116|RASK_HUMAN GTPase KRas OS=Homo sapiens OX=9606 GN=KRAS PE=1 SV=1;sp|P01112|RASH_HUMAN GTPase HRas OS=Homo sapiens OX=9606 GN=HRAS PE=1 SV=1;sp|Q2MJK3|RASN_PIG GTPase NRas OS=Sus scrofa OX=9823 GN=NRAS PE=2 SV=1;sp|P01111|RASN_HUMAN GTPase NRas OS	GTPase KRas	KRAS	Homo sapiens	4	2	2	2	1	1	2	1	1	1	1	1	2	1	1	1	1	1	2	1	1	1	2022-02-21	2022-02-21	2022-02-21	21.656	189	189;189;189;189	1943-03-01	1	1	2	1	1	1	0	13.775	By MS/MS	By MS/MS	By MS/MS
P62826	sp|P62826|RAN_HUMAN	sp|P62826|RAN_HUMAN	5	5	5	sp|P62826|RAN_HUMAN GTP-binding nuclear protein Ran OS=Homo sapiens OX=9606 GN=RAN PE=1 SV=3	GTP-binding nuclear protein Ran	RAN	Homo sapiens	1	5	5	5	5	4	5	5	5	5	5	4	5	5	5	5	5	4	5	5	5	5	2022-09-26	2022-09-26	2022-09-26	24.423	216	216	1952-03-01	6	5	5	6	5	6	0	79.54	By MS/MS	By MS/MS	By MS/MS
Q9NR31	sp|Q9NR31|SAR1A_HUMAN;sp|Q52NJ3|SAR1A_PIG	sp|Q9NR31|SAR1A_HUMAN;sp|Q52NJ3|SAR1A_PIG	1;1	1;1	1;1	sp|Q9NR31|SAR1A_HUMAN GTP-binding protein SAR1a OS=Homo sapiens OX=9606 GN=SAR1A PE=1 SV=1;sp|Q52NJ3|SAR1A_PIG GTP-binding protein SAR1a OS=Sus scrofa OX=9823 GN=SAR1A PE=2 SV=1	GTP-binding protein SAR1a	SAR1A	Homo sapiens	2	1	1	1	0	1	0	0	0	0	0	1	0	0	0	0	0	1	0	0	0	0	2022-02-17	2022-02-17	2022-02-17	22.367	198	198;198	2		1					0.0024361	85.117		By MS/MS
P04899	sp|P04899|GNAI2_HUMAN;sp|P08754|GNAI3_HUMAN;sp|P38405|GNAL_HUMAN	sp|P04899|GNAI2_HUMAN	8;2;1	7;1;0	6;0;0	sp|P04899|GNAI2_HUMAN Guanine nucleotide-binding protein G(i) subunit alpha-2 OS=Homo sapiens OX=9606 GN=GNAI2 PE=1 SV=3	Guanine nucleotide-binding protein G(i) subunit alpha-2	GNAI2	Homo sapiens	3	8	7	6	8	7	8	8	6	6	7	6	7	7	5	5	6	5	6	6	4	4	2022-07-30	2022-06-27	2022-02-24	40.45	355	355;354;381	1932-03-01	7	6	7	7	5	5	0	89.902	By MS/MS	By MS/MS	By MS/MS
P59768	sp|P59768|GBG2_HUMAN	sp|P59768|GBG2_HUMAN	3	3	3	sp|P59768|GBG2_HUMAN Guanine nucleotide-binding protein G(I)/G(S)/G(O) subunit gamma-2 OS=Homo sapiens OX=9606 GN=GNG2 PE=1 SV=2	Guanine nucleotide-binding protein G(I)/G(S)/G(O) subunit gamma-2	GNG2	Homo sapiens	1	3	3	3	3	3	3	2	3	3	3	3	3	2	3	3	3	3	3	2	3	3	59.2	59.2	59.2	78.501	71	71	1947-03-01	3	3	3	2	3	3	0	48.081	By MS/MS	By MS/MS	By MS/MS
O60262	sp|O60262|GBG7_HUMAN	sp|O60262|GBG7_HUMAN	1	1	1	sp|O60262|GBG7_HUMAN Guanine nucleotide-binding protein G(I)/G(S)/G(O) subunit gamma-7 OS=Homo sapiens OX=9606 GN=GNG7 PE=1 SV=1	Guanine nucleotide-binding protein G(I)/G(S)/G(O) subunit gamma-7	GNG7	Homo sapiens	1	1	1	1	1	1	1	1	1	1	1	1	1	1	1	1	1	1	1	1	1	1	2022-05-23	2022-05-23	2022-05-23	75.217	68	68	2022-05-03	1	1	1	1	1	1	0.0023364	76.603	By MS/MS	By MS/MS	By MS/MS
P62873	sp|P62873|GBB1_HUMAN	sp|P62873|GBB1_HUMAN	14	14	8	sp|P62873|GBB1_HUMAN Guanine nucleotide-binding protein G(I)/G(S)/G(T) subunit beta-1 OS=Homo sapiens OX=9606 GN=GNB1 PE=1 SV=3	Guanine nucleotide-binding protein G(I)/G(S)/G(T) subunit beta-1	GNB1	Homo sapiens	1	14	14	8	13	14	13	13	10	12	13	14	13	13	10	12	7	8	8	8	5	7	62.1	62.1	33.8	37.377	340	340	1939-03-01	22	24	22	21	18	20	0	323.31	By MS/MS	By MS/MS	By MS/MS
P62879	sp|P62879|GBB2_HUMAN	sp|P62879|GBB2_HUMAN	8	3	2	sp|P62879|GBB2_HUMAN Guanine nucleotide-binding protein G(I)/G(S)/G(T) subunit beta-2 OS=Homo sapiens OX=9606 GN=GNB2 PE=1 SV=3	Guanine nucleotide-binding protein G(I)/G(S)/G(T) subunit beta-2	GNB2	Homo sapiens	1	8	3	2	8	8	7	7	7	7	3	3	3	3	3	3	2	2	2	2	2	2	2022-03-30	2022-02-11	2022-01-09	37.331	340	340	2022-05-03	3	3	3	3	3	3	0	18.709	By MS/MS	By MS/MS	By MS/MS
P16520	sp|P16520|GBB3_HUMAN	sp|P16520|GBB3_HUMAN	6	5	5	sp|P16520|GBB3_HUMAN Guanine nucleotide-binding protein G(I)/G(S)/G(T) subunit beta-3 OS=Homo sapiens OX=9606 GN=GNB3 PE=1 SV=1	Guanine nucleotide-binding protein G(I)/G(S)/G(T) subunit beta-3	GNB3	Homo sapiens	1	6	5	5	6	6	6	4	5	5	5	5	5	3	4	4	5	5	5	3	4	4	35.6	32.6	32.6	37.221	340	340	1942-03-01	5	6	6	4	5	5	0	91.375	By MS/MS	By MS/MS	By MS/MS
P09471	sp|P09471|GNAO_HUMAN	sp|P09471|GNAO_HUMAN	7	5	5	sp|P09471|GNAO_HUMAN Guanine nucleotide-binding protein G(o) subunit alpha OS=Homo sapiens OX=9606 GN=GNAO1 PE=1 SV=4	Guanine nucleotide-binding protein G(o) subunit alpha	GNAO1	Homo sapiens	1	7	5	5	7	7	7	7	7	7	5	5	5	5	5	5	5	5	5	5	5	5	2022-06-26	2022-01-20	2022-01-20	40.05	354	354	1952-03-01	5	5	5	6	5	5	0	271.09	By MS/MS	By MS/MS	By MS/MS
P63092	sp|P63092|GNAS2_HUMAN;sp|Q5JWF2|GNAS1_HUMAN;sp|P29797|GNAS_PIG	sp|P63092|GNAS2_HUMAN;sp|Q5JWF2|GNAS1_HUMAN;sp|P29797|GNAS_PIG	4;4;3	3;3;2	3;3;2	sp|P63092|GNAS2_HUMAN Guanine nucleotide-binding protein G(s) subunit alpha isoforms short OS=Homo sapiens OX=9606 GN=GNAS PE=1 SV=1;sp|Q5JWF2|GNAS1_HUMAN Guanine nucleotide-binding protein G(s) subunit alpha isoforms XLas OS=Homo sapiens OX=9606 GN=GNAS P	Guanine nucleotide-binding protein G(s) subunit alpha isoforms short	GNAS	Homo sapiens	3	4	3	3	2	4	4	4	4	4	1	3	3	3	3	3	1	3	3	3	3	3	2022-02-14	2022-04-11	2022-04-11	45.664	394	394;1037;397	1981-03-01	1	3	3	3	3	3	0	17.395	By matching	By MS/MS	By MS/MS
P11488	sp|P11488|GNAT1_HUMAN;sp|A8MTJ3|GNAT3_HUMAN;sp|P19087|GNAT2_HUMAN	sp|P11488|GNAT1_HUMAN	10;4;3	10;4;3	9;3;2	sp|P11488|GNAT1_HUMAN Guanine nucleotide-binding protein G(t) subunit alpha-1 OS=Homo sapiens OX=9606 GN=GNAT1 PE=1 SV=5	Guanine nucleotide-binding protein G(t) subunit alpha-1	GNAT1	Homo sapiens	3	10	10	9	10	10	10	9	10	10	10	10	10	9	10	10	9	9	9	8	9	9	40.6	40.6	37.4	40.04	350	350;354;354	1948-03-01	14	15	18	13	14	15	0	323.31	By MS/MS	By MS/MS	By MS/MS
P63211	sp|P63211|GBG1_HUMAN	sp|P63211|GBG1_HUMAN	3	3	2	sp|P63211|GBG1_HUMAN Guanine nucleotide-binding protein G(T) subunit gamma-T1 OS=Homo sapiens OX=9606 GN=GNGT1 PE=1 SV=2	Guanine nucleotide-binding protein G(T) subunit gamma-T1	GNGT1	Homo sapiens	1	3	3	2	3	2	2	2	2	2	3	2	2	2	2	2	2	2	2	2	2	2	2022-04-28	2022-04-28	2022-06-17	84.958	74	74	1942-03-01	6	5	5	5	5	5	0	189.29	By MS/MS	By MS/MS	By MS/MS
Q02153	sp|Q02153|GCYB1_HUMAN	sp|Q02153|GCYB1_HUMAN	2	2	2	sp|Q02153|GCYB1_HUMAN Guanylate cyclase soluble subunit beta-1 OS=Homo sapiens OX=9606 GN=GUCY1B1 PE=1 SV=1	Guanylate cyclase soluble subunit beta-1	GUCY1B1	Homo sapiens	1	2	2	2	2	2	2	2	2	2	2	2	2	2	2	2	2	2	2	2	2	2	2022-02-04	2022-02-04	2022-02-04	70.514	619	619	2022-05-03	2	2	2	2	2	2	0	11.832	By MS/MS	By MS/MS	By MS/MS
P31006	sp|P31006|KGUA_PIG;sp|Q16774|KGUA_HUMAN	sp|P31006|KGUA_PIG	7;3	7;3	7;3	sp|P31006|KGUA_PIG Guanylate kinase OS=Sus scrofa OX=9823 GN=GUK1 PE=1 SV=2	Guanylate kinase	GUK1	Sus scrofa	2	7	7	7	6	7	7	7	6	6	6	7	7	7	6	6	6	7	7	7	6	6	56.6	56.6	56.6	21.921	198	198;197	2022-05-03	9	10	11	11	10	9	0	104.06	By MS/MS	By MS/MS	By MS/MS
O43301	sp|O43301|HS12A_HUMAN;sp|Q96MM6|HS12B_HUMAN	sp|O43301|HS12A_HUMAN;sp|Q96MM6|HS12B_HUMAN	2;1	2;1	2;1	sp|O43301|HS12A_HUMAN Heat shock 70 kDa protein 12A OS=Homo sapiens OX=9606 GN=HSPA12A PE=1 SV=2;sp|Q96MM6|HS12B_HUMAN Heat shock 70 kDa protein 12B OS=Homo sapiens OX=9606 GN=HSPA12B PE=1 SV=2	Heat shock 70 kDa protein 12A	HSPA12A	Homo sapiens	2	2	2	2	2	2	2	1	2	2	2	2	2	1	2	2	2	2	2	1	2	2	2022-01-04	2022-01-04	2022-01-04	74.977	675	675;686	1945-03-01	2	2	2	1	2	2	0	13.383	By MS/MS	By MS/MS	By MS/MS
Q6S4N2	sp|Q6S4N2|HS71B_PIG;sp|P0DMV9|HS71B_HUMAN;sp|P0DMV8|HS71A_HUMAN;sp|P34930|HS71A_PIG;sp|P34934|HSP7X_PIG	sp|Q6S4N2|HS71B_PIG;sp|P0DMV9|HS71B_HUMAN;sp|P0DMV8|HS71A_HUMAN;sp|P34930|HS71A_PIG	20;14;14;13;1	19;13;13;13;1	12;6;6;7;0	sp|Q6S4N2|HS71B_PIG Heat shock 70 kDa protein 1B OS=Sus scrofa OX=9823 GN=HSPA1B PE=2 SV=1;sp|P0DMV9|HS71B_HUMAN Heat shock 70 kDa protein 1B OS=Homo sapiens OX=9606 GN=HSPA1B PE=1 SV=1;sp|P0DMV8|HS71A_HUMAN Heat shock 70 kDa protein 1A OS=Homo sapiens OX=	Heat shock 70 kDa protein 1B	HSPA1B	Sus scrofa	5	20	19	12	18	18	17	18	17	20	17	17	16	17	16	19	10	10	10	10	11	12	46.5	44.5	2022-07-26	70.097	641	641;641;641;641;379	1947-03-01	20	22	20	20	18	21	0	323.31	By MS/MS	By MS/MS	By MS/MS
P34932	sp|P34932|HSP74_HUMAN	sp|P34932|HSP74_HUMAN	12	12	11	sp|P34932|HSP74_HUMAN Heat shock 70 kDa protein 4 OS=Homo sapiens OX=9606 GN=HSPA4 PE=1 SV=4	Heat shock 70 kDa protein 4	HSPA4	Homo sapiens	1	12	12	11	10	11	11	10	9	8	10	11	11	10	9	8	9	10	10	9	9	8	23	23	2022-01-21	94.33	840	840	2029-03-01	11	12	12	10	9	8	0	129.91	By MS/MS	By MS/MS	By MS/MS
O95757	sp|O95757|HS74L_HUMAN	sp|O95757|HS74L_HUMAN	8	7	6	sp|O95757|HS74L_HUMAN Heat shock 70 kDa protein 4L OS=Homo sapiens OX=9606 GN=HSPA4L PE=1 SV=3	Heat shock 70 kDa protein 4L	HSPA4L	Homo sapiens	1	8	7	6	8	8	7	7	6	6	7	7	6	6	6	6	6	6	5	5	5	5	15	2022-01-13	2022-04-11	94.511	839	839	1936-03-01	7	8	6	6	6	6	0	57.007	By MS/MS	By MS/MS	By MS/MS
Q04967	sp|Q04967|HSP76_PIG	sp|Q04967|HSP76_PIG	6	1	0	sp|Q04967|HSP76_PIG Heat shock 70 kDa protein 6 OS=Sus scrofa OX=9823 GN=HSPA6 PE=1 SV=1	Heat shock 70 kDa protein 6	HSPA6	Sus scrofa	1	6	1	0	6	6	6	6	6	6	1	1	1	1	1	1	0	0	0	0	0	0	14	2022-07-01	0	71.108	643	643	2022-05-03	2	2	2	2	2	2	0	35.285	By MS/MS	By MS/MS	By MS/MS
P11142	sp|P11142|HSP7C_HUMAN;sp|P54652|HSP72_HUMAN	sp|P11142|HSP7C_HUMAN	21;6	21;6	17;3	sp|P11142|HSP7C_HUMAN Heat shock cognate 71 kDa protein OS=Homo sapiens OX=9606 GN=HSPA8 PE=1 SV=1	Heat shock cognate 71 kDa protein	HSPA8	Homo sapiens	2	21	21	17	20	21	21	19	19	19	20	21	21	19	19	19	16	17	17	15	15	15	42.1	42.1	35	70.897	646	646;639	1946-03-01	31	31	31	31	28	30	0	323.31	By MS/MS	By MS/MS	By MS/MS
Q92598	sp|Q92598|HS105_HUMAN	sp|Q92598|HS105_HUMAN	7	6	6	sp|Q92598|HS105_HUMAN Heat shock protein 105 kDa OS=Homo sapiens OX=9606 GN=HSPH1 PE=1 SV=1	Heat shock protein 105 kDa	HSPH1	Homo sapiens	1	7	6	6	6	6	6	6	6	6	5	5	5	5	5	5	5	5	5	5	5	5	2022-03-11	2022-07-09	2022-07-09	96.864	858	858	2022-05-03	5	5	5	5	5	5	0	65.443	By MS/MS	By MS/MS	By MS/MS
Q5S1U1	sp|Q5S1U1|HSPB1_PIG	sp|Q5S1U1|HSPB1_PIG	6	5	5	sp|Q5S1U1|HSPB1_PIG Heat shock protein beta-1 OS=Sus scrofa OX=9823 GN=HSPB1 PE=2 SV=1	Heat shock protein beta-1	HSPB1	Sus scrofa	1	6	5	5	6	6	5	5	4	4	5	5	4	4	3	3	5	5	4	4	3	3	40.6	36.2	36.2	22.941	207	207	2023-03-01	6	6	5	5	4	4	0	48.534	By MS/MS	By MS/MS	By MS/MS
O02705	sp|O02705|HS90A_PIG;sp|P07900|HS90A_HUMAN;sp|Q14568|HS902_HUMAN;sp|Q58FG0|HS905_HUMAN;sp|Q58FF8|H90B2_HUMAN;sp|Q58FG1|HS904_HUMAN	sp|O02705|HS90A_PIG;sp|P07900|HS90A_HUMAN	32;29;6;4;3;1	32;29;6;4;3;1	22;19;2;2;0;0	sp|O02705|HS90A_PIG Heat shock protein HSP 90-alpha OS=Sus scrofa OX=9823 GN=HSP90AA1 PE=2 SV=3;sp|P07900|HS90A_HUMAN Heat shock protein HSP 90-alpha OS=Homo sapiens OX=9606 GN=HSP90AA1 PE=1 SV=5	Heat shock protein HSP 90-alpha	HSP90AA1	Sus scrofa	6	32	32	22	32	32	32	32	31	30	32	32	32	32	31	30	22	22	22	22	22	21	51	51	35.9	84.774	733	733;732;343;334;381;418	2022-04-03	55	55	57	53	47	48	0	323.31	By MS/MS	By MS/MS	By MS/MS
P08238	sp|P08238|HS90B_HUMAN;sp|Q58FF7|H90B3_HUMAN	sp|P08238|HS90B_HUMAN	19;6	9;1	8;1	sp|P08238|HS90B_HUMAN Heat shock protein HSP 90-beta OS=Homo sapiens OX=9606 GN=HSP90AB1 PE=1 SV=4	Heat shock protein HSP 90-beta	HSP90AB1	Homo sapiens	2	19	9	8	19	19	19	19	17	17	9	9	9	9	8	8	8	8	8	8	7	7	33.1	2022-08-17	2022-02-16	83.263	724	724;597	1935-03-01	13	14	14	13	10	11	0	323.31	By MS/MS	By MS/MS	By MS/MS
P01965	sp|P01965|HBA_PIG;CON__P01966	sp|P01965|HBA_PIG	6;1	6;1	6;1	sp|P01965|HBA_PIG Hemoglobin subunit alpha OS=Sus scrofa OX=9823 GN=HBA PE=1 SV=1	Hemoglobin subunit alpha	HBA	Sus scrofa	2	6	6	6	6	6	6	6	6	6	6	6	6	6	6	6	6	6	6	6	6	6	72.3	72.3	72.3	15.039	141	141;142	1951-03-01	38	44	42	40	40	42	0	323.31	By MS/MS	By MS/MS	By MS/MS
P02067	sp|P02067|HBB_PIG;sp|P68871|HBB_HUMAN;sp|P02042|HBD_HUMAN;sp|P04246|HBT_PIG;sp|P69892|HBG2_HUMAN;sp|P69891|HBG1_HUMAN;sp|P02101|HBE_PIG;sp|P02100|HBE_HUMAN	sp|P02067|HBB_PIG	7;3;2;1;1;1;1;1	7;3;2;1;1;1;1;1	6;2;1;0;0;0;0;0	sp|P02067|HBB_PIG Hemoglobin subunit beta OS=Sus scrofa OX=9823 GN=HBB PE=1 SV=3	Hemoglobin subunit beta	HBB	Sus scrofa	8	7	7	6	7	7	7	7	7	7	7	7	7	7	7	7	6	6	6	6	6	6	55.8	55.8	49	16.165	147	147;147;147;146;147;147;147;147	1962-03-01	34	32	37	39	35	42	0	323.31	By MS/MS	By MS/MS	By MS/MS
P51858	sp|P51858|HDGF_HUMAN	sp|P51858|HDGF_HUMAN	3	3	3	sp|P51858|HDGF_HUMAN Hepatoma-derived growth factor OS=Homo sapiens OX=9606 GN=HDGF PE=1 SV=1	Hepatoma-derived growth factor	HDGF	Homo sapiens	1	3	3	3	3	3	3	2	2	2	3	3	3	2	2	2	3	3	3	2	2	2	2022-01-17	2022-01-17	2022-01-17	26.788	240	240	2029-03-01	4	4	4	3	3	3	0	71.011	By MS/MS	By MS/MS	By MS/MS
Q9Y3E1	sp|Q9Y3E1|HDGR3_HUMAN;sp|Q7Z4V5|HDGR2_HUMAN	sp|Q9Y3E1|HDGR3_HUMAN	3;1	3;1	3;1	sp|Q9Y3E1|HDGR3_HUMAN Hepatoma-derived growth factor-related protein 3 OS=Homo sapiens OX=9606 GN=HDGFL3 PE=1 SV=1	Hepatoma-derived growth factor-related protein 3	HDGFL3	Homo sapiens	2	3	3	3	3	3	3	3	3	3	3	3	3	3	3	3	3	3	3	3	3	3	2022-06-23	2022-06-23	2022-06-23	22.619	203	203;671	1946-03-01	4	4	5	3	4	4	0	74.156	By MS/MS	By MS/MS	By MS/MS
P09651	sp|P09651|ROA1_HUMAN;sp|Q32P51|RA1L2_HUMAN	sp|P09651|ROA1_HUMAN;sp|Q32P51|RA1L2_HUMAN	5;3	5;3	5;3	sp|P09651|ROA1_HUMAN Heterogeneous nuclear ribonucleoprotein A1 OS=Homo sapiens OX=9606 GN=HNRNPA1 PE=1 SV=5;sp|Q32P51|RA1L2_HUMAN Heterogeneous nuclear ribonucleoprotein A1-like 2 OS=Homo sapiens OX=9606 GN=HNRNPA1L2 PE=2 SV=2	Heterogeneous nuclear ribonucleoprotein A1	HNRNPA1	Homo sapiens	2	5	5	5	4	4	4	4	4	5	4	4	4	4	4	5	4	4	4	4	4	5	2022-01-19	2022-01-19	2022-01-19	38.746	372	372;320	2022-06-03	4	4	4	4	4	5	0	64.013	By MS/MS	By MS/MS	By MS/MS
P51991	sp|P51991|ROA3_HUMAN	sp|P51991|ROA3_HUMAN	4	4	4	sp|P51991|ROA3_HUMAN Heterogeneous nuclear ribonucleoprotein A3 OS=Homo sapiens OX=9606 GN=HNRNPA3 PE=1 SV=2	Heterogeneous nuclear ribonucleoprotein A3	HNRNPA3	Homo sapiens	1	4	4	4	4	4	4	4	4	3	4	4	4	4	4	3	4	4	4	4	4	3	2022-07-16	2022-07-16	2022-07-16	39.594	378	378	1942-03-01	4	4	4	5	4	3	0	44.693	By MS/MS	By MS/MS	By MS/MS
Q14103	sp|Q14103|HNRPD_HUMAN	sp|Q14103|HNRPD_HUMAN	4	4	4	sp|Q14103|HNRPD_HUMAN Heterogeneous nuclear ribonucleoprotein D0 OS=Homo sapiens OX=9606 GN=HNRNPD PE=1 SV=1	Heterogeneous nuclear ribonucleoprotein D0	HNRNPD	Homo sapiens	1	4	4	4	3	3	3	4	4	4	3	3	3	4	4	4	3	3	3	4	4	4	2022-08-15	2022-08-15	2022-08-15	38.434	355	355	1974-03-01	4	4	5	7	5	6	0	93.028	By MS/MS	By MS/MS	By MS/MS
O14979	sp|O14979|HNRDL_HUMAN	sp|O14979|HNRDL_HUMAN	1	1	1	sp|O14979|HNRDL_HUMAN Heterogeneous nuclear ribonucleoprotein D-like OS=Homo sapiens OX=9606 GN=HNRNPDL PE=1 SV=3	Heterogeneous nuclear ribonucleoprotein D-like	HNRNPDL	Homo sapiens	1	1	1	1	1	1	1	1	1	1	1	1	1	1	1	1	1	1	1	1	1	1	2022-08-03	2022-08-03	2022-08-03	46.437	420	420	2022-05-03	1	1	1	1	1	1	0.0023838	80.474	By MS/MS	By MS/MS	By MS/MS
P52597	sp|P52597|HNRPF_HUMAN	sp|P52597|HNRPF_HUMAN	3	1	1	sp|P52597|HNRPF_HUMAN Heterogeneous nuclear ribonucleoprotein F OS=Homo sapiens OX=9606 GN=HNRNPF PE=1 SV=3	Heterogeneous nuclear ribonucleoprotein F	HNRNPF	Homo sapiens	1	3	1	1	3	3	3	3	3	3	1	1	1	1	1	1	1	1	1	1	1	1	2022-06-10	2022-01-04	2022-01-04	45.671	415	415	2022-05-03	1	1	1	1	1	1	0.002442	8.525	By MS/MS	By MS/MS	By MS/MS
P31943	sp|P31943|HNRH1_HUMAN;sp|P55795|HNRH2_HUMAN	sp|P31943|HNRH1_HUMAN;sp|P55795|HNRH2_HUMAN	6;3	6;3	4;2	sp|P31943|HNRH1_HUMAN Heterogeneous nuclear ribonucleoprotein H OS=Homo sapiens OX=9606 GN=HNRNPH1 PE=1 SV=4;sp|P55795|HNRH2_HUMAN Heterogeneous nuclear ribonucleoprotein H2 OS=Homo sapiens OX=9606 GN=HNRNPH2 PE=1 SV=1	Heterogeneous nuclear ribonucleoprotein H	HNRNPH1	Homo sapiens	2	6	6	4	6	5	6	6	6	6	6	5	6	6	6	6	4	3	4	4	4	4	2022-08-19	2022-08-19	2022-08-13	49.229	449	449;449	1954-03-01	6	5	6	6	6	6	0	85.954	By MS/MS	By MS/MS	By MS/MS
P61978	sp|P61978|HNRPK_HUMAN	sp|P61978|HNRPK_HUMAN	12	12	12	sp|P61978|HNRPK_HUMAN Heterogeneous nuclear ribonucleoprotein K OS=Homo sapiens OX=9606 GN=HNRNPK PE=1 SV=1	Heterogeneous nuclear ribonucleoprotein K	HNRNPK	Homo sapiens	1	12	12	12	11	12	12	10	9	10	11	12	12	10	9	10	11	12	12	10	9	10	39.1	39.1	39.1	50.976	463	463	1943-03-01	12	13	14	15	11	11	0	289.43	By MS/MS	By MS/MS	By MS/MS
P14866	sp|P14866|HNRPL_HUMAN	sp|P14866|HNRPL_HUMAN	5	5	5	sp|P14866|HNRPL_HUMAN Heterogeneous nuclear ribonucleoprotein L OS=Homo sapiens OX=9606 GN=HNRNPL PE=1 SV=2	Heterogeneous nuclear ribonucleoprotein L	HNRNPL	Homo sapiens	1	5	5	5	5	5	4	3	3	4	5	5	4	3	3	4	5	5	4	3	3	4	2022-06-16	2022-06-16	2022-06-16	64.132	589	589	2025-03-01	5	5	4	3	3	4	0	32.812	By MS/MS	By MS/MS	By MS/MS
P52272	sp|P52272|HNRPM_HUMAN	sp|P52272|HNRPM_HUMAN	4	4	4	sp|P52272|HNRPM_HUMAN Heterogeneous nuclear ribonucleoprotein M OS=Homo sapiens OX=9606 GN=HNRNPM PE=1 SV=3	Heterogeneous nuclear ribonucleoprotein M	HNRNPM	Homo sapiens	1	4	4	4	3	3	4	4	2	3	3	3	4	4	2	3	3	3	4	4	2	3	2022-02-09	2022-02-09	2022-02-09	77.515	730	730	1942-03-01	3	3	4	4	2	3	0	27.278	By MS/MS	By MS/MS	By MS/MS
O60506	sp|O60506|HNRPQ_HUMAN	sp|O60506|HNRPQ_HUMAN	2	1	1	sp|O60506|HNRPQ_HUMAN Heterogeneous nuclear ribonucleoprotein Q OS=Homo sapiens OX=9606 GN=SYNCRIP PE=1 SV=2	Heterogeneous nuclear ribonucleoprotein Q	SYNCRIP	Homo sapiens	1	2	1	1	2	2	2	1	1	1	1	1	1	1	1	1	1	1	1	1	1	1	4	2022-01-02	2022-01-02	69.602	623	623	2022-05-03	1	1	1	1	1	1	0.0023256	76.399	By matching	By MS/MS	By MS/MS
O43390	sp|O43390|HNRPR_HUMAN	sp|O43390|HNRPR_HUMAN	2	2	1	sp|O43390|HNRPR_HUMAN Heterogeneous nuclear ribonucleoprotein R OS=Homo sapiens OX=9606 GN=HNRNPR PE=1 SV=1	Heterogeneous nuclear ribonucleoprotein R	HNRNPR	Homo sapiens	1	2	2	1	1	2	2	1	1	1	1	2	2	1	1	1	0	1	1	1	1	1	2022-09-03	2022-09-03	2022-01-02	70.942	633	633	2025-03-01	1	2	2	1	1	1	0	14.536	By MS/MS	By MS/MS	By MS/MS
Q00839	sp|Q00839|HNRPU_HUMAN	sp|Q00839|HNRPU_HUMAN	5	5	5	sp|Q00839|HNRPU_HUMAN Heterogeneous nuclear ribonucleoprotein U OS=Homo sapiens OX=9606 GN=HNRNPU PE=1 SV=6	Heterogeneous nuclear ribonucleoprotein U	HNRNPU	Homo sapiens	1	5	5	5	5	5	5	5	5	5	5	5	5	5	5	5	5	5	5	5	5	5	2022-05-08	2022-05-08	2022-05-08	90.583	825	825	2022-05-03	5	5	5	5	5	5	0	68.292	By MS/MS	By MS/MS	By MS/MS
P22626	sp|P22626|ROA2_HUMAN	sp|P22626|ROA2_HUMAN	7	7	7	sp|P22626|ROA2_HUMAN Heterogeneous nuclear ribonucleoproteins A2/B1 OS=Homo sapiens OX=9606 GN=HNRNPA2B1 PE=1 SV=2	Heterogeneous nuclear ribonucleoproteins A2/B1	HNRNPA2B1	Homo sapiens	1	7	7	7	6	6	6	7	7	7	6	6	6	7	7	7	6	6	6	7	7	7	2022-06-24	2022-06-24	2022-06-24	37.429	353	353	1966-03-01	6	6	6	8	8	7	0	207.49	By MS/MS	By MS/MS	By MS/MS
P07910	sp|P07910|HNRPC_HUMAN	sp|P07910|HNRPC_HUMAN	2	2	2	sp|P07910|HNRPC_HUMAN Heterogeneous nuclear ribonucleoproteins C1/C2 OS=Homo sapiens OX=9606 GN=HNRNPC PE=1 SV=4	Heterogeneous nuclear ribonucleoproteins C1/C2	HNRNPC	Homo sapiens	1	2	2	2	1	1	1	1	0	0	1	1	1	1	0	0	1	1	1	1	0	0	2022-05-09	2022-05-09	2022-05-09	33.67	306	306	2022-05-02	1	1	1	1			0.0025543	10.902	By MS/MS	By MS/MS	By MS/MS
Q2TB90	sp|Q2TB90|HKDC1_HUMAN	sp|Q2TB90|HKDC1_HUMAN	1	1	1	sp|Q2TB90|HKDC1_HUMAN Hexokinase HKDC1 OS=Homo sapiens OX=9606 GN=HKDC1 PE=1 SV=3	Hexokinase HKDC1	HKDC1	Homo sapiens	1	1	1	1	1	1	1	1	1	1	1	1	1	1	1	1	1	1	1	1	1	1	2022-02-02	2022-02-02	2022-02-02	102.54	917	917	2022-05-03	1	1	1	1	1	1	0.0024631	87.686	By MS/MS	By MS/MS	By MS/MS
P19367	sp|P19367|HXK1_HUMAN;sp|Q1W674|HXK2_PIG	sp|P19367|HXK1_HUMAN	9;1	9;1	9;1	sp|P19367|HXK1_HUMAN Hexokinase-1 OS=Homo sapiens OX=9606 GN=HK1 PE=1 SV=3	Hexokinase-1	HK1	Homo sapiens	2	9	9	9	9	9	9	9	8	9	9	9	9	9	8	9	9	9	9	9	8	9	2022-02-13	2022-02-13	2022-02-13	102.48	917	917;917	1949-03-01	10	10	10	12	9	10	0	122.19	By MS/MS	By MS/MS	By MS/MS
P09429	sp|P09429|HMGB1_HUMAN;sp|P12682|HMGB1_PIG;sp|B2RPK0|HGB1A_HUMAN	sp|P09429|HMGB1_HUMAN;sp|P12682|HMGB1_PIG	6;5;2	6;5;2	6;5;2	sp|P09429|HMGB1_HUMAN High mobility group protein B1 OS=Homo sapiens OX=9606 GN=HMGB1 PE=1 SV=3;sp|P12682|HMGB1_PIG High mobility group protein B1 OS=Sus scrofa OX=9823 GN=HMGB1 PE=2 SV=3	High mobility group protein B1	HMGB1	Homo sapiens	3	6	6	6	6	6	6	6	6	5	6	6	6	6	6	5	6	6	6	6	6	5	2022-03-29	2022-03-29	2022-03-29	24.893	215	215;215;211	1944-03-01	9	9	10	9	9	8	0	54.82	By MS/MS	By MS/MS	By MS/MS
P26583	sp|P26583|HMGB2_HUMAN;sp|P17741|HMGB2_PIG	sp|P26583|HMGB2_HUMAN;sp|P17741|HMGB2_PIG	2;2	2;2	2;2	sp|P26583|HMGB2_HUMAN High mobility group protein B2 OS=Homo sapiens OX=9606 GN=HMGB2 PE=1 SV=2;sp|P17741|HMGB2_PIG High mobility group protein B2 OS=Sus scrofa OX=9823 GN=HMGB2 PE=1 SV=2	High mobility group protein B2	HMGB2	Homo sapiens	2	2	2	2	2	2	2	2	1	1	2	2	2	2	1	1	2	2	2	2	1	1	2022-05-11	2022-05-11	2022-05-11	24.033	209	209;210	2022-01-03	2	2	2	2	1	1	0	12.816	By MS/MS	By MS/MS	By MS/MS
P49773	sp|P49773|HINT1_HUMAN	sp|P49773|HINT1_HUMAN	2	2	2	sp|P49773|HINT1_HUMAN Histidine triad nucleotide-binding protein 1 OS=Homo sapiens OX=9606 GN=HINT1 PE=1 SV=2	Histidine triad nucleotide-binding protein 1	HINT1	Homo sapiens	1	2	2	2	2	2	2	2	2	2	2	2	2	2	2	2	2	2	2	2	2	2	2022-02-26	2022-02-26	2022-02-26	13.802	126	126	2022-05-03	3	3	3	3	3	3	0	13.879	By MS/MS	By MS/MS	By MS/MS
Q9BX68	sp|Q9BX68|HINT2_HUMAN	sp|Q9BX68|HINT2_HUMAN	1	1	1	sp|Q9BX68|HINT2_HUMAN Histidine triad nucleotide-binding protein 2, mitochondrial OS=Homo sapiens OX=9606 GN=HINT2 PE=1 SV=1	Histidine triad nucleotide-binding protein 2, mitochondrial	HINT2	Homo sapiens	1	1	1	1	1	1	1	1	1	1	1	1	1	1	1	1	1	1	1	1	1	1	2022-03-12	2022-03-12	2022-03-12	17.162	163	163	2022-05-03	2	2	2	2	2	2	0.0024038	81.497	By MS/MS	By MS/MS	By MS/MS
P07305	sp|P07305|H10_HUMAN	sp|P07305|H10_HUMAN	1	1	1	sp|P07305|H10_HUMAN Histone H1.0 OS=Homo sapiens OX=9606 GN=H1-0 PE=1 SV=3	Histone H1.0	H1-0	Homo sapiens	1	1	1	1	1	1	1	0	1	1	1	1	1	0	1	1	1	1	1	0	1	1	2022-07-06	2022-07-06	2022-07-06	20.863	194	194	2022-04-03	1	1	1		1	1	0.0025349	10.681	By MS/MS	By MS/MS	By MS/MS
Q92522	sp|Q92522|H1X_HUMAN	sp|Q92522|H1X_HUMAN	2	2	2	sp|Q92522|H1X_HUMAN Histone H1.10 OS=Homo sapiens OX=9606 GN=H1-10 PE=1 SV=1	Histone H1.10	H1-10	Homo sapiens	1	2	2	2	2	2	2	2	2	2	2	2	2	2	2	2	2	2	2	2	2	2	2022-03-10	2022-03-10	2022-03-10	22.487	213	213	2022-05-03	2	2	2	2	2	2	0	20.104	By MS/MS	By MS/MS	By MS/MS
P16403	sp|P16403|H12_HUMAN;sp|P10412|H14_HUMAN;sp|P16402|H13_HUMAN;sp|P22492|H1T_HUMAN;sp|P06348|H1T_PIG;sp|Q02539|H11_HUMAN	sp|P16403|H12_HUMAN;sp|P10412|H14_HUMAN;sp|P16402|H13_HUMAN;sp|P22492|H1T_HUMAN;sp|P06348|H1T_PIG;sp|Q02539|H11_HUMAN	2;2;2;1;1;1	2;2;2;1;1;1	2;2;2;1;1;1	sp|P16403|H12_HUMAN Histone H1.2 OS=Homo sapiens OX=9606 GN=H1-2 PE=1 SV=2;sp|P10412|H14_HUMAN Histone H1.4 OS=Homo sapiens OX=9606 GN=H1-4 PE=1 SV=2;sp|P16402|H13_HUMAN Histone H1.3 OS=Homo sapiens OX=9606 GN=H1-3 PE=1 SV=2;sp|P22492|H1T_HUMAN Histone H1t	Histone H1.2	H1-2	Homo sapiens	6	2	2	2	2	2	2	2	2	2	2	2	2	2	2	2	2	2	2	2	2	2	2022-08-10	2022-08-10	2022-08-10	21.364	213	213;219;221;207;211;215	1965-03-01	2	3	3	3	3	3	0	15.011	By MS/MS	By MS/MS	By MS/MS
Q99878	sp|Q99878|H2A1J_HUMAN;sp|Q96KK5|H2A1H_HUMAN;sp|Q9BTM1|H2AJ_HUMAN;sp|Q16777|H2A2C_HUMAN;sp|Q93077|H2A1C_HUMAN;sp|Q7L7L0|H2A3_HUMAN;sp|Q6FI13|H2A2A_HUMAN;sp|P20671|H2A1D_HUMAN;sp|P0C0S8|H2A1_HUMAN;sp|P04908|H2A1B_HUMAN	sp|Q99878|H2A1J_HUMAN;sp|Q96KK5|H2A1H_HUMAN;sp|Q9BTM1|H2AJ_HUMAN;sp|Q16777|H2A2C_HUMAN;sp|Q93077|H2A1C_HUMAN;sp|Q7L7L0|H2A3_HUMAN;sp|Q6FI13|H2A2A_HUMAN;sp|P20671|H2A1D_HUMAN;sp|P0C0S8|H2A1_HUMAN;sp|P04908|H2A1B_HUMAN	1;1;1;1;1;1;1;1;1;1	1;1;1;1;1;1;1;1;1;1	1;1;1;1;1;1;1;1;1;1	sp|Q99878|H2A1J_HUMAN Histone H2A type 1-J OS=Homo sapiens OX=9606 GN=H2AC14 PE=1 SV=3;sp|Q96KK5|H2A1H_HUMAN Histone H2A type 1-H OS=Homo sapiens OX=9606 GN=H2AC12 PE=1 SV=3;sp|Q9BTM1|H2AJ_HUMAN Histone H2A.J OS=Homo sapiens OX=9606 GN=H2AJ PE=1 SV=1;sp|Q1	Histone H2A type 1-J	H2AC14	Homo sapiens	10	1	1	1	1	1	1	1	1	1	1	1	1	1	1	1	1	1	1	1	1	1	2022-08-14	2022-08-14	2022-08-14	13.936	128	128;128;129;129;130;130;130;130;130;130	2022-05-03	2	2	2	2	2	2	0	36.87	By MS/MS	By MS/MS	By MS/MS
Q99880	sp|Q99880|H2B1L_HUMAN;sp|Q99879|H2B1M_HUMAN;sp|Q99877|H2B1N_HUMAN;sp|Q93079|H2B1H_HUMAN;sp|Q8N257|H2B3B_HUMAN;sp|Q5QNW6|H2B2F_HUMAN;sp|Q16778|H2B2E_HUMAN;sp|P62807|H2B1C_HUMAN;sp|P58876|H2B1D_HUMAN;sp|P57053|H2BFS_HUMAN;sp|P33778|H2B1B_HUMAN;sp|P23527|H2B1O_HUMAN;sp|P06899|H2B1J_HUMAN;sp|O60814|H2B1K_HUMAN;sp|Q96A08|H2B1A_HUMAN	sp|Q99880|H2B1L_HUMAN;sp|Q99879|H2B1M_HUMAN;sp|Q99877|H2B1N_HUMAN;sp|Q93079|H2B1H_HUMAN;sp|Q8N257|H2B3B_HUMAN;sp|Q5QNW6|H2B2F_HUMAN;sp|Q16778|H2B2E_HUMAN;sp|P62807|H2B1C_HUMAN;sp|P58876|H2B1D_HUMAN;sp|P57053|H2BFS_HUMAN;sp|P33778|H2B1B_HUMAN;sp|P23527|H2B1O_HUMAN;sp|P06899|H2B1J_HUMAN;sp|O60814|H2B1K_HUMAN;sp|Q96A08|H2B1A_HUMAN	2;2;2;2;2;2;2;2;2;2;2;2;2;2;1	2;2;2;2;2;2;2;2;2;2;2;2;2;2;1	2;2;2;2;2;2;2;2;2;2;2;2;2;2;1	sp|Q99880|H2B1L_HUMAN Histone H2B type 1-L OS=Homo sapiens OX=9606 GN=H2BC13 PE=1 SV=3;sp|Q99879|H2B1M_HUMAN Histone H2B type 1-M OS=Homo sapiens OX=9606 GN=H2BC14 PE=1 SV=3;sp|Q99877|H2B1N_HUMAN Histone H2B type 1-N OS=Homo sapiens OX=9606 GN=H2BC15 PE=1	Histone H2B type 1-L	HIST1H2BL	Homo sapiens	15	2	2	2	1	1	2	2	2	2	1	1	2	2	2	2	1	1	2	2	2	2	2022-06-20	2022-06-20	2022-06-20	13.952	126	126;126;126;126;126;126;126;126;126;126;126;126;126;126;127	2022-09-03	1	1	2	2	2	2	0	78.415	By MS/MS	By MS/MS	By MS/MS
Q71LE2	sp|Q71LE2|H33_PIG;sp|P84243|H33_HUMAN	sp|Q71LE2|H33_PIG;sp|P84243|H33_HUMAN	1;1	1;1	1;1	sp|Q71LE2|H33_PIG Histone H3.3 OS=Sus scrofa OX=9823 GN=H3-3A PE=2 SV=3;sp|P84243|H33_HUMAN Histone H3.3 OS=Homo sapiens OX=9606 GN=H3-3A PE=1 SV=2	Histone H3.3	H3-3A	Sus scrofa	2	1	1	1	0	0	0	0	0	1	0	0	0	0	0	1	0	0	0	0	0	1	2022-05-23	2022-05-23	2022-05-23	15.328	136	136;136	6						1	0.0043431	68.025
P62805	sp|P62805|H4_HUMAN;sp|P62802|H4_PIG	sp|P62805|H4_HUMAN;sp|P62802|H4_PIG	2;2	2;2	2;2	sp|P62805|H4_HUMAN Histone H4 OS=Homo sapiens OX=9606 GN=H4C1 PE=1 SV=2;sp|P62802|H4_PIG Histone H4 OS=Sus scrofa OX=9823 PE=1 SV=2	Histone H4	H4C1	Homo sapiens	2	2	2	2	2	2	2	2	2	2	2	2	2	2	2	2	2	2	2	2	2	2	2022-04-21	2022-04-21	2022-04-21	11.367	103	103;103	2022-05-03	2	2	2	2	2	2	0	50.009	By MS/MS	By MS/MS	By MS/MS
Q09028	sp|Q09028|RBBP4_HUMAN	sp|Q09028|RBBP4_HUMAN	5	5	5	sp|Q09028|RBBP4_HUMAN Histone-binding protein RBBP4 OS=Homo sapiens OX=9606 GN=RBBP4 PE=1 SV=3	Histone-binding protein RBBP4	RBBP4	Homo sapiens	1	5	5	5	4	5	3	3	3	3	4	5	3	3	3	3	4	5	3	3	3	3	2022-04-29	2022-04-29	2022-04-29	47.655	425	425	2024-03-01	4	5	3	3	3	3	0	45.196	By MS/MS	By MS/MS	By MS/MS
P50502	sp|P50502|F10A1_HUMAN;sp|Q8NFI4|F10A5_HUMAN;sp|Q8IZP2|ST134_HUMAN	sp|P50502|F10A1_HUMAN;sp|Q8NFI4|F10A5_HUMAN;sp|Q8IZP2|ST134_HUMAN	4;3;2	4;3;2	4;3;2	sp|P50502|F10A1_HUMAN Hsc70-interacting protein OS=Homo sapiens OX=9606 GN=ST13 PE=1 SV=2;sp|Q8NFI4|F10A5_HUMAN Putative protein FAM10A5 OS=Homo sapiens OX=9606 GN=ST13P5 PE=5 SV=1;sp|Q8IZP2|ST134_HUMAN Putative protein FAM10A4 OS=Homo sapiens OX=9606 GN=S	Hsc70-interacting protein	ST13	Homo sapiens	3	4	4	4	4	4	4	4	4	3	4	4	4	4	4	3	4	4	4	4	4	3	2022-06-14	2022-06-14	2022-06-14	41.331	369	369;369;240	1948-03-01	5	5	5	6	6	4	0	47.029	By MS/MS	By MS/MS	By MS/MS
Q16543	sp|Q16543|CDC37_HUMAN	sp|Q16543|CDC37_HUMAN	2	2	2	sp|Q16543|CDC37_HUMAN Hsp90 co-chaperone Cdc37 OS=Homo sapiens OX=9606 GN=CDC37 PE=1 SV=1	Hsp90 co-chaperone Cdc37	CDC37	Homo sapiens	1	2	2	2	2	2	1	2	2	2	2	2	1	2	2	2	2	2	1	2	2	2	2022-03-09	2022-03-09	2022-03-09	44.468	378	378	1955-03-01	2	2	1	2	2	2	0	13.633	By MS/MS	By MS/MS	By MS/MS
Q45FY6	sp|Q45FY6|HPRT_PIG;sp|P00492|HPRT_HUMAN	sp|Q45FY6|HPRT_PIG;sp|P00492|HPRT_HUMAN	7;4	7;4	7;4	sp|Q45FY6|HPRT_PIG Hypoxanthine-guanine phosphoribosyltransferase OS=Sus scrofa OX=9823 GN=HPRT1 PE=2 SV=3;sp|P00492|HPRT_HUMAN Hypoxanthine-guanine phosphoribosyltransferase OS=Homo sapiens OX=9606 GN=HPRT1 PE=1 SV=2	Hypoxanthine-guanine phosphoribosyltransferase	HPRT1	Sus scrofa	2	7	7	7	7	7	7	7	7	7	7	7	7	7	7	7	7	7	7	7	7	7	47.7	47.7	47.7	24.555	218	218;218	2022-05-03	8	8	8	8	8	8	0	80.304	By MS/MS	By MS/MS	By MS/MS
Q9Y4L1	sp|Q9Y4L1|HYOU1_HUMAN	sp|Q9Y4L1|HYOU1_HUMAN	4	4	4	sp|Q9Y4L1|HYOU1_HUMAN Hypoxia up-regulated protein 1 OS=Homo sapiens OX=9606 GN=HYOU1 PE=1 SV=1	Hypoxia up-regulated protein 1	HYOU1	Homo sapiens	1	4	4	4	4	4	3	3	4	4	4	4	3	3	4	4	4	4	3	3	4	4	2022-01-06	2022-01-06	2022-01-06	111.33	999	999	1961-03-01	4	4	3	3	4	5	0	25.42	By MS/MS	By MS/MS	By MS/MS
Q9Y5U9	sp|Q9Y5U9|IR3IP_HUMAN	sp|Q9Y5U9|IR3IP_HUMAN	1	1	1	sp|Q9Y5U9|IR3IP_HUMAN Immediate early response 3-interacting protein 1 OS=Homo sapiens OX=9606 GN=IER3IP1 PE=1 SV=1	Immediate early response 3-interacting protein 1	IER3IP1	Homo sapiens	1	1	1	1	1	1	1	1	1	0	1	1	1	1	1	0	1	1	1	1	1	0	2022-04-24	2022-04-24	2022-04-24	89.687	82	82	3	1	1	1	1	1		0.0023725	79.009	By matching	By matching	By matching
Q8TDY8	sp|Q8TDY8|IGDC4_HUMAN	sp|Q8TDY8|IGDC4_HUMAN	2	2	2	sp|Q8TDY8|IGDC4_HUMAN Immunoglobulin superfamily DCC subclass member 4 OS=Homo sapiens OX=9606 GN=IGDCC4 PE=1 SV=1	Immunoglobulin superfamily DCC subclass member 4	IGDCC4	Homo sapiens	1	2	2	2	1	1	1	1	2	1	1	1	1	1	2	1	1	1	1	1	2	1	2	2	2	134.21	1250	1250	1971-03-01	1	1	1	1	2	1	0.0025478	10.874	By MS/MS	By MS/MS	By MS/MS
Q14974	sp|Q14974|IMB1_HUMAN	sp|Q14974|IMB1_HUMAN	8	8	8	sp|Q14974|IMB1_HUMAN Importin subunit beta-1 OS=Homo sapiens OX=9606 GN=KPNB1 PE=1 SV=2	Importin subunit beta-1	KPNB1	Homo sapiens	1	8	8	8	7	8	7	7	8	6	7	8	7	7	8	6	7	8	7	7	8	6	2022-05-14	2022-05-14	2022-05-14	97.169	876	876	1944-03-01	7	8	7	7	8	6	0	53.334	By MS/MS	By MS/MS	By MS/MS
O95373	sp|O95373|IPO7_HUMAN	sp|O95373|IPO7_HUMAN	5	5	5	sp|O95373|IPO7_HUMAN Importin-7 OS=Homo sapiens OX=9606 GN=IPO7 PE=1 SV=1	Importin-7	IPO7	Homo sapiens	1	5	5	5	4	4	5	4	3	3	4	4	5	4	3	3	4	4	5	4	3	3	2022-08-06	2022-08-06	2022-08-06	119.52	1038	1038	2022-03-03	4	4	5	4	3	3	0	35.864	By MS/MS	By MS/MS	By MS/MS
Q15181	sp|Q15181|IPYR_HUMAN	sp|Q15181|IPYR_HUMAN	7	7	7	sp|Q15181|IPYR_HUMAN Inorganic pyrophosphatase OS=Homo sapiens OX=9606 GN=PPA1 PE=1 SV=2	Inorganic pyrophosphatase	PPA1	Homo sapiens	1	7	7	7	7	6	7	6	5	5	7	6	7	6	5	5	7	6	7	6	5	5	2022-01-29	2022-01-29	2022-01-29	32.66	289	289	1941-03-01	11	10	11	10	10	9	0	277.91	By MS/MS	By MS/MS	By MS/MS
P20839	sp|P20839|IMDH1_HUMAN	sp|P20839|IMDH1_HUMAN	8	8	8	sp|P20839|IMDH1_HUMAN Inosine-5-monophosphate dehydrogenase 1 OS=Homo sapiens OX=9606 GN=IMPDH1 PE=1 SV=2	Inosine-5-monophosphate dehydrogenase 1	IMPDH1	Homo sapiens	1	8	8	8	8	7	8	7	7	7	8	7	8	7	7	7	8	7	8	7	7	7	21	21	21	55.405	514	514	1943-03-01	11	11	13	9	11	10	0	70.179	By MS/MS	By MS/MS	By MS/MS
P12268	sp|P12268|IMDH2_HUMAN	sp|P12268|IMDH2_HUMAN	2	2	2	sp|P12268|IMDH2_HUMAN Inosine-5-monophosphate dehydrogenase 2 OS=Homo sapiens OX=9606 GN=IMPDH2 PE=1 SV=2	Inosine-5-monophosphate dehydrogenase 2	IMPDH2	Homo sapiens	1	2	2	2	1	1	2	2	2	2	1	1	2	2	2	2	1	1	2	2	2	2	6	6	6	55.804	514	514	2022-09-03	1	1	2	2	2	2	0	12.714	By MS/MS	By MS/MS	By MS/MS
O77591	sp|O77591|IMPA1_PIG	sp|O77591|IMPA1_PIG	2	2	2	sp|O77591|IMPA1_PIG Inositol monophosphatase 1 OS=Sus scrofa OX=9823 GN=IMPA1 PE=2 SV=1	Inositol monophosphatase 1	IMPA1	Sus scrofa	1	2	2	2	1	1	2	1	2	2	1	1	2	1	2	2	1	1	2	1	2	2	2022-01-10	2022-01-10	2022-01-10	30.132	277	277	1989-03-01	1	1	2	1	2	2	0	2016-12-01	By matching	By MS/MS	By MS/MS
Q764M6	sp|Q764M6|IRF3_PIG	sp|Q764M6|IRF3_PIG	1	1	1	sp|Q764M6|IRF3_PIG Interferon regulatory factor 3 OS=Sus scrofa OX=9823 GN=IRF3 PE=1 SV=1	Interferon regulatory factor 3	IRF3	Sus scrofa	1	1	1	1	0	1	1	0	0	0	0	1	1	0	0	0	0	1	1	0	0	0	2022-01-04	2022-01-04	2022-01-04	46.645	419	419	2022-05-02		1	1				0.0023753	79.328		By MS/MS	By matching
O75569	sp|O75569|PRKRA_HUMAN	sp|O75569|PRKRA_HUMAN	1	1	1	sp|O75569|PRKRA_HUMAN Interferon-inducible double-stranded RNA-dependent protein kinase activator A OS=Homo sapiens OX=9606 GN=PRKRA PE=1 SV=1	Interferon-inducible double-stranded RNA-dependent protein kinase activator A	PRKRA	Homo sapiens	1	1	1	1	0	0	1	0	1	1	0	0	1	0	1	1	0	0	1	0	1	1	2022-08-04	2022-08-04	2022-08-04	34.404	313	313	1967-04-01			1		1	1	0.0074231	65.936			By MS/MS
Q12905	sp|Q12905|ILF2_HUMAN	sp|Q12905|ILF2_HUMAN	3	3	3	sp|Q12905|ILF2_HUMAN Interleukin enhancer-binding factor 2 OS=Homo sapiens OX=9606 GN=ILF2 PE=1 SV=2	Interleukin enhancer-binding factor 2	ILF2	Homo sapiens	1	3	3	3	3	3	3	3	3	3	3	3	3	3	3	3	3	3	3	3	3	3	2022-08-11	2022-08-11	2022-08-11	43.062	390	390	2022-05-03	4	4	4	4	4	4	0	24.148	By MS/MS	By MS/MS	By MS/MS
Q12906	sp|Q12906|ILF3_HUMAN	sp|Q12906|ILF3_HUMAN	2	2	2	sp|Q12906|ILF3_HUMAN Interleukin enhancer-binding factor 3 OS=Homo sapiens OX=9606 GN=ILF3 PE=1 SV=3	Interleukin enhancer-binding factor 3	ILF3	Homo sapiens	1	2	2	2	2	2	2	2	2	2	2	2	2	2	2	2	2	2	2	2	2	2	2022-02-03	2022-02-03	2022-02-03	95.337	894	894	2022-05-03	2	2	2	2	2	2	0	14.038	By MS/MS	By MS/MS	By MS/MS
Q17R60	sp|Q17R60|IMPG1_HUMAN	sp|Q17R60|IMPG1_HUMAN	1	1	1	sp|Q17R60|IMPG1_HUMAN Interphotoreceptor matrix proteoglycan 1 OS=Homo sapiens OX=9606 GN=IMPG1 PE=1 SV=2	Interphotoreceptor matrix proteoglycan 1	IMPG1	Homo sapiens	1	1	1	1	1	1	1	1	1	1	1	1	1	1	1	1	1	1	1	1	1	1	2022-04-01	2022-04-01	2022-04-01	89.386	797	797	2022-05-03	1	1	1	1	1	1	0.0025	96.173	By MS/MS	By MS/MS	By MS/MS
Q9BZV3	sp|Q9BZV3|IMPG2_HUMAN	sp|Q9BZV3|IMPG2_HUMAN	1	1	1	sp|Q9BZV3|IMPG2_HUMAN Interphotoreceptor matrix proteoglycan 2 OS=Homo sapiens OX=9606 GN=IMPG2 PE=1 SV=3	Interphotoreceptor matrix proteoglycan 2	IMPG2	Homo sapiens	1	1	1	1	1	1	1	1	1	1	1	1	1	1	1	1	1	1	1	1	1	1	0.9	0.9	0.9	138.62	1241	1241	2022-05-03	1	1	1	1	1	1	0.0034014	7.312	By MS/MS	By MS/MS	By MS/MS
Q86U28	sp|Q86U28|ISCA2_HUMAN	sp|Q86U28|ISCA2_HUMAN	2	2	2	sp|Q86U28|ISCA2_HUMAN Iron-sulfur cluster assembly 2 homolog, mitochondrial OS=Homo sapiens OX=9606 GN=ISCA2 PE=1 SV=2	Iron-sulfur cluster assembly 2 homolog, mitochondrial	ISCA2	Homo sapiens	1	2	2	2	2	2	2	2	2	2	2	2	2	2	2	2	2	2	2	2	2	2	2022-06-15	2022-06-15	2022-06-15	16.476	154	154	2022-05-03	2	2	2	2	2	2	0.0013038	11.383	By MS/MS	By MS/MS	By MS/MS
Q7L266	sp|Q7L266|ASGL1_HUMAN	sp|Q7L266|ASGL1_HUMAN	1	1	1	sp|Q7L266|ASGL1_HUMAN Isoaspartyl peptidase/L-asparaginase OS=Homo sapiens OX=9606 GN=ASRGL1 PE=1 SV=2	Isoaspartyl peptidase/L-asparaginase	ASRGL1	Homo sapiens	1	1	1	1	1	1	1	1	1	1	1	1	1	1	1	1	1	1	1	1	1	1	2022-09-04	2022-09-04	2022-09-04	32.054	308	308	2022-05-03	1	1	1	1	1	1	0.002551	10.878	By MS/MS	By matching	By MS/MS
P50213	sp|P50213|IDH3A_HUMAN;sp|P56471|IDH3A_PIG	sp|P50213|IDH3A_HUMAN	7;1	7;1	7;1	sp|P50213|IDH3A_HUMAN Isocitrate dehydrogenase [NAD] subunit alpha, mitochondrial OS=Homo sapiens OX=9606 GN=IDH3A PE=1 SV=1	Isocitrate dehydrogenase [NAD] subunit alpha, mitochondrial	IDH3A	Homo sapiens	2	7	7	7	6	6	7	6	5	5	6	6	7	6	5	5	6	6	7	6	5	5	2022-03-24	2022-03-24	2022-03-24	39.591	366	366;90	1935-03-01	8	8	9	8	7	6	0	110.11	By MS/MS	By MS/MS	By MS/MS
O43837	sp|O43837|IDH3B_HUMAN;sp|P56472|IDH3B_PIG	sp|O43837|IDH3B_HUMAN	3;1	3;1	3;1	sp|O43837|IDH3B_HUMAN Isocitrate dehydrogenase [NAD] subunit beta, mitochondrial OS=Homo sapiens OX=9606 GN=IDH3B PE=1 SV=2	Isocitrate dehydrogenase [NAD] subunit beta, mitochondrial	IDH3B	Homo sapiens	2	3	3	3	3	3	3	3	3	3	3	3	3	3	3	3	3	3	3	3	3	3	2022-04-10	2022-04-10	2022-04-10	42.183	385	385;103	2022-05-03	3	3	3	3	3	3	0	59.814	By MS/MS	By MS/MS	By MS/MS
P51553	sp|P51553|IDH3G_HUMAN	sp|P51553|IDH3G_HUMAN	4	4	3	sp|P51553|IDH3G_HUMAN Isocitrate dehydrogenase [NAD] subunit gamma, mitochondrial OS=Homo sapiens OX=9606 GN=IDH3G PE=1 SV=1	Isocitrate dehydrogenase [NAD] subunit gamma, mitochondrial	IDH3G	Homo sapiens	1	4	4	3	4	4	3	3	2	2	4	4	3	3	2	2	3	3	3	3	2	2	2022-01-20	2022-01-20	2022-08-16	42.794	393	393	2022-06-03	4	4	3	3	2	2	0	36.332	By MS/MS	By MS/MS	By MS/MS
P41566	sp|P41566|IDH3G_PIG	sp|P41566|IDH3G_PIG	2	1	1	sp|P41566|IDH3G_PIG Isocitrate dehydrogenase [NAD] subunit gamma, mitochondrial (Fragments) OS=Sus scrofa OX=9823 GN=IDH3G PE=1 SV=1	Isocitrate dehydrogenase [NAD] subunit gamma, mitochondrial (Fragments)	IDH3G	Sus scrofa	1	2	1	1	2	2	1	1	1	1	1	1	1	1	1	1	1	1	1	1	1	1	2022-06-22	2022-04-10	2022-04-10	10.777	106	106	2022-05-03	1	1	1	1	1	1	0.0043011	67.292	By MS/MS	By MS/MS	By MS/MS
O75874	sp|O75874|IDHC_HUMAN	sp|O75874|IDHC_HUMAN	2	2	2	sp|O75874|IDHC_HUMAN Isocitrate dehydrogenase [NADP] cytoplasmic OS=Homo sapiens OX=9606 GN=IDH1 PE=1 SV=2	Isocitrate dehydrogenase [NADP] cytoplasmic	IDH1	Homo sapiens	1	2	2	2	2	2	2	2	2	2	2	2	2	2	2	2	2	2	2	2	2	2	6	6	6	46.659	414	414	2022-05-03	2	2	2	2	2	2	0	15.253	By MS/MS	By MS/MS	By MS/MS
P33198	sp|P33198|IDHP_PIG;sp|P48735|IDHP_HUMAN	sp|P33198|IDHP_PIG;sp|P48735|IDHP_HUMAN	9;7	9;7	9;7	sp|P33198|IDHP_PIG Isocitrate dehydrogenase [NADP], mitochondrial (Fragment) OS=Sus scrofa OX=9823 GN=IDH2 PE=1 SV=1;sp|P48735|IDHP_HUMAN Isocitrate dehydrogenase [NADP], mitochondrial OS=Homo sapiens OX=9606 GN=IDH2 PE=1 SV=2	Isocitrate dehydrogenase [NADP], mitochondrial (Fragment)	IDH2	Sus scrofa	2	9	9	9	8	9	9	7	7	7	8	9	9	7	7	7	8	9	9	7	7	7	2022-08-26	2022-08-26	2022-08-26	47.526	421	421;452	1935-03-01	8	9	10	7	7	7	0	75.891	By MS/MS	By MS/MS	By MS/MS
Q9NSE4	sp|Q9NSE4|SYIM_HUMAN	sp|Q9NSE4|SYIM_HUMAN	1	1	1	sp|Q9NSE4|SYIM_HUMAN Isoleucine--tRNA ligase, mitochondrial OS=Homo sapiens OX=9606 GN=IARS2 PE=1 SV=2	Isoleucine--tRNA ligase, mitochondrial	IARS2	Homo sapiens	1	1	1	1	1	1	1	1	1	1	1	1	1	1	1	1	1	1	1	1	1	1	2022-07-01	2022-07-01	2022-07-01	113.79	1012	1012	2022-05-03	1	1	1	1	1	1	0.004386	68.675	By MS/MS	By MS/MS	By MS/MS
P26440	sp|P26440|IVD_HUMAN	sp|P26440|IVD_HUMAN	2	2	2	sp|P26440|IVD_HUMAN Isovaleryl-CoA dehydrogenase, mitochondrial OS=Homo sapiens OX=9606 GN=IVD PE=1 SV=2	Isovaleryl-CoA dehydrogenase, mitochondrial	IVD	Homo sapiens	1	2	2	2	2	2	2	2	2	2	2	2	2	2	2	2	2	2	2	2	2	2	2022-09-05	2022-09-05	2022-09-05	46.65	426	426	2022-05-03	2	2	2	2	2	2	0	13.752	By MS/MS	By matching	By MS/MS
Q9UK76	sp|Q9UK76|JUPI1_HUMAN	sp|Q9UK76|JUPI1_HUMAN	1	1	1	sp|Q9UK76|JUPI1_HUMAN Jupiter microtubule associated homolog 1 OS=Homo sapiens OX=9606 GN=JPT1 PE=1 SV=3	Jupiter microtubule associated homolog 1	JPT1	Homo sapiens	1	1	1	1	1	1	1	1	1	1	1	1	1	1	1	1	1	1	1	1	1	1	2022-06-15	2022-06-15	2022-06-15	16.014	154	154	2022-05-03	1	1	1	1	1	1	0.002451	85.771	By MS/MS	By matching	By matching
Q07666	sp|Q07666|KHDR1_HUMAN	sp|Q07666|KHDR1_HUMAN	1	1	1	sp|Q07666|KHDR1_HUMAN KH domain-containing, RNA-binding, signal transduction-associated protein 1 OS=Homo sapiens OX=9606 GN=KHDRBS1 PE=1 SV=1	KH domain-containing, RNA-binding, signal transduction-associated protein 1	KHDRBS1	Homo sapiens	1	1	1	1	1	1	1	1	1	1	1	1	1	1	1	1	1	1	1	1	1	1	2022-02-03	2022-02-03	2022-02-03	48.227	443	443	2022-03-03	2	2	2	1	1	2	0.0023202	76.172	By MS/MS	By MS/MS	By MS/MS
Q86UP2	sp|Q86UP2|KTN1_HUMAN	sp|Q86UP2|KTN1_HUMAN	2	2	2	sp|Q86UP2|KTN1_HUMAN Kinectin OS=Homo sapiens OX=9606 GN=KTN1 PE=1 SV=1	Kinectin	KTN1	Homo sapiens	1	2	2	2	2	2	2	2	2	2	2	2	2	2	2	2	2	2	2	2	2	2	2022-08-01	2022-08-01	2022-08-01	156.27	1357	1357	2022-05-03	2	2	2	2	2	2	0	11.734	By MS/MS	By MS/MS	By MS/MS
P33176	sp|P33176|KINH_HUMAN;sp|O60282|KIF5C_HUMAN;sp|Q12840|KIF5A_HUMAN	sp|P33176|KINH_HUMAN	5;1;1	5;1;1	5;1;1	sp|P33176|KINH_HUMAN Kinesin-1 heavy chain OS=Homo sapiens OX=9606 GN=KIF5B PE=1 SV=1	Kinesin-1 heavy chain	KIF5B	Homo sapiens	3	5	5	5	4	5	5	4	4	3	4	5	5	4	4	3	4	5	5	4	4	3	2022-03-07	2022-03-07	2022-03-07	109.68	963	963;957;1032	1932-03-01	4	5	5	4	4	3	0	33.508	By MS/MS	By MS/MS	By MS/MS
Q04760	sp|Q04760|LGUL_HUMAN	sp|Q04760|LGUL_HUMAN	3	3	3	sp|Q04760|LGUL_HUMAN Lactoylglutathione lyase OS=Homo sapiens OX=9606 GN=GLO1 PE=1 SV=4	Lactoylglutathione lyase	GLO1	Homo sapiens	1	3	3	3	3	3	3	3	3	3	3	3	3	3	3	3	3	3	3	3	3	3	13	13	13	20.777	184	184	2022-05-03	4	4	4	4	4	4	0	20.803	By MS/MS	By MS/MS	By MS/MS
P42167	sp|P42167|LAP2B_HUMAN;sp|P42166|LAP2A_HUMAN	sp|P42167|LAP2B_HUMAN;sp|P42166|LAP2A_HUMAN	3;3	3;3	3;3	sp|P42167|LAP2B_HUMAN Lamina-associated polypeptide 2, isoforms beta/gamma OS=Homo sapiens OX=9606 GN=TMPO PE=1 SV=2;sp|P42166|LAP2A_HUMAN Lamina-associated polypeptide 2, isoform alpha OS=Homo sapiens OX=9606 GN=TMPO PE=1 SV=2	Lamina-associated polypeptide 2, isoforms beta/gamma	TMPO	Homo sapiens	2	3	3	3	3	3	3	3	3	3	3	3	3	3	3	3	3	3	3	3	3	3	2022-01-12	2022-01-12	2022-01-12	50.67	454	454;694	2022-03-03	4	4	3	3	3	3	0	25.88	By MS/MS	By MS/MS	By MS/MS
P20700	sp|P20700|LMNB1_HUMAN	sp|P20700|LMNB1_HUMAN	5	5	5	sp|P20700|LMNB1_HUMAN Lamin-B1 OS=Homo sapiens OX=9606 GN=LMNB1 PE=1 SV=2	Lamin-B1	LMNB1	Homo sapiens	1	5	5	5	5	5	4	5	5	5	5	5	4	5	5	5	5	5	4	5	5	5	2022-08-10	2022-08-10	2022-08-10	66.408	586	586	1953-03-01	5	5	4	6	5	5	0	35.854	By MS/MS	By MS/MS	By MS/MS
Q9NS86	sp|Q9NS86|LANC2_HUMAN	sp|Q9NS86|LANC2_HUMAN	1	1	1	sp|Q9NS86|LANC2_HUMAN LanC-like protein 2 OS=Homo sapiens OX=9606 GN=LANCL2 PE=1 SV=1	LanC-like protein 2	LANCL2	Homo sapiens	1	1	1	1	1	1	1	1	1	1	1	1	1	1	1	1	1	1	1	1	1	1	2022-01-03	2022-01-03	2022-01-03	50.854	450	450	2022-05-03	1	1	1	1	1	1	0	13.478	By MS/MS	By MS/MS	By MS/MS
A5D9M6	sp|A5D9M6|BAG6_PIG	sp|A5D9M6|BAG6_PIG	1	1	1	sp|A5D9M6|BAG6_PIG Large proline-rich protein BAG6 OS=Sus scrofa OX=9823 GN=BAG6 PE=1 SV=1	Large proline-rich protein BAG6	BAG6	Sus scrofa	1	1	1	1	0	0	1	1	0	0	0	0	1	1	0	0	0	0	1	1	0	0	2022-07-02	2022-07-02	2022-07-02	118.63	1128	1128	2022-05-03			1	1			0.0023669	78.706			By matching
Q14847	sp|Q14847|LASP1_HUMAN	sp|Q14847|LASP1_HUMAN	2	2	2	sp|Q14847|LASP1_HUMAN LIM and SH3 domain protein 1 OS=Homo sapiens OX=9606 GN=LASP1 PE=1 SV=2	LIM and SH3 domain protein 1	LASP1	Homo sapiens	1	2	2	2	2	2	2	2	2	2	2	2	2	2	2	2	2	2	2	2	2	2	2022-08-08	2022-08-08	2022-08-08	29.717	261	261	2022-05-03	2	2	2	2	2	2	0	13.655	By MS/MS	By MS/MS	By MS/MS
Q13449	sp|Q13449|LSAMP_HUMAN	sp|Q13449|LSAMP_HUMAN	2	2	2	sp|Q13449|LSAMP_HUMAN Limbic system-associated membrane protein OS=Homo sapiens OX=9606 GN=LSAMP PE=1 SV=2	Limbic system-associated membrane protein	LSAMP	Homo sapiens	1	2	2	2	2	2	2	1	2	2	2	2	2	1	2	2	2	2	2	1	2	2	2022-04-10	2022-04-10	2022-04-10	37.393	338	338	1945-03-01	2	2	2	1	2	2	0	12.166	By MS/MS	By MS/MS	By MS/MS
P00339	sp|P00339|LDHA_PIG;sp|P00338|LDHA_HUMAN;sp|Q9TSX5|LDHC_PIG;sp|Q6ZMR3|LDH6A_HUMAN;sp|P07864|LDHC_HUMAN	sp|P00339|LDHA_PIG	13;3;1;1;1	12;2;0;0;0	12;2;0;0;0	sp|P00339|LDHA_PIG L-lactate dehydrogenase A chain OS=Sus scrofa OX=9823 GN=LDHA PE=1 SV=3	L-lactate dehydrogenase A chain	LDHA	Sus scrofa	5	13	12	12	12	12	13	11	12	12	11	11	12	10	11	11	11	11	12	10	11	11	52.1	48.5	48.5	36.618	332	332;332;332;332;332	1946-03-01	16	16	17	15	16	15	0	207.83	By MS/MS	By MS/MS	By MS/MS
P00336	sp|P00336|LDHB_PIG;sp|P07195|LDHB_HUMAN	sp|P00336|LDHB_PIG;sp|P07195|LDHB_HUMAN	13;10	13;10	12;9	sp|P00336|LDHB_PIG L-lactate dehydrogenase B chain OS=Sus scrofa OX=9823 GN=LDHB PE=1 SV=3;sp|P07195|LDHB_HUMAN L-lactate dehydrogenase B chain OS=Homo sapiens OX=9606 GN=LDHB PE=1 SV=2	L-lactate dehydrogenase B chain	LDHB	Sus scrofa	2	13	13	12	13	13	13	13	13	13	13	13	13	13	13	13	12	12	12	12	12	12	46.1	46.1	42.5	36.612	334	334;334	1956-03-01	25	27	26	28	28	28	0	323.31	By MS/MS	By MS/MS	By MS/MS
P79274	sp|P79274|ACADL_PIG;sp|P28330|ACADL_HUMAN	sp|P79274|ACADL_PIG;sp|P28330|ACADL_HUMAN	2;1	2;1	2;1	sp|P79274|ACADL_PIG Long-chain specific acyl-CoA dehydrogenase, mitochondrial OS=Sus scrofa OX=9823 GN=ACADL PE=2 SV=1;sp|P28330|ACADL_HUMAN Long-chain specific acyl-CoA dehydrogenase, mitochondrial OS=Homo sapiens OX=9606 GN=ACADL PE=1 SV=2	Long-chain specific acyl-CoA dehydrogenase, mitochondrial	ACADL	Sus scrofa	2	2	2	2	2	2	1	0	1	0	2	2	1	0	1	0	2	2	1	0	1	0	2022-08-05	2022-08-05	2022-08-05	47.956	430	430;430	1933-02-01	2	2	1		1		0.0013106	11.453	By MS/MS	By MS/MS	By MS/MS
Q9UKU0	sp|Q9UKU0|ACSL6_HUMAN	sp|Q9UKU0|ACSL6_HUMAN	1	1	1	sp|Q9UKU0|ACSL6_HUMAN Long-chain-fatty-acid--CoA ligase 6 OS=Homo sapiens OX=9606 GN=ACSL6 PE=1 SV=4	Long-chain-fatty-acid--CoA ligase 6	ACSL6	Homo sapiens	1	1	1	1	1	1	1	1	1	1	1	1	1	1	1	1	1	1	1	1	1	1	2022-07-01	2022-07-01	2022-07-01	77.751	697	697	2022-05-03	1	1	1	1	1	1	0.0043956	6.903	By MS/MS	By MS/MS	By MS/MS
P81693	sp|P81693|PPAC_PIG;sp|P24666|PPAC_HUMAN	sp|P81693|PPAC_PIG;sp|P24666|PPAC_HUMAN	2;2	2;2	2;2	sp|P81693|PPAC_PIG Low molecular weight phosphotyrosine protein phosphatase OS=Sus scrofa OX=9823 GN=ACP1 PE=1 SV=2;sp|P24666|PPAC_HUMAN Low molecular weight phosphotyrosine protein phosphatase OS=Homo sapiens OX=9606 GN=ACP1 PE=1 SV=3	Low molecular weight phosphotyrosine protein phosphatase	ACP1	Sus scrofa	2	2	2	2	2	2	2	2	1	1	2	2	2	2	1	1	2	2	2	2	1	1	2022-07-12	2022-07-12	2022-07-12	18.035	158	158;158	2027-03-01	2	2	2	2	2	1	0	2026-12-01	By MS/MS	By MS/MS	By MS/MS
Q14696	sp|Q14696|MESD_HUMAN	sp|Q14696|MESD_HUMAN	1	1	1	sp|Q14696|MESD_HUMAN LRP chaperone MESD OS=Homo sapiens OX=9606 GN=MESD PE=1 SV=2	LRP chaperone MESD	MESD	Homo sapiens	1	1	1	1	1	1	1	1	1	1	1	1	1	1	1	1	1	1	1	1	1	1	2022-06-05	2022-06-05	2022-06-05	26.076	234	234	2022-05-03	1	1	1	1	1	1	0.0033632	71.674	By matching	By matching	By matching
O95232	sp|O95232|LC7L3_HUMAN	sp|O95232|LC7L3_HUMAN	2	2	2	sp|O95232|LC7L3_HUMAN Luc7-like protein 3 OS=Homo sapiens OX=9606 GN=LUC7L3 PE=1 SV=2	Luc7-like protein 3	LUC7L3	Homo sapiens	1	2	2	2	1	2	2	2	2	2	1	2	2	2	2	2	1	2	2	2	2	2	2022-09-07	2022-09-07	2022-09-07	51.466	432	432	1973-03-01	1	2	2	2	2	2	0	17.66	By MS/MS	By MS/MS	By MS/MS
Q8MIZ3	sp|Q8MIZ3|DCPS_PIG;sp|Q96C86|DCPS_HUMAN	sp|Q8MIZ3|DCPS_PIG	4;1	4;1	4;1	sp|Q8MIZ3|DCPS_PIG m7GpppX diphosphatase OS=Sus scrofa OX=9823 GN=DCPS PE=2 SV=1	m7GpppX diphosphatase	DCPS	Sus scrofa	2	4	4	4	3	4	4	4	4	4	3	4	4	4	4	4	3	4	4	4	4	4	2022-04-21	2022-04-21	2022-04-21	38.58	337	337;337	1952-03-01	3	5	5	4	4	4	0	31.619	By MS/MS	By MS/MS	By MS/MS
P11708	sp|P11708|MDHC_PIG;sp|P40925|MDHC_HUMAN	sp|P11708|MDHC_PIG	10;3	10;3	10;3	sp|P11708|MDHC_PIG Malate dehydrogenase, cytoplasmic OS=Sus scrofa OX=9823 GN=MDH1 PE=1 SV=4	Malate dehydrogenase, cytoplasmic	MDH1	Sus scrofa	2	10	10	10	9	10	10	10	10	10	9	10	10	10	10	10	9	10	10	10	10	10	37.4	37.4	37.4	36.454	334	334;334	1961-03-01	11	12	13	17	15	12	0	323.31	By MS/MS	By MS/MS	By MS/MS
P00346	sp|P00346|MDHM_PIG;sp|P40926|MDHM_HUMAN	sp|P00346|MDHM_PIG;sp|P40926|MDHM_HUMAN	13;9	13;9	13;9	sp|P00346|MDHM_PIG Malate dehydrogenase, mitochondrial OS=Sus scrofa OX=9823 GN=MDH2 PE=1 SV=2;sp|P40926|MDHM_HUMAN Malate dehydrogenase, mitochondrial OS=Homo sapiens OX=9606 GN=MDH2 PE=1 SV=3	Malate dehydrogenase, mitochondrial	MDH2	Sus scrofa	2	13	13	13	13	13	13	13	13	13	13	13	13	13	13	13	13	13	13	13	13	13	52.1	52.1	52.1	35.484	338	338;338	1944-03-01	18	19	19	17	17	17	0	323.31	By MS/MS	By MS/MS	By MS/MS
P43243	sp|P43243|MATR3_HUMAN	sp|P43243|MATR3_HUMAN	8	8	8	sp|P43243|MATR3_HUMAN Matrin-3 OS=Homo sapiens OX=9606 GN=MATR3 PE=1 SV=2	Matrin-3	MATR3	Homo sapiens	1	8	8	8	6	7	7	8	8	8	6	7	7	8	8	8	6	7	7	8	8	8	2022-08-14	2022-08-14	2022-08-14	94.622	847	847	1964-03-01	6	7	8	8	8	8	0	58.517	By MS/MS	By MS/MS	By MS/MS
P0DN78	sp|P0DN78|OPSG3_HUMAN;sp|P0DN77|OPSG2_HUMAN;sp|P04001|OPSG_HUMAN;sp|P04000|OPSR_HUMAN	sp|P0DN78|OPSG3_HUMAN;sp|P0DN77|OPSG2_HUMAN;sp|P04001|OPSG_HUMAN;sp|P04000|OPSR_HUMAN	1;1;1;1	1;1;1;1	1;1;1;1	sp|P0DN78|OPSG3_HUMAN Medium-wave-sensitive opsin 3 OS=Homo sapiens OX=9606 GN=OPN1MW3 PE=3 SV=1;sp|P0DN77|OPSG2_HUMAN Medium-wave-sensitive opsin 2 OS=Homo sapiens OX=9606 GN=OPN1MW2 PE=3 SV=1;sp|P04001|OPSG_HUMAN Medium-wave-sensitive opsin 1 OS=Homo sap	Medium-wave-sensitive opsin 3	OPN1MW3	Homo sapiens	4	1	1	1	1	1	1	1	1	1	1	1	1	1	1	1	1	1	1	1	1	1	2022-05-02	2022-05-02	2022-05-02	40.584	364	364;364;364;364	2022-05-03	2	2	2	2	2	2	0	12.615	By MS/MS	By MS/MS	By MS/MS
Q95250	sp|Q95250|PGRC1_PIG;sp|O00264|PGRC1_HUMAN	sp|Q95250|PGRC1_PIG;sp|O00264|PGRC1_HUMAN	4;2	4;2	4;2	sp|Q95250|PGRC1_PIG Membrane-associated progesterone receptor component 1 OS=Sus scrofa OX=9823 GN=PGRMC1 PE=1 SV=3;sp|O00264|PGRC1_HUMAN Membrane-associated progesterone receptor component 1 OS=Homo sapiens OX=9606 GN=PGRMC1 PE=1 SV=3	Membrane-associated progesterone receptor component 1	PGRMC1	Sus scrofa	2	4	4	4	4	4	4	4	4	4	4	4	4	4	4	4	4	4	4	4	4	4	43.3	43.3	43.3	21.609	194	194;195	1933-03-01	6	4	4	5	4	4	0	48.137	By MS/MS	By MS/MS	By MS/MS
P55145	sp|P55145|MANF_HUMAN	sp|P55145|MANF_HUMAN	2	2	2	sp|P55145|MANF_HUMAN Mesencephalic astrocyte-derived neurotrophic factor OS=Homo sapiens OX=9606 GN=MANF PE=1 SV=3	Mesencephalic astrocyte-derived neurotrophic factor	MANF	Homo sapiens	1	2	2	2	2	2	2	1	1	1	2	2	2	1	1	1	2	2	2	1	1	1	2022-02-13	2022-02-13	2022-02-13	2022-07-20	182	182	3	2	2	3	1	1	1	0	11.744	By MS/MS	By MS/MS	By MS/MS
Q13228	sp|Q13228|SBP1_HUMAN	sp|Q13228|SBP1_HUMAN	4	4	4	sp|Q13228|SBP1_HUMAN Methanethiol oxidase OS=Homo sapiens OX=9606 GN=SELENBP1 PE=1 SV=2	Methanethiol oxidase	SELENBP1	Homo sapiens	1	4	4	4	2	3	3	4	4	3	2	3	3	4	4	3	2	3	3	4	4	3	2022-03-12	2022-03-12	2022-03-12	52.39	472	472	1965-03-01	2	4	3	4	4	3	0	36.96	By MS/MS	By MS/MS	By MS/MS
P56192	sp|P56192|SYMC_HUMAN	sp|P56192|SYMC_HUMAN	1	1	1	sp|P56192|SYMC_HUMAN Methionine--tRNA ligase, cytoplasmic OS=Homo sapiens OX=9606 GN=MARS1 PE=1 SV=2	Methionine--tRNA ligase, cytoplasmic	MARS1	Homo sapiens	1	1	1	1	0	0	0	0	1	1	0	0	0	0	1	1	0	0	0	0	1	1	2022-07-01	2022-07-01	2022-07-01	101.11	900	900	2022-05-05					1	1	0.004315	67.512
P51608	sp|P51608|MECP2_HUMAN	sp|P51608|MECP2_HUMAN	2	2	2	sp|P51608|MECP2_HUMAN Methyl-CpG-binding protein 2 OS=Homo sapiens OX=9606 GN=MECP2 PE=1 SV=1	Methyl-CpG-binding protein 2	MECP2	Homo sapiens	1	2	2	2	1	1	1	1	1	2	1	1	1	1	1	2	1	1	1	1	1	2	2022-03-05	2022-03-05	2022-03-05	52.44	486	486	1986-03-01	1	1	1	1	1	2	0.0025381	10.706	By MS/MS	By MS/MS	By MS/MS
P79382	sp|P79382|MGST1_PIG	sp|P79382|MGST1_PIG	1	1	1	sp|P79382|MGST1_PIG Microsomal glutathione S-transferase 1 OS=Sus scrofa OX=9823 GN=MGST1 PE=2 SV=3	Microsomal glutathione S-transferase 1	MGST1	Sus scrofa	1	1	1	1	1	1	1	1	1	1	1	1	1	1	1	1	1	1	1	1	1	1	2022-04-08	2022-04-08	2022-04-08	17.65	155	155	2022-05-03	1	1	1	1	1	1	0.0043103	67.487	By MS/MS	By matching	By matching
P78559	sp|P78559|MAP1A_HUMAN	sp|P78559|MAP1A_HUMAN	2	2	2	sp|P78559|MAP1A_HUMAN Microtubule-associated protein 1A OS=Homo sapiens OX=9606 GN=MAP1A PE=1 SV=6	Microtubule-associated protein 1A	MAP1A	Homo sapiens	1	2	2	2	2	2	2	2	2	2	2	2	2	2	2	2	2	2	2	2	2	2	2022-06-01	2022-06-01	2022-06-01	305.48	2803	2803	2022-05-03	2	2	2	2	2	2	0.0013072	11.398	By MS/MS	By MS/MS	By MS/MS
P46821	sp|P46821|MAP1B_HUMAN	sp|P46821|MAP1B_HUMAN	20	20	20	sp|P46821|MAP1B_HUMAN Microtubule-associated protein 1B OS=Homo sapiens OX=9606 GN=MAP1B PE=1 SV=2	Microtubule-associated protein 1B	MAP1B	Homo sapiens	1	20	20	20	19	18	17	17	17	16	19	18	17	17	17	16	19	18	17	17	17	16	2022-01-14	2022-01-14	2022-01-14	270.63	2468	2468	1941-03-01	19	18	17	17	17	16	0	323.31	By MS/MS	By MS/MS	By MS/MS
P11137	sp|P11137|MTAP2_HUMAN	sp|P11137|MTAP2_HUMAN	7	7	7	sp|P11137|MTAP2_HUMAN Microtubule-associated protein 2 OS=Homo sapiens OX=9606 GN=MAP2 PE=1 SV=4	Microtubule-associated protein 2	MAP2	Homo sapiens	1	7	7	7	6	6	6	6	7	7	6	6	6	6	7	7	6	6	6	6	7	7	2022-03-07	2022-03-07	2022-03-07	199.52	1827	1827	1972-03-01	7	7	7	7	9	10	0	62.786	By MS/MS	By MS/MS	By MS/MS
P27816	sp|P27816|MAP4_HUMAN	sp|P27816|MAP4_HUMAN	1	1	1	sp|P27816|MAP4_HUMAN Microtubule-associated protein 4 OS=Homo sapiens OX=9606 GN=MAP4 PE=1 SV=3	Microtubule-associated protein 4	MAP4	Homo sapiens	1	1	1	1	1	1	1	0	1	1	1	1	1	0	1	1	1	1	1	0	1	1	2022-05-01	2022-05-01	2022-05-01	121	1152	1152	2022-04-03	1	1	1		1	1	0.0023697	78.734	By MS/MS	By MS/MS	By MS/MS
Q15691	sp|Q15691|MARE1_HUMAN	sp|Q15691|MARE1_HUMAN	2	2	2	sp|Q15691|MARE1_HUMAN Microtubule-associated protein RP/EB family member 1 OS=Homo sapiens OX=9606 GN=MAPRE1 PE=1 SV=3	Microtubule-associated protein RP/EB family member 1	MAPRE1	Homo sapiens	1	2	2	2	1	1	1	1	1	2	1	1	1	1	1	2	1	1	1	1	1	2	2022-09-11	2022-09-11	2022-09-11	29.999	268	268	1986-03-01	1	1	1	1	1	2	0	12.136	By matching	By matching	By MS/MS
Q15555	sp|Q15555|MARE2_HUMAN	sp|Q15555|MARE2_HUMAN	2	1	1	sp|Q15555|MARE2_HUMAN Microtubule-associated protein RP/EB family member 2 OS=Homo sapiens OX=9606 GN=MAPRE2 PE=1 SV=1	Microtubule-associated protein RP/EB family member 2	MAPRE2	Homo sapiens	1	2	1	1	2	2	2	2	2	2	1	1	1	1	1	1	1	1	1	1	1	1	2022-09-08	2022-08-05	2022-08-05	37.031	327	327	2022-05-03	1	1	1	1	1	1	0.0043478	68.027	By MS/MS	By MS/MS	By MS/MS
Q9UPY8	sp|Q9UPY8|MARE3_HUMAN	sp|Q9UPY8|MARE3_HUMAN	4	4	3	sp|Q9UPY8|MARE3_HUMAN Microtubule-associated protein RP/EB family member 3 OS=Homo sapiens OX=9606 GN=MAPRE3 PE=1 SV=1	Microtubule-associated protein RP/EB family member 3	MAPRE3	Homo sapiens	1	4	4	3	4	4	4	3	3	3	4	4	4	3	3	3	3	3	3	2	2	2	2022-07-21	2022-07-21	2022-01-18	31.982	281	281	1943-03-01	4	4	4	4	3	4	0	76.594	By MS/MS	By MS/MS	By MS/MS
P10636	sp|P10636|TAU_HUMAN	sp|P10636|TAU_HUMAN	4	4	4	sp|P10636|TAU_HUMAN Microtubule-associated protein tau OS=Homo sapiens OX=9606 GN=MAPT PE=1 SV=5	Microtubule-associated protein tau	MAPT	Homo sapiens	1	4	4	4	2	2	3	3	3	3	2	2	3	3	3	3	2	2	3	3	3	3	2022-09-06	2022-09-06	2022-09-06	78.927	758	758	1975-03-01	2	2	3	3	3	3	0	24.979	By MS/MS	By MS/MS	By MS/MS
Q9Y3D6	sp|Q9Y3D6|FIS1_HUMAN	sp|Q9Y3D6|FIS1_HUMAN	1	1	1	sp|Q9Y3D6|FIS1_HUMAN Mitochondrial fission 1 protein OS=Homo sapiens OX=9606 GN=FIS1 PE=1 SV=2	Mitochondrial fission 1 protein	FIS1	Homo sapiens	1	1	1	1	1	1	1	1	1	1	1	1	1	1	1	1	1	1	1	1	1	1	2022-06-08	2022-06-08	2022-06-08	16.937	152	152	2022-05-03	1	1	1	1	1	1	0	26.205	By MS/MS	By MS/MS	By matching
O60220	sp|O60220|TIM8A_HUMAN	sp|O60220|TIM8A_HUMAN	2	2	2	sp|O60220|TIM8A_HUMAN Mitochondrial import inner membrane translocase subunit Tim8 A OS=Homo sapiens OX=9606 GN=TIMM8A PE=1 SV=1	Mitochondrial import inner membrane translocase subunit Tim8 A	TIMM8A	Homo sapiens	1	2	2	2	2	2	2	2	2	2	2	2	2	2	2	2	2	2	2	2	2	2	2022-07-22	2022-07-22	2022-07-22	10.998	97	97	2022-05-03	2	2	2	2	2	2	0	11.877	By MS/MS	By MS/MS	By MS/MS
O94826	sp|O94826|TOM70_HUMAN	sp|O94826|TOM70_HUMAN	4	4	4	sp|O94826|TOM70_HUMAN Mitochondrial import receptor subunit TOM70 OS=Homo sapiens OX=9606 GN=TOMM70 PE=1 SV=1	Mitochondrial import receptor subunit TOM70	TOMM70	Homo sapiens	1	4	4	4	3	4	4	3	2	2	3	4	4	3	2	2	3	4	4	3	2	2	2022-09-10	2022-09-10	2022-09-10	67.454	608	608	2017-03-01	3	4	4	3	2	2	0	33.765	By MS/MS	By MS/MS	By MS/MS
P28482	sp|P28482|MK01_HUMAN	sp|P28482|MK01_HUMAN	5	5	5	sp|P28482|MK01_HUMAN Mitogen-activated protein kinase 1 OS=Homo sapiens OX=9606 GN=MAPK1 PE=1 SV=3	Mitogen-activated protein kinase 1	MAPK1	Homo sapiens	1	5	5	5	5	5	4	4	4	4	5	5	4	4	4	4	5	5	4	4	4	4	2022-01-26	2022-01-26	2022-01-26	41.389	360	360	1944-03-01	5	5	4	4	4	5	0	39.358	By MS/MS	By MS/MS	By MS/MS
P27361	sp|P27361|MK03_HUMAN	sp|P27361|MK03_HUMAN	2	2	2	sp|P27361|MK03_HUMAN Mitogen-activated protein kinase 3 OS=Homo sapiens OX=9606 GN=MAPK3 PE=1 SV=4	Mitogen-activated protein kinase 3	MAPK3	Homo sapiens	1	2	2	2	1	2	1	1	1	1	1	2	1	1	1	1	1	2	1	1	1	1	2022-01-07	2022-01-07	2022-01-07	43.135	379	379	2022-08-03	1	2	1	2	2	2	0	11.811	By MS/MS	By MS/MS	By MS/MS
O43684	sp|O43684|BUB3_HUMAN	sp|O43684|BUB3_HUMAN	3	3	3	sp|O43684|BUB3_HUMAN Mitotic checkpoint protein BUB3 OS=Homo sapiens OX=9606 GN=BUB3 PE=1 SV=1	Mitotic checkpoint protein BUB3	BUB3	Homo sapiens	1	3	3	3	2	3	3	2	2	2	2	3	3	2	2	2	2	3	3	2	2	2	2022-08-16	2022-08-16	2022-08-16	37.154	328	328	2022-02-03	3	3	3	2	2	2	0	19.294	By MS/MS	By MS/MS	By MS/MS
P26042	sp|P26042|MOES_PIG;sp|P26038|MOES_HUMAN;sp|P35241|RADI_HUMAN;sp|P26044|RADI_PIG;sp|P15311|EZRI_HUMAN	sp|P26042|MOES_PIG;sp|P26038|MOES_HUMAN;sp|P35241|RADI_HUMAN;sp|P26044|RADI_PIG;sp|P15311|EZRI_HUMAN	1;1;1;1;1	1;1;1;1;1	1;1;1;1;1	sp|P26042|MOES_PIG Moesin OS=Sus scrofa OX=9823 GN=MSN PE=2 SV=3;sp|P26038|MOES_HUMAN Moesin OS=Homo sapiens OX=9606 GN=MSN PE=1 SV=3;sp|P35241|RADI_HUMAN Radixin OS=Homo sapiens OX=9606 GN=RDX PE=1 SV=1;sp|P26044|RADI_PIG Radixin OS=Sus scrofa OX=9823 GN=	Moesin	MSN	Sus scrofa	5	1	1	1	1	1	1	1	1	1	1	1	1	1	1	1	1	1	1	1	1	1	2022-07-01	2022-07-01	2022-07-01	67.66	577	577;577;583;583;586	2022-05-03	1	1	1	1	1	1	0	11.983	By MS/MS	By MS/MS	By matching
Q9BV23	sp|Q9BV23|ABHD6_HUMAN	sp|Q9BV23|ABHD6_HUMAN	2	2	2	sp|Q9BV23|ABHD6_HUMAN Monoacylglycerol lipase ABHD6 OS=Homo sapiens OX=9606 GN=ABHD6 PE=1 SV=1	Monoacylglycerol lipase ABHD6	ABHD6	Homo sapiens	1	2	2	2	2	2	2	2	1	2	2	2	2	2	1	2	2	2	2	2	1	2	2022-07-07	2022-07-07	2022-07-07	38.33	337	337	1936-03-01	2	2	2	2	1	2	0	12.839	By MS/MS	By MS/MS	By MS/MS
Q7Z5P9	sp|Q7Z5P9|MUC19_HUMAN	sp|Q7Z5P9|MUC19_HUMAN	2	2	2	sp|Q7Z5P9|MUC19_HUMAN Mucin-19 OS=Homo sapiens OX=9606 GN=MUC19 PE=1 SV=3	Mucin-19	MUC19	Homo sapiens	1	2	2	2	2	2	2	2	2	2	2	2	2	2	2	2	2	2	2	2	2	2	0.5	0.5	0.5	805.24	8384	8384	1975-03-01	2	2	3	3	3	3	0	11.741	By MS/MS	By MS/MS	By MS/MS
O00499	sp|O00499|BIN1_HUMAN	sp|O00499|BIN1_HUMAN	3	3	3	sp|O00499|BIN1_HUMAN Myc box-dependent-interacting protein 1 OS=Homo sapiens OX=9606 GN=BIN1 PE=1 SV=1	Myc box-dependent-interacting protein 1	BIN1	Homo sapiens	1	3	3	3	3	3	2	1	1	1	3	3	2	1	1	1	3	3	2	1	1	1	2022-01-09	2022-01-09	2022-01-09	64.699	593	593	1973-02-01	3	3	2	1	1	1	0	18.669	By MS/MS	By MS/MS	By matching
P60660	sp|P60660|MYL6_HUMAN;sp|P60662|MYL6_PIG;sp|P14649|MYL6B_HUMAN	sp|P60660|MYL6_HUMAN;sp|P60662|MYL6_PIG	4;4;1	4;4;1	4;4;1	sp|P60660|MYL6_HUMAN Myosin light polypeptide 6 OS=Homo sapiens OX=9606 GN=MYL6 PE=1 SV=2;sp|P60662|MYL6_PIG Myosin light polypeptide 6 OS=Sus scrofa OX=9823 GN=MYL6 PE=1 SV=2	Myosin light polypeptide 6	MYL6	Homo sapiens	3	4	4	4	4	4	4	4	4	4	4	4	4	4	4	4	4	4	4	4	4	4	2022-01-31	2022-01-31	2022-01-31	16.93	151	151;151;208	2022-05-03	4	4	4	4	4	4	0	28.687	By MS/MS	By MS/MS	By MS/MS
P19105	sp|P19105|ML12A_HUMAN;sp|O14950|ML12B_HUMAN;sp|P29269|MYL9_PIG;sp|P24844|MYL9_HUMAN	sp|P19105|ML12A_HUMAN;sp|O14950|ML12B_HUMAN;sp|P29269|MYL9_PIG;sp|P24844|MYL9_HUMAN	4;4;3;3	4;4;3;3	4;4;3;3	sp|P19105|ML12A_HUMAN Myosin regulatory light chain 12A OS=Homo sapiens OX=9606 GN=MYL12A PE=1 SV=2;sp|O14950|ML12B_HUMAN Myosin regulatory light chain 12B OS=Homo sapiens OX=9606 GN=MYL12B PE=1 SV=2;sp|P29269|MYL9_PIG Myosin regulatory light polypeptide 9	Myosin regulatory light chain 12A	MYL12A	Homo sapiens	4	4	4	4	4	4	4	4	3	3	4	4	4	4	3	3	4	4	4	4	3	3	33.9	33.9	33.9	19.794	171	171;172;172;172	1932-03-01	4	4	4	4	3	3	0	35.277	By MS/MS	By MS/MS	By MS/MS
P35580	sp|P35580|MYH10_HUMAN	sp|P35580|MYH10_HUMAN	14	14	9	sp|P35580|MYH10_HUMAN Myosin-10 OS=Homo sapiens OX=9606 GN=MYH10 PE=1 SV=3	Myosin-10	MYH10	Homo sapiens	1	14	14	9	11	12	13	12	12	12	11	12	13	12	12	12	7	8	8	7	7	7	2022-09-09	2022-09-09	2022-02-06	229	1976	1976	1953-03-01	11	12	13	12	12	12	0	165.8	By MS/MS	By MS/MS	By MS/MS
P35579	sp|P35579|MYH9_HUMAN;sp|P35749|MYH11_HUMAN	sp|P35579|MYH9_HUMAN	10;4	5;1	5;1	sp|P35579|MYH9_HUMAN Myosin-9 OS=Homo sapiens OX=9606 GN=MYH9 PE=1 SV=4	Myosin-9	MYH9	Homo sapiens	2	10	5	5	9	9	10	9	10	10	5	5	5	4	5	5	5	5	5	4	5	5	2022-05-07	2022-08-03	2022-08-03	226.53	1960	1960;1972	1948-03-01	5	5	5	4	5	5	0	34.142	By MS/MS	By MS/MS	By MS/MS
P58546	sp|P58546|MTPN_HUMAN	sp|P58546|MTPN_HUMAN	2	2	2	sp|P58546|MTPN_HUMAN Myotrophin OS=Homo sapiens OX=9606 GN=MTPN PE=1 SV=2	Myotrophin	MTPN	Homo sapiens	1	2	2	2	2	2	2	2	2	1	2	2	2	2	2	1	2	2	2	2	2	1	2022-05-30	2022-05-30	2022-05-30	12.895	118	118	2027-03-01	2	2	2	2	2	1	0	155.78	By MS/MS	By MS/MS	By MS/MS
P29966	sp|P29966|MARCS_HUMAN	sp|P29966|MARCS_HUMAN	2	2	2	sp|P29966|MARCS_HUMAN Myristoylated alanine-rich C-kinase substrate OS=Homo sapiens OX=9606 GN=MARCKS PE=1 SV=4	Myristoylated alanine-rich C-kinase substrate	MARCKS	Homo sapiens	1	2	2	2	2	2	2	2	2	2	2	2	2	2	2	2	2	2	2	2	2	2	2022-02-14	2022-02-14	2022-02-14	31.554	332	332	1956-03-01	2	2	5	4	3	2	0	66.129	By MS/MS	By MS/MS	By MS/MS
O94760	sp|O94760|DDAH1_HUMAN	sp|O94760|DDAH1_HUMAN	2	2	2	sp|O94760|DDAH1_HUMAN N(G),N(G)-dimethylarginine dimethylaminohydrolase 1 OS=Homo sapiens OX=9606 GN=DDAH1 PE=1 SV=3	N(G),N(G)-dimethylarginine dimethylaminohydrolase 1	DDAH1	Homo sapiens	1	2	2	2	2	2	2	1	1	1	2	2	2	1	1	1	2	2	2	1	1	1	7	7	7	31.121	285	285	2022-09-02	2	3	2	1	1	1	0	12.049	By MS/MS	By MS/MS	By MS/MS
O95865	sp|O95865|DDAH2_HUMAN	sp|O95865|DDAH2_HUMAN	4	4	4	sp|O95865|DDAH2_HUMAN N(G),N(G)-dimethylarginine dimethylaminohydrolase 2 OS=Homo sapiens OX=9606 GN=DDAH2 PE=1 SV=1	N(G),N(G)-dimethylarginine dimethylaminohydrolase 2	DDAH2	Homo sapiens	1	4	4	4	3	4	4	4	4	3	3	4	4	4	4	3	3	4	4	4	4	3	2022-05-22	2022-05-22	2022-05-22	29.644	285	285	2022-05-03	3	4	4	4	4	3	0	60.358	By MS/MS	By MS/MS	By MS/MS
Q9C000	sp|Q9C000|NLRP1_HUMAN	sp|Q9C000|NLRP1_HUMAN	1	1	1	sp|Q9C000|NLRP1_HUMAN NACHT, LRR and PYD domains-containing protein 1 OS=Homo sapiens OX=9606 GN=NLRP1 PE=1 SV=1	NACHT, LRR and PYD domains-containing protein 1	NLRP1	Homo sapiens	1	1	1	1	1	1	1	1	1	1	1	1	1	1	1	1	1	1	1	1	1	1	0.4	0.4	0.4	165.86	1473	1473	2022-05-03	1	1	1	1	1	1	0.0024907	93.982	By MS/MS	By matching	By MS/MS
Q0PIT9	sp|Q0PIT9|NNRE_PIG;sp|Q8NCW5|NNRE_HUMAN	sp|Q0PIT9|NNRE_PIG;sp|Q8NCW5|NNRE_HUMAN	3;2	3;2	3;2	sp|Q0PIT9|NNRE_PIG NAD(P)H-hydrate epimerase OS=Sus scrofa OX=9823 GN=NAXE PE=2 SV=1;sp|Q8NCW5|NNRE_HUMAN NAD(P)H-hydrate epimerase OS=Homo sapiens OX=9606 GN=NAXE PE=1 SV=2	NAD(P)H-hydrate epimerase	NAXE	Sus scrofa	2	3	3	3	3	3	3	3	2	2	3	3	3	3	2	2	3	3	3	3	2	2	2022-08-19	2022-08-19	2022-08-19	31.501	288	288;288	1932-03-01	4	4	4	4	3	3	0	52.681	By MS/MS	By MS/MS	By MS/MS
P49821	sp|P49821|NDUV1_HUMAN	sp|P49821|NDUV1_HUMAN	7	7	7	sp|P49821|NDUV1_HUMAN NADH dehydrogenase [ubiquinone] flavoprotein 1, mitochondrial OS=Homo sapiens OX=9606 GN=NDUFV1 PE=1 SV=4	NADH dehydrogenase [ubiquinone] flavoprotein 1, mitochondrial	NDUFV1	Homo sapiens	1	7	7	7	4	5	4	6	5	6	4	5	4	6	5	6	4	5	4	6	5	6	2022-05-26	2022-05-26	2022-05-26	50.817	464	464	2022-07-03	4	5	4	6	5	6	0	59.179	By MS/MS	By MS/MS	By MS/MS
P19404	sp|P19404|NDUV2_HUMAN	sp|P19404|NDUV2_HUMAN	2	2	2	sp|P19404|NDUV2_HUMAN NADH dehydrogenase [ubiquinone] flavoprotein 2, mitochondrial OS=Homo sapiens OX=9606 GN=NDUFV2 PE=1 SV=2	NADH dehydrogenase [ubiquinone] flavoprotein 2, mitochondrial	NDUFV2	Homo sapiens	1	2	2	2	2	2	2	2	2	2	2	2	2	2	2	2	2	2	2	2	2	2	2022-06-11	2022-06-11	2022-06-11	27.391	249	249	2022-05-03	2	2	2	2	2	2	0	21.004	By MS/MS	By matching	By MS/MS
P83686	sp|P83686|NB5R3_PIG;sp|P00387|NB5R3_HUMAN	sp|P83686|NB5R3_PIG	5;1	5;1	5;1	sp|P83686|NB5R3_PIG NADH-cytochrome b5 reductase 3 (Fragment) OS=Sus scrofa OX=9823 GN=CYB5R3 PE=1 SV=1	NADH-cytochrome b5 reductase 3 (Fragment)	CYB5R3	Sus scrofa	2	5	5	5	5	5	5	4	5	5	5	5	5	4	5	5	5	5	5	4	5	5	25	25	25	30.83	272	272;301	1948-03-01	5	5	5	4	5	5	0	32.867	By MS/MS	By MS/MS	By MS/MS
P28331	sp|P28331|NDUS1_HUMAN	sp|P28331|NDUS1_HUMAN	3	3	3	sp|P28331|NDUS1_HUMAN NADH-ubiquinone oxidoreductase 75 kDa subunit, mitochondrial OS=Homo sapiens OX=9606 GN=NDUFS1 PE=1 SV=3	NADH-ubiquinone oxidoreductase 75 kDa subunit, mitochondrial	NDUFS1	Homo sapiens	1	3	3	3	3	3	3	3	3	3	3	3	3	3	3	3	3	3	3	3	3	3	2022-09-06	2022-09-06	2022-09-06	79.467	727	727	2022-05-03	3	3	3	3	3	3	0	19.889	By MS/MS	By MS/MS	By MS/MS
Q29558	sp|Q29558|MAOX_PIG;sp|P48163|MAOX_HUMAN	sp|Q29558|MAOX_PIG;sp|P48163|MAOX_HUMAN	4;2	4;2	3;1	sp|Q29558|MAOX_PIG NADP-dependent malic enzyme (Fragment) OS=Sus scrofa OX=9823 GN=ME1 PE=2 SV=1;sp|P48163|MAOX_HUMAN NADP-dependent malic enzyme OS=Homo sapiens OX=9606 GN=ME1 PE=1 SV=1	NADP-dependent malic enzyme (Fragment)	ME1	Sus scrofa	2	4	4	3	4	4	4	4	4	4	4	4	4	4	4	4	3	3	3	3	3	3	2022-08-10	2022-08-10	2022-06-08	62.006	557	557;572	1943-03-01	5	5	5	4	4	5	0	75.054	By MS/MS	By MS/MS	By MS/MS
Q13765	sp|Q13765|NACA_HUMAN;sp|E9PAV3|NACAM_HUMAN	sp|Q13765|NACA_HUMAN;sp|E9PAV3|NACAM_HUMAN	2;2	2;2	2;2	sp|Q13765|NACA_HUMAN Nascent polypeptide-associated complex subunit alpha OS=Homo sapiens OX=9606 GN=NACA PE=1 SV=1;sp|E9PAV3|NACAM_HUMAN Nascent polypeptide-associated complex subunit alpha, muscle-specific form OS=Homo sapiens OX=9606 GN=NACA PE=1 SV=1	Nascent polypeptide-associated complex subunit alpha	NACA	Homo sapiens	2	2	2	2	2	2	2	2	2	2	2	2	2	2	2	2	2	2	2	2	2	2	2022-05-13	2022-05-13	2022-05-13	23.384	215	215;2078	2022-05-03	2	2	2	2	2	2	0	71.261	By MS/MS	By MS/MS	By MS/MS
P13591	sp|P13591|NCAM1_HUMAN	sp|P13591|NCAM1_HUMAN	9	9	9	sp|P13591|NCAM1_HUMAN Neural cell adhesion molecule 1 OS=Homo sapiens OX=9606 GN=NCAM1 PE=1 SV=3	Neural cell adhesion molecule 1	NCAM1	Homo sapiens	1	9	9	9	9	9	8	7	6	6	9	9	8	7	6	6	9	9	8	7	6	6	2022-03-13	2022-03-13	2022-03-13	94.573	858	858	2028-03-01	11	11	10	9	8	8	0	178.44	By MS/MS	By MS/MS	By MS/MS
O15394	sp|O15394|NCAM2_HUMAN	sp|O15394|NCAM2_HUMAN	1	1	1	sp|O15394|NCAM2_HUMAN Neural cell adhesion molecule 2 OS=Homo sapiens OX=9606 GN=NCAM2 PE=1 SV=2	Neural cell adhesion molecule 2	NCAM2	Homo sapiens	1	1	1	1	0	1	1	1	1	1	0	1	1	1	1	1	0	1	1	1	1	1	2022-08-01	2022-08-01	2022-08-01	93.045	837	837	4		1	1	1	1	1	0.0043243	67.546		By MS/MS	By matching
Q09666	sp|Q09666|AHNK_HUMAN	sp|Q09666|AHNK_HUMAN	4	4	4	sp|Q09666|AHNK_HUMAN Neuroblast differentiation-associated protein AHNAK OS=Homo sapiens OX=9606 GN=AHNAK PE=1 SV=2	Neuroblast differentiation-associated protein AHNAK	AHNAK	Homo sapiens	1	4	4	4	3	4	3	4	4	3	3	4	3	4	4	3	3	4	3	4	4	3	2022-01-02	2022-01-02	2022-01-02	629.09	5890	5890	1952-03-01	3	4	3	4	4	3	0	23.396	By MS/MS	By MS/MS	By MS/MS
P61601	sp|P61601|NCALD_HUMAN	sp|P61601|NCALD_HUMAN	3	3	3	sp|P61601|NCALD_HUMAN Neurocalcin-delta OS=Homo sapiens OX=9606 GN=NCALD PE=1 SV=2	Neurocalcin-delta	NCALD	Homo sapiens	1	3	3	3	3	3	3	3	3	3	3	3	3	3	3	3	3	3	3	3	3	3	2022-07-19	2022-07-19	2022-07-19	22.245	193	193	2022-05-03	3	3	3	3	3	3	0	18.148	By MS/MS	By MS/MS	By MS/MS
Q9UBB6	sp|Q9UBB6|NCDN_HUMAN	sp|Q9UBB6|NCDN_HUMAN	4	4	4	sp|Q9UBB6|NCDN_HUMAN Neurochondrin OS=Homo sapiens OX=9606 GN=NCDN PE=1 SV=1	Neurochondrin	NCDN	Homo sapiens	1	4	4	4	4	4	3	4	4	4	4	4	3	4	4	4	4	4	3	4	4	4	7	7	7	78.863	729	729	1942-03-01	5	4	3	4	4	4	0	24.932	By MS/MS	By MS/MS	By MS/MS
O94856	sp|O94856|NFASC_HUMAN	sp|O94856|NFASC_HUMAN	1	1	1	sp|O94856|NFASC_HUMAN Neurofascin OS=Homo sapiens OX=9606 GN=NFASC PE=1 SV=4	Neurofascin	NFASC	Homo sapiens	1	1	1	1	1	1	1	1	1	1	1	1	1	1	1	1	1	1	1	1	1	1	2022-01-01	2022-01-01	2022-01-01	150.02	1347	1347	2022-05-03	1	1	1	1	1	1	0.0074153	65.936	By matching	By matching	By matching
P12036	sp|P12036|NFH_HUMAN;sp|P12037|NFH_PIG	sp|P12036|NFH_HUMAN	5;2	4;2	4;2	sp|P12036|NFH_HUMAN Neurofilament heavy polypeptide OS=Homo sapiens OX=9606 GN=NEFH PE=1 SV=4	Neurofilament heavy polypeptide	NEFH	Homo sapiens	2	5	4	4	5	3	1	3	3	0	4	2	1	2	2	0	4	2	1	2	2	0	2022-05-06	2022-05-05	2022-05-05	112.48	1026	1026;142	2022-05-02	5	2	1	2	2		0	23.804	By MS/MS	By MS/MS	By MS/MS
P02547	sp|P02547|NFL_PIG	sp|P02547|NFL_PIG	9	2	2	sp|P02547|NFL_PIG Neurofilament light polypeptide OS=Sus scrofa OX=9823 GN=NEFL PE=1 SV=3	Neurofilament light polypeptide	NEFL	Sus scrofa	1	9	2	2	9	7	6	7	7	6	2	1	1	1	1	1	2	1	1	1	1	1	2022-04-20	2022-02-06	2022-02-06	62.071	549	549	1938-03-01	2	1	1	1	2	1	0	28.337	By MS/MS	By MS/MS	By MS/MS
P07196	sp|P07196|NFL_HUMAN	sp|P07196|NFL_HUMAN	10	9	3	sp|P07196|NFL_HUMAN Neurofilament light polypeptide OS=Homo sapiens OX=9606 GN=NEFL PE=1 SV=3	Neurofilament light polypeptide	NEFL	Homo sapiens	1	10	9	3	9	8	8	8	8	7	8	7	8	7	7	7	2	2	3	2	2	2	2022-03-20	2022-02-18	2022-09-05	61.516	543	543	1947-03-01	8	7	8	7	8	7	0	156.7	By MS/MS	By MS/MS	By MS/MS
P07197	sp|P07197|NFM_HUMAN	sp|P07197|NFM_HUMAN	10	10	1	sp|P07197|NFM_HUMAN Neurofilament medium polypeptide OS=Homo sapiens OX=9606 GN=NEFM PE=1 SV=3	Neurofilament medium polypeptide	NEFM	Homo sapiens	1	10	10	1	10	9	8	6	10	7	10	9	8	6	10	7	1	1	1	0	1	1	2022-06-14	2022-06-14	2022-02-01	102.47	916	916	2027-03-01	13	11	9	6	13	7	0	172.65	By MS/MS	By MS/MS	By MS/MS
P08552	sp|P08552|NFM_PIG	sp|P08552|NFM_PIG	10	1	1	sp|P08552|NFM_PIG Neurofilament medium polypeptide (Fragment) OS=Sus scrofa OX=9823 GN=NEFM PE=1 SV=2	Neurofilament medium polypeptide (Fragment)	NEFM	Sus scrofa	1	10	1	1	10	9	8	7	10	7	1	1	1	1	1	1	1	1	1	1	1	1	29.2	2022-02-02	2022-02-02	51.985	455	455	2022-05-03	1	1	1	1	1	1	0.0024691	8.843	By MS/MS	By MS/MS	By MS/MS
Q7Z3B1	sp|Q7Z3B1|NEGR1_HUMAN	sp|Q7Z3B1|NEGR1_HUMAN	2	2	2	sp|Q7Z3B1|NEGR1_HUMAN Neuronal growth regulator 1 OS=Homo sapiens OX=9606 GN=NEGR1 PE=1 SV=3	Neuronal growth regulator 1	NEGR1	Homo sapiens	1	2	2	2	2	2	2	1	2	2	2	2	2	1	2	2	2	2	2	1	2	2	2022-06-11	2022-06-11	2022-06-11	38.719	354	354	1945-03-01	2	2	2	1	2	2	0	13.515	By MS/MS	By MS/MS	By MS/MS
P51674	sp|P51674|GPM6A_HUMAN	sp|P51674|GPM6A_HUMAN	3	3	3	sp|P51674|GPM6A_HUMAN Neuronal membrane glycoprotein M6-a OS=Homo sapiens OX=9606 GN=GPM6A PE=1 SV=2	Neuronal membrane glycoprotein M6-a	GPM6A	Homo sapiens	1	3	3	3	3	3	3	3	3	2	3	3	3	3	3	2	3	3	3	3	3	2	2022-06-12	2022-06-12	2022-06-12	31.209	278	278	1942-03-01	4	4	4	5	4	3	0	118.25	By MS/MS	By MS/MS	By MS/MS
Q13491	sp|Q13491|GPM6B_HUMAN	sp|Q13491|GPM6B_HUMAN	1	1	1	sp|Q13491|GPM6B_HUMAN Neuronal membrane glycoprotein M6-b OS=Homo sapiens OX=9606 GN=GPM6B PE=1 SV=2	Neuronal membrane glycoprotein M6-b	GPM6B	Homo sapiens	1	1	1	1	1	1	1	1	1	1	1	1	1	1	1	1	1	1	1	1	1	1	2022-09-04	2022-09-04	2022-09-04	28.989	265	265	1933-03-01	2	2	1	1	1	2	0.0034091	73.237	By MS/MS	By MS/MS	By MS/MS
Q9UH03	sp|Q9UH03|SEPT3_HUMAN	sp|Q9UH03|SEPT3_HUMAN	2	2	2	sp|Q9UH03|SEPT3_HUMAN Neuronal-specific septin-3 OS=Homo sapiens OX=9606 GN=SEPTIN3 PE=1 SV=3	Neuronal-specific septin-3	SEPTIN3	Homo sapiens	1	2	2	2	2	2	2	1	2	2	2	2	2	1	2	2	2	2	2	1	2	2	2022-09-08	2022-09-08	2022-09-08	40.703	358	358	1945-03-01	2	2	2	1	2	2	0	12.541	By MS/MS	By MS/MS	By MS/MS
Q9Y639	sp|Q9Y639|NPTN_HUMAN	sp|Q9Y639|NPTN_HUMAN	2	2	2	sp|Q9Y639|NPTN_HUMAN Neuroplastin OS=Homo sapiens OX=9606 GN=NPTN PE=1 SV=2	Neuroplastin	NPTN	Homo sapiens	1	2	2	2	1	2	2	2	1	1	1	2	2	2	1	1	1	2	2	2	1	1	2022-08-06	2022-08-06	2022-08-06	44.387	398	398	1933-03-01	1	2	2	2	1	1	0	12.582	By MS/MS	By MS/MS	By MS/MS
Q9P121	sp|Q9P121|NTRI_HUMAN	sp|Q9P121|NTRI_HUMAN	2	2	2	sp|Q9P121|NTRI_HUMAN Neurotrimin OS=Homo sapiens OX=9606 GN=NTM PE=1 SV=1	Neurotrimin	NTM	Homo sapiens	1	2	2	2	2	2	2	1	1	1	2	2	2	1	1	1	2	2	2	1	1	1	2022-03-11	2022-03-11	2022-03-11	37.971	344	344	3	2	2	2	1	1	1	0	18.053	By MS/MS	By MS/MS	By MS/MS
P79403	sp|P79403|GANAB_PIG;sp|Q14697|GANAB_HUMAN	sp|P79403|GANAB_PIG	16;4	16;4	16;4	sp|P79403|GANAB_PIG Neutral alpha-glucosidase AB OS=Sus scrofa OX=9823 GN=GANAB PE=1 SV=1	Neutral alpha-glucosidase AB	GANAB	Sus scrofa	2	16	16	16	16	15	15	13	13	11	16	15	15	13	13	11	16	15	15	13	13	11	2022-07-25	2022-07-25	2022-07-25	106.66	944	944;944	1933-03-01	18	17	17	15	15	13	0	159.64	By MS/MS	By MS/MS	By MS/MS
Q6PIU2	sp|Q6PIU2|NCEH1_HUMAN	sp|Q6PIU2|NCEH1_HUMAN	1	1	1	sp|Q6PIU2|NCEH1_HUMAN Neutral cholesterol ester hydrolase 1 OS=Homo sapiens OX=9606 GN=NCEH1 PE=1 SV=3	Neutral cholesterol ester hydrolase 1	NCEH1	Homo sapiens	1	1	1	1	1	1	1	1	1	1	1	1	1	1	1	1	1	1	1	1	1	1	2022-09-02	2022-09-02	2022-09-02	45.807	408	408	2022-05-03	1	1	1	1	1	1	0.0043908	69.024	By MS/MS	By MS/MS	By MS/MS
P55769	sp|P55769|NH2L1_HUMAN	sp|P55769|NH2L1_HUMAN	2	2	2	sp|P55769|NH2L1_HUMAN NHP2-like protein 1 OS=Homo sapiens OX=9606 GN=SNU13 PE=1 SV=3	NHP2-like protein 1	SNU13	Homo sapiens	1	2	2	2	2	1	2	1	1	1	2	1	2	1	1	1	2	1	2	1	1	1	2022-08-18	2022-08-18	2022-08-18	14.173	128	128	2022-12-03	2	1	2	1	1	1	0	12.056	By MS/MS	By matching	By MS/MS
Q15233	sp|Q15233|NONO_HUMAN	sp|Q15233|NONO_HUMAN	4	4	4	sp|Q15233|NONO_HUMAN Non-POU domain-containing octamer-binding protein OS=Homo sapiens OX=9606 GN=NONO PE=1 SV=4	Non-POU domain-containing octamer-binding protein	NONO	Homo sapiens	1	4	4	4	4	4	4	4	4	3	4	4	4	4	4	3	4	4	4	4	4	3	2022-08-13	2022-08-13	2022-08-13	54.231	471	471	1939-03-01	4	4	4	4	4	3	0	54.776	By MS/MS	By MS/MS	By MS/MS
Q9UNZ2	sp|Q9UNZ2|NSF1C_HUMAN	sp|Q9UNZ2|NSF1C_HUMAN	3	3	3	sp|Q9UNZ2|NSF1C_HUMAN NSFL1 cofactor p47 OS=Homo sapiens OX=9606 GN=NSFL1C PE=1 SV=2	NSFL1 cofactor p47	NSFL1C	Homo sapiens	1	3	3	3	3	3	3	3	3	3	3	3	3	3	3	3	3	3	3	3	3	3	2022-06-11	2022-06-11	2022-06-11	40.572	370	370	2022-05-03	3	3	3	3	3	3	0	21.897	By MS/MS	By MS/MS	By MS/MS
Q9Y266	sp|Q9Y266|NUDC_HUMAN	sp|Q9Y266|NUDC_HUMAN	2	2	2	sp|Q9Y266|NUDC_HUMAN Nuclear migration protein nudC OS=Homo sapiens OX=9606 GN=NUDC PE=1 SV=1	Nuclear migration protein nudC	NUDC	Homo sapiens	1	2	2	2	1	1	2	1	1	1	1	1	2	1	1	1	1	1	2	1	1	1	2022-02-08	2022-02-08	2022-02-08	38.242	331	331	1943-03-01	1	1	2	1	1	1	0	11.586	By MS/MS	By matching	By MS/MS
Q9H1E3	sp|Q9H1E3|NUCKS_HUMAN	sp|Q9H1E3|NUCKS_HUMAN	1	1	1	sp|Q9H1E3|NUCKS_HUMAN Nuclear ubiquitous casein and cyclin-dependent kinase substrate 1 OS=Homo sapiens OX=9606 GN=NUCKS1 PE=1 SV=1	Nuclear ubiquitous casein and cyclin-dependent kinase substrate 1	NUCKS1	Homo sapiens	1	1	1	1	1	1	1	1	1	1	1	1	1	1	1	1	1	1	1	1	1	1	2022-08-07	2022-08-07	2022-08-07	27.296	243	243	2022-05-03	1	1	1	1	1	1	0	75.52	By MS/MS	By MS/MS	By MS/MS
P19338	sp|P19338|NUCL_HUMAN	sp|P19338|NUCL_HUMAN	6	6	6	sp|P19338|NUCL_HUMAN Nucleolin OS=Homo sapiens OX=9606 GN=NCL PE=1 SV=3	Nucleolin	NCL	Homo sapiens	1	6	6	6	6	6	6	5	6	6	6	6	6	5	6	6	6	6	6	5	6	6	9	9	9	76.613	710	710	1949-03-01	6	6	6	5	6	6	0	71.765	By MS/MS	By MS/MS	By MS/MS
P06748	sp|P06748|NPM_HUMAN	sp|P06748|NPM_HUMAN	4	4	4	sp|P06748|NPM_HUMAN Nucleophosmin OS=Homo sapiens OX=9606 GN=NPM1 PE=1 SV=2	Nucleophosmin	NPM1	Homo sapiens	1	4	4	4	4	4	4	4	4	4	4	4	4	4	4	4	4	4	4	4	4	4	2022-08-22	2022-08-22	2022-08-22	32.575	294	294	2026-03-01	6	5	4	4	4	4	0	56.751	By MS/MS	By MS/MS	By MS/MS
P12270	sp|P12270|TPR_HUMAN	sp|P12270|TPR_HUMAN	2	2	2	sp|P12270|TPR_HUMAN Nucleoprotein TPR OS=Homo sapiens OX=9606 GN=TPR PE=1 SV=3	Nucleoprotein TPR	TPR	Homo sapiens	1	2	2	2	2	2	1	1	1	1	2	2	1	1	1	1	2	2	1	1	1	1	2022-01-01	2022-01-01	2022-01-01	267.29	2363	2363	3	2	2	1	1	1	1	0	13.047	By matching	By MS/MS	By matching
Q13232	sp|Q13232|NDK3_HUMAN	sp|Q13232|NDK3_HUMAN	1	1	1	sp|Q13232|NDK3_HUMAN Nucleoside diphosphate kinase 3 OS=Homo sapiens OX=9606 GN=NME3 PE=1 SV=2	Nucleoside diphosphate kinase 3	NME3	Homo sapiens	1	1	1	1	1	1	1	1	1	1	1	1	1	1	1	1	1	1	1	1	1	1	2022-01-07	2022-01-07	2022-01-07	19.015	169	169	2022-05-03	1	1	1	1	1	1	0.0053305	66.499	By MS/MS	By MS/MS	By MS/MS
P15531	sp|P15531|NDKA_HUMAN	sp|P15531|NDKA_HUMAN	4	4	2	sp|P15531|NDKA_HUMAN Nucleoside diphosphate kinase A OS=Homo sapiens OX=9606 GN=NME1 PE=1 SV=1	Nucleoside diphosphate kinase A	NME1	Homo sapiens	1	4	4	2	4	4	4	4	4	4	4	4	4	4	4	4	2	2	2	2	2	2	32.9	32.9	2022-08-15	17.149	152	152	1962-03-01	6	6	6	7	7	7	0	88.236	By MS/MS	By MS/MS	By MS/MS
Q2EN76	sp|Q2EN76|NDKB_PIG;sp|O60361|NDK8_HUMAN;sp|P22392|NDKB_HUMAN	sp|Q2EN76|NDKB_PIG;sp|O60361|NDK8_HUMAN;sp|P22392|NDKB_HUMAN	4;3;3	2;1;1	2;1;1	sp|Q2EN76|NDKB_PIG Nucleoside diphosphate kinase B OS=Sus scrofa OX=9823 GN=NME2 PE=2 SV=1;sp|O60361|NDK8_HUMAN Putative nucleoside diphosphate kinase OS=Homo sapiens OX=9606 GN=NME2P1 PE=5 SV=1;sp|P22392|NDKB_HUMAN Nucleoside diphosphate kinase B OS=Homo	Nucleoside diphosphate kinase B	NME2	Sus scrofa	3	4	2	2	3	4	4	4	4	4	1	2	2	2	2	2	1	2	2	2	2	2	2022-03-30	2022-02-13	2022-02-13	17.176	152	152;137;152	1973-03-01	1	2	2	2	2	2	0	12.973	By MS/MS	By MS/MS	By MS/MS
P55209	sp|P55209|NP1L1_HUMAN	sp|P55209|NP1L1_HUMAN	3	3	2	sp|P55209|NP1L1_HUMAN Nucleosome assembly protein 1-like 1 OS=Homo sapiens OX=9606 GN=NAP1L1 PE=1 SV=1	Nucleosome assembly protein 1-like 1	NAP1L1	Homo sapiens	1	3	3	2	3	3	3	3	3	2	3	3	3	3	3	2	2	2	2	2	2	2	2022-08-14	2022-08-14	2022-03-12	45.374	391	391	1935-03-01	3	3	3	3	3	2	0	21.031	By MS/MS	By MS/MS	By MS/MS
Q99733	sp|Q99733|NP1L4_HUMAN	sp|Q99733|NP1L4_HUMAN	2	1	1	sp|Q99733|NP1L4_HUMAN Nucleosome assembly protein 1-like 4 OS=Homo sapiens OX=9606 GN=NAP1L4 PE=1 SV=1	Nucleosome assembly protein 1-like 4	NAP1L4	Homo sapiens	1	2	1	1	2	2	2	2	2	1	1	1	1	1	1	1	1	1	1	1	1	1	2022-06-05	2022-09-02	2022-09-02	42.823	375	375	2022-05-03	1	1	1	1	1	1	0.0044004	69.193	By matching	By matching	By MS/MS
Q9NQR4	sp|Q9NQR4|NIT2_HUMAN	sp|Q9NQR4|NIT2_HUMAN	4	4	4	sp|Q9NQR4|NIT2_HUMAN Omega-amidase NIT2 OS=Homo sapiens OX=9606 GN=NIT2 PE=1 SV=1	Omega-amidase NIT2	NIT2	Homo sapiens	1	4	4	4	4	4	4	4	4	4	4	4	4	4	4	4	4	4	4	4	4	4	2022-07-21	2022-07-21	2022-07-21	30.608	276	276	2022-05-03	4	4	4	4	4	4	0	67.036	By MS/MS	By MS/MS	By MS/MS
P04181	sp|P04181|OAT_HUMAN	sp|P04181|OAT_HUMAN	2	2	2	sp|P04181|OAT_HUMAN Ornithine aminotransferase, mitochondrial OS=Homo sapiens OX=9606 GN=OAT PE=1 SV=1	Ornithine aminotransferase, mitochondrial	OAT	Homo sapiens	1	2	2	2	2	2	2	2	2	2	2	2	2	2	2	2	2	2	2	2	2	2	2022-01-07	2022-01-07	2022-01-07	48.534	439	439	2022-08-03	2	2	2	3	3	3	0	41.708	By MS/MS	By MS/MS	By MS/MS
Q8N573	sp|Q8N573|OXR1_HUMAN	sp|Q8N573|OXR1_HUMAN	1	1	1	sp|Q8N573|OXR1_HUMAN Oxidation resistance protein 1 OS=Homo sapiens OX=9606 GN=OXR1 PE=1 SV=2	Oxidation resistance protein 1	OXR1	Homo sapiens	1	1	1	1	1	1	1	1	1	1	1	1	1	1	1	1	1	1	1	1	1	1	2022-07-01	2022-07-01	2022-07-01	97.969	874	874	2022-05-03	1	1	1	1	1	1	0	18.846	By MS/MS	By MS/MS	By MS/MS
P50897	sp|P50897|PPT1_HUMAN	sp|P50897|PPT1_HUMAN	2	2	2	sp|P50897|PPT1_HUMAN Palmitoyl-protein thioesterase 1 OS=Homo sapiens OX=9606 GN=PPT1 PE=1 SV=1	Palmitoyl-protein thioesterase 1	PPT1	Homo sapiens	1	2	2	2	2	2	2	2	2	2	2	2	2	2	2	2	2	2	2	2	2	2	2022-08-09	2022-08-09	2022-08-09	34.193	306	306	2022-05-03	2	2	2	2	2	2	0	12.593	By MS/MS	By MS/MS	By MS/MS
Q2MJV8	sp|Q2MJV8|PALM_PIG	sp|Q2MJV8|PALM_PIG	3	3	3	sp|Q2MJV8|PALM_PIG Paralemmin-1 OS=Sus scrofa OX=9823 GN=PALM PE=2 SV=1	Paralemmin-1	PALM	Sus scrofa	1	3	3	3	3	3	3	2	2	2	3	3	3	2	2	2	3	3	3	2	2	2	2022-04-12	2022-04-12	2022-04-12	42.38	387	387	2022-02-03	3	3	3	2	2	2	0	20.039	By MS/MS	By MS/MS	By MS/MS
Q8WXF1	sp|Q8WXF1|PSPC1_HUMAN	sp|Q8WXF1|PSPC1_HUMAN	2	2	2	sp|Q8WXF1|PSPC1_HUMAN Paraspeckle component 1 OS=Homo sapiens OX=9606 GN=PSPC1 PE=1 SV=1	Paraspeckle component 1	PSPC1	Homo sapiens	1	2	2	2	2	2	2	2	1	1	2	2	2	2	1	1	2	2	2	2	1	1	2022-03-06	2022-03-06	2022-03-06	58.743	523	523	2022-01-03	2	2	2	2	1	1	0	12.298	By MS/MS	By MS/MS	By MS/MS
P20962	sp|P20962|PTMS_HUMAN	sp|P20962|PTMS_HUMAN	3	3	3	sp|P20962|PTMS_HUMAN Parathymosin OS=Homo sapiens OX=9606 GN=PTMS PE=1 SV=2	Parathymosin	PTMS	Homo sapiens	1	3	3	3	2	2	3	3	3	3	2	2	3	3	3	3	2	2	3	3	3	3	2022-05-22	2022-05-22	2022-05-22	1953-11-01	102	102	1962-03-01	3	4	4	5	4	4	0	24.574	By MS/MS	By MS/MS	By MS/MS
Q99497	sp|Q99497|PARK7_HUMAN	sp|Q99497|PARK7_HUMAN	5	5	5	sp|Q99497|PARK7_HUMAN Parkinson disease protein 7 OS=Homo sapiens OX=9606 GN=PARK7 PE=1 SV=2	Parkinson disease protein 7	PARK7	Homo sapiens	1	5	5	5	5	5	5	5	5	5	5	5	5	5	5	5	5	5	5	5	5	5	41.8	41.8	41.8	19.891	189	189	1951-03-01	9	8	8	9	8	9	0	80.46	By MS/MS	By MS/MS	By MS/MS
P62936	sp|P62936|PPIA_PIG;sp|P62937|PPIA_HUMAN;sp|Q9Y536|PAL4A_HUMAN;sp|P0DN26|PAL4F_HUMAN;sp|F5H284|PAL4D_HUMAN;sp|A0A0B4J2A2|PAL4C_HUMAN;sp|A0A075B767|PAL4H_HUMAN;sp|A0A075B759|PAL4E_HUMAN;sp|P0DN37|PAL4G_HUMAN;sp|Q9UNP9|PPIE_HUMAN	sp|P62936|PPIA_PIG;sp|P62937|PPIA_HUMAN	9;6;2;2;2;2;2;2;1;1	9;6;2;2;2;2;2;2;1;1	9;6;2;2;2;2;2;2;1;1	sp|P62936|PPIA_PIG Peptidyl-prolyl cis-trans isomerase A OS=Sus scrofa OX=9823 GN=PPIA PE=1 SV=2;sp|P62937|PPIA_HUMAN Peptidyl-prolyl cis-trans isomerase A OS=Homo sapiens OX=9606 GN=PPIA PE=1 SV=2	Peptidyl-prolyl cis-trans isomerase A	PPIA	Sus scrofa	10	9	9	9	9	9	9	9	9	9	9	9	9	9	9	9	9	9	9	9	9	9	64	64	64	17.869	164	164;165;164;164;164;164;164;164;164;301	1948-03-01	14	15	15	14	14	14	0	112.12	By MS/MS	By MS/MS	By MS/MS
P23284	sp|P23284|PPIB_HUMAN	sp|P23284|PPIB_HUMAN	3	3	3	sp|P23284|PPIB_HUMAN Peptidyl-prolyl cis-trans isomerase B OS=Homo sapiens OX=9606 GN=PPIB PE=1 SV=2	Peptidyl-prolyl cis-trans isomerase B	PPIB	Homo sapiens	1	3	3	3	2	2	2	3	3	3	2	2	2	3	3	3	2	2	2	3	3	3	2022-01-17	2022-01-17	2022-01-17	23.742	216	216	2022-08-03	2	2	2	3	3	3	0	71.239	By MS/MS	By MS/MS	By MS/MS
P62942	sp|P62942|FKB1A_HUMAN	sp|P62942|FKB1A_HUMAN	1	1	1	sp|P62942|FKB1A_HUMAN Peptidyl-prolyl cis-trans isomerase FKBP1A OS=Homo sapiens OX=9606 GN=FKBP1A PE=1 SV=2	Peptidyl-prolyl cis-trans isomerase FKBP1A	FKBP1A	Homo sapiens	1	1	1	1	1	1	1	1	1	1	1	1	1	1	1	1	1	1	1	1	1	1	13	13	13	11.951	108	108	2022-05-03	1	1	1	1	1	1	0.0033076	69.566	By matching	By MS/MS	By matching
Q02790	sp|Q02790|FKBP4_HUMAN	sp|Q02790|FKBP4_HUMAN	2	2	2	sp|Q02790|FKBP4_HUMAN Peptidyl-prolyl cis-trans isomerase FKBP4 OS=Homo sapiens OX=9606 GN=FKBP4 PE=1 SV=3	Peptidyl-prolyl cis-trans isomerase FKBP4	FKBP4	Homo sapiens	1	2	2	2	2	2	2	2	2	2	2	2	2	2	2	2	2	2	2	2	2	2	2022-01-08	2022-01-08	2022-01-08	51.804	459	459	2022-05-03	2	2	3	3	2	2	0	73.258	By MS/MS	By MS/MS	By MS/MS
P23942	sp|P23942|PRPH2_HUMAN	sp|P23942|PRPH2_HUMAN	2	2	2	sp|P23942|PRPH2_HUMAN Peripherin-2 OS=Homo sapiens OX=9606 GN=PRPH2 PE=1 SV=1	Peripherin-2	PRPH2	Homo sapiens	1	2	2	2	2	2	2	2	2	2	2	2	2	2	2	2	2	2	2	2	2	2	2022-08-05	2022-08-05	2022-08-05	39.186	346	346	2022-05-03	2	2	2	2	2	2	0	12.394	By MS/MS	By MS/MS	By MS/MS
Q06830	sp|Q06830|PRDX1_HUMAN	sp|Q06830|PRDX1_HUMAN	5	5	3	sp|Q06830|PRDX1_HUMAN Peroxiredoxin-1 OS=Homo sapiens OX=9606 GN=PRDX1 PE=1 SV=1	Peroxiredoxin-1	PRDX1	Homo sapiens	1	5	5	3	4	5	5	4	3	3	4	5	5	4	3	3	2	3	3	3	2	2	2022-07-30	2022-07-30	2022-01-21	2022-11-22	199	199	2021-03-01	5	6	6	5	4	3	0	70.174	By MS/MS	By MS/MS	By MS/MS
P32119	sp|P32119|PRDX2_HUMAN	sp|P32119|PRDX2_HUMAN	3	1	1	sp|P32119|PRDX2_HUMAN Peroxiredoxin-2 OS=Homo sapiens OX=9606 GN=PRDX2 PE=1 SV=5	Peroxiredoxin-2	PRDX2	Homo sapiens	1	3	1	1	3	3	3	2	3	3	1	1	1	1	1	1	1	1	1	1	1	1	2022-08-26	2022-02-17	2022-02-17	21.892	198	198	1931-03-01	3	2	2	2	2	2	0.0025031	96.207	By MS/MS	By MS/MS	By MS/MS
P52552	sp|P52552|PRDX2_PIG	sp|P52552|PRDX2_PIG	4	4	3	sp|P52552|PRDX2_PIG Peroxiredoxin-2 (Fragment) OS=Sus scrofa OX=9823 GN=PRDX2 PE=2 SV=1	Peroxiredoxin-2 (Fragment)	PRDX2	Sus scrofa	1	4	4	3	4	4	4	3	4	4	4	4	4	3	4	4	3	3	3	3	3	3	2022-06-27	2022-06-27	2022-03-21	13.723	127	127	1962-03-01	5	5	5	5	6	6	0	31.599	By MS/MS	By MS/MS	By MS/MS
Q13162	sp|Q13162|PRDX4_HUMAN	sp|Q13162|PRDX4_HUMAN	2	1	1	sp|Q13162|PRDX4_HUMAN Peroxiredoxin-4 OS=Homo sapiens OX=9606 GN=PRDX4 PE=1 SV=1	Peroxiredoxin-4	PRDX4	Homo sapiens	1	2	1	1	2	2	2	1	1	1	1	1	1	1	1	1	1	1	1	1	1	1	7	2022-01-04	2022-01-04	30.54	271	271	2022-05-03	1	1	1	1	1	1	0	19.507	By MS/MS	By MS/MS	By MS/MS
P30044	sp|P30044|PRDX5_HUMAN	sp|P30044|PRDX5_HUMAN	3	3	3	sp|P30044|PRDX5_HUMAN Peroxiredoxin-5, mitochondrial OS=Homo sapiens OX=9606 GN=PRDX5 PE=1 SV=4	Peroxiredoxin-5, mitochondrial	PRDX5	Homo sapiens	1	3	3	3	2	2	3	3	3	2	2	2	3	3	3	2	2	2	3	3	3	2	22	22	22	22.086	214	214	2022-06-03	2	2	3	3	3	2	0	59.817	By MS/MS	By MS/MS	By MS/MS
Q9TSX9	sp|Q9TSX9|PRDX6_PIG;sp|P30041|PRDX6_HUMAN	sp|Q9TSX9|PRDX6_PIG	5;1	5;1	5;1	sp|Q9TSX9|PRDX6_PIG Peroxiredoxin-6 OS=Sus scrofa OX=9823 GN=PRDX6 PE=2 SV=3	Peroxiredoxin-6	PRDX6	Sus scrofa	2	5	5	5	5	5	5	5	5	4	5	5	5	5	5	4	5	5	5	5	5	4	40.2	40.2	40.2	25.037	224	224;224	1944-03-01	7	7	7	7	7	6	0	214.87	By MS/MS	By MS/MS	By MS/MS
Q9Y285	sp|Q9Y285|SYFA_HUMAN	sp|Q9Y285|SYFA_HUMAN	1	1	1	sp|Q9Y285|SYFA_HUMAN Phenylalanine--tRNA ligase alpha subunit OS=Homo sapiens OX=9606 GN=FARSA PE=1 SV=3	Phenylalanine--tRNA ligase alpha subunit	FARSA	Homo sapiens	1	1	1	1	0	1	1	1	1	1	0	1	1	1	1	1	0	1	1	1	1	1	2022-07-06	2022-07-06	2022-07-06	57.563	508	508	4		1	1	1	1	1	0.0073918	65.847		By MS/MS	By matching
Q9NSD9	sp|Q9NSD9|SYFB_HUMAN	sp|Q9NSD9|SYFB_HUMAN	4	4	4	sp|Q9NSD9|SYFB_HUMAN Phenylalanine--tRNA ligase beta subunit OS=Homo sapiens OX=9606 GN=FARSB PE=1 SV=3	Phenylalanine--tRNA ligase beta subunit	FARSB	Homo sapiens	1	4	4	4	3	3	3	3	4	4	3	3	3	3	4	4	3	3	3	3	4	4	8	8	8	66.115	589	589	2022-07-03	3	3	3	3	4	4	0	23.507	By MS/MS	By MS/MS	By MS/MS
P20941	sp|P20941|PHOS_HUMAN	sp|P20941|PHOS_HUMAN	1	1	1	sp|P20941|PHOS_HUMAN Phosducin OS=Homo sapiens OX=9606 GN=PDC PE=1 SV=1	Phosducin	PDC	Homo sapiens	1	1	1	1	1	1	1	1	1	1	1	1	1	1	1	1	1	1	1	1	1	1	2022-07-05	2022-07-05	2022-07-05	28.246	246	246	2022-05-03	1	1	1	1	1	1	0	19.089	By MS/MS	By MS/MS	By MS/MS
Q00325	sp|Q00325|MPCP_HUMAN	sp|Q00325|MPCP_HUMAN	1	1	1	sp|Q00325|MPCP_HUMAN Phosphate carrier protein, mitochondrial OS=Homo sapiens OX=9606 GN=SLC25A3 PE=1 SV=2	Phosphate carrier protein, mitochondrial	SLC25A3	Homo sapiens	1	1	1	1	1	1	1	1	1	1	1	1	1	1	1	1	1	1	1	1	1	1	2022-03-03	2022-03-03	2022-03-03	40.094	362	362	2022-05-03	1	1	1	1	1	1	0	13.931	By MS/MS	By MS/MS	By MS/MS
P30086	sp|P30086|PEBP1_HUMAN	sp|P30086|PEBP1_HUMAN	5	5	5	sp|P30086|PEBP1_HUMAN Phosphatidylethanolamine-binding protein 1 OS=Homo sapiens OX=9606 GN=PEBP1 PE=1 SV=3	Phosphatidylethanolamine-binding protein 1	PEBP1	Homo sapiens	1	5	5	5	5	5	5	5	5	5	5	5	5	5	5	5	5	5	5	5	5	5	33.2	33.2	33.2	21.057	187	187	1947-03-01	9	9	8	8	8	9	0	323.31	By MS/MS	By MS/MS	By MS/MS
Q00169	sp|Q00169|PIPNA_HUMAN	sp|Q00169|PIPNA_HUMAN	2	2	2	sp|Q00169|PIPNA_HUMAN Phosphatidylinositol transfer protein alpha isoform OS=Homo sapiens OX=9606 GN=PITPNA PE=1 SV=2	Phosphatidylinositol transfer protein alpha isoform	PITPNA	Homo sapiens	1	2	2	2	2	2	2	1	2	2	2	2	2	1	2	2	2	2	2	1	2	2	2022-05-11	2022-05-11	2022-05-11	31.806	270	270	1945-03-01	2	2	2	1	2	2	0	21.357	By MS/MS	By MS/MS	By MS/MS
P48739	sp|P48739|PIPNB_HUMAN	sp|P48739|PIPNB_HUMAN	2	2	2	sp|P48739|PIPNB_HUMAN Phosphatidylinositol transfer protein beta isoform OS=Homo sapiens OX=9606 GN=PITPNB PE=1 SV=2	Phosphatidylinositol transfer protein beta isoform	PITPNB	Homo sapiens	1	2	2	2	2	2	2	1	1	1	2	2	2	1	1	1	2	2	2	1	1	1	2022-03-13	2022-03-13	2022-03-13	31.54	271	271	3	2	2	2	1	1	1	0	11.779	By MS/MS	By MS/MS	By MS/MS
F1RQM2	sp|F1RQM2|AGM1_PIG	sp|F1RQM2|AGM1_PIG	1	1	1	sp|F1RQM2|AGM1_PIG Phosphoacetylglucosamine mutase OS=Sus scrofa OX=9823 GN=PGM3 PE=1 SV=2	Phosphoacetylglucosamine mutase	PGM3	Sus scrofa	1	1	1	1	0	1	0	0	0	0	0	1	0	0	0	0	0	1	0	0	0	0	2022-01-03	2022-01-03	2022-01-03	59.474	542	542	2		1					0.0053591	66.776		By MS/MS
P36871	sp|P36871|PGM1_HUMAN	sp|P36871|PGM1_HUMAN	7	7	7	sp|P36871|PGM1_HUMAN Phosphoglucomutase-1 OS=Homo sapiens OX=9606 GN=PGM1 PE=1 SV=3	Phosphoglucomutase-1	PGM1	Homo sapiens	1	7	7	7	6	7	6	6	6	6	6	7	6	6	6	6	6	7	6	6	6	6	2022-03-25	2022-03-25	2022-03-25	61.448	562	562	1944-03-01	9	10	9	10	9	8	0	323.31	By MS/MS	By MS/MS	By MS/MS
Q7SIB7	sp|Q7SIB7|PGK1_PIG;sp|P00558|PGK1_HUMAN;sp|Q6RI85|PGK2_PIG;sp|P07205|PGK2_HUMAN	sp|Q7SIB7|PGK1_PIG;sp|P00558|PGK1_HUMAN	19;11;5;4	19;11;5;4	19;11;5;4	sp|Q7SIB7|PGK1_PIG Phosphoglycerate kinase 1 OS=Sus scrofa OX=9823 GN=PGK1 PE=1 SV=3;sp|P00558|PGK1_HUMAN Phosphoglycerate kinase 1 OS=Homo sapiens OX=9606 GN=PGK1 PE=1 SV=3	Phosphoglycerate kinase 1	PGK1	Sus scrofa	4	19	19	19	18	18	19	18	18	18	18	18	19	18	18	18	18	18	19	18	18	18	59.2	59.2	59.2	44.558	417	417;417;417;417	1951-03-01	28	28	31	31	27	29	0	323.31	By MS/MS	By MS/MS	By MS/MS
P18669	sp|P18669|PGAM1_HUMAN;sp|P15259|PGAM2_HUMAN;sp|Q8N0Y7|PGAM4_HUMAN	sp|P18669|PGAM1_HUMAN	10;4;3	10;4;3	10;4;3	sp|P18669|PGAM1_HUMAN Phosphoglycerate mutase 1 OS=Homo sapiens OX=9606 GN=PGAM1 PE=1 SV=2	Phosphoglycerate mutase 1	PGAM1	Homo sapiens	3	10	10	10	10	10	10	10	9	10	10	10	10	10	9	10	10	10	10	10	9	10	48.4	48.4	48.4	28.804	254	254;253;254	1945-03-01	14	15	16	14	13	14	0	323.31	By MS/MS	By MS/MS	By MS/MS
Q9Y263	sp|Q9Y263|PLAP_HUMAN	sp|Q9Y263|PLAP_HUMAN	1	1	1	sp|Q9Y263|PLAP_HUMAN Phospholipase A-2-activating protein OS=Homo sapiens OX=9606 GN=PLAA PE=1 SV=2	Phospholipase A-2-activating protein	PLAA	Homo sapiens	1	1	1	1	1	1	1	1	1	1	1	1	1	1	1	1	1	1	1	1	1	1	2022-01-02	2022-01-02	2022-01-02	87.156	795	795	2022-05-03	1	1	1	1	1	1	0.0024661	88.405	By matching	By MS/MS	By matching
P36968	sp|P36968|GPX4_PIG;sp|P36969|GPX4_HUMAN	sp|P36968|GPX4_PIG;sp|P36969|GPX4_HUMAN	2;1	2;1	2;1	sp|P36968|GPX4_PIG Phospholipid hydroperoxide glutathione peroxidase OS=Sus scrofa OX=9823 GN=GPX4 PE=1 SV=3;sp|P36969|GPX4_HUMAN Phospholipid hydroperoxide glutathione peroxidase OS=Homo sapiens OX=9606 GN=GPX4 PE=1 SV=3	Phospholipid hydroperoxide glutathione peroxidase	GPX4	Sus scrofa	2	2	2	2	2	2	2	2	2	2	2	2	2	2	2	2	2	2	2	2	2	2	2022-02-13	2022-02-13	2022-02-13	22.337	197	197;197	2022-05-03	3	3	3	3	3	3	0	16.028	By MS/MS	By MS/MS	By MS/MS
O15305	sp|O15305|PMM2_HUMAN	sp|O15305|PMM2_HUMAN	1	1	1	sp|O15305|PMM2_HUMAN Phosphomannomutase 2 OS=Homo sapiens OX=9606 GN=PMM2 PE=1 SV=1	Phosphomannomutase 2	PMM2	Homo sapiens	1	1	1	1	1	0	0	1	1	1	1	0	0	1	1	1	1	0	0	1	1	1	2022-09-04	2022-09-04	2022-09-04	28.082	246	246	4	1			1	1	1	0.0043526	6.803	By MS/MS
Q14558	sp|Q14558|KPRA_HUMAN	sp|Q14558|KPRA_HUMAN	2	2	2	sp|Q14558|KPRA_HUMAN Phosphoribosyl pyrophosphate synthase-associated protein 1 OS=Homo sapiens OX=9606 GN=PRPSAP1 PE=1 SV=2	Phosphoribosyl pyrophosphate synthase-associated protein 1	PRPSAP1	Homo sapiens	1	2	2	2	2	2	2	2	2	2	2	2	2	2	2	2	2	2	2	2	2	2	2022-07-06	2022-07-06	2022-07-06	39.393	356	356	2022-05-03	2	2	2	2	2	2	0	13.303	By MS/MS	By MS/MS	By MS/MS
Q9Y617	sp|Q9Y617|SERC_HUMAN	sp|Q9Y617|SERC_HUMAN	1	1	1	sp|Q9Y617|SERC_HUMAN Phosphoserine aminotransferase OS=Homo sapiens OX=9606 GN=PSAT1 PE=1 SV=2	Phosphoserine aminotransferase	PSAT1	Homo sapiens	1	1	1	1	1	1	1	1	1	1	1	1	1	1	1	1	1	1	1	1	1	1	2022-08-03	2022-08-03	2022-08-03	40.422	370	370	2022-05-03	1	1	1	1	1	1	0.0033937	72.918	By MS/MS	By MS/MS	By MS/MS
Q5SRE7	sp|Q5SRE7|PHYD1_HUMAN	sp|Q5SRE7|PHYD1_HUMAN	2	2	2	sp|Q5SRE7|PHYD1_HUMAN Phytanoyl-CoA dioxygenase domain-containing protein 1 OS=Homo sapiens OX=9606 GN=PHYHD1 PE=1 SV=2	Phytanoyl-CoA dioxygenase domain-containing protein 1	PHYHD1	Homo sapiens	1	2	2	2	2	2	2	2	2	2	2	2	2	2	2	2	2	2	2	2	2	2	2022-09-08	2022-09-08	2022-09-08	32.41	291	291	2022-05-03	2	2	2	2	2	2	0	1968-11-01	By MS/MS	By MS/MS	By MS/MS
Q9NUJ7	sp|Q9NUJ7|PLCX1_HUMAN	sp|Q9NUJ7|PLCX1_HUMAN	1	1	1	sp|Q9NUJ7|PLCX1_HUMAN PI-PLC X domain-containing protein 1 OS=Homo sapiens OX=9606 GN=PLCXD1 PE=2 SV=1	PI-PLC X domain-containing protein 1	PLCXD1	Homo sapiens	1	1	1	1	1	1	1	1	1	1	1	1	1	1	1	1	1	1	1	1	1	1	2022-09-01	2022-09-01	2022-09-01	36.668	323	323	2022-05-03	1	1	1	1	1	1	0.0013004	11.325	By matching	By MS/MS	By MS/MS
P23220	sp|P23220|AT2B1_PIG;sp|P20020|AT2B1_HUMAN;sp|P23634|AT2B4_HUMAN;sp|Q16720|AT2B3_HUMAN	sp|P23220|AT2B1_PIG;sp|P20020|AT2B1_HUMAN;sp|P23634|AT2B4_HUMAN	13;10;7;5	13;10;7;5	9;6;3;1	sp|P23220|AT2B1_PIG Plasma membrane calcium-transporting ATPase 1 OS=Sus scrofa OX=9823 GN=ATP2B1 PE=2 SV=1;sp|P20020|AT2B1_HUMAN Plasma membrane calcium-transporting ATPase 1 OS=Homo sapiens OX=9606 GN=ATP2B1 PE=1 SV=4;sp|P23634|AT2B4_HUMAN Plasma membran	Plasma membrane calcium-transporting ATPase 1	ATP2B1	Sus scrofa	4	13	13	9	13	13	12	11	12	12	13	13	12	11	12	12	9	9	8	8	8	8	2022-08-17	2022-08-17	2022-07-12	134.71	1220	1220;1220;1241;1220	1946-03-01	13	13	12	11	13	12	0	272.46	By MS/MS	By MS/MS	By MS/MS
Q01814	sp|Q01814|AT2B2_HUMAN	sp|Q01814|AT2B2_HUMAN	8	4	4	sp|Q01814|AT2B2_HUMAN Plasma membrane calcium-transporting ATPase 2 OS=Homo sapiens OX=9606 GN=ATP2B2 PE=1 SV=2	Plasma membrane calcium-transporting ATPase 2	ATP2B2	Homo sapiens	1	8	4	4	8	8	8	7	8	8	4	4	4	4	4	4	4	4	4	4	4	4	2022-05-10	2022-05-05	2022-05-05	136.87	1243	1243	2022-05-03	4	4	4	4	4	4	0	26.945	By MS/MS	By MS/MS	By MS/MS
Q8NC51	sp|Q8NC51|PAIRB_HUMAN	sp|Q8NC51|PAIRB_HUMAN	3	3	3	sp|Q8NC51|PAIRB_HUMAN Plasminogen activator inhibitor 1 RNA-binding protein OS=Homo sapiens OX=9606 GN=SERBP1 PE=1 SV=2	Plasminogen activator inhibitor 1 RNA-binding protein	SERBP1	Homo sapiens	1	3	3	3	2	2	2	1	1	1	2	2	2	1	1	1	2	2	2	1	1	1	2022-03-10	2022-03-10	2022-03-10	44.965	408	408	3	2	2	2	1	1	1	0	23.578	By MS/MS	By MS/MS	By MS/MS
Q9GL51	sp|Q9GL51|LIS1_PIG;sp|P43034|LIS1_HUMAN	sp|Q9GL51|LIS1_PIG;sp|P43034|LIS1_HUMAN	7;7	7;7	7;7	sp|Q9GL51|LIS1_PIG Platelet-activating factor acetylhydrolase IB subunit alpha OS=Sus scrofa OX=9823 GN=PAFAH1B1 PE=2 SV=3;sp|P43034|LIS1_HUMAN Platelet-activating factor acetylhydrolase IB subunit beta OS=Homo sapiens OX=9606 GN=PAFAH1B1 PE=1 SV=2	Platelet-activating factor acetylhydrolase IB subunit alpha	PAFAH1B1	Sus scrofa	2	7	7	7	7	7	6	6	7	6	7	7	6	6	7	6	7	7	6	6	7	6	28	28	28	46.654	410	410;410	1944-03-01	7	7	6	6	7	6	0	87.72	By MS/MS	By MS/MS	By MS/MS
P68402	sp|P68402|PA1B2_HUMAN	sp|P68402|PA1B2_HUMAN	2	2	2	sp|P68402|PA1B2_HUMAN Platelet-activating factor acetylhydrolase IB subunit alpha2 OS=Homo sapiens OX=9606 GN=PAFAH1B2 PE=1 SV=1	Platelet-activating factor acetylhydrolase IB subunit alpha2	PAFAH1B2	Homo sapiens	1	2	2	2	2	2	2	2	2	2	2	2	2	2	2	2	2	2	2	2	2	2	2022-03-18	2022-03-18	2022-03-18	25.569	229	229	1967-03-01	3	3	3	4	5	3	0	2022-11-21	By MS/MS	By MS/MS	By MS/MS
Q15149	sp|Q15149|PLEC_HUMAN	sp|Q15149|PLEC_HUMAN	2	2	2	sp|Q15149|PLEC_HUMAN Plectin OS=Homo sapiens OX=9606 GN=PLEC PE=1 SV=3	Plectin	PLEC	Homo sapiens	1	2	2	2	2	2	2	2	2	2	2	2	2	2	2	2	2	2	2	2	2	2	0.7	0.7	0.7	531.78	4684	4684	2022-05-03	2	2	2	2	2	2	0	11.842	By MS/MS	By MS/MS	By MS/MS
P09874	sp|P09874|PARP1_HUMAN	sp|P09874|PARP1_HUMAN	1	1	1	sp|P09874|PARP1_HUMAN Poly [ADP-ribose] polymerase 1 OS=Homo sapiens OX=9606 GN=PARP1 PE=1 SV=4	Poly [ADP-ribose] polymerase 1	PARP1	Homo sapiens	1	1	1	1	0	1	1	1	1	1	0	1	1	1	1	1	0	1	1	1	1	1	2022-05-01	2022-05-01	2022-05-01	113.08	1014	1014	4		1	1	1	1	1	0.0025126	98.792		By matching	By matching
Q15365	sp|Q15365|PCBP1_HUMAN	sp|Q15365|PCBP1_HUMAN	5	3	3	sp|Q15365|PCBP1_HUMAN Poly(rC)-binding protein 1 OS=Homo sapiens OX=9606 GN=PCBP1 PE=1 SV=2	Poly(rC)-binding protein 1	PCBP1	Homo sapiens	1	5	3	3	5	5	5	5	5	5	3	3	3	3	3	3	3	3	3	3	3	3	2022-08-20	2022-01-12	2022-01-12	37.497	356	356	2022-05-03	3	3	3	3	3	3	0	26.046	By MS/MS	By MS/MS	By MS/MS
Q15366	sp|Q15366|PCBP2_HUMAN	sp|Q15366|PCBP2_HUMAN	8	8	5	sp|Q15366|PCBP2_HUMAN Poly(rC)-binding protein 2 OS=Homo sapiens OX=9606 GN=PCBP2 PE=1 SV=1	Poly(rC)-binding protein 2	PCBP2	Homo sapiens	1	8	8	5	8	8	8	7	8	8	8	8	8	7	8	8	5	5	5	4	5	5	36.2	36.2	2022-08-23	38.58	365	365	2022-05-03	8	8	8	8	8	8	0	114.88	By MS/MS	By MS/MS	By MS/MS
P57721	sp|P57721|PCBP3_HUMAN	sp|P57721|PCBP3_HUMAN	7	4	4	sp|P57721|PCBP3_HUMAN Poly(rC)-binding protein 3 OS=Homo sapiens OX=9606 GN=PCBP3 PE=1 SV=2	Poly(rC)-binding protein 3	PCBP3	Homo sapiens	1	7	4	4	6	6	6	6	6	6	3	3	3	3	3	3	3	3	3	3	3	3	2022-08-31	2022-07-19	2022-07-19	39.465	371	371	2029-03-01	4	4	4	3	3	3	0	43.785	By MS/MS	By MS/MS	By MS/MS
Q9UHX1	sp|Q9UHX1|PUF60_HUMAN	sp|Q9UHX1|PUF60_HUMAN	3	3	3	sp|Q9UHX1|PUF60_HUMAN Poly(U)-binding-splicing factor PUF60 OS=Homo sapiens OX=9606 GN=PUF60 PE=1 SV=1	Poly(U)-binding-splicing factor PUF60	PUF60	Homo sapiens	1	3	3	3	2	2	3	2	2	2	2	2	3	2	2	2	2	2	3	2	2	2	2022-09-07	2022-09-07	2022-09-07	59.875	559	559	1946-03-01	2	2	3	2	2	2	0	19.582	By MS/MS	By MS/MS	By MS/MS
Q9UKA9	sp|Q9UKA9|PTBP2_HUMAN	sp|Q9UKA9|PTBP2_HUMAN	2	2	2	sp|Q9UKA9|PTBP2_HUMAN Polypyrimidine tract-binding protein 2 OS=Homo sapiens OX=9606 GN=PTBP2 PE=1 SV=1	Polypyrimidine tract-binding protein 2	PTBP2	Homo sapiens	1	2	2	2	2	2	2	2	2	1	2	2	2	2	2	1	2	2	2	2	2	1	2022-07-08	2022-07-08	2022-07-08	57.49	531	531	2027-03-01	2	2	2	2	2	1	0	23.349	By MS/MS	By MS/MS	By MS/MS
Q56P28	sp|Q56P28|PRAF3_PIG;sp|O75915|PRAF3_HUMAN	sp|Q56P28|PRAF3_PIG;sp|O75915|PRAF3_HUMAN	1;1	1;1	1;1	sp|Q56P28|PRAF3_PIG PRA1 family protein 3 OS=Sus scrofa OX=9823 GN=ARL6IP5 PE=2 SV=1;sp|O75915|PRAF3_HUMAN PRA1 family protein 3 OS=Homo sapiens OX=9606 GN=ARL6IP5 PE=1 SV=1	PRA1 family protein 3	ARL6IP5	Sus scrofa	2	1	1	1	1	1	1	1	1	1	1	1	1	1	1	1	1	1	1	1	1	1	2022-09-05	2022-09-05	2022-09-05	21.54	188	188;188	2022-05-03	1	1	1	1	1	1	0.0043812	68.448	By MS/MS	By MS/MS	By MS/MS
Q9UHV9	sp|Q9UHV9|PFD2_HUMAN	sp|Q9UHV9|PFD2_HUMAN	2	2	2	sp|Q9UHV9|PFD2_HUMAN Prefoldin subunit 2 OS=Homo sapiens OX=9606 GN=PFDN2 PE=1 SV=1	Prefoldin subunit 2	PFDN2	Homo sapiens	1	2	2	2	1	1	1	2	2	1	1	1	1	2	2	1	1	1	1	2	2	1	2022-09-16	2022-09-16	2022-09-16	16.648	154	154	1975-03-01	1	1	1	2	2	1	0	16.151	By MS/MS	By MS/MS	By MS/MS
Q9NQP4	sp|Q9NQP4|PFD4_HUMAN	sp|Q9NQP4|PFD4_HUMAN	2	2	2	sp|Q9NQP4|PFD4_HUMAN Prefoldin subunit 4 OS=Homo sapiens OX=9606 GN=PFDN4 PE=1 SV=1	Prefoldin subunit 4	PFDN4	Homo sapiens	1	2	2	2	1	2	0	1	0	0	1	2	0	1	0	0	1	2	0	1	0	0	2022-01-20	2022-01-20	2022-01-20	15.314	134	134	2025-02-01	1	2		1			0	13.838	By MS/MS	By MS/MS
Q99471	sp|Q99471|PFD5_HUMAN	sp|Q99471|PFD5_HUMAN	1	1	1	sp|Q99471|PFD5_HUMAN Prefoldin subunit 5 OS=Homo sapiens OX=9606 GN=PFDN5 PE=1 SV=2	Prefoldin subunit 5	PFDN5	Homo sapiens	1	1	1	1	0	1	1	1	1	1	0	1	1	1	1	1	0	1	1	1	1	1	2022-03-12	2022-03-12	2022-03-12	17.328	154	154	4		1	1	1	1	1	0.0024938	94.853		By MS/MS	By matching
Q9UMS4	sp|Q9UMS4|PRP19_HUMAN	sp|Q9UMS4|PRP19_HUMAN	4	4	4	sp|Q9UMS4|PRP19_HUMAN Pre-mRNA-processing factor 19 OS=Homo sapiens OX=9606 GN=PRPF19 PE=1 SV=1	Pre-mRNA-processing factor 19	PRPF19	Homo sapiens	1	4	4	4	4	4	4	4	2	2	4	4	4	4	2	2	4	4	4	4	2	2	2022-07-16	2022-07-16	2022-07-16	55.18	504	504	2022-01-03	4	4	4	4	2	2	0	24.887	By MS/MS	By MS/MS	By MS/MS
O43143	sp|O43143|DHX15_HUMAN	sp|O43143|DHX15_HUMAN	3	3	3	sp|O43143|DHX15_HUMAN Pre-mRNA-splicing factor ATP-dependent RNA helicase DHX15 OS=Homo sapiens OX=9606 GN=DHX15 PE=1 SV=2	Pre-mRNA-splicing factor ATP-dependent RNA helicase DHX15	DHX15	Homo sapiens	1	3	3	3	1	1	2	2	2	2	1	1	2	2	2	2	1	1	2	2	2	2	2022-07-04	2022-07-04	2022-07-04	90.932	795	795	2022-09-03	1	1	2	2	2	2	0	17.146	By MS/MS	By MS/MS	By MS/MS
Q9UHG3	sp|Q9UHG3|PCYOX_HUMAN	sp|Q9UHG3|PCYOX_HUMAN	1	1	1	sp|Q9UHG3|PCYOX_HUMAN Prenylcysteine oxidase 1 OS=Homo sapiens OX=9606 GN=PCYOX1 PE=1 SV=3	Prenylcysteine oxidase 1	PCYOX1	Homo sapiens	1	1	1	1	1	1	1	1	1	1	1	1	1	1	1	1	1	1	1	1	1	1	2022-06-02	2022-06-02	2022-06-02	56.639	505	505	2022-05-03	1	1	1	1	1	1	0.0073684	6.573	By MS/MS	By MS/MS	By matching
Q92841	sp|Q92841|DDX17_HUMAN;sp|P17844|DDX5_HUMAN	sp|Q92841|DDX17_HUMAN	10;2	10;2	10;2	sp|Q92841|DDX17_HUMAN Probable ATP-dependent RNA helicase DDX17 OS=Homo sapiens OX=9606 GN=DDX17 PE=1 SV=2	Probable ATP-dependent RNA helicase DDX17	DDX17	Homo sapiens	2	10	10	10	10	10	10	9	10	9	10	10	10	9	10	9	10	10	10	9	10	9	2022-09-20	2022-09-20	2022-09-20	80.272	729	729;614	1935-03-01	12	11	11	10	10	9	0	88.692	By MS/MS	By MS/MS	By MS/MS
P26196	sp|P26196|DDX6_HUMAN	sp|P26196|DDX6_HUMAN	3	3	3	sp|P26196|DDX6_HUMAN Probable ATP-dependent RNA helicase DDX6 OS=Homo sapiens OX=9606 GN=DDX6 PE=1 SV=2	Probable ATP-dependent RNA helicase DDX6	DDX6	Homo sapiens	1	3	3	3	3	3	3	2	2	2	3	3	3	2	2	2	3	3	3	2	2	2	2022-05-09	2022-05-09	2022-05-09	54.416	483	483	2022-02-03	3	3	3	2	2	2	0	17.745	By MS/MS	By MS/MS	By MS/MS
P07737	sp|P07737|PROF1_HUMAN	sp|P07737|PROF1_HUMAN	1	1	1	sp|P07737|PROF1_HUMAN Profilin-1 OS=Homo sapiens OX=9606 GN=PFN1 PE=1 SV=2	Profilin-1	PFN1	Homo sapiens	1	1	1	1	1	1	1	1	1	1	1	1	1	1	1	1	1	1	1	1	1	1	2022-04-11	2022-04-11	2022-04-11	15.054	140	140	2022-05-03	1	1	1	1	1	1	0	20.035	By MS/MS	By MS/MS	By MS/MS
P35080	sp|P35080|PROF2_HUMAN	sp|P35080|PROF2_HUMAN	3	3	3	sp|P35080|PROF2_HUMAN Profilin-2 OS=Homo sapiens OX=9606 GN=PFN2 PE=1 SV=3	Profilin-2	PFN2	Homo sapiens	1	3	3	3	3	3	3	3	3	3	3	3	3	3	3	3	3	3	3	3	3	3	2022-03-29	2022-03-29	2022-03-29	15.046	140	140	2022-05-03	3	3	3	3	3	3	0	46.47	By MS/MS	By MS/MS	By MS/MS
Q8WUM4	sp|Q8WUM4|PDC6I_HUMAN	sp|Q8WUM4|PDC6I_HUMAN	4	4	4	sp|Q8WUM4|PDC6I_HUMAN Programmed cell death 6-interacting protein OS=Homo sapiens OX=9606 GN=PDCD6IP PE=1 SV=1	Programmed cell death 6-interacting protein	PDCD6IP	Homo sapiens	1	4	4	4	4	3	2	1	2	2	4	3	2	1	2	2	4	3	2	1	2	2	2022-05-05	2022-05-05	2022-05-05	96.022	868	868	3	4	3	2	1	2	2	0	27.523	By MS/MS	By MS/MS	By MS/MS
O14737	sp|O14737|PDCD5_HUMAN	sp|O14737|PDCD5_HUMAN	1	1	1	sp|O14737|PDCD5_HUMAN Programmed cell death protein 5 OS=Homo sapiens OX=9606 GN=PDCD5 PE=1 SV=3	Programmed cell death protein 5	PDCD5	Homo sapiens	1	1	1	1	1	1	1	1	1	1	1	1	1	1	1	1	1	1	1	1	1	1	2022-04-10	2022-04-10	2022-04-10	14.285	125	125	2022-05-03	1	1	1	1	1	1	0.0033223	70.088	By MS/MS	By MS/MS	By MS/MS
P35232	sp|P35232|PHB_HUMAN	sp|P35232|PHB_HUMAN	3	3	3	sp|P35232|PHB_HUMAN Prohibitin OS=Homo sapiens OX=9606 GN=PHB PE=1 SV=1	Prohibitin	PHB	Homo sapiens	1	3	3	3	2	3	2	2	1	1	2	3	2	2	1	1	2	3	2	2	1	1	2022-04-15	2022-04-15	2022-04-15	29.804	272	272	3	2	3	2	2	1	1	0	18.067	By MS/MS	By MS/MS	By MS/MS
Q99623	sp|Q99623|PHB2_HUMAN	sp|Q99623|PHB2_HUMAN	1	1	1	sp|Q99623|PHB2_HUMAN Prohibitin-2 OS=Homo sapiens OX=9606 GN=PHB2 PE=1 SV=2	Prohibitin-2	PHB2	Homo sapiens	1	1	1	1	1	1	1	1	1	1	1	1	1	1	1	1	1	1	1	1	1	1	2022-07-05	2022-07-05	2022-07-05	33.296	299	299	2022-05-03	1	1	1	1	1	1	0.0033186	69.896	By MS/MS	By MS/MS	By MS/MS
Q9UQ80	sp|Q9UQ80|PA2G4_HUMAN	sp|Q9UQ80|PA2G4_HUMAN	4	4	4	sp|Q9UQ80|PA2G4_HUMAN Proliferation-associated protein 2G4 OS=Homo sapiens OX=9606 GN=PA2G4 PE=1 SV=3	Proliferation-associated protein 2G4	PA2G4	Homo sapiens	1	4	4	4	4	3	3	3	3	3	4	3	3	3	3	3	4	3	3	3	3	3	14	14	14	43.786	394	394	1937-03-01	4	3	3	3	3	3	0	23.161	By MS/MS	By MS/MS	By MS/MS
Q07954	sp|Q07954|LRP1_HUMAN	sp|Q07954|LRP1_HUMAN	2	2	2	sp|Q07954|LRP1_HUMAN Prolow-density lipoprotein receptor-related protein 1 OS=Homo sapiens OX=9606 GN=LRP1 PE=1 SV=2	Prolow-density lipoprotein receptor-related protein 1	LRP1	Homo sapiens	1	2	2	2	2	2	2	2	2	1	2	2	2	2	2	1	2	2	2	2	2	1	0.5	0.5	0.5	504.6	4544	4544	2027-03-01	2	2	2	2	2	1	0	11.581	By MS/MS	By MS/MS	By MS/MS
P23687	sp|P23687|PPCE_PIG;sp|P48147|PPCE_HUMAN	sp|P23687|PPCE_PIG;sp|P48147|PPCE_HUMAN	13;9	13;9	13;9	sp|P23687|PPCE_PIG Prolyl endopeptidase OS=Sus scrofa OX=9823 GN=PREP PE=1 SV=1;sp|P48147|PPCE_HUMAN Prolyl endopeptidase OS=Homo sapiens OX=9606 GN=PREP PE=1 SV=2	Prolyl endopeptidase	PREP	Sus scrofa	2	13	13	13	10	12	12	12	11	11	10	12	12	12	11	11	10	12	12	12	11	11	2022-05-31	2022-05-31	2022-05-31	80.769	710	710;710	1951-03-01	10	12	12	12	11	11	0	92.626	By MS/MS	By MS/MS	By MS/MS
Q15185	sp|Q15185|TEBP_HUMAN	sp|Q15185|TEBP_HUMAN	2	2	2	sp|Q15185|TEBP_HUMAN Prostaglandin E synthase 3 OS=Homo sapiens OX=9606 GN=PTGES3 PE=1 SV=1	Prostaglandin E synthase 3	PTGES3	Homo sapiens	1	2	2	2	2	2	2	2	2	2	2	2	2	2	2	2	2	2	2	2	2	2	2022-08-18	2022-08-18	2022-08-18	18.697	160	160	1969-03-01	2	2	2	2	2	3	0	20.075	By MS/MS	By MS/MS	By MS/MS
Q29095	sp|Q29095|PTGDS_PIG	sp|Q29095|PTGDS_PIG	3	3	3	sp|Q29095|PTGDS_PIG Prostaglandin-H2 D-isomerase OS=Sus scrofa OX=9823 GN=PTGDS PE=1 SV=1	Prostaglandin-H2 D-isomerase	PTGDS	Sus scrofa	1	3	3	3	1	3	3	1	1	1	1	3	3	1	1	1	1	3	3	1	1	1	31.2	31.2	31.2	20.568	189	189	3	1	4	4	1	1	1	0	33.104	By MS/MS	By MS/MS	By MS/MS
A9CQL8	sp|A9CQL8|PXL2B_PIG;sp|Q8TBF2|PXL2B_HUMAN	sp|A9CQL8|PXL2B_PIG;sp|Q8TBF2|PXL2B_HUMAN	2;1	2;1	2;1	sp|A9CQL8|PXL2B_PIG Prostamide/prostaglandin F synthase OS=Sus scrofa OX=9823 GN=PRXL2B PE=1 SV=1;sp|Q8TBF2|PXL2B_HUMAN Prostamide/prostaglandin F synthase OS=Homo sapiens OX=9606 GN=PRXL2B PE=1 SV=1	Prostamide/prostaglandin F synthase	PRXL2B	Sus scrofa	2	2	2	2	1	1	1	1	2	2	1	1	1	1	2	2	1	1	1	1	2	2	2022-08-16	2022-08-16	2022-08-16	21.547	202	202;198	4	1	1	1	1	2	2	0	12.073	By matching	By matching	By matching
Q64L94	sp|Q64L94|PSME1_PIG;sp|Q06323|PSME1_HUMAN	sp|Q64L94|PSME1_PIG;sp|Q06323|PSME1_HUMAN	5;4	5;4	5;4	sp|Q64L94|PSME1_PIG Proteasome activator complex subunit 1 OS=Sus scrofa OX=9823 GN=PSME1 PE=2 SV=1;sp|Q06323|PSME1_HUMAN Proteasome activator complex subunit 1 OS=Homo sapiens OX=9606 GN=PSME1 PE=1 SV=1	Proteasome activator complex subunit 1	PSME1	Sus scrofa	2	5	5	5	5	5	5	2	3	3	5	5	5	2	3	3	5	5	5	2	3	3	2022-09-24	2022-09-24	2022-09-24	28.617	249	249;249	2022-09-03	5	5	5	2	3	3	0	31.487	By MS/MS	By MS/MS	By MS/MS
P25786	sp|P25786|PSA1_HUMAN	sp|P25786|PSA1_HUMAN	3	3	3	sp|P25786|PSA1_HUMAN Proteasome subunit alpha type-1 OS=Homo sapiens OX=9606 GN=PSMA1 PE=1 SV=1	Proteasome subunit alpha type-1	PSMA1	Homo sapiens	1	3	3	3	3	3	3	3	3	3	3	3	3	3	3	3	3	3	3	3	3	3	2022-03-18	2022-03-18	2022-03-18	29.555	263	263	2022-05-03	3	3	3	3	3	3	0	20.753	By MS/MS	By MS/MS	By MS/MS
P25787	sp|P25787|PSA2_HUMAN	sp|P25787|PSA2_HUMAN	3	3	3	sp|P25787|PSA2_HUMAN Proteasome subunit alpha type-2 OS=Homo sapiens OX=9606 GN=PSMA2 PE=1 SV=2	Proteasome subunit alpha type-2	PSMA2	Homo sapiens	1	3	3	3	1	3	1	0	0	1	1	3	1	0	0	1	1	3	1	0	0	1	2022-01-23	2022-01-23	2022-01-23	25.898	234	234	1967-02-01	1	3	1			1	0	21.248	By matching	By MS/MS	By matching
P25788	sp|P25788|PSA3_HUMAN	sp|P25788|PSA3_HUMAN	2	2	2	sp|P25788|PSA3_HUMAN Proteasome subunit alpha type-3 OS=Homo sapiens OX=9606 GN=PSMA3 PE=1 SV=2	Proteasome subunit alpha type-3	PSMA3	Homo sapiens	1	2	2	2	1	2	2	1	1	1	1	2	2	1	1	1	1	2	2	1	1	1	2022-04-09	2022-04-09	2022-04-09	28.433	255	255	2025-03-01	1	2	2	1	1	1	0	2028-12-01	By MS/MS	By MS/MS	By matching
P25789	sp|P25789|PSA4_HUMAN	sp|P25789|PSA4_HUMAN	3	3	3	sp|P25789|PSA4_HUMAN Proteasome subunit alpha type-4 OS=Homo sapiens OX=9606 GN=PSMA4 PE=1 SV=1	Proteasome subunit alpha type-4	PSMA4	Homo sapiens	1	3	3	3	3	3	3	3	3	3	3	3	3	3	3	3	3	3	3	3	3	3	2022-02-19	2022-02-19	2022-02-19	29.483	261	261	1945-03-01	4	3	4	4	4	3	0	50.482	By MS/MS	By MS/MS	By MS/MS
P28066	sp|P28066|PSA5_HUMAN	sp|P28066|PSA5_HUMAN	6	6	6	sp|P28066|PSA5_HUMAN Proteasome subunit alpha type-5 OS=Homo sapiens OX=9606 GN=PSMA5 PE=1 SV=3	Proteasome subunit alpha type-5	PSMA5	Homo sapiens	1	6	6	6	6	6	6	6	6	6	6	6	6	6	6	6	6	6	6	6	6	6	44	44	44	26.411	241	241	2022-05-03	6	6	6	6	6	6	0	105.05	By MS/MS	By MS/MS	By MS/MS
P60900	sp|P60900|PSA6_HUMAN	sp|P60900|PSA6_HUMAN	6	6	6	sp|P60900|PSA6_HUMAN Proteasome subunit alpha type-6 OS=Homo sapiens OX=9606 GN=PSMA6 PE=1 SV=1	Proteasome subunit alpha type-6	PSMA6	Homo sapiens	1	6	6	6	5	5	5	5	5	4	5	5	5	5	5	4	5	5	5	5	5	4	32.1	32.1	32.1	27.399	246	246	1941-03-01	5	5	5	5	5	4	0	37.648	By MS/MS	By MS/MS	By MS/MS
O14818	sp|O14818|PSA7_HUMAN;sp|Q8TAA3|PSMA8_HUMAN	sp|O14818|PSA7_HUMAN;sp|Q8TAA3|PSMA8_HUMAN	2;2	2;2	2;2	sp|O14818|PSA7_HUMAN Proteasome subunit alpha type-7 OS=Homo sapiens OX=9606 GN=PSMA7 PE=1 SV=1;sp|Q8TAA3|PSMA8_HUMAN Proteasome subunit alpha-type 8 OS=Homo sapiens OX=9606 GN=PSMA8 PE=2 SV=3	Proteasome subunit alpha type-7	PSMA7	Homo sapiens	2	2	2	2	2	2	2	2	2	2	2	2	2	2	2	2	2	2	2	2	2	2	2022-05-14	2022-05-14	2022-05-14	27.887	248	248;256	2022-05-03	2	2	2	2	2	2	0	17.441	By MS/MS	By MS/MS	By MS/MS
P20618	sp|P20618|PSB1_HUMAN	sp|P20618|PSB1_HUMAN	1	1	1	sp|P20618|PSB1_HUMAN Proteasome subunit beta type-1 OS=Homo sapiens OX=9606 GN=PSMB1 PE=1 SV=2	Proteasome subunit beta type-1	PSMB1	Homo sapiens	1	1	1	1	1	1	1	1	1	1	1	1	1	1	1	1	1	1	1	1	1	1	2022-08-05	2022-08-05	2022-08-05	26.489	241	241	2022-05-03	1	1	1	1	1	1	0.0034404	74.025	By matching	By matching	By MS/MS
P49720	sp|P49720|PSB3_HUMAN	sp|P49720|PSB3_HUMAN	3	3	3	sp|P49720|PSB3_HUMAN Proteasome subunit beta type-3 OS=Homo sapiens OX=9606 GN=PSMB3 PE=1 SV=2	Proteasome subunit beta type-3	PSMB3	Homo sapiens	1	3	3	3	2	2	2	3	2	2	2	2	2	3	2	2	2	2	2	3	2	2	2022-04-23	2022-04-23	2022-04-23	22.949	205	205	1954-03-01	2	2	2	3	2	2	0	53.167	By MS/MS	By MS/MS	By MS/MS
Q29384	sp|Q29384|PSB4_PIG;sp|P28070|PSB4_HUMAN	sp|Q29384|PSB4_PIG;sp|P28070|PSB4_HUMAN	3;2	3;2	3;2	sp|Q29384|PSB4_PIG Proteasome subunit beta type-4 (Fragment) OS=Sus scrofa OX=9823 GN=PSMB4 PE=2 SV=1;sp|P28070|PSB4_HUMAN Proteasome subunit beta type-4 OS=Homo sapiens OX=9606 GN=PSMB4 PE=1 SV=4	Proteasome subunit beta type-4 (Fragment)	PSMB4	Sus scrofa	2	3	3	3	2	2	2	2	2	3	2	2	2	2	2	3	2	2	2	2	2	3	37	37	37	16.816	154	154;264	1969-03-01	2	2	2	2	2	3	0	24.412	By MS/MS	By MS/MS	By MS/MS
P28074	sp|P28074|PSB5_HUMAN	sp|P28074|PSB5_HUMAN	3	3	3	sp|P28074|PSB5_HUMAN Proteasome subunit beta type-5 OS=Homo sapiens OX=9606 GN=PSMB5 PE=1 SV=3	Proteasome subunit beta type-5	PSMB5	Homo sapiens	1	3	3	3	2	2	2	2	3	3	2	2	2	2	3	3	2	2	2	2	3	3	16	16	16	28.48	263	263	1979-03-01	2	2	2	2	3	3	0	22.103	By MS/MS	By MS/MS	By MS/MS
Q99873	sp|Q99873|ANM1_HUMAN	sp|Q99873|ANM1_HUMAN	3	3	3	sp|Q99873|ANM1_HUMAN Protein arginine N-methyltransferase 1 OS=Homo sapiens OX=9606 GN=PRMT1 PE=1 SV=3	Protein arginine N-methyltransferase 1	PRMT1	Homo sapiens	1	3	3	3	3	3	3	3	3	3	3	3	3	3	3	3	3	3	3	3	3	3	2022-08-10	2022-08-10	2022-08-10	42.461	371	371	2022-05-03	3	3	3	3	3	3	0	19.871	By MS/MS	By MS/MS	By MS/MS
Q9Y2B0	sp|Q9Y2B0|CNPY2_HUMAN	sp|Q9Y2B0|CNPY2_HUMAN	2	2	2	sp|Q9Y2B0|CNPY2_HUMAN Protein canopy homolog 2 OS=Homo sapiens OX=9606 GN=CNPY2 PE=1 SV=1	Protein canopy homolog 2	CNPY2	Homo sapiens	1	2	2	2	2	2	2	2	2	2	2	2	2	2	2	2	2	2	2	2	2	2	2022-06-17	2022-06-17	2022-06-17	20.652	182	182	2022-05-03	2	2	2	2	2	2	0	13.969	By MS/MS	By MS/MS	By MS/MS
P35659	sp|P35659|DEK_HUMAN	sp|P35659|DEK_HUMAN	2	2	2	sp|P35659|DEK_HUMAN Protein DEK OS=Homo sapiens OX=9606 GN=DEK PE=1 SV=1	Protein DEK	DEK	Homo sapiens	1	2	2	2	2	1	1	2	1	1	2	1	1	2	1	1	2	1	1	2	1	1	2022-07-06	2022-07-06	2022-07-06	42.674	375	375	2025-03-01	2	1	1	2	1	1	0	12.042	By MS/MS	By MS/MS	By matching
P07237	sp|P07237|PDIA1_HUMAN	sp|P07237|PDIA1_HUMAN	5	5	5	sp|P07237|PDIA1_HUMAN Protein disulfide-isomerase OS=Homo sapiens OX=9606 GN=P4HB PE=1 SV=3	Protein disulfide-isomerase	P4HB	Homo sapiens	1	5	5	5	5	5	5	5	5	5	5	5	5	5	5	5	5	5	5	5	5	5	2022-06-12	2022-06-12	2022-06-12	57.116	508	508	2022-05-03	6	6	6	6	6	6	0	114.16	By MS/MS	By MS/MS	By MS/MS
P30101	sp|P30101|PDIA3_HUMAN	sp|P30101|PDIA3_HUMAN	12	12	12	sp|P30101|PDIA3_HUMAN Protein disulfide-isomerase A3 OS=Homo sapiens OX=9606 GN=PDIA3 PE=1 SV=4	Protein disulfide-isomerase A3	PDIA3	Homo sapiens	1	12	12	12	12	12	12	12	11	12	12	12	12	12	11	12	12	12	12	12	11	12	2022-09-29	2022-09-29	2022-09-29	56.782	505	505	1945-03-01	14	13	12	13	12	13	0	154.6	By MS/MS	By MS/MS	By MS/MS
P13667	sp|P13667|PDIA4_HUMAN	sp|P13667|PDIA4_HUMAN	1	1	1	sp|P13667|PDIA4_HUMAN Protein disulfide-isomerase A4 OS=Homo sapiens OX=9606 GN=PDIA4 PE=1 SV=2	Protein disulfide-isomerase A4	PDIA4	Homo sapiens	1	1	1	1	0	1	1	0	0	0	0	1	1	0	0	0	0	1	1	0	0	0	2022-05-02	2022-05-02	2022-05-02	72.932	645	645	2022-05-02		1	1				0.003386	72.566		By MS/MS	By MS/MS
Q15084	sp|Q15084|PDIA6_HUMAN	sp|Q15084|PDIA6_HUMAN	3	3	3	sp|Q15084|PDIA6_HUMAN Protein disulfide-isomerase A6 OS=Homo sapiens OX=9606 GN=PDIA6 PE=1 SV=1	Protein disulfide-isomerase A6	PDIA6	Homo sapiens	1	3	3	3	3	3	3	3	3	3	3	3	3	3	3	3	3	3	3	3	3	3	2022-05-09	2022-05-09	2022-05-09	48.121	440	440	2022-05-03	3	3	3	3	3	3	0	25.82	By MS/MS	By MS/MS	By MS/MS
Q52LJ0	sp|Q52LJ0|FA98B_HUMAN	sp|Q52LJ0|FA98B_HUMAN	2	2	2	sp|Q52LJ0|FA98B_HUMAN Protein FAM98B OS=Homo sapiens OX=9606 GN=FAM98B PE=1 SV=2	Protein FAM98B	FAM98B	Homo sapiens	1	2	2	2	2	2	2	2	2	2	2	2	2	2	2	2	2	2	2	2	2	2	6	6	6	45.547	433	433	2022-05-03	2	2	2	2	2	2	0	18.317	By MS/MS	By MS/MS	By MS/MS
Q9BY11	sp|Q9BY11|PACN1_HUMAN	sp|Q9BY11|PACN1_HUMAN	5	5	5	sp|Q9BY11|PACN1_HUMAN Protein kinase C and casein kinase substrate in neurons protein 1 OS=Homo sapiens OX=9606 GN=PACSIN1 PE=1 SV=1	Protein kinase C and casein kinase substrate in neurons protein 1	PACSIN1	Homo sapiens	1	5	5	5	5	5	5	5	5	5	5	5	5	5	5	5	5	5	5	5	5	5	2022-05-13	2022-05-13	2022-05-13	50.965	444	444	2022-05-03	5	5	5	5	5	5	0	102.82	By MS/MS	By MS/MS	By MS/MS
Q9UN36	sp|Q9UN36|NDRG2_HUMAN	sp|Q9UN36|NDRG2_HUMAN	3	3	3	sp|Q9UN36|NDRG2_HUMAN Protein NDRG2 OS=Homo sapiens OX=9606 GN=NDRG2 PE=1 SV=2	Protein NDRG2	NDRG2	Homo sapiens	1	3	3	3	2	2	3	3	3	3	2	2	3	3	3	3	2	2	3	3	3	3	14	14	14	40.798	371	371	1975-03-01	2	2	3	3	3	3	0	23.172	By MS/MS	By MS/MS	By MS/MS
Q9ULP0	sp|Q9ULP0|NDRG4_HUMAN	sp|Q9ULP0|NDRG4_HUMAN	2	2	2	sp|Q9ULP0|NDRG4_HUMAN Protein NDRG4 OS=Homo sapiens OX=9606 GN=NDRG4 PE=1 SV=2	Protein NDRG4	NDRG4	Homo sapiens	1	2	2	2	2	2	2	2	2	2	2	2	2	2	2	2	2	2	2	2	2	2	2022-08-12	2022-08-12	2022-08-12	38.458	352	352	1962-03-01	2	2	2	2	3	2	0	13.428	By MS/MS	By MS/MS	By MS/MS
P35813	sp|P35813|PPM1A_HUMAN	sp|P35813|PPM1A_HUMAN	3	3	3	sp|P35813|PPM1A_HUMAN Protein phosphatase 1A OS=Homo sapiens OX=9606 GN=PPM1A PE=1 SV=1	Protein phosphatase 1A	PPM1A	Homo sapiens	1	3	3	3	2	2	2	2	3	3	2	2	2	2	3	3	2	2	2	2	3	3	2022-03-12	2022-03-12	2022-03-12	42.447	382	382	2022-06-03	3	2	2	2	3	3	0	19.47	By MS/MS	By MS/MS	By matching
O75688	sp|O75688|PPM1B_HUMAN	sp|O75688|PPM1B_HUMAN	1	1	1	sp|O75688|PPM1B_HUMAN Protein phosphatase 1B OS=Homo sapiens OX=9606 GN=PPM1B PE=1 SV=1	Protein phosphatase 1B	PPM1B	Homo sapiens	1	1	1	1	1	1	1	1	1	1	1	1	1	1	1	1	1	1	1	1	1	1	2022-08-03	2022-08-03	2022-08-03	52.642	479	479	2022-05-03	1	1	1	1	1	1	0.0094241	65.291	By MS/MS	By MS/MS	By MS/MS
Q8WY54	sp|Q8WY54|PPM1E_HUMAN	sp|Q8WY54|PPM1E_HUMAN	2	2	2	sp|Q8WY54|PPM1E_HUMAN Protein phosphatase 1E OS=Homo sapiens OX=9606 GN=PPM1E PE=1 SV=3	Protein phosphatase 1E	PPM1E	Homo sapiens	1	2	2	2	2	2	2	2	2	2	2	2	2	2	2	2	2	2	2	2	2	2	2022-03-03	2022-03-03	2022-03-03	83.951	755	755	2022-05-03	2	2	2	2	2	2	0.0025413	10.788	By MS/MS	By MS/MS	By MS/MS
Q9Y570	sp|Q9Y570|PPME1_HUMAN	sp|Q9Y570|PPME1_HUMAN	3	3	3	sp|Q9Y570|PPME1_HUMAN Protein phosphatase methylesterase 1 OS=Homo sapiens OX=9606 GN=PPME1 PE=1 SV=3	Protein phosphatase methylesterase 1	PPME1	Homo sapiens	1	3	3	3	3	3	3	3	3	3	3	3	3	3	3	3	3	3	3	3	3	3	2022-01-09	2022-01-09	2022-01-09	42.315	386	386	2022-05-03	3	3	3	3	3	3	0	17.371	By MS/MS	By MS/MS	By MS/MS
P23297	sp|P23297|S10A1_HUMAN	sp|P23297|S10A1_HUMAN	2	2	2	sp|P23297|S10A1_HUMAN Protein S100-A1 OS=Homo sapiens OX=9606 GN=S100A1 PE=1 SV=2	Protein S100-A1	S100A1	Homo sapiens	1	2	2	2	2	2	2	2	2	2	2	2	2	2	2	2	2	2	2	2	2	2	38.3	38.3	38.3	10.546	94	94	1942-03-01	5	6	7	5	5	5	0	323.31	By MS/MS	By MS/MS	By MS/MS
P31950	sp|P31950|S10AB_PIG	sp|P31950|S10AB_PIG	1	1	1	sp|P31950|S10AB_PIG Protein S100-A11 OS=Sus scrofa OX=9823 GN=S100A11 PE=1 SV=1	Protein S100-A11	S100A11	Sus scrofa	1	1	1	1	1	1	1	1	1	1	1	1	1	1	1	1	1	1	1	1	1	1	2022-01-11	2022-01-11	2022-01-11	2018-11-01	99	99	2022-05-03	1	1	1	1	1	1	0.0033822	72.352	By MS/MS	By MS/MS	By MS/MS
Q9HCY8	sp|Q9HCY8|S10AE_HUMAN	sp|Q9HCY8|S10AE_HUMAN	3	3	3	sp|Q9HCY8|S10AE_HUMAN Protein S100-A14 OS=Homo sapiens OX=9606 GN=S100A14 PE=1 SV=1	Protein S100-A14	S100A14	Homo sapiens	1	3	3	3	3	3	3	3	3	3	3	3	3	3	3	3	3	3	3	3	3	3	35.6	35.6	35.6	11.662	104	104	2022-05-03	3	3	3	3	3	3	0	323.31	By MS/MS	By MS/MS	By MS/MS
Q96FQ6	sp|Q96FQ6|S10AG_HUMAN	sp|Q96FQ6|S10AG_HUMAN	1	1	1	sp|Q96FQ6|S10AG_HUMAN Protein S100-A16 OS=Homo sapiens OX=9606 GN=S100A16 PE=1 SV=1	Protein S100-A16	S100A16	Homo sapiens	1	1	1	1	1	1	1	1	1	1	1	1	1	1	1	1	1	1	1	1	1	1	2022-07-11	2022-07-11	2022-07-11	11.801	103	103	2022-05-03	1	1	1	1	1	1	0.0024155	82.703	By MS/MS	By MS/MS	By MS/MS
P55735	sp|P55735|SEC13_HUMAN	sp|P55735|SEC13_HUMAN	1	1	1	sp|P55735|SEC13_HUMAN Protein SEC13 homolog OS=Homo sapiens OX=9606 GN=SEC13 PE=1 SV=3	Protein SEC13 homolog	SEC13	Homo sapiens	1	1	1	1	1	0	0	0	0	0	1	0	0	0	0	0	1	0	0	0	0	0	2022-01-08	2022-01-08	2022-01-08	35.54	322	322	1	1						0.0025157	10.103	By MS/MS
Q01105	sp|Q01105|SET_HUMAN;sp|P0DME0|SETLP_HUMAN	sp|Q01105|SET_HUMAN;sp|P0DME0|SETLP_HUMAN	4;3	4;3	4;3	sp|Q01105|SET_HUMAN Protein SET OS=Homo sapiens OX=9606 GN=SET PE=1 SV=3;sp|P0DME0|SETLP_HUMAN Protein SETSIP OS=Homo sapiens OX=9606 GN=SETSIP PE=1 SV=1	Protein SET	SET	Homo sapiens	2	4	4	4	4	4	4	4	4	4	4	4	4	4	4	4	4	4	4	4	4	4	2022-03-18	2022-03-18	2022-03-18	33.488	290	290;302	2022-05-03	5	5	5	5	5	5	0	107.09	By MS/MS	By MS/MS	By MS/MS
Q15437	sp|Q15437|SC23B_HUMAN	sp|Q15437|SC23B_HUMAN	1	1	1	sp|Q15437|SC23B_HUMAN Protein transport protein Sec23B OS=Homo sapiens OX=9606 GN=SEC23B PE=1 SV=2	Protein transport protein Sec23B	SEC23B	Homo sapiens	1	1	1	1	0	0	0	0	1	1	0	0	0	0	1	1	0	0	0	0	1	1	2022-03-02	2022-03-02	2022-03-02	86.478	767	767	2022-05-05					1	1	0.0023923	80.759
Q13432	sp|Q13432|U119A_HUMAN	sp|Q13432|U119A_HUMAN	4	4	4	sp|Q13432|U119A_HUMAN Protein unc-119 homolog A OS=Homo sapiens OX=9606 GN=UNC119 PE=1 SV=1	Protein unc-119 homolog A	UNC119	Homo sapiens	1	4	4	4	3	3	3	3	3	4	3	3	3	3	3	4	3	3	3	3	3	4	2022-02-26	2022-02-26	2022-02-26	26.962	240	240	2022-05-03	4	3	3	3	3	4	0	46.228	By MS/MS	By MS/MS	By MS/MS
P80895	sp|P80895|PIMT_PIG;sp|P22061|PIMT_HUMAN	sp|P80895|PIMT_PIG;sp|P22061|PIMT_HUMAN	4;3	4;3	4;3	sp|P80895|PIMT_PIG Protein-L-isoaspartate(D-aspartate) O-methyltransferase OS=Sus scrofa OX=9823 GN=PCMT1 PE=1 SV=3;sp|P22061|PIMT_HUMAN Protein-L-isoaspartate(D-aspartate) O-methyltransferase OS=Homo sapiens OX=9606 GN=PCMT1 PE=1 SV=4	Protein-L-isoaspartate(D-aspartate) O-methyltransferase	PCMT1	Sus scrofa	2	4	4	4	4	4	4	4	4	4	4	4	4	4	4	4	4	4	4	4	4	4	35.7	35.7	35.7	24.646	227	227;227	1946-03-01	4	5	5	6	4	4	0	30.419	By MS/MS	By MS/MS	By MS/MS
P06454	sp|P06454|PTMA_HUMAN	sp|P06454|PTMA_HUMAN	5	5	5	sp|P06454|PTMA_HUMAN Prothymosin alpha OS=Homo sapiens OX=9606 GN=PTMA PE=1 SV=2	Prothymosin alpha	PTMA	Homo sapiens	1	5	5	5	5	5	5	5	5	5	5	5	5	5	5	5	5	5	5	5	5	5	36.9	36.9	36.9	12.203	111	111	1962-03-01	6	6	6	7	7	7	0	172.13	By MS/MS	By MS/MS	By MS/MS
P00491	sp|P00491|PNPH_HUMAN	sp|P00491|PNPH_HUMAN	2	2	2	sp|P00491|PNPH_HUMAN Purine nucleoside phosphorylase OS=Homo sapiens OX=9606 GN=PNP PE=1 SV=2	Purine nucleoside phosphorylase	PNP	Homo sapiens	1	2	2	2	2	2	2	2	2	2	2	2	2	2	2	2	2	2	2	2	2	2	2022-07-09	2022-07-09	2022-07-09	32.118	289	289	1946-03-01	2	2	3	2	2	2	0	25.833	By MS/MS	By MS/MS	By MS/MS
P55786	sp|P55786|PSA_HUMAN;sp|A6NEC2|PSAL_HUMAN	sp|P55786|PSA_HUMAN	5;2	5;2	5;2	sp|P55786|PSA_HUMAN Puromycin-sensitive aminopeptidase OS=Homo sapiens OX=9606 GN=NPEPPS PE=1 SV=2	Puromycin-sensitive aminopeptidase	NPEPPS	Homo sapiens	2	5	5	5	5	5	5	2	2	2	5	5	5	2	2	2	5	5	5	2	2	2	2022-01-11	2022-01-11	2022-01-11	103.28	919	919;478	1986-02-01	5	5	5	2	2	2	0	53.662	By MS/MS	By MS/MS	By MS/MS
Q5VTE0	sp|Q5VTE0|EF1A3_HUMAN;sp|P68104|EF1A1_HUMAN	sp|Q5VTE0|EF1A3_HUMAN;sp|P68104|EF1A1_HUMAN	14;14	14;14	7;7	sp|Q5VTE0|EF1A3_HUMAN Putative elongation factor 1-alpha-like 3 OS=Homo sapiens OX=9606 GN=EEF1A1P5 PE=5 SV=1;sp|P68104|EF1A1_HUMAN Elongation factor 1-alpha 1 OS=Homo sapiens OX=9606 GN=EEF1A1 PE=1 SV=1	Putative elongation factor 1-alpha-like 3	EEF1A1P5	Homo sapiens	2	14	14	7	14	14	13	13	13	13	14	14	13	13	13	13	7	7	7	6	6	6	35.9	35.9	2022-01-20	50.184	462	462;462	1946-03-01	18	18	18	17	17	17	0	134.47	By MS/MS	By MS/MS	By MS/MS
Q58FF6	sp|Q58FF6|H90B4_HUMAN	sp|Q58FF6|H90B4_HUMAN	6	2	2	sp|Q58FF6|H90B4_HUMAN Putative heat shock protein HSP 90-beta 4 OS=Homo sapiens OX=9606 GN=HSP90AB4P PE=5 SV=1	Putative heat shock protein HSP 90-beta 4	HSP90AB4P	Homo sapiens	1	6	2	2	6	6	6	6	5	5	2	2	2	2	1	1	2	2	2	2	1	1	2022-07-08	2022-04-02	2022-04-02	58.264	505	505	2022-01-03	2	2	2	2	1	1	0	50.442	By MS/MS	By MS/MS	By MS/MS
Q9Y383	sp|Q9Y383|LC7L2_HUMAN	sp|Q9Y383|LC7L2_HUMAN	1	1	1	sp|Q9Y383|LC7L2_HUMAN Putative RNA-binding protein Luc7-like 2 OS=Homo sapiens OX=9606 GN=LUC7L2 PE=1 SV=2	Putative RNA-binding protein Luc7-like 2	LUC7L2	Homo sapiens	1	1	1	1	0	1	1	1	1	1	0	1	1	1	1	1	0	1	1	1	1	1	2022-08-03	2022-08-03	2022-08-03	46.513	392	392	4		1	1	1	1	1	0	13.751		By matching	By MS/MS
O46560	sp|O46560|PDXK_PIG	sp|O46560|PDXK_PIG	2	2	2	sp|O46560|PDXK_PIG Pyridoxal kinase OS=Sus scrofa OX=9823 GN=PDXK PE=1 SV=1	Pyridoxal kinase	PDXK	Sus scrofa	1	2	2	2	1	2	2	1	1	1	1	2	2	1	1	1	1	2	2	1	1	1	2022-08-11	2022-08-11	2022-08-11	35.613	322	322	2025-03-01	1	2	2	1	1	1	0	19.577	By MS/MS	By MS/MS	By MS/MS
Q96GD0	sp|Q96GD0|PLPP_HUMAN	sp|Q96GD0|PLPP_HUMAN	1	1	1	sp|Q96GD0|PLPP_HUMAN Pyridoxal phosphate phosphatase OS=Homo sapiens OX=9606 GN=PDXP PE=1 SV=2	Pyridoxal phosphate phosphatase	PDXP	Homo sapiens	1	1	1	1	0	1	1	1	1	1	0	1	1	1	1	1	0	1	1	1	1	1	2022-04-04	2022-04-04	2022-04-04	31.698	296	296	4		1	1	1	1	1	0.0023148	75.727		By MS/MS	By MS/MS
P11498	sp|P11498|PYC_HUMAN	sp|P11498|PYC_HUMAN	2	2	2	sp|P11498|PYC_HUMAN Pyruvate carboxylase, mitochondrial OS=Homo sapiens OX=9606 GN=PC PE=1 SV=2	Pyruvate carboxylase, mitochondrial	PC	Homo sapiens	1	2	2	2	2	2	2	1	2	2	2	2	2	1	2	2	2	2	2	1	2	2	3	3	3	129.63	1178	1178	1945-03-01	2	2	2	1	2	2	0	13.006	By MS/MS	By MS/MS	By MS/MS
P29804	sp|P29804|ODPA_PIG;sp|P08559|ODPA_HUMAN;sp|P29803|ODPAT_HUMAN	sp|P29804|ODPA_PIG;sp|P08559|ODPA_HUMAN	9;7;1	9;7;1	9;7;1	sp|P29804|ODPA_PIG Pyruvate dehydrogenase E1 component subunit alpha, somatic form, mitochondrial (Fragment) OS=Sus scrofa OX=9823 GN=PDHA1 PE=1 SV=1;sp|P08559|ODPA_HUMAN Pyruvate dehydrogenase E1 component subunit alpha, somatic form, mitochondrial OS=Hom	Pyruvate dehydrogenase E1 component subunit alpha, somatic form, mitochondrial (Fragment)	PDHA1	Sus scrofa	3	9	9	9	8	8	7	7	8	7	8	8	7	7	8	7	8	8	7	7	8	7	39.6	39.6	39.6	43.121	389	389;390;388	1944-03-01	9	9	9	8	9	8	0	70.595	By MS/MS	By MS/MS	By MS/MS
P11177	sp|P11177|ODPB_HUMAN	sp|P11177|ODPB_HUMAN	6	6	6	sp|P11177|ODPB_HUMAN Pyruvate dehydrogenase E1 component subunit beta, mitochondrial OS=Homo sapiens OX=9606 GN=PDHB PE=1 SV=3	Pyruvate dehydrogenase E1 component subunit beta, mitochondrial	PDHB	Homo sapiens	1	6	6	6	4	4	6	6	5	4	4	4	6	6	5	4	4	4	6	6	5	4	2022-04-30	2022-04-30	2022-04-30	39.233	359	359	1941-03-01	5	5	7	6	5	4	0	56.747	By MS/MS	By MS/MS	By MS/MS
P14618	sp|P14618|KPYM_HUMAN;sp|P30613|KPYR_HUMAN	sp|P14618|KPYM_HUMAN	28;1	28;1	28;1	sp|P14618|KPYM_HUMAN Pyruvate kinase PKM OS=Homo sapiens OX=9606 GN=PKM PE=1 SV=4	Pyruvate kinase PKM	PKM	Homo sapiens	2	28	28	28	28	27	27	27	26	27	28	27	27	27	26	27	28	27	27	27	26	27	49.3	49.3	49.3	57.936	531	531;574	1955-03-01	50	53	55	56	54	56	0	323.31	By MS/MS	By MS/MS	By MS/MS
Q0MVN8	sp|Q0MVN8|QOR_PIG	sp|Q0MVN8|QOR_PIG	2	2	2	sp|Q0MVN8|QOR_PIG Quinone oxidoreductase OS=Sus scrofa OX=9823 GN=CRYZ PE=2 SV=1	Quinone oxidoreductase	CRYZ	Sus scrofa	1	2	2	2	1	2	2	1	1	0	1	2	2	1	1	0	1	2	2	1	1	0	2022-02-11	2022-02-11	2022-02-11	34.996	329	329	1986-02-01	1	2	2	1	1		0.0012887	11.242	By MS/MS	By MS/MS	By matching
P31150	sp|P31150|GDIA_HUMAN	sp|P31150|GDIA_HUMAN	11	11	8	sp|P31150|GDIA_HUMAN Rab GDP dissociation inhibitor alpha OS=Homo sapiens OX=9606 GN=GDI1 PE=1 SV=2	Rab GDP dissociation inhibitor alpha	GDI1	Homo sapiens	1	11	11	8	9	11	10	10	9	9	9	11	10	10	9	9	6	8	7	7	6	6	41.2	41.2	2022-04-28	50.582	447	447	1948-03-01	14	16	16	15	15	14	0	323.31	By MS/MS	By MS/MS	By MS/MS
Q6Q7J2	sp|Q6Q7J2|GDIB_PIG	sp|Q6Q7J2|GDIB_PIG	9	7	4	sp|Q6Q7J2|GDIB_PIG Rab GDP dissociation inhibitor beta OS=Sus scrofa OX=9823 GN=GDI2 PE=2 SV=1	Rab GDP dissociation inhibitor beta	GDI2	Sus scrofa	1	9	7	4	9	9	9	9	9	9	7	7	7	7	7	7	4	4	4	4	4	4	34.2	2022-06-25	2022-05-13	50.267	445	445	2022-05-03	8	8	8	8	8	8	0	146.31	By MS/MS	By MS/MS	By MS/MS
P52306	sp|P52306|GDS1_HUMAN	sp|P52306|GDS1_HUMAN	4	4	4	sp|P52306|GDS1_HUMAN Rap1 GTPase-GDP dissociation stimulator 1 OS=Homo sapiens OX=9606 GN=RAP1GDS1 PE=1 SV=3	Rap1 GTPase-GDP dissociation stimulator 1	RAP1GDS1	Homo sapiens	1	4	4	4	4	4	4	4	4	3	4	4	4	4	4	3	4	4	4	4	4	3	2022-04-09	2022-04-09	2022-04-09	66.316	607	607	1939-03-01	4	4	4	4	4	3	0	28.247	By MS/MS	By MS/MS	By MS/MS
P63000	sp|P63000|RAC1_HUMAN;sp|P60763|RAC3_HUMAN;sp|P15153|RAC2_HUMAN	sp|P63000|RAC1_HUMAN;sp|P60763|RAC3_HUMAN;sp|P15153|RAC2_HUMAN	2;2;2	1;1;1	1;1;1	sp|P63000|RAC1_HUMAN Ras-related C3 botulinum toxin substrate 1 OS=Homo sapiens OX=9606 GN=RAC1 PE=1 SV=1;sp|P60763|RAC3_HUMAN Ras-related C3 botulinum toxin substrate 3 OS=Homo sapiens OX=9606 GN=RAC3 PE=1 SV=1;sp|P15153|RAC2_HUMAN Ras-related C3 botulinu	Ras-related C3 botulinum toxin substrate 1	RAC1	Homo sapiens	3	2	1	1	2	2	1	2	2	2	1	1	1	1	1	1	1	1	1	1	1	1	2022-06-14	2022-09-08	2022-09-08	21.45	192	192;192;192	2022-05-03	1	1	1	1	1	1	0	36.593	By MS/MS	By MS/MS	By matching
P61026	sp|P61026|RAB10_HUMAN	sp|P61026|RAB10_HUMAN	2	2	2	sp|P61026|RAB10_HUMAN Ras-related protein Rab-10 OS=Homo sapiens OX=9606 GN=RAB10 PE=1 SV=1	Ras-related protein Rab-10	RAB10	Homo sapiens	1	2	2	2	2	2	2	2	2	2	2	2	2	2	2	2	2	2	2	2	2	2	2022-05-11	2022-05-11	2022-05-11	22.541	200	200	2022-05-03	2	2	2	2	2	2	0	13.022	By MS/MS	By MS/MS	By MS/MS
Q15907	sp|Q15907|RB11B_HUMAN;sp|Q52NJ1|RB11A_PIG;sp|P62491|RB11A_HUMAN	sp|Q15907|RB11B_HUMAN;sp|Q52NJ1|RB11A_PIG;sp|P62491|RB11A_HUMAN	5;4;4	5;4;4	5;4;4	sp|Q15907|RB11B_HUMAN Ras-related protein Rab-11B OS=Homo sapiens OX=9606 GN=RAB11B PE=1 SV=4;sp|Q52NJ1|RB11A_PIG Ras-related protein Rab-11A OS=Sus scrofa OX=9823 GN=RAB11A PE=2 SV=3;sp|P62491|RB11A_HUMAN Ras-related protein Rab-11A OS=Homo sapiens OX=960	Ras-related protein Rab-11B	RAB11B	Homo sapiens	3	5	5	5	5	5	5	5	4	4	5	5	5	5	4	4	5	5	5	5	4	4	32.1	32.1	32.1	24.488	218	218;216;216	1936-03-01	5	5	5	5	4	4	0	42.288	By MS/MS	By MS/MS	By MS/MS
Q52NJ6	sp|Q52NJ6|RAB14_PIG;sp|P61106|RAB14_HUMAN	sp|Q52NJ6|RAB14_PIG;sp|P61106|RAB14_HUMAN	5;5	5;5	5;5	sp|Q52NJ6|RAB14_PIG Ras-related protein Rab-14 OS=Sus scrofa OX=9823 GN=RAB14 PE=2 SV=3;sp|P61106|RAB14_HUMAN Ras-related protein Rab-14 OS=Homo sapiens OX=9606 GN=RAB14 PE=1 SV=4	Ras-related protein Rab-14	RAB14	Sus scrofa	2	5	5	5	5	5	5	5	5	5	5	5	5	5	5	5	5	5	5	5	5	5	32.1	32.1	32.1	23.927	215	215;215	1957-03-01	6	6	6	6	6	7	0	72.398	By MS/MS	By MS/MS	By MS/MS
Q9NP72	sp|Q9NP72|RAB18_HUMAN	sp|Q9NP72|RAB18_HUMAN	4	4	4	sp|Q9NP72|RAB18_HUMAN Ras-related protein Rab-18 OS=Homo sapiens OX=9606 GN=RAB18 PE=1 SV=1	Ras-related protein Rab-18	RAB18	Homo sapiens	1	4	4	4	3	3	4	4	4	4	3	3	4	4	4	4	3	3	4	4	4	4	2022-07-27	2022-07-27	2022-07-27	22.977	206	206	1968-03-01	3	3	4	4	4	4	0	33.751	By MS/MS	By MS/MS	By MS/MS
Q52NJ2	sp|Q52NJ2|RAB1A_PIG;sp|P62820|RAB1A_HUMAN;sp|Q9H0U4|RAB1B_HUMAN;sp|Q06AU7|RAB1B_PIG;sp|Q92928|RAB1C_HUMAN	sp|Q52NJ2|RAB1A_PIG;sp|P62820|RAB1A_HUMAN;sp|Q9H0U4|RAB1B_HUMAN;sp|Q06AU7|RAB1B_PIG	3;3;2;2;1	3;3;2;2;1	3;3;2;2;1	sp|Q52NJ2|RAB1A_PIG Ras-related protein Rab-1A OS=Sus scrofa OX=9823 GN=RAB1A PE=2 SV=3;sp|P62820|RAB1A_HUMAN Ras-related protein Rab-1A OS=Homo sapiens OX=9606 GN=RAB1A PE=1 SV=3;sp|Q9H0U4|RAB1B_HUMAN Ras-related protein Rab-1B OS=Homo sapiens OX=9606 GN=	Ras-related protein Rab-1A	RAB1A	Sus scrofa	5	3	3	3	2	2	2	3	3	3	2	2	2	3	3	3	2	2	2	3	3	3	2022-04-25	2022-04-25	2022-04-25	22.605	205	205;205;201;201;201	2022-08-03	2	2	2	3	3	3	0	25.713	By MS/MS	By MS/MS	By MS/MS
P61019	sp|P61019|RAB2A_HUMAN;sp|Q8WUD1|RAB2B_HUMAN	sp|P61019|RAB2A_HUMAN;sp|Q8WUD1|RAB2B_HUMAN	4;2	4;2	4;2	sp|P61019|RAB2A_HUMAN Ras-related protein Rab-2A OS=Homo sapiens OX=9606 GN=RAB2A PE=1 SV=1;sp|Q8WUD1|RAB2B_HUMAN Ras-related protein Rab-2B OS=Homo sapiens OX=9606 GN=RAB2B PE=1 SV=1	Ras-related protein Rab-2A	RAB2A	Homo sapiens	2	4	4	4	4	4	3	3	4	3	4	4	3	3	4	3	4	4	3	3	4	3	2022-04-26	2022-04-26	2022-04-26	23.545	212	212;216	1941-03-01	4	4	3	4	4	3	0	84.495	By MS/MS	By MS/MS	By MS/MS
P20336	sp|P20336|RAB3A_HUMAN;sp|Q06AU3|RAB3A_PIG;sp|O95716|RAB3D_HUMAN	sp|P20336|RAB3A_HUMAN;sp|Q06AU3|RAB3A_PIG	4;4;1	4;4;1	4;4;1	sp|P20336|RAB3A_HUMAN Ras-related protein Rab-3A OS=Homo sapiens OX=9606 GN=RAB3A PE=1 SV=1;sp|Q06AU3|RAB3A_PIG Ras-related protein Rab-3A OS=Sus scrofa OX=9823 GN=RAB3A PE=2 SV=1	Ras-related protein Rab-3A	RAB3A	Homo sapiens	3	4	4	4	4	4	4	4	4	4	4	4	4	4	4	4	4	4	4	4	4	4	30	30	30	24.984	220	220;220;219	1944-03-01	7	8	9	7	7	7	0	182.43	By MS/MS	By MS/MS	By MS/MS
Q96E17	sp|Q96E17|RAB3C_HUMAN	sp|Q96E17|RAB3C_HUMAN	2	2	2	sp|Q96E17|RAB3C_HUMAN Ras-related protein Rab-3C OS=Homo sapiens OX=9606 GN=RAB3C PE=1 SV=1	Ras-related protein Rab-3C	RAB3C	Homo sapiens	1	2	2	2	2	2	2	1	2	2	2	2	2	1	2	2	2	2	2	1	2	2	2022-05-14	2022-05-14	2022-05-14	25.952	227	227	1967-03-01	2	2	2	1	2	3	0	12.076	By MS/MS	By MS/MS	By MS/MS
P61020	sp|P61020|RAB5B_HUMAN	sp|P61020|RAB5B_HUMAN	4	4	3	sp|P61020|RAB5B_HUMAN Ras-related protein Rab-5B OS=Homo sapiens OX=9606 GN=RAB5B PE=1 SV=1	Ras-related protein Rab-5B	RAB5B	Homo sapiens	1	4	4	3	3	3	2	4	4	4	3	3	2	4	4	4	2	2	1	3	3	3	26	26	2022-09-20	23.707	215	215	1975-03-01	3	3	2	4	4	4	0	36.334	By MS/MS	By MS/MS	By MS/MS
P51148	sp|P51148|RAB5C_HUMAN	sp|P51148|RAB5C_HUMAN	3	2	2	sp|P51148|RAB5C_HUMAN Ras-related protein Rab-5C OS=Homo sapiens OX=9606 GN=RAB5C PE=1 SV=2	Ras-related protein Rab-5C	RAB5C	Homo sapiens	1	3	2	2	2	3	2	2	1	1	1	2	1	1	0	0	1	2	1	1	0	0	2022-01-17	12	12	23.482	216	216	2022-04-02	1	2	1	1			0	13.499	By MS/MS	By MS/MS	By MS/MS
Q9NRW1	sp|Q9NRW1|RAB6B_HUMAN;sp|P20340|RAB6A_HUMAN;sp|Q14964|RB39A_HUMAN	sp|Q9NRW1|RAB6B_HUMAN;sp|P20340|RAB6A_HUMAN;sp|Q14964|RB39A_HUMAN	1;1;1	1;1;1	1;1;1	sp|Q9NRW1|RAB6B_HUMAN Ras-related protein Rab-6B OS=Homo sapiens OX=9606 GN=RAB6B PE=1 SV=1;sp|P20340|RAB6A_HUMAN Ras-related protein Rab-6A OS=Homo sapiens OX=9606 GN=RAB6A PE=1 SV=3;sp|Q14964|RB39A_HUMAN Ras-related protein Rab-39A OS=Homo sapiens OX=960	Ras-related protein Rab-6B	RAB6B	Homo sapiens	3	1	1	1	1	1	1	1	1	1	1	1	1	1	1	1	1	1	1	1	1	1	2022-03-05	2022-03-05	2022-03-05	23.461	208	208;208;217	2022-05-03	2	2	2	2	2	2	0.0012853	2017-11-01	By MS/MS	By MS/MS	By MS/MS
P51149	sp|P51149|RAB7A_HUMAN	sp|P51149|RAB7A_HUMAN	4	4	4	sp|P51149|RAB7A_HUMAN Ras-related protein Rab-7a OS=Homo sapiens OX=9606 GN=RAB7A PE=1 SV=1	Ras-related protein Rab-7a	RAB7A	Homo sapiens	1	4	4	4	4	4	4	3	3	3	4	4	4	3	3	3	4	4	4	3	3	3	2022-06-25	2022-06-25	2022-06-25	23.489	207	207	2029-03-01	4	4	4	3	3	3	0	30.46	By MS/MS	By MS/MS	By MS/MS
P11234	sp|P11234|RALB_HUMAN	sp|P11234|RALB_HUMAN	1	1	1	sp|P11234|RALB_HUMAN Ras-related protein Ral-B OS=Homo sapiens OX=9606 GN=RALB PE=1 SV=1	Ras-related protein Ral-B	RALB	Homo sapiens	1	1	1	1	1	1	1	1	0	1	1	1	1	1	0	1	1	1	1	1	0	1	2022-08-06	2022-08-06	2022-08-06	23.408	206	206	2022-02-03	1	1	1	1		1	0.0023392	76.726	By MS/MS	By MS/MS	By MS/MS
P61224	sp|P61224|RAP1B_HUMAN;sp|A6NIZ1|RP1BL_HUMAN	sp|P61224|RAP1B_HUMAN;sp|A6NIZ1|RP1BL_HUMAN	2;2	2;2	1;1	sp|P61224|RAP1B_HUMAN Ras-related protein Rap-1b OS=Homo sapiens OX=9606 GN=RAP1B PE=1 SV=1;sp|A6NIZ1|RP1BL_HUMAN Ras-related protein Rap-1b-like protein OS=Homo sapiens OX=9606 PE=2 SV=1	Ras-related protein Rap-1b	RAP1B	Homo sapiens	2	2	2	1	2	2	2	2	2	2	2	2	2	2	2	2	1	1	1	1	1	1	2022-02-15	2022-02-15	2022-01-07	20.825	184	184;184	2022-05-03	2	2	2	2	2	2	0	25.309	By MS/MS	By MS/MS	By MS/MS
P63246	sp|P63246|RACK1_PIG;sp|P63244|RACK1_HUMAN	sp|P63246|RACK1_PIG;sp|P63244|RACK1_HUMAN	6;6	6;6	6;6	sp|P63246|RACK1_PIG Receptor of activated protein C kinase 1 OS=Sus scrofa OX=9823 GN=RACK1 PE=1 SV=3;sp|P63244|RACK1_HUMAN Receptor of activated protein C kinase 1 OS=Homo sapiens OX=9606 GN=RACK1 PE=1 SV=3	Receptor of activated protein C kinase 1	RACK1	Sus scrofa	2	6	6	6	6	6	6	6	6	6	6	6	6	6	6	6	6	6	6	6	6	6	37.9	37.9	37.9	35.076	317	317;317	1949-03-01	7	7	7	6	7	7	0	46.68	By MS/MS	By MS/MS	By MS/MS
P35243	sp|P35243|RECO_HUMAN	sp|P35243|RECO_HUMAN	3	3	3	sp|P35243|RECO_HUMAN Recoverin OS=Homo sapiens OX=9606 GN=RCVRN PE=1 SV=2	Recoverin	RCVRN	Homo sapiens	1	3	3	3	3	3	3	3	3	3	3	3	3	3	3	3	3	3	3	3	3	3	2022-05-18	2022-05-18	2022-05-18	23.13	200	200	1944-03-01	5	6	6	5	5	5	0	260.03	By MS/MS	By MS/MS	By MS/MS
Q9NQG5	sp|Q9NQG5|RPR1B_HUMAN;sp|Q96P16|RPR1A_HUMAN	sp|Q9NQG5|RPR1B_HUMAN	3;1	3;1	3;1	sp|Q9NQG5|RPR1B_HUMAN Regulation of nuclear pre-mRNA domain-containing protein 1B OS=Homo sapiens OX=9606 GN=RPRD1B PE=1 SV=1	Regulation of nuclear pre-mRNA domain-containing protein 1B	RPRD1B	Homo sapiens	2	3	3	3	3	3	3	2	2	2	3	3	3	2	2	2	3	3	3	2	2	2	2022-04-14	2022-04-14	2022-04-14	36.899	326	326;312	2022-02-03	3	3	3	2	2	2	0	19.893	By MS/MS	By MS/MS	By MS/MS
Q96DB5	sp|Q96DB5|RMD1_HUMAN	sp|Q96DB5|RMD1_HUMAN	1	1	1	sp|Q96DB5|RMD1_HUMAN Regulator of microtubule dynamics protein 1 OS=Homo sapiens OX=9606 GN=RMDN1 PE=1 SV=1	Regulator of microtubule dynamics protein 1	RMDN1	Homo sapiens	1	1	1	1	1	1	1	1	1	1	1	1	1	1	1	1	1	1	1	1	1	1	2022-01-06	2022-01-06	2022-01-06	35.808	314	314	2022-05-03	1	1	1	1	1	1	0.0025094	98.687	By MS/MS	By matching	By MS/MS
Q15293	sp|Q15293|RCN1_HUMAN	sp|Q15293|RCN1_HUMAN	4	4	4	sp|Q15293|RCN1_HUMAN Reticulocalbin-1 OS=Homo sapiens OX=9606 GN=RCN1 PE=1 SV=1	Reticulocalbin-1	RCN1	Homo sapiens	1	4	4	4	3	4	3	3	3	3	3	4	3	3	3	3	3	4	3	3	3	3	16	16	16	38.89	331	331	2027-03-01	4	5	3	4	3	3	0	93.275	By MS/MS	By MS/MS	By MS/MS
Q14257	sp|Q14257|RCN2_HUMAN	sp|Q14257|RCN2_HUMAN	1	1	1	sp|Q14257|RCN2_HUMAN Reticulocalbin-2 OS=Homo sapiens OX=9606 GN=RCN2 PE=1 SV=1	Reticulocalbin-2	RCN2	Homo sapiens	1	1	1	1	1	1	1	1	1	1	1	1	1	1	1	1	1	1	1	1	1	1	6	6	6	36.876	317	317	2022-05-03	1	1	1	1	1	1	0	28.23	By MS/MS	By MS/MS	By MS/MS
Q16799	sp|Q16799|RTN1_HUMAN	sp|Q16799|RTN1_HUMAN	2	2	2	sp|Q16799|RTN1_HUMAN Reticulon-1 OS=Homo sapiens OX=9606 GN=RTN1 PE=1 SV=1	Reticulon-1	RTN1	Homo sapiens	1	2	2	2	1	1	2	2	2	2	1	1	2	2	2	2	1	1	2	2	2	2	2022-07-02	2022-07-02	2022-07-02	83.617	776	776	2022-09-03	1	1	2	2	2	2	0	12.225	By MS/MS	By MS/MS	By MS/MS
O95197	sp|O95197|RTN3_HUMAN	sp|O95197|RTN3_HUMAN	1	1	1	sp|O95197|RTN3_HUMAN Reticulon-3 OS=Homo sapiens OX=9606 GN=RTN3 PE=1 SV=2	Reticulon-3	RTN3	Homo sapiens	1	1	1	1	1	1	1	1	1	1	1	1	1	1	1	1	1	1	1	1	1	1	2022-01-01	2022-01-01	2022-01-01	112.61	1032	1032	2022-05-03	1	1	1	1	1	1	0	14.799	By MS/MS	By MS/MS	By MS/MS
Q9NQC3	sp|Q9NQC3|RTN4_HUMAN	sp|Q9NQC3|RTN4_HUMAN	6	6	6	sp|Q9NQC3|RTN4_HUMAN Reticulon-4 OS=Homo sapiens OX=9606 GN=RTN4 PE=1 SV=2	Reticulon-4	RTN4	Homo sapiens	1	6	6	6	5	5	5	4	5	4	5	5	5	4	5	4	5	5	5	4	5	4	2022-05-06	2022-05-06	2022-05-06	129.93	1192	1192	1942-03-01	8	9	8	8	8	7	0	207.02	By MS/MS	By MS/MS	By MS/MS
P00352	sp|P00352|AL1A1_HUMAN	sp|P00352|AL1A1_HUMAN	1	1	1	sp|P00352|AL1A1_HUMAN Retinal dehydrogenase 1 OS=Homo sapiens OX=9606 GN=ALDH1A1 PE=1 SV=2	Retinal dehydrogenase 1	ALDH1A1	Homo sapiens	1	1	1	1	1	1	1	1	1	1	1	1	1	1	1	1	1	1	1	1	1	1	2022-02-06	2022-02-06	2022-02-06	54.861	501	501	2022-05-03	2	2	2	2	2	2	0.0024845	92.771	By MS/MS	By MS/MS	By MS/MS
O43924	sp|O43924|PDE6D_HUMAN	sp|O43924|PDE6D_HUMAN	2	2	2	sp|O43924|PDE6D_HUMAN Retinal rod rhodopsin-sensitive cGMP 3,5-cyclic phosphodiesterase subunit delta OS=Homo sapiens OX=9606 GN=PDE6D PE=1 SV=1	Retinal rod rhodopsin-sensitive cGMP 3,5-cyclic phosphodiesterase subunit delta	PDE6D	Homo sapiens	1	2	2	2	1	2	2	2	2	2	1	2	2	2	2	2	1	2	2	2	2	2	2022-07-20	2022-07-20	2022-07-20	17.42	150	150	1973-03-01	1	2	2	2	2	2	0	2022-02-17	By MS/MS	By MS/MS	By MS/MS
P12271	sp|P12271|RLBP1_HUMAN	sp|P12271|RLBP1_HUMAN	4	4	4	sp|P12271|RLBP1_HUMAN Retinaldehyde-binding protein 1 OS=Homo sapiens OX=9606 GN=RLBP1 PE=1 SV=2	Retinaldehyde-binding protein 1	RLBP1	Homo sapiens	1	4	4	4	4	4	4	4	4	4	4	4	4	4	4	4	4	4	4	4	4	4	2022-04-17	2022-04-17	2022-04-17	36.474	317	317	1945-03-01	8	8	9	9	8	7	0	243.58	By MS/MS	By MS/MS	By MS/MS
Q16518	sp|Q16518|RPE65_HUMAN	sp|Q16518|RPE65_HUMAN	10	10	10	sp|Q16518|RPE65_HUMAN Retinoid isomerohydrolase OS=Homo sapiens OX=9606 GN=RPE65 PE=1 SV=3	Retinoid isomerohydrolase	RPE65	Homo sapiens	1	10	10	10	0	10	6	2	6	5	0	10	6	2	6	5	0	10	6	2	6	5	2022-08-27	2022-08-27	2022-08-27	60.947	533	533	1963-03-01		12	8	2	7	6	0	75.663		By MS/MS	By MS/MS
Q8IZV5	sp|Q8IZV5|RDH10_HUMAN	sp|Q8IZV5|RDH10_HUMAN	2	2	2	sp|Q8IZV5|RDH10_HUMAN Retinol dehydrogenase 10 OS=Homo sapiens OX=9606 GN=RDH10 PE=1 SV=1	Retinol dehydrogenase 10	RDH10	Homo sapiens	1	2	2	2	2	1	1	2	2	2	2	1	1	2	2	2	2	1	1	2	2	2	2022-01-14	2022-01-14	2022-01-14	38.087	341	341	1991-03-01	2	1	1	2	2	3	0	17.242	By MS/MS	By matching	By MS/MS
Q92781	sp|Q92781|RDH5_HUMAN	sp|Q92781|RDH5_HUMAN	2	2	2	sp|Q92781|RDH5_HUMAN Retinol dehydrogenase 5 OS=Homo sapiens OX=9606 GN=RDH5 PE=1 SV=1	Retinol dehydrogenase 5	RDH5	Homo sapiens	1	2	2	2	0	2	1	0	1	0	0	2	1	0	1	0	0	2	1	0	1	0	2022-09-07	2022-09-07	2022-09-07	34.978	318	318	3		2	1		1		0	14.254		By MS/MS	By matching
O15537	sp|O15537|XLRS1_HUMAN	sp|O15537|XLRS1_HUMAN	6	6	6	sp|O15537|XLRS1_HUMAN Retinoschisin OS=Homo sapiens OX=9606 GN=RS1 PE=1 SV=2	Retinoschisin	RS1	Homo sapiens	1	6	6	6	6	6	6	6	6	5	6	6	6	6	6	5	6	6	6	6	6	5	2022-08-30	2022-08-30	2022-08-30	25.592	224	224	1943-03-01	6	6	6	6	6	5	0	273.2	By MS/MS	By MS/MS	By MS/MS
P52565	sp|P52565|GDIR1_HUMAN	sp|P52565|GDIR1_HUMAN	2	2	2	sp|P52565|GDIR1_HUMAN Rho GDP-dissociation inhibitor 1 OS=Homo sapiens OX=9606 GN=ARHGDIA PE=1 SV=3	Rho GDP-dissociation inhibitor 1	ARHGDIA	Homo sapiens	1	2	2	2	1	2	2	2	2	2	1	2	2	2	2	2	1	2	2	2	2	2	2022-05-23	2022-05-23	2022-05-23	23.207	204	204	1983-03-01	1	2	2	2	3	2	0	19.078	By matching	By MS/MS	By MS/MS
O18766	sp|O18766|OPSD_PIG;sp|P08100|OPSD_HUMAN	sp|O18766|OPSD_PIG	5;2	5;2	5;2	sp|O18766|OPSD_PIG Rhodopsin OS=Sus scrofa OX=9823 GN=RHO PE=1 SV=1	Rhodopsin	RHO	Sus scrofa	2	5	5	5	5	5	5	5	5	5	5	5	5	5	5	5	5	5	5	5	5	5	2022-01-18	2022-01-18	2022-01-18	39.026	348	348;348	1946-03-01	20	25	24	24	20	21	0	323.31	By MS/MS	By MS/MS	By MS/MS
Q8WP15	sp|Q8WP15|GRK7_PIG;sp|Q8WTQ7|GRK7_HUMAN	sp|Q8WP15|GRK7_PIG	3;1	3;1	3;1	sp|Q8WP15|GRK7_PIG Rhodopsin kinase GRK7 OS=Sus scrofa OX=9823 GN=GRK7 PE=1 SV=1	Rhodopsin kinase GRK7	GRK7	Sus scrofa	2	3	3	3	1	2	2	1	3	3	1	2	2	1	3	3	1	2	2	1	3	3	2022-02-09	2022-02-09	2022-02-09	62.299	553	553;553	4	1	2	2	1	3	3	0	17.876	By matching	By MS/MS	By MS/MS
P10775	sp|P10775|RINI_PIG	sp|P10775|RINI_PIG	9	9	9	sp|P10775|RINI_PIG Ribonuclease inhibitor OS=Sus scrofa OX=9823 GN=RNH1 PE=1 SV=1	Ribonuclease inhibitor	RNH1	Sus scrofa	1	9	9	9	7	7	7	9	8	7	7	7	7	9	8	7	7	7	7	9	8	7	36.4	36.4	36.4	49.023	456	456	1958-03-01	8	8	8	10	10	8	0	73.909	By MS/MS	By MS/MS	By MS/MS
P60891	sp|P60891|PRPS1_HUMAN;sp|P11908|PRPS2_HUMAN;sp|P21108|PRPS3_HUMAN	sp|P60891|PRPS1_HUMAN	5;1;1	5;1;1	5;1;1	sp|P60891|PRPS1_HUMAN Ribose-phosphate pyrophosphokinase 1 OS=Homo sapiens OX=9606 GN=PRPS1 PE=1 SV=2	Ribose-phosphate pyrophosphokinase 1	PRPS1	Homo sapiens	3	5	5	5	4	5	4	4	4	5	4	5	4	4	4	5	4	5	4	4	4	5	2022-08-25	2022-08-25	2022-08-25	34.834	318	318;318;318	2022-04-03	5	6	5	5	4	5	0	46.385	By MS/MS	By MS/MS	By MS/MS
Q96AT9	sp|Q96AT9|RPE_HUMAN	sp|Q96AT9|RPE_HUMAN	1	1	1	sp|Q96AT9|RPE_HUMAN Ribulose-phosphate 3-epimerase OS=Homo sapiens OX=9606 GN=RPE PE=1 SV=1	Ribulose-phosphate 3-epimerase	RPE	Homo sapiens	1	1	1	1	1	1	1	1	1	1	1	1	1	1	1	1	1	1	1	1	1	1	2022-03-08	2022-03-08	2022-03-08	24.927	228	228	2022-05-03	1	1	1	1	1	1	0.002439	85.118	By MS/MS	By MS/MS	By matching
Q96E39	sp|Q96E39|RMXL1_HUMAN;sp|P38159|RBMX_HUMAN;sp|O75526|RMXL2_HUMAN;sp|Q8N7X1|RMXL3_HUMAN	sp|Q96E39|RMXL1_HUMAN;sp|P38159|RBMX_HUMAN;sp|O75526|RMXL2_HUMAN;sp|Q8N7X1|RMXL3_HUMAN	2;2;1;1	2;2;1;1	2;2;1;1	sp|Q96E39|RMXL1_HUMAN RNA binding motif protein, X-linked-like-1 OS=Homo sapiens OX=9606 GN=RBMXL1 PE=1 SV=1;sp|P38159|RBMX_HUMAN RNA-binding motif protein, X chromosome OS=Homo sapiens OX=9606 GN=RBMX PE=1 SV=3;sp|O75526|RMXL2_HUMAN RNA-binding motif prot	RNA binding motif protein, X-linked-like-1	RBMXL1	Homo sapiens	4	2	2	2	2	2	2	2	2	2	2	2	2	2	2	2	2	2	2	2	2	2	2022-09-06	2022-09-06	2022-09-06	42.141	390	390;391;392;1067	2022-05-03	2	2	2	2	2	2	0	17.033	By MS/MS	By MS/MS	By MS/MS
Q9Y224	sp|Q9Y224|RTRAF_HUMAN	sp|Q9Y224|RTRAF_HUMAN	4	4	4	sp|Q9Y224|RTRAF_HUMAN RNA transcription, translation and transport factor protein OS=Homo sapiens OX=9606 GN=RTRAF PE=1 SV=1	RNA transcription, translation and transport factor protein	RTRAF	Homo sapiens	1	4	4	4	4	4	4	4	4	4	4	4	4	4	4	4	4	4	4	4	4	4	2022-04-25	2022-04-25	2022-04-25	28.068	244	244	2022-05-03	4	4	4	4	4	4	0	38.349	By MS/MS	By MS/MS	By MS/MS
Q14498	sp|Q14498|RBM39_HUMAN	sp|Q14498|RBM39_HUMAN	3	3	3	sp|Q14498|RBM39_HUMAN RNA-binding protein 39 OS=Homo sapiens OX=9606 GN=RBM39 PE=1 SV=2	RNA-binding protein 39	RBM39	Homo sapiens	1	3	3	3	3	3	2	2	2	2	3	3	2	2	2	2	3	3	2	2	2	2	2022-01-09	2022-01-09	2022-01-09	59.379	530	530	2021-03-01	3	3	2	2	2	2	0	20.115	By MS/MS	By MS/MS	By MS/MS
Q01844	sp|Q01844|EWS_HUMAN	sp|Q01844|EWS_HUMAN	3	3	3	sp|Q01844|EWS_HUMAN RNA-binding protein EWS OS=Homo sapiens OX=9606 GN=EWSR1 PE=1 SV=1	RNA-binding protein EWS	EWSR1	Homo sapiens	1	3	3	3	3	3	3	3	3	3	3	3	3	3	3	3	3	3	3	3	3	3	2022-07-08	2022-07-08	2022-07-08	68.477	656	656	2022-05-03	3	3	3	3	3	3	0	35.563	By MS/MS	By MS/MS	By MS/MS
P35637	sp|P35637|FUS_HUMAN;sp|Q92804|RBP56_HUMAN	sp|P35637|FUS_HUMAN;sp|Q92804|RBP56_HUMAN	2;1	2;1	2;1	sp|P35637|FUS_HUMAN RNA-binding protein FUS OS=Homo sapiens OX=9606 GN=FUS PE=1 SV=1;sp|Q92804|RBP56_HUMAN TATA-binding protein-associated factor 2N OS=Homo sapiens OX=9606 GN=TAF15 PE=1 SV=1	RNA-binding protein FUS	FUS	Homo sapiens	2	2	2	2	2	2	2	2	2	2	2	2	2	2	2	2	2	2	2	2	2	2	3	3	3	53.425	526	526;592	2022-05-03	2	2	2	2	2	2	0	14.387	By MS/MS	By MS/MS	By MS/MS
O43347	sp|O43347|MSI1H_HUMAN	sp|O43347|MSI1H_HUMAN	3	3	3	sp|O43347|MSI1H_HUMAN RNA-binding protein Musashi homolog 1 OS=Homo sapiens OX=9606 GN=MSI1 PE=1 SV=1	RNA-binding protein Musashi homolog 1	MSI1	Homo sapiens	1	3	3	3	3	2	3	3	3	2	3	2	3	3	3	2	3	2	3	3	3	2	2022-07-12	2022-07-12	2022-07-12	39.124	362	362	1941-03-01	3	2	4	3	3	2	0	21.701	By MS/MS	By MS/MS	By MS/MS
Q96DH6	sp|Q96DH6|MSI2H_HUMAN	sp|Q96DH6|MSI2H_HUMAN	2	2	2	sp|Q96DH6|MSI2H_HUMAN RNA-binding protein Musashi homolog 2 OS=Homo sapiens OX=9606 GN=MSI2 PE=1 SV=1	RNA-binding protein Musashi homolog 2	MSI2	Homo sapiens	1	2	2	2	2	2	2	2	2	2	2	2	2	2	2	2	2	2	2	2	2	2	2022-01-09	2022-01-09	2022-01-09	35.196	328	328	2022-05-03	2	2	2	2	2	2	0	20.129	By MS/MS	By MS/MS	By MS/MS
Q9Y3I0	sp|Q9Y3I0|RTCB_HUMAN;sp|Q19PY3|RTCB_PIG	sp|Q9Y3I0|RTCB_HUMAN;sp|Q19PY3|RTCB_PIG	6;6	6;6	6;6	sp|Q9Y3I0|RTCB_HUMAN RNA-splicing ligase RtcB homolog OS=Homo sapiens OX=9606 GN=RTCB PE=1 SV=1;sp|Q19PY3|RTCB_PIG RNA-splicing ligase RtcB homolog OS=Sus scrofa OX=9823 GN=RTCB PE=2 SV=1	RNA-splicing ligase RtcB homolog	RTCB	Homo sapiens	2	6	6	6	5	6	6	6	6	5	5	6	6	6	6	5	5	6	6	6	6	5	2022-08-18	2022-08-18	2022-08-18	55.21	505	505;505	2022-05-03	5	6	6	6	6	5	0	61.008	By MS/MS	By MS/MS	By MS/MS
Q03395	sp|Q03395|ROM1_HUMAN	sp|Q03395|ROM1_HUMAN	1	1	1	sp|Q03395|ROM1_HUMAN Rod outer segment membrane protein 1 OS=Homo sapiens OX=9606 GN=ROM1 PE=1 SV=2	Rod outer segment membrane protein 1	ROM1	Homo sapiens	1	1	1	1	1	1	1	1	1	1	1	1	1	1	1	1	1	1	1	1	1	1	2022-07-03	2022-07-03	2022-07-03	37.205	351	351	2022-05-03	1	1	1	1	1	1	0.0023585	78.269	By MS/MS	By MS/MS	By MS/MS
Q9Y265	sp|Q9Y265|RUVB1_HUMAN	sp|Q9Y265|RUVB1_HUMAN	3	3	3	sp|Q9Y265|RUVB1_HUMAN RuvB-like 1 OS=Homo sapiens OX=9606 GN=RUVBL1 PE=1 SV=1	RuvB-like 1	RUVBL1	Homo sapiens	1	3	3	3	3	3	3	3	3	3	3	3	3	3	3	3	3	3	3	3	3	3	9	9	9	50.227	456	456	2022-05-03	3	3	3	3	3	3	0	18.518	By MS/MS	By MS/MS	By MS/MS
Q9Y230	sp|Q9Y230|RUVB2_HUMAN	sp|Q9Y230|RUVB2_HUMAN	3	3	3	sp|Q9Y230|RUVB2_HUMAN RuvB-like 2 OS=Homo sapiens OX=9606 GN=RUVBL2 PE=1 SV=3	RuvB-like 2	RUVBL2	Homo sapiens	1	3	3	3	3	3	3	3	3	3	3	3	3	3	3	3	3	3	3	3	3	3	2022-02-08	2022-02-08	2022-02-08	51.156	463	463	2022-05-03	3	3	3	3	3	3	0	18.415	By MS/MS	By MS/MS	By MS/MS
P31153	sp|P31153|METK2_HUMAN	sp|P31153|METK2_HUMAN	3	3	3	sp|P31153|METK2_HUMAN S-adenosylmethionine synthase isoform type-2 OS=Homo sapiens OX=9606 GN=MAT2A PE=1 SV=1	S-adenosylmethionine synthase isoform type-2	MAT2A	Homo sapiens	1	3	3	3	3	3	3	3	1	2	3	3	3	3	1	2	3	3	3	3	1	2	2022-09-12	2022-09-12	2022-09-12	43.66	395	395	2013-03-01	3	3	3	3	1	2	0	21.537	By MS/MS	By MS/MS	By MS/MS
P82979	sp|P82979|SARNP_HUMAN	sp|P82979|SARNP_HUMAN	1	1	1	sp|P82979|SARNP_HUMAN SAP domain-containing ribonucleoprotein OS=Homo sapiens OX=9606 GN=SARNP PE=1 SV=3	SAP domain-containing ribonucleoprotein	SARNP	Homo sapiens	1	1	1	1	1	1	1	1	1	1	1	1	1	1	1	1	1	1	1	1	1	1	9	9	9	23.671	210	210	2022-05-03	1	1	1	1	1	1	0.003304	69.464	By matching	By MS/MS	By matching
P16615	sp|P16615|AT2A2_HUMAN;sp|P11607|AT2A2_PIG;sp|Q93084|AT2A3_HUMAN;sp|O77696|AT2A3_PIG;sp|O14983|AT2A1_HUMAN	sp|P16615|AT2A2_HUMAN;sp|P11607|AT2A2_PIG	5;5;1;1;1	5;5;1;1;1	5;5;1;1;1	sp|P16615|AT2A2_HUMAN Sarcoplasmic/endoplasmic reticulum calcium ATPase 2 OS=Homo sapiens OX=9606 GN=ATP2A2 PE=1 SV=1;sp|P11607|AT2A2_PIG Sarcoplasmic/endoplasmic reticulum calcium ATPase 2 OS=Sus scrofa OX=9823 GN=ATP2A2 PE=1 SV=1	Sarcoplasmic/endoplasmic reticulum calcium ATPase 2	ATP2A2	Homo sapiens	5	5	5	5	5	5	5	5	5	5	5	5	5	5	5	5	5	5	5	5	5	5	2022-08-07	2022-08-07	2022-08-07	114.76	1042	1042;1042;999;999;1001	2022-05-03	5	5	5	5	5	5	0	44.376	By MS/MS	By MS/MS	By MS/MS
P10523	sp|P10523|ARRS_HUMAN	sp|P10523|ARRS_HUMAN	4	2	2	sp|P10523|ARRS_HUMAN S-arrestin OS=Homo sapiens OX=9606 GN=SAG PE=1 SV=3	S-arrestin	SAG	Homo sapiens	1	4	2	2	4	4	4	4	4	4	2	2	2	2	2	2	2	2	2	2	2	2	2022-04-08	2022-07-04	2022-07-04	45.119	405	405	2022-08-03	2	2	2	3	3	3	0	11.786	By MS/MS	By MS/MS	By MS/MS
P79260	sp|P79260|ARRS_PIG	sp|P79260|ARRS_PIG	21	21	19	sp|P79260|ARRS_PIG S-arrestin OS=Sus scrofa OX=9823 GN=SAG PE=2 SV=1	S-arrestin	SAG	Sus scrofa	1	21	21	19	21	21	21	20	20	21	21	21	21	20	20	21	19	19	19	18	18	19	72.8	72.8	69.1	45.102	405	405	1953-03-01	69	79	77	82	75	75	0	323.31	By MS/MS	By MS/MS	By MS/MS
Q12765	sp|Q12765|SCRN1_HUMAN	sp|Q12765|SCRN1_HUMAN	1	1	1	sp|Q12765|SCRN1_HUMAN Secernin-1 OS=Homo sapiens OX=9606 GN=SCRN1 PE=1 SV=2	Secernin-1	SCRN1	Homo sapiens	1	1	1	1	0	0	0	0	1	1	0	0	0	0	1	1	0	0	0	0	1	1	2022-09-03	2022-09-03	2022-09-03	46.382	414	414	2022-05-05					1	1	0.0033333	70.454
Q06A97	sp|Q06A97|SEGN_PIG;sp|O76038|SEGN_HUMAN	sp|Q06A97|SEGN_PIG;sp|O76038|SEGN_HUMAN	2;1	2;1	2;1	sp|Q06A97|SEGN_PIG Secretagogin OS=Sus scrofa OX=9823 GN=SCGN PE=2 SV=1;sp|O76038|SEGN_HUMAN Secretagogin OS=Homo sapiens OX=9606 GN=SCGN PE=1 SV=2	Secretagogin	SCGN	Sus scrofa	2	2	2	2	1	1	1	1	1	2	1	1	1	1	1	2	1	1	1	1	1	2	2022-01-10	2022-01-10	2022-01-10	31.965	276	276;276	1986-03-01	1	1	1	1	1	2	0	2022-02-12	By MS/MS	By MS/MS	By MS/MS
O77735	sp|O77735|SCAM1_PIG;sp|O15126|SCAM1_HUMAN	sp|O77735|SCAM1_PIG	3;1	3;1	3;1	sp|O77735|SCAM1_PIG Secretory carrier-associated membrane protein 1 OS=Sus scrofa OX=9823 GN=SCAMP1 PE=2 SV=1	Secretory carrier-associated membrane protein 1	SCAMP1	Sus scrofa	2	3	3	3	3	3	3	3	2	2	3	3	3	3	2	2	3	3	3	3	2	2	2022-03-18	2022-03-18	2022-03-18	37.919	338	338;338	2025-03-01	3	3	3	3	2	2	0	21.723	By MS/MS	By MS/MS	By MS/MS
A1Z623	sp|A1Z623|SEP15_PIG;sp|O60613|SEP15_HUMAN	sp|A1Z623|SEP15_PIG;sp|O60613|SEP15_HUMAN	2;2	2;2	2;2	sp|A1Z623|SEP15_PIG Selenoprotein F OS=Sus scrofa OX=9823 GN=SELENOF PE=2 SV=2;sp|O60613|SEP15_HUMAN Selenoprotein F OS=Homo sapiens OX=9606 GN=SELENOF PE=1 SV=4	Selenoprotein F	SELENOF	Sus scrofa	2	2	2	2	1	1	2	2	2	1	1	1	2	2	2	1	1	1	2	2	2	1	2022-03-17	2022-03-17	2022-03-17	17.843	162	162;165	1967-03-01	1	1	2	2	2	1	0	13.159	By matching	By MS/MS	By MS/MS
P35270	sp|P35270|SPRE_HUMAN	sp|P35270|SPRE_HUMAN	1	1	1	sp|P35270|SPRE_HUMAN Sepiapterin reductase OS=Homo sapiens OX=9606 GN=SPR PE=1 SV=1	Sepiapterin reductase	SPR	Homo sapiens	1	1	1	1	0	1	1	1	1	1	0	1	1	1	1	1	0	1	1	1	1	1	2022-03-07	2022-03-07	2022-03-07	28.048	261	261	4		1	1	1	1	1	0	47.759		By MS/MS	By matching
Q9NVA2	sp|Q9NVA2|SEP11_HUMAN;REV__sp|Q9NS37|ZHANG_HUMAN;sp|Q9P0V9|SEP10_HUMAN	sp|Q9NVA2|SEP11_HUMAN	4;1;1	4;1;1	3;1;0	sp|Q9NVA2|SEP11_HUMAN Septin-11 OS=Homo sapiens OX=9606 GN=SEPTIN11 PE=1 SV=3	Septin-11	SEPTIN11	Homo sapiens	3	4	4	3	3	4	4	4	4	2	3	4	4	4	4	2	2	3	3	3	3	2	2022-08-13	2022-08-13	2022-03-09	49.398	429	429;354;454	1938-03-01	3	4	4	4	4	2	0	38.322	By MS/MS	By MS/MS	By MS/MS
Q15019	sp|Q15019|SEPT2_HUMAN	sp|Q15019|SEPT2_HUMAN	3	3	3	sp|Q15019|SEPT2_HUMAN Septin-2 OS=Homo sapiens OX=9606 GN=SEPTIN2 PE=1 SV=1	Septin-2	SEPTIN2	Homo sapiens	1	3	3	3	3	3	3	3	3	3	3	3	3	3	3	3	3	3	3	3	3	3	2022-05-12	2022-05-12	2022-05-12	41.487	361	361	1939-03-01	4	4	4	4	4	3	0	26.065	By MS/MS	By MS/MS	By MS/MS
Q14141	sp|Q14141|SEPT6_HUMAN	sp|Q14141|SEPT6_HUMAN	1	1	1	sp|Q14141|SEPT6_HUMAN Septin-6 OS=Homo sapiens OX=9606 GN=SEPTIN6 PE=1 SV=4	Septin-6	SEPTIN6	Homo sapiens	1	1	1	1	1	1	1	0	1	1	1	1	1	0	1	1	1	1	1	0	1	1	2022-06-04	2022-06-04	2022-06-04	49.716	434	434	2022-04-03	1	1	1		1	1	0	111.02	By MS/MS	By MS/MS	By MS/MS
Q16181	sp|Q16181|SEPT7_HUMAN	sp|Q16181|SEPT7_HUMAN	8	8	8	sp|Q16181|SEPT7_HUMAN Septin-7 OS=Homo sapiens OX=9606 GN=SEPTIN7 PE=1 SV=2	Septin-7	SEPTIN7	Homo sapiens	1	8	8	8	7	8	7	7	6	5	7	8	7	7	6	5	7	8	7	7	6	5	2022-04-28	2022-04-28	2022-04-28	50.679	437	437	2022-03-03	7	8	7	7	6	5	0	121.59	By MS/MS	By MS/MS	By MS/MS
Q92599	sp|Q92599|SEPT8_HUMAN	sp|Q92599|SEPT8_HUMAN	4	3	3	sp|Q92599|SEPT8_HUMAN Septin-8 OS=Homo sapiens OX=9606 GN=SEPTIN8 PE=1 SV=4	Septin-8	SEPTIN8	Homo sapiens	1	4	3	3	2	3	3	3	3	1	1	2	2	2	2	1	1	2	2	2	2	1	2022-04-16	2022-04-12	2022-04-12	55.756	483	483	1933-03-01	1	3	3	2	2	1	0	51.922	By MS/MS	By MS/MS	By MS/MS
Q9UHD8	sp|Q9UHD8|SEPT9_HUMAN	sp|Q9UHD8|SEPT9_HUMAN	2	2	2	sp|Q9UHD8|SEPT9_HUMAN Septin-9 OS=Homo sapiens OX=9606 GN=SEPTIN9 PE=1 SV=2	Septin-9	SEPTIN9	Homo sapiens	1	2	2	2	2	1	1	2	2	2	2	1	1	2	2	2	2	1	1	2	2	2	2022-04-04	2022-04-04	2022-04-04	65.401	586	586	2022-07-03	2	1	1	2	2	2	0	13.054	By MS/MS	By MS/MS	By MS/MS
Q3YLA6	sp|Q3YLA6|SRSF1_PIG;sp|Q07955|SRSF1_HUMAN	sp|Q3YLA6|SRSF1_PIG;sp|Q07955|SRSF1_HUMAN	2;2	2;2	2;2	sp|Q3YLA6|SRSF1_PIG Serine/arginine-rich splicing factor 1 OS=Sus scrofa OX=9823 GN=SRSF1 PE=2 SV=3;sp|Q07955|SRSF1_HUMAN Serine/arginine-rich splicing factor 1 OS=Homo sapiens OX=9606 GN=SRSF1 PE=1 SV=2	Serine/arginine-rich splicing factor 1	SRSF1	Sus scrofa	2	2	2	2	2	2	2	2	2	2	2	2	2	2	2	2	2	2	2	2	2	2	2022-05-08	2022-05-08	2022-05-08	27.744	248	248;248	1956-03-01	2	2	4	3	3	2	0	2022-12-13	By MS/MS	By MS/MS	By MS/MS
Q05519	sp|Q05519|SRS11_HUMAN	sp|Q05519|SRS11_HUMAN	1	1	1	sp|Q05519|SRS11_HUMAN Serine/arginine-rich splicing factor 11 OS=Homo sapiens OX=9606 GN=SRSF11 PE=1 SV=1	Serine/arginine-rich splicing factor 11	SRSF11	Homo sapiens	1	1	1	1	1	0	0	1	1	1	1	0	0	1	1	1	1	0	0	1	1	1	2022-03-04	2022-03-04	2022-03-04	53.542	484	484	4	1			1	1	1	0.0053362	66.557	By MS/MS
Q06A98	sp|Q06A98|SRSF2_PIG;sp|Q01130|SRSF2_HUMAN	sp|Q06A98|SRSF2_PIG;sp|Q01130|SRSF2_HUMAN	2;2	2;2	2;2	sp|Q06A98|SRSF2_PIG Serine/arginine-rich splicing factor 2 OS=Sus scrofa OX=9823 GN=SRSF2 PE=2 SV=1;sp|Q01130|SRSF2_HUMAN Serine/arginine-rich splicing factor 2 OS=Homo sapiens OX=9606 GN=SRSF2 PE=1 SV=4	Serine/arginine-rich splicing factor 2	SRSF2	Sus scrofa	2	2	2	2	2	2	2	2	2	2	2	2	2	2	2	2	2	2	2	2	2	2	2022-09-14	2022-09-14	2022-09-14	25.448	221	221;221	2022-05-03	2	2	2	2	2	2	0	16.487	By MS/MS	By MS/MS	By MS/MS
Q16629	sp|Q16629|SRSF7_HUMAN	sp|Q16629|SRSF7_HUMAN	2	2	1	sp|Q16629|SRSF7_HUMAN Serine/arginine-rich splicing factor 7 OS=Homo sapiens OX=9606 GN=SRSF7 PE=1 SV=1	Serine/arginine-rich splicing factor 7	SRSF7	Homo sapiens	1	2	2	1	2	2	1	2	2	2	2	2	1	2	2	2	1	1	0	1	1	1	2022-02-09	2022-02-09	2022-04-03	27.366	238	238	1958-03-01	2	2	1	3	2	2	0	24.846	By MS/MS	By MS/MS	By MS/MS
Q9BYP7	sp|Q9BYP7|WNK3_HUMAN	sp|Q9BYP7|WNK3_HUMAN	1	1	1	sp|Q9BYP7|WNK3_HUMAN Serine/threonine-protein kinase WNK3 OS=Homo sapiens OX=9606 GN=WNK3 PE=1 SV=3	Serine/threonine-protein kinase WNK3	WNK3	Homo sapiens	1	1	1	1	1	1	1	1	1	1	1	1	1	1	1	1	1	1	1	1	1	1	0.8	0.8	0.8	198.41	1800	1800	2022-05-03	1	1	1	1	1	1	0.0023447	77.609	By MS/MS	By MS/MS	By MS/MS
P54612	sp|P54612|2AAA_PIG;sp|P30153|2AAA_HUMAN;sp|P30154|2AAB_HUMAN;sp|P54613|2AAB_PIG	sp|P54612|2AAA_PIG;sp|P30153|2AAA_HUMAN	6;6;2;2	6;6;2;2	6;6;2;2	sp|P54612|2AAA_PIG Serine/threonine-protein phosphatase 2A 65 kDa regulatory subunit A alpha isoform OS=Sus scrofa OX=9823 GN=PPP2R1A PE=2 SV=2;sp|P30153|2AAA_HUMAN Serine/threonine-protein phosphatase 2A 65 kDa regulatory subunit A alpha isoform OS=Homo s	Serine/threonine-protein phosphatase 2A 65 kDa regulatory subunit A alpha isoform	PPP2R1A	Sus scrofa	4	6	6	6	6	6	6	6	6	6	6	6	6	6	6	6	6	6	6	6	6	6	2022-03-15	2022-03-15	2022-03-15	65.322	589	589;589;601;602	2022-05-03	8	8	8	8	8	8	0	52.094	By MS/MS	By MS/MS	By MS/MS
Q15257	sp|Q15257|PTPA_HUMAN	sp|Q15257|PTPA_HUMAN	2	2	2	sp|Q15257|PTPA_HUMAN Serine/threonine-protein phosphatase 2A activator OS=Homo sapiens OX=9606 GN=PTPA PE=1 SV=3	Serine/threonine-protein phosphatase 2A activator	PTPA	Homo sapiens	1	2	2	2	2	2	2	1	1	1	2	2	2	1	1	1	2	2	2	1	1	1	2022-09-08	2022-09-08	2022-09-08	40.667	358	358	3	2	2	2	1	1	1	0.001292	2025-11-01	By MS/MS	By MS/MS	By MS/MS
P67776	sp|P67776|PP2AA_PIG;sp|P67775|PP2AA_HUMAN	sp|P67776|PP2AA_PIG;sp|P67775|PP2AA_HUMAN	8;8	8;8	1;1	sp|P67776|PP2AA_PIG Serine/threonine-protein phosphatase 2A catalytic subunit alpha isoform OS=Sus scrofa OX=9823 GN=PPP2CA PE=2 SV=1;sp|P67775|PP2AA_HUMAN Serine/threonine-protein phosphatase 2A catalytic subunit alpha isoform OS=Homo sapiens OX=9606 GN=P	Serine/threonine-protein phosphatase 2A catalytic subunit alpha isoform	PPP2CA	Sus scrofa	2	8	8	1	8	8	8	8	8	7	8	8	8	8	8	7	1	1	1	1	1	0	43.7	43.7	2022-02-04	35.594	309	309;309	1945-03-01	8	8	8	8	8	7	0	58.358	By MS/MS	By MS/MS	By MS/MS
P53041	sp|P53041|PPP5_HUMAN	sp|P53041|PPP5_HUMAN	1	1	1	sp|P53041|PPP5_HUMAN Serine/threonine-protein phosphatase 5 OS=Homo sapiens OX=9606 GN=PPP5C PE=1 SV=1	Serine/threonine-protein phosphatase 5	PPP5C	Homo sapiens	1	1	1	1	1	1	1	1	1	1	1	1	1	1	1	1	1	1	1	1	1	1	2022-04-02	2022-04-02	2022-04-02	56.878	499	499	2022-05-03	1	1	1	1	1	1	0.0053419	66.648	By MS/MS	By matching	By MS/MS
P36873	sp|P36873|PP1G_HUMAN;sp|P62136|PP1A_HUMAN	sp|P36873|PP1G_HUMAN;sp|P62136|PP1A_HUMAN	7;5	7;5	2;0	sp|P36873|PP1G_HUMAN Serine/threonine-protein phosphatase PP1-gamma catalytic subunit OS=Homo sapiens OX=9606 GN=PPP1CC PE=1 SV=1;sp|P62136|PP1A_HUMAN Serine/threonine-protein phosphatase PP1-alpha catalytic subunit OS=Homo sapiens OX=9606 GN=PPP1CA PE=1 S	Serine/threonine-protein phosphatase PP1-gamma catalytic subunit	PPP1CC	Homo sapiens	2	7	7	2	7	7	7	7	7	7	7	7	7	7	7	7	2	2	2	2	2	2	2022-05-28	2022-05-28	2022-04-07	36.983	323	323;330	2022-05-03	7	7	7	7	7	7	0	50.181	By MS/MS	By MS/MS	By MS/MS
P02787	sp|P02787|TRFE_HUMAN	sp|P02787|TRFE_HUMAN	19	19	18	sp|P02787|TRFE_HUMAN Serotransferrin OS=Homo sapiens OX=9606 GN=TF PE=1 SV=3	Serotransferrin	TF	Homo sapiens	1	19	19	18	17	18	18	18	15	16	17	18	18	18	15	16	16	17	17	17	15	15	36.2	36.2	34.2	77.063	698	698	2022-04-03	19	20	20	20	16	17	0	323.31	By MS/MS	By MS/MS	By MS/MS
P09571	sp|P09571|TRFE_PIG;sp|Q29545|ICA_PIG	sp|P09571|TRFE_PIG	5;1	4;1	4;1	sp|P09571|TRFE_PIG Serotransferrin OS=Sus scrofa OX=9823 GN=TF PE=1 SV=2	Serotransferrin	TF	Sus scrofa	2	5	4	4	4	4	2	5	2	1	3	3	1	4	2	0	3	3	1	4	2	0	2022-02-10	2022-02-08	2022-02-08	76.967	696	696;704	1992-02-01	3	3	1	4	2		0	34.354	By MS/MS	By MS/MS	By matching
P50454	sp|P50454|SERPH_HUMAN	sp|P50454|SERPH_HUMAN	7	7	7	sp|P50454|SERPH_HUMAN Serpin H1 OS=Homo sapiens OX=9606 GN=SERPINH1 PE=1 SV=2	Serpin H1	SERPINH1	Homo sapiens	1	7	7	7	7	7	7	6	6	6	7	7	7	6	6	6	7	7	7	6	6	6	2022-08-21	2022-08-21	2022-08-21	46.44	418	418	1938-03-01	7	7	7	6	6	6	0	132.31	By MS/MS	By MS/MS	By MS/MS
Q9BXP5	sp|Q9BXP5|SRRT_HUMAN	sp|Q9BXP5|SRRT_HUMAN	1	1	1	sp|Q9BXP5|SRRT_HUMAN Serrate RNA effector molecule homolog OS=Homo sapiens OX=9606 GN=SRRT PE=1 SV=1	Serrate RNA effector molecule homolog	SRRT	Homo sapiens	1	1	1	1	1	1	1	1	1	1	1	1	1	1	1	1	1	1	1	1	1	1	2022-02-02	2022-02-02	2022-02-02	100.67	876	876	2022-05-03	1	1	1	1	1	1	0.0074389	6.606	By MS/MS	By matching	By MS/MS
Q15165	sp|Q15165|PON2_HUMAN	sp|Q15165|PON2_HUMAN	2	2	2	sp|Q15165|PON2_HUMAN Serum paraoxonase/arylesterase 2 OS=Homo sapiens OX=9606 GN=PON2 PE=1 SV=4	Serum paraoxonase/arylesterase 2	PON2	Homo sapiens	1	2	2	2	2	2	2	2	2	2	2	2	2	2	2	2	2	2	2	2	2	2	2022-03-09	2022-03-09	2022-03-09	39.38	354	354	2021-03-01	3	3	2	2	2	2	0	12.264	By MS/MS	By MS/MS	By MS/MS
Q9GJT2	sp|Q9GJT2|ESTD_PIG;sp|P10768|ESTD_HUMAN	sp|Q9GJT2|ESTD_PIG	6;1	6;1	6;1	sp|Q9GJT2|ESTD_PIG S-formylglutathione hydrolase OS=Sus scrofa OX=9823 GN=ESD PE=2 SV=1	S-formylglutathione hydrolase	ESD	Sus scrofa	2	6	6	6	3	5	4	5	5	4	3	5	4	5	5	4	3	5	4	5	5	4	37.2	37.2	37.2	31.481	282	282;282	1962-03-01	3	5	4	5	5	4	0	39.801	By MS/MS	By MS/MS	By MS/MS
Q9H299	sp|Q9H299|SH3L3_HUMAN	sp|Q9H299|SH3L3_HUMAN	2	2	2	sp|Q9H299|SH3L3_HUMAN SH3 domain-binding glutamic acid-rich-like protein 3 OS=Homo sapiens OX=9606 GN=SH3BGRL3 PE=1 SV=1	SH3 domain-binding glutamic acid-rich-like protein 3	SH3BGRL3	Homo sapiens	1	2	2	2	2	2	2	2	2	2	2	2	2	2	2	2	2	2	2	2	2	2	2022-04-20	2022-04-20	2022-04-20	10.438	93	93	2022-05-03	2	2	2	2	2	2	0	25.893	By MS/MS	By MS/MS	By MS/MS
Q9NR45	sp|Q9NR45|SIAS_HUMAN	sp|Q9NR45|SIAS_HUMAN	5	5	5	sp|Q9NR45|SIAS_HUMAN Sialic acid synthase OS=Homo sapiens OX=9606 GN=NANS PE=1 SV=2	Sialic acid synthase	NANS	Homo sapiens	1	5	5	5	4	4	4	4	3	1	4	4	4	4	3	1	4	4	4	4	3	1	2022-03-22	2022-03-22	2022-03-22	40.307	359	359	2022-05-03	4	4	4	4	3	1	0	32.249	By MS/MS	By MS/MS	By MS/MS
A5A761	sp|A5A761|SFXN1_PIG;sp|Q9H9B4|SFXN1_HUMAN	sp|A5A761|SFXN1_PIG;sp|Q9H9B4|SFXN1_HUMAN	2;1	2;1	2;1	sp|A5A761|SFXN1_PIG Sideroflexin-1 OS=Sus scrofa OX=9823 GN=SFXN1 PE=2 SV=1;sp|Q9H9B4|SFXN1_HUMAN Sideroflexin-1 OS=Homo sapiens OX=9606 GN=SFXN1 PE=1 SV=4	Sideroflexin-1	SFXN1	Sus scrofa	2	2	2	2	1	2	2	2	2	2	1	2	2	2	2	2	1	2	2	2	2	2	2022-07-08	2022-07-08	2022-07-08	35.624	322	322;322	1973-03-01	1	2	2	2	2	2	0	14.157	By matching	By MS/MS	By MS/MS
Q9BWM7	sp|Q9BWM7|SFXN3_HUMAN	sp|Q9BWM7|SFXN3_HUMAN	1	1	1	sp|Q9BWM7|SFXN3_HUMAN Sideroflexin-3 OS=Homo sapiens OX=9606 GN=SFXN3 PE=1 SV=3	Sideroflexin-3	SFXN3	Homo sapiens	1	1	1	1	1	1	1	1	1	1	1	1	1	1	1	1	1	1	1	1	1	1	2022-07-04	2022-07-04	2022-07-04	35.503	321	321	2022-05-03	1	1	1	1	1	1	0.0053533	66.676	By MS/MS	By matching	By matching
Q764M5	sp|Q764M5|STAT1_PIG	sp|Q764M5|STAT1_PIG	2	2	2	sp|Q764M5|STAT1_PIG Signal transducer and activator of transcription 1 OS=Sus scrofa OX=9823 GN=STAT1 PE=2 SV=1	Signal transducer and activator of transcription 1	STAT1	Sus scrofa	1	2	2	2	2	1	1	1	1	1	2	1	1	1	1	1	2	1	1	1	1	1	2022-02-03	2022-02-03	2022-02-03	88.166	757	757	2014-03-01	2	1	1	1	1	1	0	12.437	By MS/MS	By matching	By matching
Q19S50	sp|Q19S50|STAT3_PIG;sp|P40763|STAT3_HUMAN	sp|Q19S50|STAT3_PIG;sp|P40763|STAT3_HUMAN	1;1	1;1	1;1	sp|Q19S50|STAT3_PIG Signal transducer and activator of transcription 3 OS=Sus scrofa OX=9823 GN=STAT3 PE=1 SV=1;sp|P40763|STAT3_HUMAN Signal transducer and activator of transcription 3 OS=Homo sapiens OX=9606 GN=STAT3 PE=1 SV=2	Signal transducer and activator of transcription 3	STAT3	Sus scrofa	2	1	1	1	0	0	0	0	1	1	0	0	0	0	1	1	0	0	0	0	1	1	2022-04-03	2022-04-03	2022-04-03	88.066	770	770;770	2022-05-05					1	1	0.0023981	8.093
Q92783	sp|Q92783|STAM1_HUMAN	sp|Q92783|STAM1_HUMAN	1	1	1	sp|Q92783|STAM1_HUMAN Signal transducing adapter molecule 1 OS=Homo sapiens OX=9606 GN=STAM PE=1 SV=3	Signal transducing adapter molecule 1	STAM	Homo sapiens	1	1	1	1	1	1	1	1	1	1	1	1	1	1	1	1	1	1	1	1	1	1	2022-06-02	2022-06-02	2022-06-02	59.179	540	540	2022-05-03	1	1	1	1	1	1	0.002331	76.503	By matching	By MS/MS	By MS/MS
O00193	sp|O00193|SMAP_HUMAN	sp|O00193|SMAP_HUMAN	2	2	2	sp|O00193|SMAP_HUMAN Small acidic protein OS=Homo sapiens OX=9606 GN=SMAP PE=1 SV=1	Small acidic protein	SMAP	Homo sapiens	1	2	2	2	1	2	2	1	2	2	1	2	2	1	2	2	1	2	2	1	2	2	2022-03-21	2022-03-21	2022-03-21	20.332	183	183	2022-07-03	1	2	2	1	2	2	0	49.164	By matching	By MS/MS	By MS/MS
O43765	sp|O43765|SGTA_HUMAN	sp|O43765|SGTA_HUMAN	2	2	2	sp|O43765|SGTA_HUMAN Small glutamine-rich tetratricopeptide repeat-containing protein alpha OS=Homo sapiens OX=9606 GN=SGTA PE=1 SV=1	Small glutamine-rich tetratricopeptide repeat-containing protein alpha	SGTA	Homo sapiens	1	2	2	2	1	1	1	2	2	2	1	1	1	2	2	2	1	1	1	2	2	2	8	8	8	34.063	313	313	4	1	1	1	2	2	2	0	11.625	By MS/MS	By MS/MS	By MS/MS
P62316	sp|P62316|SMD2_HUMAN	sp|P62316|SMD2_HUMAN	2	2	2	sp|P62316|SMD2_HUMAN Small nuclear ribonucleoprotein Sm D2 OS=Homo sapiens OX=9606 GN=SNRPD2 PE=1 SV=1	Small nuclear ribonucleoprotein Sm D2	SNRPD2	Homo sapiens	1	2	2	2	2	2	1	1	1	1	2	2	1	1	1	1	2	2	1	1	1	1	2022-04-14	2022-04-14	2022-04-14	13.527	118	118	3	2	2	1	1	1	1	0	11.825	By MS/MS	By MS/MS	By matching
P62318	sp|P62318|SMD3_HUMAN	sp|P62318|SMD3_HUMAN	2	2	2	sp|P62318|SMD3_HUMAN Small nuclear ribonucleoprotein Sm D3 OS=Homo sapiens OX=9606 GN=SNRPD3 PE=1 SV=1	Small nuclear ribonucleoprotein Sm D3	SNRPD3	Homo sapiens	1	2	2	2	2	2	2	1	1	1	2	2	2	1	1	1	2	2	2	1	1	1	2022-02-22	2022-02-22	2022-02-22	13.916	126	126	3	2	2	2	1	1	1	0	23.741	By matching	By matching	By MS/MS
P61958	sp|P61958|SUMO2_PIG;sp|P61956|SUMO2_HUMAN;sp|Q6EEV6|SUMO4_HUMAN;sp|A7WLI0|SUMO4_PIG;sp|P55854|SUMO3_HUMAN	sp|P61958|SUMO2_PIG;sp|P61956|SUMO2_HUMAN;sp|Q6EEV6|SUMO4_HUMAN;sp|A7WLI0|SUMO4_PIG;sp|P55854|SUMO3_HUMAN	2;2;1;1;1	2;2;1;1;1	2;2;1;1;1	sp|P61958|SUMO2_PIG Small ubiquitin-related modifier 2 OS=Sus scrofa OX=9823 GN=SUMO2 PE=3 SV=1;sp|P61956|SUMO2_HUMAN Small ubiquitin-related modifier 2 OS=Homo sapiens OX=9606 GN=SUMO2 PE=1 SV=3;sp|Q6EEV6|SUMO4_HUMAN Small ubiquitin-related modifier 4 OS=	Small ubiquitin-related modifier 2	SUMO2	Sus scrofa	5	2	2	2	2	2	2	2	1	1	2	2	2	2	1	1	2	2	2	2	1	1	2022-02-23	2022-02-23	2022-02-23	10.871	95	95;95;95;95;103	2022-01-03	2	2	2	2	1	1	0	40.259	By MS/MS	By MS/MS	By MS/MS
Q13126	sp|Q13126|MTAP_HUMAN	sp|Q13126|MTAP_HUMAN	1	1	1	sp|Q13126|MTAP_HUMAN S-methyl-5-thioadenosine phosphorylase OS=Homo sapiens OX=9606 GN=MTAP PE=1 SV=2	S-methyl-5-thioadenosine phosphorylase	MTAP	Homo sapiens	1	1	1	1	1	1	1	1	1	1	1	1	1	1	1	1	1	1	1	1	1	1	2022-04-06	2022-04-06	2022-04-06	31.236	283	283	2022-05-03	1	1	1	1	1	1	0	2016-12-01	By MS/MS	By MS/MS	By MS/MS
P30531	sp|P30531|SC6A1_HUMAN	sp|P30531|SC6A1_HUMAN	2	2	2	sp|P30531|SC6A1_HUMAN Sodium- and chloride-dependent GABA transporter 1 OS=Homo sapiens OX=9606 GN=SLC6A1 PE=1 SV=2	Sodium- and chloride-dependent GABA transporter 1	SLC6A1	Homo sapiens	1	2	2	2	2	2	2	2	2	2	2	2	2	2	2	2	2	2	2	2	2	2	2022-07-03	2022-07-03	2022-07-03	67.073	599	599	2022-05-03	2	2	2	2	2	2	0	12.085	By MS/MS	By MS/MS	By MS/MS
P05023	sp|P05023|AT1A1_HUMAN	sp|P05023|AT1A1_HUMAN	24	11	0	sp|P05023|AT1A1_HUMAN Sodium/potassium-transporting ATPase subunit alpha-1 OS=Homo sapiens OX=9606 GN=ATP1A1 PE=1 SV=1	Sodium/potassium-transporting ATPase subunit alpha-1	ATP1A1	Homo sapiens	1	24	11	0	24	24	24	22	24	24	11	11	11	10	11	11	0	0	0	0	0	0	2022-04-30	2022-05-14	0	112.89	1023	1023	1943-03-01	13	13	14	12	12	12	0	306.9	By MS/MS	By MS/MS	By MS/MS
P50993	sp|P50993|AT1A2_HUMAN	sp|P50993|AT1A2_HUMAN	15	3	0	sp|P50993|AT1A2_HUMAN Sodium/potassium-transporting ATPase subunit alpha-2 OS=Homo sapiens OX=9606 GN=ATP1A2 PE=1 SV=1	Sodium/potassium-transporting ATPase subunit alpha-2	ATP1A2	Homo sapiens	1	15	3	0	14	15	14	13	14	15	2	3	2	2	2	3	0	0	0	0	0	0	2022-06-20	2022-05-04	0	112.26	1020	1020	1957-03-01	2	3	2	2	2	3	0	24.586	By matching	By MS/MS	By MS/MS
P13637	sp|P13637|AT1A3_HUMAN;sp|Q13733|AT1A4_HUMAN;sp|P54707|AT12A_HUMAN;sp|P19156|ATP4A_PIG;sp|P20648|ATP4A_HUMAN	sp|P13637|AT1A3_HUMAN	37;7;4;2;2	37;7;4;2;2	22;1;1;0;0	sp|P13637|AT1A3_HUMAN Sodium/potassium-transporting ATPase subunit alpha-3 OS=Homo sapiens OX=9606 GN=ATP1A3 PE=1 SV=3	Sodium/potassium-transporting ATPase subunit alpha-3	ATP1A3	Homo sapiens	5	37	37	22	37	37	37	36	37	37	37	37	37	36	37	37	22	22	22	22	22	22	46.5	46.5	2022-07-28	111.75	1013	1013;1029;1039;1034;1035	1951-03-01	57	61	62	58	59	61	0	323.31	By MS/MS	By MS/MS	By MS/MS
P05027	sp|P05027|AT1B1_PIG;sp|P05026|AT1B1_HUMAN	sp|P05027|AT1B1_PIG	7;2	7;2	7;2	sp|P05027|AT1B1_PIG Sodium/potassium-transporting ATPase subunit beta-1 OS=Sus scrofa OX=9823 GN=ATP1B1 PE=1 SV=2	Sodium/potassium-transporting ATPase subunit beta-1	ATP1B1	Sus scrofa	2	7	7	7	7	7	7	6	6	6	7	7	7	6	6	6	7	7	7	6	6	6	2022-04-27	2022-04-27	2022-04-27	35.158	303	303;303	1949-03-01	8	8	9	8	8	8	0	248.95	By MS/MS	By MS/MS	By MS/MS
P14415	sp|P14415|AT1B2_HUMAN	sp|P14415|AT1B2_HUMAN	5	5	5	sp|P14415|AT1B2_HUMAN Sodium/potassium-transporting ATPase subunit beta-2 OS=Homo sapiens OX=9606 GN=ATP1B2 PE=1 SV=3	Sodium/potassium-transporting ATPase subunit beta-2	ATP1B2	Homo sapiens	1	5	5	5	5	5	5	5	5	4	5	5	5	5	5	4	5	5	5	5	5	4	2022-03-18	2022-03-18	2022-03-18	33.367	290	290	2022-04-03	5	5	6	5	5	4	0	127.04	By MS/MS	By MS/MS	By MS/MS
Q9Y6X4	sp|Q9Y6X4|F169A_HUMAN	sp|Q9Y6X4|F169A_HUMAN	4	4	4	sp|Q9Y6X4|F169A_HUMAN Soluble lamin-associated protein of 75 kDa OS=Homo sapiens OX=9606 GN=FAM169A PE=1 SV=2	Soluble lamin-associated protein of 75 kDa	FAM169A	Homo sapiens	1	4	4	4	2	3	4	4	4	3	2	3	4	4	4	3	2	3	4	4	4	3	2022-06-11	2022-06-11	2022-06-11	74.954	670	670	1981-03-01	3	4	6	6	7	5	0	51.124	By MS/MS	By MS/MS	By MS/MS
Q9H2X9	sp|Q9H2X9|S12A5_HUMAN	sp|Q9H2X9|S12A5_HUMAN	1	1	1	sp|Q9H2X9|S12A5_HUMAN Solute carrier family 12 member 5 OS=Homo sapiens OX=9606 GN=SLC12A5 PE=1 SV=3	Solute carrier family 12 member 5	SLC12A5	Homo sapiens	1	1	1	1	1	1	1	1	1	1	1	1	1	1	1	1	1	1	1	1	1	1	2022-08-01	2022-08-01	2022-08-01	126.18	1139	1139	2022-05-03	1	1	1	1	1	1	0.0023781	79.617	By MS/MS	By MS/MS	By MS/MS
P20303	sp|P20303|GTR1_PIG;sp|P11166|GTR1_HUMAN	sp|P20303|GTR1_PIG;sp|P11166|GTR1_HUMAN	4;4	4;4	4;4	sp|P20303|GTR1_PIG Solute carrier family 2, facilitated glucose transporter member 1 OS=Sus scrofa OX=9823 GN=SLC2A1 PE=2 SV=2;sp|P11166|GTR1_HUMAN Solute carrier family 2, facilitated glucose transporter member 1 OS=Homo sapiens OX=9606 GN=SLC2A1 PE=1 SV=	Solute carrier family 2, facilitated glucose transporter member 1	SLC2A1	Sus scrofa	2	4	4	4	4	4	4	4	4	4	4	4	4	4	4	4	4	4	4	4	4	4	2022-07-08	2022-07-08	2022-07-08	54.035	492	492;492	2022-05-03	4	4	4	4	4	4	0	49.286	By MS/MS	By MS/MS	By MS/MS
Q29318	sp|Q29318|DHSO_PIG	sp|Q29318|DHSO_PIG	1	1	1	sp|Q29318|DHSO_PIG Sorbitol dehydrogenase (Fragment) OS=Sus scrofa OX=9823 GN=SORD PE=2 SV=2	Sorbitol dehydrogenase (Fragment)	SORD	Sus scrofa	1	1	1	1	1	1	1	1	1	1	1	1	1	1	1	1	1	1	1	1	1	1	2022-06-19	2022-06-19	2022-06-19	98.813	97	97	2022-05-03	1	1	1	1	1	1	0.0023613	78.413	By MS/MS	By MS/MS	By MS/MS
P30626	sp|P30626|SORCN_HUMAN	sp|P30626|SORCN_HUMAN	2	2	2	sp|P30626|SORCN_HUMAN Sorcin OS=Homo sapiens OX=9606 GN=SRI PE=1 SV=1	Sorcin	SRI	Homo sapiens	1	2	2	2	2	2	2	2	2	2	2	2	2	2	2	2	2	2	2	2	2	2	2022-06-11	2022-06-11	2022-06-11	21.676	198	198	2022-05-03	2	2	2	2	2	2	0	12.261	By MS/MS	By matching	By MS/MS
Q9UMY4	sp|Q9UMY4|SNX12_HUMAN	sp|Q9UMY4|SNX12_HUMAN	1	1	1	sp|Q9UMY4|SNX12_HUMAN Sorting nexin-12 OS=Homo sapiens OX=9606 GN=SNX12 PE=1 SV=4	Sorting nexin-12	SNX12	Homo sapiens	1	1	1	1	1	1	1	1	1	1	1	1	1	1	1	1	1	1	1	1	1	1	2022-06-08	2022-06-08	2022-06-08	18.884	162	162	2022-05-03	1	1	1	1	1	1	0.0023641	78.624	By MS/MS	By matching	By MS/MS
Q13813	sp|Q13813|SPTN1_HUMAN	sp|Q13813|SPTN1_HUMAN	47	47	47	sp|Q13813|SPTN1_HUMAN Spectrin alpha chain, non-erythrocytic 1 OS=Homo sapiens OX=9606 GN=SPTAN1 PE=1 SV=3	Spectrin alpha chain, non-erythrocytic 1	SPTAN1	Homo sapiens	1	47	47	47	40	45	45	41	41	40	40	45	45	41	41	40	40	45	45	41	41	40	2022-04-29	2022-04-29	2022-04-29	284.54	2472	2472	1944-03-01	50	57	58	51	51	48	0	323.31	By MS/MS	By MS/MS	By MS/MS
Q01082	sp|Q01082|SPTB2_HUMAN;sp|O15020|SPTN2_HUMAN;sp|P11277|SPTB1_HUMAN	sp|Q01082|SPTB2_HUMAN	57;3;1	57;3;1	57;3;1	sp|Q01082|SPTB2_HUMAN Spectrin beta chain, non-erythrocytic 1 OS=Homo sapiens OX=9606 GN=SPTBN1 PE=1 SV=2	Spectrin beta chain, non-erythrocytic 1	SPTBN1	Homo sapiens	3	57	57	57	52	54	54	47	48	45	52	54	54	47	48	45	52	54	54	47	48	45	34.3	34.3	34.3	274.61	2364	2364;2390;2137	1943-03-01	56	59	58	51	53	52	0	323.31	By MS/MS	By MS/MS	By MS/MS
P52788	sp|P52788|SPSY_HUMAN	sp|P52788|SPSY_HUMAN	1	1	1	sp|P52788|SPSY_HUMAN Spermine synthase OS=Homo sapiens OX=9606 GN=SMS PE=1 SV=2	Spermine synthase	SMS	Homo sapiens	1	1	1	1	1	1	1	1	1	1	1	1	1	1	1	1	1	1	1	1	1	1	2022-09-04	2022-09-04	2022-09-04	41.268	366	366	2022-05-03	1	1	1	1	1	1	0.0034483	74.528	By MS/MS	By MS/MS	By MS/MS
P63208	sp|P63208|SKP1_HUMAN	sp|P63208|SKP1_HUMAN	3	3	3	sp|P63208|SKP1_HUMAN S-phase kinase-associated protein 1 OS=Homo sapiens OX=9606 GN=SKP1 PE=1 SV=2	S-phase kinase-associated protein 1	SKP1	Homo sapiens	1	3	3	3	3	3	3	3	3	3	3	3	3	3	3	3	3	3	3	3	3	3	16	16	16	18.658	163	163	2022-05-03	3	3	3	3	3	3	0	81.272	By MS/MS	By MS/MS	By MS/MS
Q13838	sp|Q13838|DX39B_HUMAN;sp|Q29024|DX39B_PIG;sp|O00148|DX39A_HUMAN	sp|Q13838|DX39B_HUMAN;sp|Q29024|DX39B_PIG	6;6;2	6;6;2	6;6;2	sp|Q13838|DX39B_HUMAN Spliceosome RNA helicase DDX39B OS=Homo sapiens OX=9606 GN=DDX39B PE=1 SV=1;sp|Q29024|DX39B_PIG Spliceosome RNA helicase DDX39B OS=Sus scrofa OX=9823 GN=DDX39B PE=3 SV=2	Spliceosome RNA helicase DDX39B	DDX39B	Homo sapiens	3	6	6	6	6	6	6	6	6	6	6	6	6	6	6	6	6	6	6	6	6	6	2022-08-24	2022-08-24	2022-08-24	48.991	428	428;428;427	1961-03-01	6	6	6	6	7	7	0	54.709	By MS/MS	By MS/MS	By MS/MS
O75533	sp|O75533|SF3B1_HUMAN	sp|O75533|SF3B1_HUMAN	2	2	2	sp|O75533|SF3B1_HUMAN Splicing factor 3B subunit 1 OS=Homo sapiens OX=9606 GN=SF3B1 PE=1 SV=3	Splicing factor 3B subunit 1	SF3B1	Homo sapiens	1	2	2	2	1	1	1	2	2	2	1	1	1	2	2	2	1	1	1	2	2	2	2022-08-01	2022-08-01	2022-08-01	145.83	1304	1304	4	1	1	1	2	2	2	0	11.741	By matching	By MS/MS	By MS/MS
Q15393	sp|Q15393|SF3B3_HUMAN	sp|Q15393|SF3B3_HUMAN	2	2	2	sp|Q15393|SF3B3_HUMAN Splicing factor 3B subunit 3 OS=Homo sapiens OX=9606 GN=SF3B3 PE=1 SV=4	Splicing factor 3B subunit 3	SF3B3	Homo sapiens	1	2	2	2	1	1	2	2	2	2	1	1	2	2	2	2	1	1	2	2	2	2	2022-01-02	2022-01-02	2022-01-02	135.58	1217	1217	2022-09-03	1	1	2	2	2	2	0.001297	11.296	By matching	By MS/MS	By MS/MS
Q01081	sp|Q01081|U2AF1_HUMAN;sp|P0DN76|U2AF5_HUMAN	sp|Q01081|U2AF1_HUMAN;sp|P0DN76|U2AF5_HUMAN	2;2	2;2	2;2	sp|Q01081|U2AF1_HUMAN Splicing factor U2AF 35 kDa subunit OS=Homo sapiens OX=9606 GN=U2AF1 PE=1 SV=3;sp|P0DN76|U2AF5_HUMAN Splicing factor U2AF 35 kDa subunit-like protein OS=Homo sapiens OX=9606 GN=U2AF1L5 PE=1 SV=1	Splicing factor U2AF 35 kDa subunit	U2AF1	Homo sapiens	2	2	2	2	1	1	2	2	1	1	1	1	2	2	1	1	1	1	2	2	1	1	2022-09-12	2022-09-12	2022-09-12	27.872	240	240;240	2022-05-03	1	1	2	2	1	1	0	12.367	By matching	By MS/MS	By MS/MS
P26368	sp|P26368|U2AF2_HUMAN	sp|P26368|U2AF2_HUMAN	2	2	2	sp|P26368|U2AF2_HUMAN Splicing factor U2AF 65 kDa subunit OS=Homo sapiens OX=9606 GN=U2AF2 PE=1 SV=4	Splicing factor U2AF 65 kDa subunit	U2AF2	Homo sapiens	1	2	2	2	1	2	2	2	2	1	1	2	2	2	2	1	1	2	2	2	2	1	2022-08-07	2022-08-07	2022-08-07	53.5	475	475	2027-03-01	2	2	2	2	2	1	0	23.505	By MS/MS	By MS/MS	By MS/MS
P23246	sp|P23246|SFPQ_HUMAN	sp|P23246|SFPQ_HUMAN	5	5	5	sp|P23246|SFPQ_HUMAN Splicing factor, proline- and glutamine-rich OS=Homo sapiens OX=9606 GN=SFPQ PE=1 SV=2	Splicing factor, proline- and glutamine-rich	SFPQ	Homo sapiens	1	5	5	5	5	5	5	5	5	5	5	5	5	5	5	5	5	5	5	5	5	5	2022-02-09	2022-02-09	2022-02-09	76.149	707	707	2022-05-03	6	6	6	6	6	6	0	37.324	By MS/MS	By MS/MS	By MS/MS
Q6DUB7	sp|Q6DUB7|STMN1_PIG;sp|P16949|STMN1_HUMAN	sp|Q6DUB7|STMN1_PIG;sp|P16949|STMN1_HUMAN	2;2	2;2	2;2	sp|Q6DUB7|STMN1_PIG Stathmin OS=Sus scrofa OX=9823 GN=STMN1 PE=2 SV=3;sp|P16949|STMN1_HUMAN Stathmin OS=Homo sapiens OX=9606 GN=STMN1 PE=1 SV=3	Stathmin	STMN1	Sus scrofa	2	2	2	2	2	2	2	2	2	2	2	2	2	2	2	2	2	2	2	2	2	2	2022-01-14	2022-01-14	2022-01-14	17.302	149	149;149	2022-05-03	2	2	2	2	2	2	0	11.767	By MS/MS	By MS/MS	By MS/MS
P22307	sp|P22307|SCP2_HUMAN	sp|P22307|SCP2_HUMAN	1	1	1	sp|P22307|SCP2_HUMAN Sterol carrier protein 2 OS=Homo sapiens OX=9606 GN=SCP2 PE=1 SV=2	Sterol carrier protein 2	SCP2	Homo sapiens	1	1	1	1	1	1	1	1	1	1	1	1	1	1	1	1	1	1	1	1	1	1	2022-08-01	2022-08-01	2022-08-01	58.993	547	547	2022-05-03	1	1	1	1	1	1	0.0033784	72.129	By MS/MS	By MS/MS	By MS/MS
Q9UJZ1	sp|Q9UJZ1|STML2_HUMAN	sp|Q9UJZ1|STML2_HUMAN	1	1	1	sp|Q9UJZ1|STML2_HUMAN Stomatin-like protein 2, mitochondrial OS=Homo sapiens OX=9606 GN=STOML2 PE=1 SV=1	Stomatin-like protein 2, mitochondrial	STOML2	Homo sapiens	1	1	1	1	0	1	1	1	1	1	0	1	1	1	1	1	0	1	1	1	1	1	2022-08-04	2022-08-04	2022-08-04	38.534	356	356	4		1	1	1	1	1	0.002457	87.493		By matching	By matching
P38646	sp|P38646|GRP75_HUMAN	sp|P38646|GRP75_HUMAN	12	12	12	sp|P38646|GRP75_HUMAN Stress-70 protein, mitochondrial OS=Homo sapiens OX=9606 GN=HSPA9 PE=1 SV=2	Stress-70 protein, mitochondrial	HSPA9	Homo sapiens	1	12	12	12	12	11	11	11	10	10	12	11	11	11	10	10	12	11	11	11	10	10	2022-08-26	2022-08-26	2022-08-26	73.68	679	679	1946-03-01	12	11	11	11	11	11	0	165.25	By MS/MS	By MS/MS	By MS/MS
P31948	sp|P31948|STIP1_HUMAN	sp|P31948|STIP1_HUMAN	3	3	3	sp|P31948|STIP1_HUMAN Stress-induced-phosphoprotein 1 OS=Homo sapiens OX=9606 GN=STIP1 PE=1 SV=1	Stress-induced-phosphoprotein 1	STIP1	Homo sapiens	1	3	3	3	3	3	3	3	3	3	3	3	3	3	3	3	3	3	3	3	3	3	2022-08-06	2022-08-06	2022-08-06	62.639	543	543	2022-05-03	3	3	3	3	3	3	0	19.959	By MS/MS	By MS/MS	By MS/MS
Q96SB8	sp|Q96SB8|SMC6_HUMAN	sp|Q96SB8|SMC6_HUMAN	1	1	1	sp|Q96SB8|SMC6_HUMAN Structural maintenance of chromosomes protein 6 OS=Homo sapiens OX=9606 GN=SMC6 PE=1 SV=2	Structural maintenance of chromosomes protein 6	SMC6	Homo sapiens	1	1	1	1	1	1	1	1	1	1	1	1	1	1	1	1	1	1	1	1	1	1	2022-04-01	2022-04-01	2022-04-01	126.32	1091	1091	2022-05-03	1	1	1	1	1	1	0.0025063	97.692	By MS/MS	By MS/MS	By MS/MS
Q0QF01	sp|Q0QF01|SDHA_PIG;sp|P31040|SDHA_HUMAN	sp|Q0QF01|SDHA_PIG;sp|P31040|SDHA_HUMAN	8;5	8;5	8;5	sp|Q0QF01|SDHA_PIG Succinate dehydrogenase [ubiquinone] flavoprotein subunit, mitochondrial OS=Sus scrofa OX=9823 GN=SDHA PE=1 SV=2;sp|P31040|SDHA_HUMAN Succinate dehydrogenase [ubiquinone] flavoprotein subunit, mitochondrial OS=Homo sapiens OX=9606 GN=SDH	Succinate dehydrogenase [ubiquinone] flavoprotein subunit, mitochondrial	SDHA	Sus scrofa	2	8	8	8	7	6	7	7	7	7	7	6	7	7	7	7	7	6	7	7	7	7	2022-09-23	2022-09-23	2022-09-23	72.831	664	664;664	1953-03-01	8	7	8	8	8	8	0	126.78	By MS/MS	By MS/MS	By MS/MS
O19069	sp|O19069|SUCA_PIG;sp|P53597|SUCA_HUMAN	sp|O19069|SUCA_PIG	5;2	5;2	5;2	sp|O19069|SUCA_PIG Succinate--CoA ligase [ADP/GDP-forming] subunit alpha, mitochondrial OS=Sus scrofa OX=9823 GN=SUCLG1 PE=1 SV=2	Succinate--CoA ligase [ADP/GDP-forming] subunit alpha, mitochondrial	SUCLG1	Sus scrofa	2	5	5	5	5	5	5	5	5	5	5	5	5	5	5	5	5	5	5	5	5	5	2022-03-26	2022-03-26	2022-03-26	36.116	346	346;346	1931-03-01	6	7	7	5	5	5	0	55.159	By MS/MS	By MS/MS	By MS/MS
O97580	sp|O97580|SUCB1_PIG	sp|O97580|SUCB1_PIG	8	8	2	sp|O97580|SUCB1_PIG Succinate--CoA ligase [ADP-forming] subunit beta, mitochondrial (Fragment) OS=Sus scrofa OX=9823 GN=SUCLA2 PE=2 SV=1	Succinate--CoA ligase [ADP-forming] subunit beta, mitochondrial (Fragment)	SUCLA2	Sus scrofa	1	8	8	2	8	8	8	8	6	8	8	8	8	8	6	8	2	2	2	2	1	2	2022-05-23	2022-05-23	2022-02-05	46.258	425	425	2022-04-03	9	9	9	12	6	8	0	140.53	By MS/MS	By MS/MS	By MS/MS
Q96I99	sp|Q96I99|SUCB2_HUMAN;sp|P53590|SUCB2_PIG	sp|Q96I99|SUCB2_HUMAN;sp|P53590|SUCB2_PIG	2;2	2;2	2;2	sp|Q96I99|SUCB2_HUMAN Succinate--CoA ligase [GDP-forming] subunit beta, mitochondrial OS=Homo sapiens OX=9606 GN=SUCLG2 PE=1 SV=2;sp|P53590|SUCB2_PIG Succinate--CoA ligase [GDP-forming] subunit beta, mitochondrial (Fragment) OS=Sus scrofa OX=9823 GN=SUCLG2	Succinate--CoA ligase [GDP-forming] subunit beta, mitochondrial	SUCLG2	Homo sapiens	2	2	2	2	2	2	2	2	2	2	2	2	2	2	2	2	2	2	2	2	2	2	2022-02-06	2022-02-06	2022-02-06	46.51	432	432;433	2022-05-03	2	2	2	2	2	2	0	19.258	By MS/MS	By MS/MS	By MS/MS
Q9Y6N5	sp|Q9Y6N5|SQOR_HUMAN	sp|Q9Y6N5|SQOR_HUMAN	5	5	5	sp|Q9Y6N5|SQOR_HUMAN Sulfide:quinone oxidoreductase, mitochondrial OS=Homo sapiens OX=9606 GN=SQOR PE=1 SV=1	Sulfide:quinone oxidoreductase, mitochondrial	SQOR	Homo sapiens	1	5	5	5	5	5	5	5	5	5	5	5	5	5	5	5	5	5	5	5	5	5	2022-04-16	2022-04-16	2022-04-16	49.96	450	450	1968-03-01	5	5	5	6	7	6	0	37.08	By MS/MS	By MS/MS	By MS/MS
Q9UBT2	sp|Q9UBT2|SAE2_HUMAN	sp|Q9UBT2|SAE2_HUMAN	2	2	2	sp|Q9UBT2|SAE2_HUMAN SUMO-activating enzyme subunit 2 OS=Homo sapiens OX=9606 GN=UBA2 PE=1 SV=2	SUMO-activating enzyme subunit 2	UBA2	Homo sapiens	1	2	2	2	2	2	2	2	1	1	2	2	2	2	1	1	2	2	2	2	1	1	2022-03-07	2022-03-07	2022-03-07	71.223	640	640	2022-01-03	2	2	2	2	1	1	0	12.708	By MS/MS	By MS/MS	By MS/MS
P04178	sp|P04178|SODC_PIG	sp|P04178|SODC_PIG	6	6	6	sp|P04178|SODC_PIG Superoxide dismutase [Cu-Zn] OS=Sus scrofa OX=9823 GN=SOD1 PE=1 SV=2	Superoxide dismutase [Cu-Zn]	SOD1	Sus scrofa	1	6	6	6	6	6	6	6	6	6	6	6	6	6	6	6	6	6	6	6	6	6	68.6	68.6	68.6	15.892	153	153	1951-03-01	11	12	11	14	13	10	0	176.56	By MS/MS	By MS/MS	By MS/MS
P04179	sp|P04179|SODM_HUMAN	sp|P04179|SODM_HUMAN	2	1	1	sp|P04179|SODM_HUMAN Superoxide dismutase [Mn], mitochondrial OS=Homo sapiens OX=9606 GN=SOD2 PE=1 SV=3	Superoxide dismutase [Mn], mitochondrial	SOD2	Homo sapiens	1	2	1	1	2	2	2	2	2	2	1	1	1	1	1	1	1	1	1	1	1	1	2022-06-17	2022-03-06	2022-03-06	24.75	222	222	2022-05-03	1	1	1	1	1	1	0	46.143	By MS/MS	By MS/MS	By MS/MS
P28768	sp|P28768|SODM_PIG	sp|P28768|SODM_PIG	3	3	2	sp|P28768|SODM_PIG Superoxide dismutase [Mn], mitochondrial (Fragment) OS=Sus scrofa OX=9823 GN=SOD2 PE=2 SV=1	Superoxide dismutase [Mn], mitochondrial (Fragment)	SOD2	Sus scrofa	1	3	3	2	3	3	3	3	3	3	3	3	3	3	3	3	2	2	2	2	2	2	2022-08-27	2022-08-27	2022-04-10	15.638	144	144	2022-05-03	3	3	3	3	3	3	0	46.156	By MS/MS	By MS/MS	By MS/MS
P17600	sp|P17600|SYN1_HUMAN	sp|P17600|SYN1_HUMAN	6	6	6	sp|P17600|SYN1_HUMAN Synapsin-1 OS=Homo sapiens OX=9606 GN=SYN1 PE=1 SV=3	Synapsin-1	SYN1	Homo sapiens	1	6	6	6	4	6	6	5	5	4	4	6	6	5	5	4	4	6	6	5	5	4	2022-02-16	2022-02-16	2022-02-16	74.111	705	705	1948-03-01	5	6	6	5	6	5	0	40.287	By MS/MS	By MS/MS	By MS/MS
Q7L0J3	sp|Q7L0J3|SV2A_HUMAN	sp|Q7L0J3|SV2A_HUMAN	3	3	3	sp|Q7L0J3|SV2A_HUMAN Synaptic vesicle glycoprotein 2A OS=Homo sapiens OX=9606 GN=SV2A PE=1 SV=1	Synaptic vesicle glycoprotein 2A	SV2A	Homo sapiens	1	3	3	3	3	3	3	2	3	3	3	3	3	2	3	3	3	3	3	2	3	3	2022-07-05	2022-07-05	2022-07-05	82.694	742	742	1947-03-01	3	3	3	2	3	3	0	21.456	By MS/MS	By MS/MS	By MS/MS
Q9HCJ6	sp|Q9HCJ6|VAT1L_HUMAN	sp|Q9HCJ6|VAT1L_HUMAN	3	3	3	sp|Q9HCJ6|VAT1L_HUMAN Synaptic vesicle membrane protein VAT-1 homolog-like OS=Homo sapiens OX=9606 GN=VAT1L PE=1 SV=2	Synaptic vesicle membrane protein VAT-1 homolog-like	VAT1L	Homo sapiens	1	3	3	3	3	3	3	2	3	2	3	3	3	2	3	2	3	3	3	2	3	2	2022-02-12	2022-02-12	2022-02-12	45.899	419	419	1931-03-01	3	3	3	2	3	2	0	24.875	By MS/MS	By MS/MS	By MS/MS
O43759	sp|O43759|SNG1_HUMAN	sp|O43759|SNG1_HUMAN	1	1	1	sp|O43759|SNG1_HUMAN Synaptogyrin-1 OS=Homo sapiens OX=9606 GN=SYNGR1 PE=1 SV=2	Synaptogyrin-1	SYNGR1	Homo sapiens	1	1	1	1	1	1	1	1	1	1	1	1	1	1	1	1	1	1	1	1	1	1	2022-03-04	2022-03-04	2022-03-04	25.455	233	233	2022-05-03	1	1	1	1	1	1	0	12.318	By MS/MS	By MS/MS	By MS/MS
O43426	sp|O43426|SYNJ1_HUMAN	sp|O43426|SYNJ1_HUMAN	4	4	4	sp|O43426|SYNJ1_HUMAN Synaptojanin-1 OS=Homo sapiens OX=9606 GN=SYNJ1 PE=1 SV=2	Synaptojanin-1	SYNJ1	Homo sapiens	1	4	4	4	4	4	4	3	2	2	4	4	4	3	2	2	4	4	4	3	2	2	2022-02-03	2022-02-03	2022-02-03	173.1	1573	1573	2022-05-03	4	4	4	3	2	2	0	24.437	By MS/MS	By MS/MS	By MS/MS
Q8TBG9	sp|Q8TBG9|SYNPR_HUMAN	sp|Q8TBG9|SYNPR_HUMAN	1	1	1	sp|Q8TBG9|SYNPR_HUMAN Synaptoporin OS=Homo sapiens OX=9606 GN=SYNPR PE=1 SV=1	Synaptoporin	SYNPR	Homo sapiens	1	1	1	1	0	1	1	1	1	1	0	1	1	1	1	1	0	1	1	1	1	1	2022-03-05	2022-03-05	2022-03-05	29.166	265	265	2017-04-01		1	1	1	2	1	0.003337	70.631		By MS/MS	By matching
P60880	sp|P60880|SNP25_HUMAN	sp|P60880|SNP25_HUMAN	9	9	9	sp|P60880|SNP25_HUMAN Synaptosomal-associated protein 25 OS=Homo sapiens OX=9606 GN=SNAP25 PE=1 SV=1	Synaptosomal-associated protein 25	SNAP25	Homo sapiens	1	9	9	9	9	8	8	6	5	6	9	8	8	6	5	6	9	8	8	6	5	6	49.5	49.5	49.5	23.315	206	206	2022-03-03	10	9	9	8	6	8	0	104.94	By MS/MS	By MS/MS	By MS/MS
P21579	sp|P21579|SYT1_HUMAN;sp|Q8N9I0|SYT2_HUMAN;sp|O00445|SYT5_HUMAN	sp|P21579|SYT1_HUMAN	15;3;1	15;3;1	15;3;1	sp|P21579|SYT1_HUMAN Synaptotagmin-1 OS=Homo sapiens OX=9606 GN=SYT1 PE=1 SV=1	Synaptotagmin-1	SYT1	Homo sapiens	3	15	15	15	14	14	12	13	13	13	14	14	12	13	13	13	14	14	12	13	13	13	44.3	44.3	44.3	47.573	422	422;419;386	1951-03-01	16	18	17	17	17	17	0	195.78	By MS/MS	By MS/MS	By MS/MS
P61266	sp|P61266|STX1B_HUMAN	sp|P61266|STX1B_HUMAN	6	6	6	sp|P61266|STX1B_HUMAN Syntaxin-1B OS=Homo sapiens OX=9606 GN=STX1B PE=1 SV=1	Syntaxin-1B	STX1B	Homo sapiens	1	6	6	6	6	6	6	6	5	5	6	6	6	6	5	5	6	6	6	6	5	5	29.2	29.2	29.2	33.244	288	288	2022-04-03	7	7	7	7	6	6	0	112.05	By MS/MS	By MS/MS	By MS/MS
Q13277	sp|Q13277|STX3_HUMAN	sp|Q13277|STX3_HUMAN	6	6	6	sp|Q13277|STX3_HUMAN Syntaxin-3 OS=Homo sapiens OX=9606 GN=STX3 PE=1 SV=3	Syntaxin-3	STX3	Homo sapiens	1	6	6	6	4	6	4	4	4	4	4	6	4	4	4	4	4	6	4	4	4	4	2022-07-18	2022-07-18	2022-07-18	33.155	289	289	1938-03-01	4	6	4	4	4	4	0	103.25	By MS/MS	By MS/MS	By MS/MS
P61764	sp|P61764|STXB1_HUMAN	sp|P61764|STXB1_HUMAN	20	20	20	sp|P61764|STXB1_HUMAN Syntaxin-binding protein 1 OS=Homo sapiens OX=9606 GN=STXBP1 PE=1 SV=1	Syntaxin-binding protein 1	STXBP1	Homo sapiens	1	20	20	20	20	19	18	19	19	19	20	19	18	19	19	19	20	19	18	19	19	19	45.3	45.3	45.3	67.568	594	594	1949-03-01	28	26	24	25	26	27	0	285.69	By MS/MS	By MS/MS	By MS/MS
Q9Y4G6	sp|Q9Y4G6|TLN2_HUMAN	sp|Q9Y4G6|TLN2_HUMAN	8	8	7	sp|Q9Y4G6|TLN2_HUMAN Talin-2 OS=Homo sapiens OX=9606 GN=TLN2 PE=1 SV=4	Talin-2	TLN2	Homo sapiens	1	8	8	7	5	7	7	6	6	6	5	7	7	6	6	6	4	6	6	5	5	5	2022-05-05	2022-05-05	5	271.61	2542	2542	1951-03-01	5	7	7	6	6	6	0	100.31	By MS/MS	By MS/MS	By MS/MS
P17987	sp|P17987|TCPA_HUMAN	sp|P17987|TCPA_HUMAN	12	12	12	sp|P17987|TCPA_HUMAN T-complex protein 1 subunit alpha OS=Homo sapiens OX=9606 GN=TCP1 PE=1 SV=1	T-complex protein 1 subunit alpha	TCP1	Homo sapiens	1	12	12	12	12	12	12	12	12	12	12	12	12	12	12	12	12	12	12	12	12	12	2022-03-29	2022-03-29	2022-03-29	60.343	556	556	1957-03-01	12	13	13	13	15	13	0	101.99	By MS/MS	By MS/MS	By MS/MS
P78371	sp|P78371|TCPB_HUMAN	sp|P78371|TCPB_HUMAN	13	13	13	sp|P78371|TCPB_HUMAN T-complex protein 1 subunit beta OS=Homo sapiens OX=9606 GN=CCT2 PE=1 SV=4	T-complex protein 1 subunit beta	CCT2	Homo sapiens	1	13	13	13	11	11	12	11	12	11	11	11	12	11	12	11	11	11	12	11	12	11	36.4	36.4	36.4	57.488	535	535	1946-03-01	13	13	16	14	13	12	0	127.94	By MS/MS	By MS/MS	By MS/MS
P50991	sp|P50991|TCPD_HUMAN	sp|P50991|TCPD_HUMAN	7	7	7	sp|P50991|TCPD_HUMAN T-complex protein 1 subunit delta OS=Homo sapiens OX=9606 GN=CCT4 PE=1 SV=4	T-complex protein 1 subunit delta	CCT4	Homo sapiens	1	7	7	7	7	7	7	6	7	7	7	7	7	6	7	7	7	7	7	6	7	7	2022-06-20	2022-06-20	2022-06-20	57.924	539	539	1944-03-01	9	9	9	8	9	8	0	81.108	By MS/MS	By MS/MS	By MS/MS
P48643	sp|P48643|TCPE_HUMAN	sp|P48643|TCPE_HUMAN	7	7	7	sp|P48643|TCPE_HUMAN T-complex protein 1 subunit epsilon OS=Homo sapiens OX=9606 GN=CCT5 PE=1 SV=1	T-complex protein 1 subunit epsilon	CCT5	Homo sapiens	1	7	7	7	6	6	6	6	6	5	6	6	6	6	6	5	6	6	6	6	6	5	2022-07-20	2022-07-20	2022-07-20	59.67	541	541	1954-03-01	6	7	7	7	8	6	0	48.494	By MS/MS	By MS/MS	By MS/MS
Q99832	sp|Q99832|TCPH_HUMAN	sp|Q99832|TCPH_HUMAN	10	10	10	sp|Q99832|TCPH_HUMAN T-complex protein 1 subunit eta OS=Homo sapiens OX=9606 GN=CCT7 PE=1 SV=2	T-complex protein 1 subunit eta	CCT7	Homo sapiens	1	10	10	10	10	10	10	10	9	10	10	10	10	10	9	10	10	10	10	10	9	10	2022-02-26	2022-02-26	2022-02-26	59.366	543	543	2022-05-03	10	10	10	10	10	10	0	102.14	By MS/MS	By MS/MS	By MS/MS
P49368	sp|P49368|TCPG_HUMAN	sp|P49368|TCPG_HUMAN	11	11	11	sp|P49368|TCPG_HUMAN T-complex protein 1 subunit gamma OS=Homo sapiens OX=9606 GN=CCT3 PE=1 SV=4	T-complex protein 1 subunit gamma	CCT3	Homo sapiens	1	11	11	11	9	10	10	8	9	9	9	10	10	8	9	9	9	10	10	8	9	9	2022-02-27	2022-02-27	2022-02-27	60.533	545	545	1945-03-01	9	10	10	8	9	9	0	74.343	By MS/MS	By MS/MS	By MS/MS
P50990	sp|P50990|TCPQ_HUMAN	sp|P50990|TCPQ_HUMAN	13	13	13	sp|P50990|TCPQ_HUMAN T-complex protein 1 subunit theta OS=Homo sapiens OX=9606 GN=CCT8 PE=1 SV=4	T-complex protein 1 subunit theta	CCT8	Homo sapiens	1	13	13	13	10	12	12	12	13	11	10	12	12	12	13	11	10	12	12	12	13	11	36.1	36.1	36.1	59.62	548	548	1961-03-01	10	12	12	12	14	12	0	91.905	By MS/MS	By MS/MS	By MS/MS
P40227	sp|P40227|TCPZ_HUMAN;sp|Q29236|TCPZ_PIG;sp|Q92526|TCPW_HUMAN	sp|P40227|TCPZ_HUMAN	5;2;2	5;2;2	5;2;2	sp|P40227|TCPZ_HUMAN T-complex protein 1 subunit zeta OS=Homo sapiens OX=9606 GN=CCT6A PE=1 SV=3	T-complex protein 1 subunit zeta	CCT6A	Homo sapiens	3	5	5	5	5	5	5	5	5	5	5	5	5	5	5	5	5	5	5	5	5	5	16	16	16	58.024	531	531;104;530	1945-03-01	5	6	5	5	5	5	0	162.99	By MS/MS	By MS/MS	By MS/MS
Q92752	sp|Q92752|TENR_HUMAN	sp|Q92752|TENR_HUMAN	1	1	1	sp|Q92752|TENR_HUMAN Tenascin-R OS=Homo sapiens OX=9606 GN=TNR PE=1 SV=3	Tenascin-R	TNR	Homo sapiens	1	1	1	1	0	0	1	1	1	1	0	0	1	1	1	1	0	0	1	1	1	1	2022-03-01	2022-03-01	2022-03-01	149.56	1358	1358	2022-05-04			1	1	1	1	0.0024814	92.291			By MS/MS
P47788	sp|P47788|THOP1_PIG	sp|P47788|THOP1_PIG	3	3	3	sp|P47788|THOP1_PIG Thimet oligopeptidase OS=Sus scrofa OX=9823 GN=THOP1 PE=2 SV=2	Thimet oligopeptidase	THOP1	Sus scrofa	1	3	3	3	3	3	3	3	3	3	3	3	3	3	3	3	3	3	3	3	3	3	2022-04-07	2022-04-07	2022-04-07	78.143	687	687	2022-05-03	3	3	3	3	3	3	0	57.54	By MS/MS	By MS/MS	By MS/MS
P82460	sp|P82460|THIO_PIG	sp|P82460|THIO_PIG	1	1	1	sp|P82460|THIO_PIG Thioredoxin OS=Sus scrofa OX=9823 GN=TXN PE=1 SV=3	Thioredoxin	TXN	Sus scrofa	1	1	1	1	1	1	1	1	1	1	1	1	1	1	1	1	1	1	1	1	1	1	2022-04-12	2022-04-12	2022-04-12	11.828	105	105	2022-05-03	1	1	1	1	1	1	0	87.293	By MS/MS	By MS/MS	By MS/MS
Q99757	sp|Q99757|THIOM_HUMAN	sp|Q99757|THIOM_HUMAN	2	2	2	sp|Q99757|THIOM_HUMAN Thioredoxin, mitochondrial OS=Homo sapiens OX=9606 GN=TXN2 PE=1 SV=2	Thioredoxin, mitochondrial	TXN2	Homo sapiens	1	2	2	2	2	2	2	2	2	2	2	2	2	2	2	2	2	2	2	2	2	2	2022-07-21	2022-07-21	2022-07-21	18.383	166	166	2022-05-03	2	2	2	2	2	2	0	15.802	By MS/MS	By MS/MS	By MS/MS
P30048	sp|P30048|PRDX3_HUMAN	sp|P30048|PRDX3_HUMAN	4	4	4	sp|P30048|PRDX3_HUMAN Thioredoxin-dependent peroxide reductase, mitochondrial OS=Homo sapiens OX=9606 GN=PRDX3 PE=1 SV=3	Thioredoxin-dependent peroxide reductase, mitochondrial	PRDX3	Homo sapiens	1	4	4	4	3	4	4	4	4	4	3	4	4	4	4	4	3	4	4	4	4	4	2022-06-24	2022-06-24	2022-06-24	27.692	256	256	1961-03-01	6	6	6	6	7	7	0	61.425	By MS/MS	By MS/MS	By MS/MS
O43396	sp|O43396|TXNL1_HUMAN	sp|O43396|TXNL1_HUMAN	4	4	4	sp|O43396|TXNL1_HUMAN Thioredoxin-like protein 1 OS=Homo sapiens OX=9606 GN=TXNL1 PE=1 SV=3	Thioredoxin-like protein 1	TXNL1	Homo sapiens	1	4	4	4	4	3	3	2	4	4	4	3	3	2	4	4	4	3	3	2	4	4	2022-03-27	2022-03-27	2022-03-27	32.251	289	289	1955-03-01	4	3	3	2	4	4	0	35.014	By MS/MS	By MS/MS	By MS/MS
Q86V81	sp|Q86V81|THOC4_HUMAN	sp|Q86V81|THOC4_HUMAN	3	3	3	sp|Q86V81|THOC4_HUMAN THO complex subunit 4 OS=Homo sapiens OX=9606 GN=ALYREF PE=1 SV=3	THO complex subunit 4	ALYREF	Homo sapiens	1	3	3	3	3	3	3	3	3	3	3	3	3	3	3	3	3	3	3	3	3	3	2022-05-19	2022-05-19	2022-05-19	26.888	257	257	2022-05-03	3	3	3	3	3	3	0	18.583	By MS/MS	By MS/MS	By MS/MS
Q8IYQ7	sp|Q8IYQ7|THNS1_HUMAN	sp|Q8IYQ7|THNS1_HUMAN	2	2	2	sp|Q8IYQ7|THNS1_HUMAN Threonine synthase-like 1 OS=Homo sapiens OX=9606 GN=THNSL1 PE=1 SV=2	Threonine synthase-like 1	THNSL1	Homo sapiens	1	2	2	2	2	0	1	1	0	1	2	0	1	1	0	1	2	0	1	1	0	1	4	4	4	83.069	743	743	3	2		1	1		1	0	12.697	By MS/MS		By MS/MS
P26639	sp|P26639|SYTC_HUMAN	sp|P26639|SYTC_HUMAN	4	4	4	sp|P26639|SYTC_HUMAN Threonine--tRNA ligase 1, cytoplasmic OS=Homo sapiens OX=9606 GN=TARS1 PE=1 SV=3	Threonine--tRNA ligase 1, cytoplasmic	TARS1	Homo sapiens	1	4	4	4	4	4	4	3	3	3	4	4	4	3	3	3	4	4	4	3	3	3	2022-04-08	2022-04-08	2022-04-08	83.434	723	723	2029-03-01	4	4	4	3	3	3	0	23.937	By MS/MS	By MS/MS	By MS/MS
P04216	sp|P04216|THY1_HUMAN	sp|P04216|THY1_HUMAN	1	1	1	sp|P04216|THY1_HUMAN Thy-1 membrane glycoprotein OS=Homo sapiens OX=9606 GN=THY1 PE=1 SV=2	Thy-1 membrane glycoprotein	THY1	Homo sapiens	1	1	1	1	1	1	1	1	1	1	1	1	1	1	1	1	1	1	1	1	1	1	2022-07-08	2022-07-08	2022-07-08	17.935	161	161	2022-05-03	1	1	1	1	1	1	0	25.833	By MS/MS	By MS/MS	By MS/MS
Q95274	sp|Q95274|TYB4_PIG;sp|P62328|TYB4_HUMAN	sp|Q95274|TYB4_PIG;sp|P62328|TYB4_HUMAN	2;2	2;2	2;2	sp|Q95274|TYB4_PIG Thymosin beta-4 OS=Sus scrofa OX=9823 GN=TMSB4 PE=3 SV=3;sp|P62328|TYB4_HUMAN Thymosin beta-4 OS=Homo sapiens OX=9606 GN=TMSB4X PE=1 SV=2	Thymosin beta-4	TMSB4	Sus scrofa	2	2	2	2	2	2	2	2	2	2	2	2	2	2	2	2	2	2	2	2	2	2	2022-08-31	2022-08-31	2022-08-31	50.526	44	44;44	1971-03-01	3	3	3	4	4	4	0	19.561	By MS/MS	By MS/MS	By MS/MS
Q9H0E2	sp|Q9H0E2|TOLIP_HUMAN	sp|Q9H0E2|TOLIP_HUMAN	1	1	1	sp|Q9H0E2|TOLIP_HUMAN Toll-interacting protein OS=Homo sapiens OX=9606 GN=TOLLIP PE=1 SV=1	Toll-interacting protein	TOLLIP	Homo sapiens	1	1	1	1	1	1	1	1	1	1	1	1	1	1	1	1	1	1	1	1	1	1	2022-01-05	2022-01-05	2022-01-05	30.281	274	274	2022-05-03	1	1	1	1	1	1	0.0023474	7.776	By MS/MS	By MS/MS	By MS/MS
Q9TV69	sp|Q9TV69|DHDH_PIG;sp|Q9UQ10|DHDH_HUMAN	sp|Q9TV69|DHDH_PIG	3;1	3;1	3;1	sp|Q9TV69|DHDH_PIG Trans-1,2-dihydrobenzene-1,2-diol dehydrogenase OS=Sus scrofa OX=9823 GN=DHDH PE=1 SV=1	Trans-1,2-dihydrobenzene-1,2-diol dehydrogenase	DHDH	Sus scrofa	2	3	3	3	3	3	3	3	3	3	3	3	3	3	3	3	3	3	3	3	3	3	2022-02-12	2022-02-12	2022-02-12	36.527	335	335;334	2022-05-03	3	3	3	3	3	3	0	18.269	By MS/MS	By MS/MS	By MS/MS
P37837	sp|P37837|TALDO_HUMAN;sp|Q29593|TALDO_PIG	sp|P37837|TALDO_HUMAN	3;1	3;1	3;1	sp|P37837|TALDO_HUMAN Transaldolase OS=Homo sapiens OX=9606 GN=TALDO1 PE=1 SV=2	Transaldolase	TALDO1	Homo sapiens	2	3	3	3	3	3	3	3	3	3	3	3	3	3	3	3	3	3	3	3	3	3	2022-02-09	2022-02-09	2022-02-09	37.54	337	337;61	2022-05-03	3	3	3	3	3	3	0	17.654	By MS/MS	By MS/MS	By MS/MS
P23193	sp|P23193|TCEA1_HUMAN;sp|Q15560|TCEA2_HUMAN	sp|P23193|TCEA1_HUMAN;sp|Q15560|TCEA2_HUMAN	2;1	2;1	2;1	sp|P23193|TCEA1_HUMAN Transcription elongation factor A protein 1 OS=Homo sapiens OX=9606 GN=TCEA1 PE=1 SV=2;sp|Q15560|TCEA2_HUMAN Transcription elongation factor A protein 2 OS=Homo sapiens OX=9606 GN=TCEA2 PE=1 SV=1	Transcription elongation factor A protein 1	TCEA1	Homo sapiens	2	2	2	2	2	2	2	2	2	2	2	2	2	2	2	2	2	2	2	2	2	2	2022-03-08	2022-03-08	2022-03-08	33.969	301	301;299	2022-05-03	2	2	2	2	2	2	0	13.012	By MS/MS	By MS/MS	By MS/MS
Q5D144	sp|Q5D144|TFAM_PIG	sp|Q5D144|TFAM_PIG	1	1	1	sp|Q5D144|TFAM_PIG Transcription factor A, mitochondrial OS=Sus scrofa OX=9823 GN=TFAM PE=2 SV=1	Transcription factor A, mitochondrial	TFAM	Sus scrofa	1	1	1	1	1	1	1	1	1	0	1	1	1	1	1	0	1	1	1	1	1	0	2022-01-06	2022-01-06	2022-01-06	28.726	246	246	3	1	1	1	1	1		0.0034364	73.672	By MS/MS	By MS/MS	By MS/MS
P20290	sp|P20290|BTF3_HUMAN	sp|P20290|BTF3_HUMAN	1	1	1	sp|P20290|BTF3_HUMAN Transcription factor BTF3 OS=Homo sapiens OX=9606 GN=BTF3 PE=1 SV=1	Transcription factor BTF3	BTF3	Homo sapiens	1	1	1	1	1	1	1	1	0	0	1	1	1	1	0	0	1	1	1	1	0	0	2022-06-13	2022-06-13	2022-06-13	22.168	206	206	2022-05-02	1	1	1	1			0.0043337	67.867	By MS/MS	By MS/MS	By matching
Q13263	sp|Q13263|TIF1B_HUMAN	sp|Q13263|TIF1B_HUMAN	1	1	1	sp|Q13263|TIF1B_HUMAN Transcription intermediary factor 1-beta OS=Homo sapiens OX=9606 GN=TRIM28 PE=1 SV=5	Transcription intermediary factor 1-beta	TRIM28	Homo sapiens	1	1	1	1	1	1	1	1	1	0	1	1	1	1	1	0	1	1	1	1	1	0	2	2	2	88.549	835	835	3	1	1	2	1	1		0.007384	65.824	By MS/MS	By matching	By MS/MS
Q00577	sp|Q00577|PURA_HUMAN	sp|Q00577|PURA_HUMAN	3	3	3	sp|Q00577|PURA_HUMAN Transcriptional activator protein Pur-alpha OS=Homo sapiens OX=9606 GN=PURA PE=1 SV=2	Transcriptional activator protein Pur-alpha	PURA	Homo sapiens	1	3	3	3	2	1	2	2	2	2	2	1	2	2	2	2	2	1	2	2	2	2	2022-09-23	2022-09-23	2022-09-23	34.91	322	322	1959-03-01	3	2	3	3	3	3	0	27.175	By MS/MS	By MS/MS	By MS/MS
Q8HZV3	sp|Q8HZV3|TFR1_PIG	sp|Q8HZV3|TFR1_PIG	1	1	1	sp|Q8HZV3|TFR1_PIG Transferrin receptor protein 1 OS=Sus scrofa OX=9823 GN=TFRC PE=2 SV=1	Transferrin receptor protein 1	TFRC	Sus scrofa	1	1	1	1	1	1	1	1	1	0	1	1	1	1	1	0	1	1	1	1	1	0	2022-08-01	2022-08-01	2022-08-01	86.121	768	768	3	1	1	1	1	1		0.0033746	71.929	By matching	By matching	By MS/MS
P61586	sp|P61586|RHOA_HUMAN;sp|P08134|RHOC_HUMAN	sp|P61586|RHOA_HUMAN;sp|P08134|RHOC_HUMAN	2;2	2;2	1;1	sp|P61586|RHOA_HUMAN Transforming protein RhoA OS=Homo sapiens OX=9606 GN=RHOA PE=1 SV=1;sp|P08134|RHOC_HUMAN Rho-related GTP-binding protein RhoC OS=Homo sapiens OX=9606 GN=RHOC PE=1 SV=1	Transforming protein RhoA	RHOA	Homo sapiens	2	2	2	1	2	2	2	2	2	2	2	2	2	2	2	2	1	1	1	1	1	1	2022-01-16	2022-01-16	2022-03-07	21.768	193	193;193	2022-05-03	2	2	2	2	2	2	0	14.924	By MS/MS	By MS/MS	By MS/MS
Q01995	sp|Q01995|TAGL_HUMAN	sp|Q01995|TAGL_HUMAN	3	3	3	sp|Q01995|TAGL_HUMAN Transgelin OS=Homo sapiens OX=9606 GN=TAGLN PE=1 SV=4	Transgelin	TAGLN	Homo sapiens	1	3	3	3	1	3	3	2	2	2	1	3	3	2	2	2	1	3	3	2	2	2	2022-09-20	2022-09-20	2022-09-20	22.611	201	201	1954-03-01	1	3	3	2	2	2	0	19.325	By MS/MS	By MS/MS	By MS/MS
Q9UI15	sp|Q9UI15|TAGL3_HUMAN	sp|Q9UI15|TAGL3_HUMAN	4	4	4	sp|Q9UI15|TAGL3_HUMAN Transgelin-3 OS=Homo sapiens OX=9606 GN=TAGLN3 PE=1 SV=2	Transgelin-3	TAGLN3	Homo sapiens	1	4	4	4	4	4	4	4	4	4	4	4	4	4	4	4	4	4	4	4	4	4	2022-07-30	2022-07-30	2022-07-30	22.472	199	199	2022-06-03	4	4	4	4	4	5	0	110.4	By MS/MS	By MS/MS	By MS/MS
P03974	sp|P03974|TERA_PIG	sp|P03974|TERA_PIG	19	1	1	sp|P03974|TERA_PIG Transitional endoplasmic reticulum ATPase OS=Sus scrofa OX=9823 GN=VCP PE=1 SV=5	Transitional endoplasmic reticulum ATPase	VCP	Sus scrofa	1	19	1	1	18	18	18	18	19	19	1	1	1	1	1	1	1	1	1	1	1	1	39.7	2	2	89.288	806	806	2022-05-03	1	1	1	1	1	1	0	26.41	By MS/MS	By MS/MS	By MS/MS
P55072	sp|P55072|TERA_HUMAN	sp|P55072|TERA_HUMAN	19	19	1	sp|P55072|TERA_HUMAN Transitional endoplasmic reticulum ATPase OS=Homo sapiens OX=9606 GN=VCP PE=1 SV=4	Transitional endoplasmic reticulum ATPase	VCP	Homo sapiens	1	19	19	1	18	18	18	18	19	19	18	18	18	18	19	19	1	1	1	1	1	1	39.6	39.6	2022-09-01	89.321	806	806	1947-03-01	20	19	19	18	19	19	0	323.31	By MS/MS	By MS/MS	By MS/MS
P29401	sp|P29401|TKT_HUMAN	sp|P29401|TKT_HUMAN	7	7	7	sp|P29401|TKT_HUMAN Transketolase OS=Homo sapiens OX=9606 GN=TKT PE=1 SV=3	Transketolase	TKT	Homo sapiens	1	7	7	7	7	7	7	7	7	7	7	7	7	7	7	7	7	7	7	7	7	7	2022-06-15	2022-06-15	2022-06-15	67.877	623	623	1953-03-01	9	9	9	9	10	9	0	69.866	By MS/MS	By MS/MS	By MS/MS
P61288	sp|P61288|TCTP_PIG;sp|P13693|TCTP_HUMAN	sp|P61288|TCTP_PIG;sp|P13693|TCTP_HUMAN	1;1	1;1	1;1	sp|P61288|TCTP_PIG Translationally-controlled tumor protein OS=Sus scrofa OX=9823 GN=TPT1 PE=2 SV=1;sp|P13693|TCTP_HUMAN Translationally-controlled tumor protein OS=Homo sapiens OX=9606 GN=TPT1 PE=1 SV=1	Translationally-controlled tumor protein	TPT1	Sus scrofa	2	1	1	1	1	1	1	1	1	1	1	1	1	1	1	1	1	1	1	1	1	1	2022-06-07	2022-06-07	2022-06-07	19.595	172	172;172	2022-05-03	1	1	1	1	1	1	0.0025284	10.462	By MS/MS	By MS/MS	By MS/MS
Q15631	sp|Q15631|TSN_HUMAN	sp|Q15631|TSN_HUMAN	2	2	2	sp|Q15631|TSN_HUMAN Translin OS=Homo sapiens OX=9606 GN=TSN PE=1 SV=1	Translin	TSN	Homo sapiens	1	2	2	2	2	2	2	2	2	2	2	2	2	2	2	2	2	2	2	2	2	2	14	14	14	26.183	228	228	2022-05-03	2	2	2	2	2	2	0	12.755	By MS/MS	By MS/MS	By MS/MS
Q15363	sp|Q15363|TMED2_HUMAN	sp|Q15363|TMED2_HUMAN	2	2	2	sp|Q15363|TMED2_HUMAN Transmembrane emp24 domain-containing protein 2 OS=Homo sapiens OX=9606 GN=TMED2 PE=1 SV=1	Transmembrane emp24 domain-containing protein 2	TMED2	Homo sapiens	1	2	2	2	2	2	2	2	1	1	2	2	2	2	1	1	2	2	2	2	1	1	2022-04-12	2022-04-12	2022-04-12	22.761	201	201	2022-01-03	2	2	2	2	1	1	0	15.252	By MS/MS	By MS/MS	By MS/MS
Q9BVK6	sp|Q9BVK6|TMED9_HUMAN	sp|Q9BVK6|TMED9_HUMAN	2	2	1	sp|Q9BVK6|TMED9_HUMAN Transmembrane emp24 domain-containing protein 9 OS=Homo sapiens OX=9606 GN=TMED9 PE=1 SV=2	Transmembrane emp24 domain-containing protein 9	TMED9	Homo sapiens	1	2	2	1	2	2	1	1	1	1	2	2	1	1	1	1	1	1	1	1	1	1	2022-09-11	2022-09-11	2022-07-04	27.277	235	235	3	2	2	1	1	1	1	0	12.129	By MS/MS	By MS/MS	By MS/MS
Q92973	sp|Q92973|TNPO1_HUMAN	sp|Q92973|TNPO1_HUMAN	3	3	3	sp|Q92973|TNPO1_HUMAN Transportin-1 OS=Homo sapiens OX=9606 GN=TNPO1 PE=1 SV=2	Transportin-1	TNPO1	Homo sapiens	1	3	3	3	3	3	3	2	2	2	3	3	3	2	2	2	3	3	3	2	2	2	2022-06-04	2022-06-04	2022-06-04	102.35	898	898	2022-02-03	3	3	3	2	2	2	0	17.382	By MS/MS	By MS/MS	By MS/MS
Q29554	sp|Q29554|ECHA_PIG	sp|Q29554|ECHA_PIG	3	3	3	sp|Q29554|ECHA_PIG Trifunctional enzyme subunit alpha, mitochondrial OS=Sus scrofa OX=9823 GN=HADHA PE=2 SV=1	Trifunctional enzyme subunit alpha, mitochondrial	HADHA	Sus scrofa	1	3	3	3	2	2	3	3	3	3	2	2	3	3	3	3	2	2	3	3	3	3	2022-02-06	2022-02-06	2022-02-06	83.106	763	763	1975-03-01	2	2	3	3	3	3	0	59.068	By MS/MS	By MS/MS	By MS/MS
F1RKQ4	sp|F1RKQ4|TKFC_PIG;sp|Q3LXA3|TKFC_HUMAN	sp|F1RKQ4|TKFC_PIG	10;2	10;2	10;2	sp|F1RKQ4|TKFC_PIG Triokinase/FMN cyclase OS=Sus scrofa OX=9823 GN=TKFC PE=1 SV=2	Triokinase/FMN cyclase	TKFC	Sus scrofa	2	10	10	10	10	10	10	10	8	9	10	10	10	10	8	9	10	10	10	10	8	9	32.3	32.3	32.3	59.234	579	579;575	2022-04-03	10	10	10	10	8	9	0	82.299	By MS/MS	By MS/MS	By MS/MS
P60174	sp|P60174|TPIS_HUMAN	sp|P60174|TPIS_HUMAN	9	1	1	sp|P60174|TPIS_HUMAN Triosephosphate isomerase OS=Homo sapiens OX=9606 GN=TPI1 PE=1 SV=4	Triosephosphate isomerase	TPI1	Homo sapiens	1	9	1	1	9	9	9	9	9	9	1	1	1	1	1	1	1	1	1	1	1	1	47.8	2022-06-11	2022-06-11	26.669	249	249	1953-03-01	2	4	4	3	3	3	0.0025189	10.127	By MS/MS	By MS/MS	By MS/MS
Q29371	sp|Q29371|TPIS_PIG	sp|Q29371|TPIS_PIG	12	12	4	sp|Q29371|TPIS_PIG Triosephosphate isomerase OS=Sus scrofa OX=9823 GN=TPI1 PE=2 SV=4	Triosephosphate isomerase	TPI1	Sus scrofa	1	12	12	4	12	12	12	12	12	12	12	12	12	12	12	12	4	4	4	4	4	4	56	56	2022-08-19	26.729	248	248	1951-03-01	17	17	17	17	18	17	0	323.31	By MS/MS	By MS/MS	By MS/MS
Q9NZR1	sp|Q9NZR1|TMOD2_HUMAN	sp|Q9NZR1|TMOD2_HUMAN	1	1	1	sp|Q9NZR1|TMOD2_HUMAN Tropomodulin-2 OS=Homo sapiens OX=9606 GN=TMOD2 PE=1 SV=1	Tropomodulin-2	TMOD2	Homo sapiens	1	1	1	1	1	1	1	1	1	1	1	1	1	1	1	1	1	1	1	1	1	1	2022-03-04	2022-03-04	2022-03-04	39.595	351	351	2022-05-03	1	1	1	1	1	1	0.0023283	76.491	By matching	By MS/MS	By MS/MS
P42639	sp|P42639|TPM1_PIG;sp|P09493|TPM1_HUMAN	sp|P42639|TPM1_PIG;sp|P09493|TPM1_HUMAN	3;3	2;2	1;1	sp|P42639|TPM1_PIG Tropomyosin alpha-1 chain OS=Sus scrofa OX=9823 GN=TPM1 PE=1 SV=2;sp|P09493|TPM1_HUMAN Tropomyosin alpha-1 chain OS=Homo sapiens OX=9606 GN=TPM1 PE=1 SV=2	Tropomyosin alpha-1 chain	TPM1	Sus scrofa	2	3	2	1	2	2	2	2	2	3	1	1	1	1	1	2	0	0	0	0	0	1	2022-03-11	2022-07-07	2022-02-03	32.706	284	284;284	1986-03-01	1	1	1	1	1	2	0	19.801	By MS/MS	By MS/MS	By MS/MS
A1XQV4	sp|A1XQV4|TPM3_PIG;sp|P06753|TPM3_HUMAN	sp|A1XQV4|TPM3_PIG;sp|P06753|TPM3_HUMAN	3;3	2;2	2;2	sp|A1XQV4|TPM3_PIG Tropomyosin alpha-3 chain OS=Sus scrofa OX=9823 GN=TPM3 PE=2 SV=1;sp|P06753|TPM3_HUMAN Tropomyosin alpha-3 chain OS=Homo sapiens OX=9606 GN=TPM3 PE=1 SV=2	Tropomyosin alpha-3 chain	TPM3	Sus scrofa	2	3	2	2	3	3	3	3	3	3	2	2	2	2	2	2	2	2	2	2	2	2	2022-03-11	2022-07-07	2022-07-07	33.058	284	284;285	2025-03-01	3	3	3	3	2	2	0	11.836	By MS/MS	By MS/MS	By MS/MS
P67937	sp|P67937|TPM4_PIG;sp|P67936|TPM4_HUMAN	sp|P67937|TPM4_PIG;sp|P67936|TPM4_HUMAN	4;4	4;4	2;2	sp|P67937|TPM4_PIG Tropomyosin alpha-4 chain OS=Sus scrofa OX=9823 GN=TPM4 PE=2 SV=3;sp|P67936|TPM4_HUMAN Tropomyosin alpha-4 chain OS=Homo sapiens OX=9606 GN=TPM4 PE=1 SV=3	Tropomyosin alpha-4 chain	TPM4	Sus scrofa	2	4	4	2	3	4	4	4	3	3	3	4	4	4	3	3	1	2	2	2	1	1	2022-08-21	2022-08-21	2022-07-13	28.521	248	248;248	1943-03-01	3	4	4	4	3	3	0	36.102	By MS/MS	By MS/MS	By MS/MS
Q15714	sp|Q15714|T22D1_HUMAN	sp|Q15714|T22D1_HUMAN	1	1	1	sp|Q15714|T22D1_HUMAN TSC22 domain family protein 1 OS=Homo sapiens OX=9606 GN=TSC22D1 PE=1 SV=3	TSC22 domain family protein 1	TSC22D1	Homo sapiens	1	1	1	1	1	1	1	1	1	1	1	1	1	1	1	1	1	1	1	1	1	1	2022-01-01	2022-01-01	2022-01-01	109.68	1073	1073	2022-05-03	1	1	1	1	1	1	0.0023337	7.654	By MS/MS	By MS/MS	By MS/MS
A6NHL2	sp|A6NHL2|TBAL3_HUMAN	sp|A6NHL2|TBAL3_HUMAN	1	1	1	sp|A6NHL2|TBAL3_HUMAN Tubulin alpha chain-like 3 OS=Homo sapiens OX=9606 GN=TUBAL3 PE=1 SV=2	Tubulin alpha chain-like 3	TUBAL3	Homo sapiens	1	1	1	1	1	1	1	1	1	1	1	1	1	1	1	1	1	1	1	1	1	1	2022-08-03	2022-08-03	2022-08-03	49.908	446	446	1973-03-01	1	2	2	2	2	2	0.0012903	11.247	By MS/MS	By MS/MS	By MS/MS
Q71U36	sp|Q71U36|TBA1A_HUMAN;sp|P0DPH8|TBA3D_HUMAN;sp|P0DPH7|TBA3C_HUMAN;sp|Q6PEY2|TBA3E_HUMAN	sp|Q71U36|TBA1A_HUMAN;sp|P0DPH8|TBA3D_HUMAN;sp|P0DPH7|TBA3C_HUMAN;sp|Q6PEY2|TBA3E_HUMAN	17;14;14;13	2;2;2;2	0;0;0;0	sp|Q71U36|TBA1A_HUMAN Tubulin alpha-1A chain OS=Homo sapiens OX=9606 GN=TUBA1A PE=1 SV=1;sp|P0DPH8|TBA3D_HUMAN Tubulin alpha-3D chain OS=Homo sapiens OX=9606 GN=TUBA3D PE=1 SV=1;sp|P0DPH7|TBA3C_HUMAN Tubulin alpha-3C chain OS=Homo sapiens OX=9606 GN=TUBA3C	Tubulin alpha-1A chain	TUBA1A	Homo sapiens	4	17	2	0	16	15	15	16	15	15	2	2	2	2	2	2	0	0	0	0	0	0	65	6	0	50.135	451	451;450;450;450	2022-05-03	2	2	2	2	2	2	0	83.597	By MS/MS	By MS/MS	By MS/MS
P68363	sp|P68363|TBA1B_HUMAN;sp|Q2XVP4|TBA1B_PIG;sp|Q9H853|TBA4B_HUMAN	sp|P68363|TBA1B_HUMAN;sp|Q2XVP4|TBA1B_PIG	17;17;2	17;17;2	0;0;0	sp|P68363|TBA1B_HUMAN Tubulin alpha-1B chain OS=Homo sapiens OX=9606 GN=TUBA1B PE=1 SV=1;sp|Q2XVP4|TBA1B_PIG Tubulin alpha-1B chain OS=Sus scrofa OX=9823 GN=TUBA1B PE=1 SV=1	Tubulin alpha-1B chain	TUBA1B	Homo sapiens	3	17	17	0	16	15	15	16	15	15	16	15	15	16	15	15	0	0	0	0	0	0	65	65	0	50.151	451	451;451;241	1956-03-01	46	50	50	50	51	53	0	323.31	By MS/MS	By MS/MS	By MS/MS
P68366	sp|P68366|TBA4A_HUMAN	sp|P68366|TBA4A_HUMAN	13	2	2	sp|P68366|TBA4A_HUMAN Tubulin alpha-4A chain OS=Homo sapiens OX=9606 GN=TUBA4A PE=1 SV=1	Tubulin alpha-4A chain	TUBA4A	Homo sapiens	1	13	2	2	13	13	13	13	13	13	2	2	2	2	2	2	2	2	2	2	2	2	45.5	2022-08-07	2022-08-07	49.924	448	448	2022-05-03	2	2	2	2	2	2	0	63.629	By MS/MS	By MS/MS	By MS/MS
P02554	sp|P02554|TBB_PIG;sp|A6NNZ2|TBB8B_HUMAN;sp|Q9H4B7|TBB1_HUMAN;CON__ENSEMBL:ENSBTAP00000025008	sp|P02554|TBB_PIG	18;3;2;2	5;0;0;0	0;0;0;0	sp|P02554|TBB_PIG Tubulin beta chain OS=Sus scrofa OX=9823 PE=1 SV=1	Tubulin beta chain		Sus scrofa	4	18	5	0	17	18	17	18	17	17	5	5	4	5	5	5	0	0	0	0	0	0	61.1	2022-06-19	0	49.86	445	445;444;451;536	1949-03-01	9	10	8	10	9	9	0	160.84	By MS/MS	By MS/MS	By MS/MS
Q767L7	sp|Q767L7|TBB5_PIG;sp|P07437|TBB5_HUMAN	sp|Q767L7|TBB5_PIG;sp|P07437|TBB5_HUMAN	16;16	4;4	4;4	sp|Q767L7|TBB5_PIG Tubulin beta chain OS=Sus scrofa OX=9823 GN=TUBB PE=2 SV=1;sp|P07437|TBB5_HUMAN Tubulin beta chain OS=Homo sapiens OX=9606 GN=TUBB PE=1 SV=2	Tubulin beta chain	TUBB	Sus scrofa	2	16	4	4	15	16	16	16	16	16	3	4	4	4	4	4	3	4	4	4	4	4	53.8	16	16	49.67	444	444;444	2022-07-03	6	6	7	9	8	8	0	120.57	By MS/MS	By MS/MS	By MS/MS
Q13885	sp|Q13885|TBB2A_HUMAN	sp|Q13885|TBB2A_HUMAN	17	2	0	sp|Q13885|TBB2A_HUMAN Tubulin beta-2A chain OS=Homo sapiens OX=9606 GN=TUBB2A PE=1 SV=1	Tubulin beta-2A chain	TUBB2A	Homo sapiens	1	17	2	0	16	17	16	17	16	16	2	2	2	2	2	2	0	0	0	0	0	0	59.1	2022-01-06	0	49.906	445	445	2022-05-03	3	4	4	4	4	3	0	131.2	By MS/MS	By MS/MS	By MS/MS
Q9BVA1	sp|Q9BVA1|TBB2B_HUMAN	sp|Q9BVA1|TBB2B_HUMAN	17	1	1	sp|Q9BVA1|TBB2B_HUMAN Tubulin beta-2B chain OS=Homo sapiens OX=9606 GN=TUBB2B PE=1 SV=1	Tubulin beta-2B chain	TUBB2B	Homo sapiens	1	17	1	1	16	17	16	17	16	16	1	1	1	1	1	1	1	1	1	1	1	1	59.1	2022-07-02	2022-07-02	49.953	445	445	2022-05-03	1	1	1	1	1	1	0	13.938	By MS/MS	By matching	By MS/MS
Q13509	sp|Q13509|TBB3_HUMAN	sp|Q13509|TBB3_HUMAN	16	9	8	sp|Q13509|TBB3_HUMAN Tubulin beta-3 chain OS=Homo sapiens OX=9606 GN=TUBB3 PE=1 SV=2	Tubulin beta-3 chain	TUBB3	Homo sapiens	1	16	9	8	16	16	16	15	14	14	9	9	9	8	7	7	8	8	8	7	6	6	52.7	2022-08-31	2022-01-29	50.432	450	450	1932-03-01	9	9	10	8	7	7	0	76.722	By MS/MS	By MS/MS	By MS/MS
P04350	sp|P04350|TBB4A_HUMAN	sp|P04350|TBB4A_HUMAN	17	4	3	sp|P04350|TBB4A_HUMAN Tubulin beta-4A chain OS=Homo sapiens OX=9606 GN=TUBB4A PE=1 SV=2	Tubulin beta-4A chain	TUBB4A	Homo sapiens	1	17	4	3	15	16	16	14	15	15	3	4	3	2	3	3	3	3	3	2	3	3	57	2022-02-14	2022-01-10	49.585	444	444	1953-03-01	3	4	3	2	3	4	0	32.725	By MS/MS	By MS/MS	By MS/MS
P68371	sp|P68371|TBB4B_HUMAN	sp|P68371|TBB4B_HUMAN	18	18	1	sp|P68371|TBB4B_HUMAN Tubulin beta-4B chain OS=Homo sapiens OX=9606 GN=TUBB4B PE=1 SV=1	Tubulin beta-4B chain	TUBB4B	Homo sapiens	1	18	18	1	16	17	18	17	16	16	16	17	18	17	16	16	1	1	1	1	1	1	57.8	57.8	2022-07-02	49.83	445	445	1959-03-01	36	36	38	37	38	43	0	323.31	By MS/MS	By MS/MS	By MS/MS
Q3ZCM7	sp|Q3ZCM7|TBB8_HUMAN	sp|Q3ZCM7|TBB8_HUMAN	6	2	2	sp|Q3ZCM7|TBB8_HUMAN Tubulin beta-8 chain OS=Homo sapiens OX=9606 GN=TUBB8 PE=1 SV=2	Tubulin beta-8 chain	TUBB8	Homo sapiens	1	6	2	2	6	6	6	6	6	6	2	2	2	2	2	2	2	2	2	2	2	2	2022-09-16	2022-04-07	2022-04-07	49.775	444	444	2022-05-03	2	2	2	2	2	2	0	22.608	By MS/MS	By MS/MS	By MS/MS
Q99426	sp|Q99426|TBCB_HUMAN	sp|Q99426|TBCB_HUMAN	1	1	1	sp|Q99426|TBCB_HUMAN Tubulin-folding cofactor B OS=Homo sapiens OX=9606 GN=TBCB PE=1 SV=2	Tubulin-folding cofactor B	TBCB	Homo sapiens	1	1	1	1	1	1	1	0	0	0	1	1	1	0	0	0	1	1	1	0	0	0	2022-04-07	2022-04-07	2022-04-07	27.325	244	244	2	1	1	1				0.0033708	71.858	By matching	By matching	By MS/MS
P08138	sp|P08138|TNR16_HUMAN	sp|P08138|TNR16_HUMAN	5	5	5	sp|P08138|TNR16_HUMAN Tumor necrosis factor receptor superfamily member 16 OS=Homo sapiens OX=9606 GN=NGFR PE=1 SV=1	Tumor necrosis factor receptor superfamily member 16	NGFR	Homo sapiens	1	5	5	5	3	3	3	3	4	2	3	3	3	3	4	2	3	3	3	3	4	2	2022-09-26	2022-09-26	2022-09-26	45.183	427	427	1938-03-01	4	3	4	3	5	2	0	35.887	By MS/MS	By MS/MS	By MS/MS
P55327	sp|P55327|TPD52_HUMAN	sp|P55327|TPD52_HUMAN	2	2	2	sp|P55327|TPD52_HUMAN Tumor protein D52 OS=Homo sapiens OX=9606 GN=TPD52 PE=1 SV=2	Tumor protein D52	TPD52	Homo sapiens	1	2	2	2	2	2	2	2	2	2	2	2	2	2	2	2	2	2	2	2	2	2	2022-01-12	2022-01-12	2022-01-12	24.327	224	224	2022-05-03	2	2	2	2	2	2	0	13.743	By MS/MS	By MS/MS	By MS/MS
Q12792	sp|Q12792|TWF1_HUMAN	sp|Q12792|TWF1_HUMAN	1	1	1	sp|Q12792|TWF1_HUMAN Twinfilin-1 OS=Homo sapiens OX=9606 GN=TWF1 PE=1 SV=3	Twinfilin-1	TWF1	Homo sapiens	1	1	1	1	1	1	1	1	1	1	1	1	1	1	1	1	1	1	1	1	1	1	2022-07-03	2022-07-03	2022-07-03	40.282	350	350	2022-05-03	1	1	1	1	1	1	0	15.471	By matching	By MS/MS	By MS/MS
P09234	sp|P09234|RU1C_HUMAN	sp|P09234|RU1C_HUMAN	1	1	1	sp|P09234|RU1C_HUMAN U1 small nuclear ribonucleoprotein C OS=Homo sapiens OX=9606 GN=SNRPC PE=1 SV=1	U1 small nuclear ribonucleoprotein C	SNRPC	Homo sapiens	1	1	1	1	1	1	1	1	1	1	1	1	1	1	1	1	1	1	1	1	1	1	2022-03-11	2022-03-11	2022-03-11	17.394	159	159	2022-05-03	1	1	1	1	1	1	0.0043197	67.528	By MS/MS	By MS/MS	By MS/MS
Q9Y333	sp|Q9Y333|LSM2_HUMAN	sp|Q9Y333|LSM2_HUMAN	2	2	2	sp|Q9Y333|LSM2_HUMAN U6 snRNA-associated Sm-like protein LSm2 OS=Homo sapiens OX=9606 GN=LSM2 PE=1 SV=1	U6 snRNA-associated Sm-like protein LSm2	LSM2	Homo sapiens	1	2	2	2	2	2	2	2	2	2	2	2	2	2	2	2	2	2	2	2	2	2	40	40	40	10.834	95	95	2022-05-03	2	2	2	2	2	2	0	15.37	By MS/MS	By MS/MS	By MS/MS
P54578	sp|P54578|UBP14_HUMAN	sp|P54578|UBP14_HUMAN	1	1	1	sp|P54578|UBP14_HUMAN Ubiquitin carboxyl-terminal hydrolase 14 OS=Homo sapiens OX=9606 GN=USP14 PE=1 SV=3	Ubiquitin carboxyl-terminal hydrolase 14	USP14	Homo sapiens	1	1	1	1	1	1	1	1	1	1	1	1	1	1	1	1	1	1	1	1	1	1	2022-02-02	2022-02-02	2022-02-02	56.068	494	494	2022-05-03	1	1	1	1	1	1	0.0043621	68.327	By matching	By matching	By matching
P45974	sp|P45974|UBP5_HUMAN	sp|P45974|UBP5_HUMAN	2	2	2	sp|P45974|UBP5_HUMAN Ubiquitin carboxyl-terminal hydrolase 5 OS=Homo sapiens OX=9606 GN=USP5 PE=1 SV=2	Ubiquitin carboxyl-terminal hydrolase 5	USP5	Homo sapiens	1	2	2	2	2	2	2	2	1	2	2	2	2	2	1	2	2	2	2	2	1	2	2022-01-04	2022-01-04	2022-01-04	95.785	858	858	1933-03-01	2	2	3	2	1	2	0	15.415	By MS/MS	By MS/MS	By MS/MS
Q93009	sp|Q93009|UBP7_HUMAN	sp|Q93009|UBP7_HUMAN	3	3	3	sp|Q93009|UBP7_HUMAN Ubiquitin carboxyl-terminal hydrolase 7 OS=Homo sapiens OX=9606 GN=USP7 PE=1 SV=2	Ubiquitin carboxyl-terminal hydrolase 7	USP7	Homo sapiens	1	3	3	3	3	3	3	2	2	2	3	3	3	2	2	2	3	3	3	2	2	2	2022-06-05	2022-06-05	2022-06-05	128.3	1102	1102	2022-12-03	3	4	3	2	2	2	0	17.301	By MS/MS	By MS/MS	By MS/MS
Q6SEG5	sp|Q6SEG5|UCHL1_PIG;sp|P09936|UCHL1_HUMAN	sp|Q6SEG5|UCHL1_PIG;sp|P09936|UCHL1_HUMAN	5;3	5;3	5;3	sp|Q6SEG5|UCHL1_PIG Ubiquitin carboxyl-terminal hydrolase isozyme L1 OS=Sus scrofa OX=9823 GN=UCHL1 PE=2 SV=1;sp|P09936|UCHL1_HUMAN Ubiquitin carboxyl-terminal hydrolase isozyme L1 OS=Homo sapiens OX=9606 GN=UCHL1 PE=1 SV=2	Ubiquitin carboxyl-terminal hydrolase isozyme L1	UCHL1	Sus scrofa	2	5	5	5	4	5	4	5	4	5	4	5	4	5	4	5	4	5	4	5	4	5	41.3	41.3	41.3	24.859	223	223;223	1949-03-01	8	10	8	8	8	9	0	92.309	By MS/MS	By MS/MS	By MS/MS
Q96FW1	sp|Q96FW1|OTUB1_HUMAN	sp|Q96FW1|OTUB1_HUMAN	4	4	4	sp|Q96FW1|OTUB1_HUMAN Ubiquitin thioesterase OTUB1 OS=Homo sapiens OX=9606 GN=OTUB1 PE=1 SV=2	Ubiquitin thioesterase OTUB1	OTUB1	Homo sapiens	1	4	4	4	2	4	4	3	3	3	2	4	4	3	3	3	2	4	4	3	3	3	2022-02-19	2022-02-19	2022-02-19	31.284	271	271	1953-03-01	2	4	4	3	3	3	0	31.908	By MS/MS	By MS/MS	By MS/MS
P63053	sp|P63053|RL40_PIG;sp|P62987|RL40_HUMAN;sp|P62979|RS27A_HUMAN;sp|P0CG47|UBB_HUMAN;sp|P0CG68|UBC_PIG;sp|P0CG48|UBC_HUMAN	sp|P63053|RL40_PIG;sp|P62987|RL40_HUMAN;sp|P62979|RS27A_HUMAN;sp|P0CG47|UBB_HUMAN;sp|P0CG68|UBC_PIG;sp|P0CG48|UBC_HUMAN	3;3;3;3;3;3	3;3;3;3;3;3	3;3;3;3;3;3	sp|P63053|RL40_PIG Ubiquitin-60S ribosomal protein L40 OS=Sus scrofa OX=9823 GN=UBA52 PE=1 SV=2;sp|P62987|RL40_HUMAN Ubiquitin-60S ribosomal protein L40 OS=Homo sapiens OX=9606 GN=UBA52 PE=1 SV=2;sp|P62979|RS27A_HUMAN Ubiquitin-40S ribosomal protein S27a O	Ubiquitin-60S ribosomal protein L40	UBA52	Sus scrofa	6	3	3	3	3	3	3	3	3	3	3	3	3	3	3	3	3	3	3	3	3	3	2022-06-26	2022-06-26	2022-06-26	14.728	128	128;128;156;229;533;685	2029-03-01	4	4	4	3	3	3	0	206.22	By MS/MS	By MS/MS	By MS/MS
P68036	sp|P68036|UB2L3_HUMAN;sp|A0A1B0GUS4|UB2L5_HUMAN	sp|P68036|UB2L3_HUMAN;sp|A0A1B0GUS4|UB2L5_HUMAN	1;1	1;1	1;1	sp|P68036|UB2L3_HUMAN Ubiquitin-conjugating enzyme E2 L3 OS=Homo sapiens OX=9606 GN=UBE2L3 PE=1 SV=1;sp|A0A1B0GUS4|UB2L5_HUMAN Ubiquitin-conjugating enzyme E2 L5 OS=Homo sapiens OX=9606 GN=UBE2L5 PE=2 SV=1	Ubiquitin-conjugating enzyme E2 L3	UBE2L3	Homo sapiens	2	1	1	1	1	1	1	1	1	1	1	1	1	1	1	1	1	1	1	1	1	1	2022-03-14	2022-03-14	2022-03-14	17.861	154	154;154	2022-05-03	1	1	1	1	1	1	0.0034325	73.672	By MS/MS	By MS/MS	By MS/MS
P61088	sp|P61088|UBE2N_HUMAN;sp|Q5JXB2|UE2NL_HUMAN	sp|P61088|UBE2N_HUMAN	3;1	3;1	3;1	sp|P61088|UBE2N_HUMAN Ubiquitin-conjugating enzyme E2 N OS=Homo sapiens OX=9606 GN=UBE2N PE=1 SV=1	Ubiquitin-conjugating enzyme E2 N	UBE2N	Homo sapiens	2	3	3	3	3	3	3	3	3	3	3	3	3	3	3	3	3	3	3	3	3	3	2022-03-30	2022-03-30	2022-03-30	17.138	152	152;153	2022-05-03	5	5	5	5	5	5	0	36.256	By MS/MS	By MS/MS	By MS/MS
Q13404	sp|Q13404|UB2V1_HUMAN	sp|Q13404|UB2V1_HUMAN	4	4	3	sp|Q13404|UB2V1_HUMAN Ubiquitin-conjugating enzyme E2 variant 1 OS=Homo sapiens OX=9606 GN=UBE2V1 PE=1 SV=2	Ubiquitin-conjugating enzyme E2 variant 1	UBE2V1	Homo sapiens	1	4	4	3	2	4	3	3	3	3	2	4	3	3	3	3	1	3	2	2	2	2	2022-09-29	2022-09-29	2022-01-23	16.495	147	147	1956-03-01	2	4	3	3	3	3	0	31.612	By MS/MS	By MS/MS	By MS/MS
P22314	sp|P22314|UBA1_HUMAN	sp|P22314|UBA1_HUMAN	13	13	13	sp|P22314|UBA1_HUMAN Ubiquitin-like modifier-activating enzyme 1 OS=Homo sapiens OX=9606 GN=UBA1 PE=1 SV=3	Ubiquitin-like modifier-activating enzyme 1	UBA1	Homo sapiens	1	13	13	13	13	13	13	11	12	12	13	13	13	11	12	12	13	13	13	11	12	12	2022-03-19	2022-03-19	2022-03-19	117.85	1058	1058	1939-03-01	15	15	15	12	13	13	0	160.2	By MS/MS	By MS/MS	By MS/MS
O94888	sp|O94888|UBXN7_HUMAN	sp|O94888|UBXN7_HUMAN	2	2	2	sp|O94888|UBXN7_HUMAN UBX domain-containing protein 7 OS=Homo sapiens OX=9606 GN=UBXN7 PE=1 SV=2	UBX domain-containing protein 7	UBXN7	Homo sapiens	1	2	2	2	1	2	2	2	2	2	1	2	2	2	2	2	1	2	2	2	2	2	2022-07-05	2022-07-05	2022-07-05	54.862	489	489	1973-03-01	1	2	2	2	2	2	0.0012953	11.285	By MS/MS	By MS/MS	By MS/MS
Q9NYU2	sp|Q9NYU2|UGGG1_HUMAN	sp|Q9NYU2|UGGG1_HUMAN	3	3	3	sp|Q9NYU2|UGGG1_HUMAN UDP-glucose:glycoprotein glucosyltransferase 1 OS=Homo sapiens OX=9606 GN=UGGT1 PE=1 SV=3	UDP-glucose:glycoprotein glucosyltransferase 1	UGGT1	Homo sapiens	1	3	3	3	2	3	1	1	1	1	2	3	1	1	1	1	2	3	1	1	1	1	2022-09-03	2022-09-03	2022-09-03	177.19	1555	1555	1989-02-01	2	3	1	1	1	1	0	18.808	By MS/MS	By MS/MS	By MS/MS
Q29561	sp|Q29561|KCY_PIG;sp|P30085|KCY_HUMAN	sp|Q29561|KCY_PIG;sp|P30085|KCY_HUMAN	2;2	2;2	2;2	sp|Q29561|KCY_PIG UMP-CMP kinase OS=Sus scrofa OX=9823 GN=CMPK1 PE=1 SV=1;sp|P30085|KCY_HUMAN UMP-CMP kinase OS=Homo sapiens OX=9606 GN=CMPK1 PE=1 SV=3	UMP-CMP kinase	CMPK1	Sus scrofa	2	2	2	2	1	2	1	1	1	1	1	2	1	1	1	1	1	2	1	1	1	1	2022-07-11	2022-07-11	2022-07-11	22.279	196	196;196	2029-03-01	1	2	1	1	1	1	0	11.632	By MS/MS	By MS/MS	By MS/MS
Q29122	sp|Q29122|MYO6_PIG;sp|Q9UM54|MYO6_HUMAN	sp|Q29122|MYO6_PIG;sp|Q9UM54|MYO6_HUMAN	4;3	4;3	4;3	sp|Q29122|MYO6_PIG Unconventional myosin-VI OS=Sus scrofa OX=9823 GN=MYO6 PE=1 SV=1;sp|Q9UM54|MYO6_HUMAN Unconventional myosin-VI OS=Homo sapiens OX=9606 GN=MYO6 PE=1 SV=4	Unconventional myosin-VI	MYO6	Sus scrofa	2	4	4	4	2	1	2	2	3	3	2	1	2	2	3	3	2	1	2	2	3	3	2022-07-05	2022-07-05	2022-07-05	144.86	1254	1254;1294	1992-03-01	2	1	2	2	3	3	0	23.847	By MS/MS	By matching	By MS/MS
Q16851	sp|Q16851|UGPA_HUMAN;sp|P79303|UGPA_PIG	sp|Q16851|UGPA_HUMAN;sp|P79303|UGPA_PIG	5;4	5;4	5;4	sp|Q16851|UGPA_HUMAN UTP--glucose-1-phosphate uridylyltransferase OS=Homo sapiens OX=9606 GN=UGP2 PE=1 SV=5;sp|P79303|UGPA_PIG UTP--glucose-1-phosphate uridylyltransferase OS=Sus scrofa OX=9823 GN=UGP2 PE=2 SV=3	UTP--glucose-1-phosphate uridylyltransferase	UGP2	Homo sapiens	2	5	5	5	2	3	4	3	4	5	2	3	4	3	4	5	2	3	4	3	4	5	15	15	15	56.94	508	508;508	2022-09-03	2	3	4	3	4	5	0	31.72	By MS/MS	By MS/MS	By MS/MS
P54727	sp|P54727|RD23B_HUMAN	sp|P54727|RD23B_HUMAN	1	1	1	sp|P54727|RD23B_HUMAN UV excision repair protein RAD23 homolog B OS=Homo sapiens OX=9606 GN=RAD23B PE=1 SV=1	UV excision repair protein RAD23 homolog B	RAD23B	Homo sapiens	1	1	1	1	1	1	1	1	1	1	1	1	1	1	1	1	1	1	1	1	1	1	2022-06-04	2022-06-04	2022-06-04	43.171	409	409	2022-05-03	1	1	1	1	1	1	0.0043057	67.302	By MS/MS	By MS/MS	By MS/MS
O75436	sp|O75436|VP26A_HUMAN	sp|O75436|VP26A_HUMAN	1	1	1	sp|O75436|VP26A_HUMAN Vacuolar protein sorting-associated protein 26A OS=Homo sapiens OX=9606 GN=VPS26A PE=1 SV=2	Vacuolar protein sorting-associated protein 26A	VPS26A	Homo sapiens	1	1	1	1	1	1	1	1	1	1	1	1	1	1	1	1	1	1	1	1	1	1	2022-05-05	2022-05-05	2022-05-05	38.169	327	327	2022-05-03	1	1	1	1	1	1	0.003352	7.137	By matching	By MS/MS	By MS/MS
Q4G0F5	sp|Q4G0F5|VP26B_HUMAN	sp|Q4G0F5|VP26B_HUMAN	1	1	1	sp|Q4G0F5|VP26B_HUMAN Vacuolar protein sorting-associated protein 26B OS=Homo sapiens OX=9606 GN=VPS26B PE=1 SV=2	Vacuolar protein sorting-associated protein 26B	VPS26B	Homo sapiens	1	1	1	1	1	1	1	1	1	0	1	1	1	1	1	0	1	1	1	1	1	0	2022-09-08	2022-09-08	2022-09-08	39.154	336	336	1978-02-01	2	2	2	2	1		0.0034443	74.104	By MS/MS	By MS/MS	By MS/MS
Q96QK1	sp|Q96QK1|VPS35_HUMAN	sp|Q96QK1|VPS35_HUMAN	9	9	9	sp|Q96QK1|VPS35_HUMAN Vacuolar protein sorting-associated protein 35 OS=Homo sapiens OX=9606 GN=VPS35 PE=1 SV=2	Vacuolar protein sorting-associated protein 35	VPS35	Homo sapiens	1	9	9	9	6	8	8	8	7	7	6	8	8	8	7	7	6	8	8	8	7	7	2022-03-16	2022-03-16	2022-03-16	91.706	796	796	1952-03-01	6	8	8	8	7	7	0	70.94	By MS/MS	By MS/MS	By MS/MS
Q9NP79	sp|Q9NP79|VTA1_HUMAN	sp|Q9NP79|VTA1_HUMAN	1	1	1	sp|Q9NP79|VTA1_HUMAN Vacuolar protein sorting-associated protein VTA1 homolog OS=Homo sapiens OX=9606 GN=VTA1 PE=1 SV=1	Vacuolar protein sorting-associated protein VTA1 homolog	VTA1	Homo sapiens	1	1	1	1	1	1	1	1	1	1	1	1	1	1	1	1	1	1	1	1	1	1	2022-05-06	2022-05-06	2022-05-06	33.879	307	307	2022-05-03	1	1	1	1	1	1	0.001287	11.205	By MS/MS	By matching	By MS/MS
P26640	sp|P26640|SYVC_HUMAN	sp|P26640|SYVC_HUMAN	1	1	1	sp|P26640|SYVC_HUMAN Valine--tRNA ligase OS=Homo sapiens OX=9606 GN=VARS1 PE=1 SV=4	Valine--tRNA ligase	VARS1	Homo sapiens	1	1	1	1	1	1	1	0	0	0	1	1	1	0	0	0	1	1	1	0	0	0	2022-03-01	2022-03-01	2022-03-01	140.47	1264	1264	2	1	1	1				0.0023866	80.669	By MS/MS	By MS/MS	By MS/MS
Q9P035	sp|Q9P035|HACD3_HUMAN	sp|Q9P035|HACD3_HUMAN	2	2	2	sp|Q9P035|HACD3_HUMAN Very-long-chain (3R)-3-hydroxyacyl-CoA dehydratase 3 OS=Homo sapiens OX=9606 GN=HACD3 PE=1 SV=2	Very-long-chain (3R)-3-hydroxyacyl-CoA dehydratase 3	HACD3	Homo sapiens	1	2	2	2	2	2	2	2	2	2	2	2	2	2	2	2	2	2	2	2	2	2	2022-09-11	2022-09-11	2022-09-11	43.159	362	362	1969-03-01	2	2	2	2	2	3	0	14.55	By MS/MS	By MS/MS	By MS/MS
Q9NZ01	sp|Q9NZ01|TECR_HUMAN	sp|Q9NZ01|TECR_HUMAN	2	2	2	sp|Q9NZ01|TECR_HUMAN Very-long-chain enoyl-CoA reductase OS=Homo sapiens OX=9606 GN=TECR PE=1 SV=1	Very-long-chain enoyl-CoA reductase	TECR	Homo sapiens	1	2	2	2	2	2	2	2	2	2	2	2	2	2	2	2	2	2	2	2	2	2	2022-01-07	2022-01-07	2022-01-07	36.034	308	308	2022-05-03	2	2	2	2	2	2	0	13.384	By MS/MS	By MS/MS	By MS/MS
P63027	sp|P63027|VAMP2_HUMAN;sp|Q15836|VAMP3_HUMAN	sp|P63027|VAMP2_HUMAN	3;1	3;1	3;1	sp|P63027|VAMP2_HUMAN Vesicle-associated membrane protein 2 OS=Homo sapiens OX=9606 GN=VAMP2 PE=1 SV=3	Vesicle-associated membrane protein 2	VAMP2	Homo sapiens	2	3	3	3	3	3	3	3	3	3	3	3	3	3	3	3	3	3	3	3	3	3	53.4	53.4	53.4	12.663	116	116;100	1949-03-01	6	6	6	5	6	6	0	323.31	By MS/MS	By MS/MS	By MS/MS
Q9P0L0	sp|Q9P0L0|VAPA_HUMAN	sp|Q9P0L0|VAPA_HUMAN	3	2	2	sp|Q9P0L0|VAPA_HUMAN Vesicle-associated membrane protein-associated protein A OS=Homo sapiens OX=9606 GN=VAPA PE=1 SV=3	Vesicle-associated membrane protein-associated protein A	VAPA	Homo sapiens	1	3	2	2	3	3	3	3	3	2	2	2	2	2	2	1	2	2	2	2	2	1	2022-01-14	2022-02-09	2022-02-09	27.893	249	249	2027-03-01	2	2	2	2	2	1	0	13.335	By MS/MS	By MS/MS	By MS/MS
A5GFS8	sp|A5GFS8|VAPB_PIG;sp|O95292|VAPB_HUMAN	sp|A5GFS8|VAPB_PIG;sp|O95292|VAPB_HUMAN	3;2	3;2	2;1	sp|A5GFS8|VAPB_PIG Vesicle-associated membrane protein-associated protein B OS=Sus scrofa OX=9823 GN=VAPB PE=3 SV=1;sp|O95292|VAPB_HUMAN Vesicle-associated membrane protein-associated protein B/C OS=Homo sapiens OX=9606 GN=VAPB PE=1 SV=3	Vesicle-associated membrane protein-associated protein B	VAPB	Sus scrofa	2	3	3	2	3	3	3	3	3	3	3	3	3	3	3	3	2	2	2	2	2	2	16	16	2022-01-11	27.053	243	243;243	2022-07-03	3	3	3	3	4	4	0	50.368	By MS/MS	By MS/MS	By MS/MS
P46459	sp|P46459|NSF_HUMAN	sp|P46459|NSF_HUMAN	10	10	10	sp|P46459|NSF_HUMAN Vesicle-fusing ATPase OS=Homo sapiens OX=9606 GN=NSF PE=1 SV=3	Vesicle-fusing ATPase	NSF	Homo sapiens	1	10	10	10	9	9	9	9	9	9	9	9	9	9	9	9	9	9	9	9	9	9	2022-07-18	2022-07-18	2022-07-18	82.593	744	744	1951-03-01	10	10	10	11	10	10	0	67.731	By MS/MS	By MS/MS	By MS/MS
O75396	sp|O75396|SC22B_HUMAN	sp|O75396|SC22B_HUMAN	4	4	4	sp|O75396|SC22B_HUMAN Vesicle-trafficking protein SEC22b OS=Homo sapiens OX=9606 GN=SEC22B PE=1 SV=4	Vesicle-trafficking protein SEC22b	SEC22B	Homo sapiens	1	4	4	4	4	4	4	4	4	4	4	4	4	4	4	4	4	4	4	4	4	4	2022-06-25	2022-06-25	2022-06-25	24.593	215	215	2022-05-03	4	4	4	4	4	4	0	60.01	By MS/MS	By MS/MS	By MS/MS
Q9P2U7	sp|Q9P2U7|VGLU1_HUMAN	sp|Q9P2U7|VGLU1_HUMAN	2	2	2	sp|Q9P2U7|VGLU1_HUMAN Vesicular glutamate transporter 1 OS=Homo sapiens OX=9606 GN=SLC17A7 PE=2 SV=1	Vesicular glutamate transporter 1	SLC17A7	Homo sapiens	1	2	2	2	2	2	2	2	2	2	2	2	2	2	2	2	2	2	2	2	2	2	2022-07-05	2022-07-05	2022-07-05	61.613	560	560	2022-05-03	2	2	2	2	2	2	0	11.779	By MS/MS	By MS/MS	By MS/MS
P02543	sp|P02543|VIME_PIG;sp|P08670|VIME_HUMAN;sp|P41219|PERI_HUMAN;sp|Q9NSB2|KRT84_HUMAN;CON__Q6ISB0;CON__Q9NSB2;CON__Q9DCV7;sp|P02540|DESM_PIG;CON__P08729;CON__Q3KNV1;sp|P08729|K2C7_HUMAN;sp|P17661|DESM_HUMAN;CON__P05787;sp|P05787|K2C8_HUMAN;sp|Q8N1N4|K2C78_HUMAN;CON__P78386;CON__Q8N1N4-2;sp|P78386|KRT85_HUMAN;CON__P07744;CON__Q14533;sp|Q14533|KRT81_HUMAN;CON__H-INV:HIT000292931;CON__Q6NT21;sp|P12035|…	sp|P02543|VIME_PIG;sp|P08670|VIME_HUMAN	25;18;3;2;2;2;2;2;2;2;2;2;2;2;1;1;1;1;1;1;1;1;1;1;1;1;1;1;1;1;1;1;1;1	25;18;3;2;2;2;2;2;2;2;2;2;2;2;1;1;1;1;1;1;1;1;1;1;1;1;1;1;1;1;1;1;1;1	24;17;3;1;1;1;1;2;1;1;1;2;1;1;0;0;0;0;0;0;0;0;0;0;0;0;1;0;0;0;0;0;0;0	sp|P02543|VIME_PIG Vimentin OS=Sus scrofa OX=9823 GN=VIM PE=1 SV=2;sp|P08670|VIME_HUMAN Vimentin OS=Homo sapiens OX=9606 GN=VIM PE=1 SV=4	Vimentin	VIM	Sus scrofa	34	25	25	24	24	25	24	21	24	24	24	25	24	21	24	24	24	24	23	21	24	24	60.1	60.1	58.6	53.667	466	466;466;470;600;600;600;457;471;469;469;469;470;483;483;520;507;521;507;525;505;505;443;493;628;629;638;499;493;521;479;486;486;493;638	1952-03-01	42	43	45	42	44	44	0	323.31	By MS/MS	By MS/MS	By MS/MS
P18206	sp|P18206|VINC_HUMAN;sp|P26234|VINC_PIG	sp|P18206|VINC_HUMAN;sp|P26234|VINC_PIG	2;2	2;2	2;2	sp|P18206|VINC_HUMAN Vinculin OS=Homo sapiens OX=9606 GN=VCL PE=1 SV=4;sp|P26234|VINC_PIG Vinculin OS=Sus scrofa OX=9823 GN=VCL PE=1 SV=4	Vinculin	VCL	Homo sapiens	2	2	2	2	2	1	2	2	2	2	2	1	2	2	2	2	2	1	2	2	2	2	2022-03-03	2022-03-03	2022-03-03	123.8	1134	1134;1135	1964-03-01	2	1	2	2	2	2	0	12.935	By MS/MS	By MS/MS	By MS/MS
P62760	sp|P62760|VISL1_HUMAN	sp|P62760|VISL1_HUMAN	2	2	2	sp|P62760|VISL1_HUMAN Visinin-like protein 1 OS=Homo sapiens OX=9606 GN=VSNL1 PE=1 SV=2	Visinin-like protein 1	VSNL1	Homo sapiens	1	2	2	2	2	2	2	2	2	2	2	2	2	2	2	2	2	2	2	2	2	2	2022-06-12	2022-06-12	2022-06-12	22.142	191	191	2022-05-03	2	2	2	2	2	2	0	38.745	By MS/MS	By MS/MS	By MS/MS
Q9MZ16	sp|Q9MZ16|VDAC1_PIG;sp|P21796|VDAC1_HUMAN	sp|Q9MZ16|VDAC1_PIG;sp|P21796|VDAC1_HUMAN	8;8	8;8	8;8	sp|Q9MZ16|VDAC1_PIG Voltage-dependent anion-selective channel protein 1 OS=Sus scrofa OX=9823 GN=VDAC1 PE=2 SV=3;sp|P21796|VDAC1_HUMAN Voltage-dependent anion-selective channel protein 1 OS=Homo sapiens OX=9606 GN=VDAC1 PE=1 SV=2	Voltage-dependent anion-selective channel protein 1	VDAC1	Sus scrofa	2	8	8	8	8	7	8	8	8	7	8	7	8	8	8	7	8	7	8	8	8	7	45.2	45.2	45.2	30.726	283	283;283	1953-03-01	9	8	9	9	9	9	0	58.519	By MS/MS	By MS/MS	By MS/MS
Q9MZ15	sp|Q9MZ15|VDAC2_PIG;sp|P45880|VDAC2_HUMAN	sp|Q9MZ15|VDAC2_PIG;sp|P45880|VDAC2_HUMAN	5;5	5;5	5;5	sp|Q9MZ15|VDAC2_PIG Voltage-dependent anion-selective channel protein 2 OS=Sus scrofa OX=9823 GN=VDAC2 PE=2 SV=1;sp|P45880|VDAC2_HUMAN Voltage-dependent anion-selective channel protein 2 OS=Homo sapiens OX=9606 GN=VDAC2 PE=1 SV=2	Voltage-dependent anion-selective channel protein 2	VDAC2	Sus scrofa	2	5	5	5	4	4	4	4	4	5	4	4	4	4	4	5	4	4	4	4	4	5	2022-09-28	2022-09-28	2022-09-28	31.592	294	294;294	1945-03-01	5	5	5	5	4	5	0	31.824	By MS/MS	By MS/MS	By MS/MS
Q9NY47	sp|Q9NY47|CA2D2_HUMAN;sp|P54289|CA2D1_HUMAN	sp|Q9NY47|CA2D2_HUMAN	3;1	3;1	3;1	sp|Q9NY47|CA2D2_HUMAN Voltage-dependent calcium channel subunit alpha-2/delta-2 OS=Homo sapiens OX=9606 GN=CACNA2D2 PE=1 SV=2	Voltage-dependent calcium channel subunit alpha-2/delta-2	CACNA2D2	Homo sapiens	2	3	3	3	3	3	2	2	2	2	3	3	2	2	2	2	3	3	2	2	2	2	2022-03-04	2022-03-04	2022-03-04	129.82	1150	1150;1103	2021-03-01	3	3	2	2	2	2	0	19.868	By MS/MS	By MS/MS	By MS/MS
Q93050	sp|Q93050|VPP1_HUMAN	sp|Q93050|VPP1_HUMAN	8	8	8	sp|Q93050|VPP1_HUMAN V-type proton ATPase 116 kDa subunit a1 OS=Homo sapiens OX=9606 GN=ATP6V0A1 PE=1 SV=3	V-type proton ATPase 116 kDa subunit a1	ATP6V0A1	Homo sapiens	1	8	8	8	8	8	8	8	8	8	8	8	8	8	8	8	8	8	8	8	8	8	2022-04-13	2022-04-13	2022-04-13	96.412	837	837	2022-05-03	8	8	8	8	8	8	0	49.636	By MS/MS	By MS/MS	By MS/MS
Q29048	sp|Q29048|VATA_PIG;sp|P38606|VATA_HUMAN	sp|Q29048|VATA_PIG;sp|P38606|VATA_HUMAN	16;15	16;15	16;15	sp|Q29048|VATA_PIG V-type proton ATPase catalytic subunit A OS=Sus scrofa OX=9823 GN=ATP6V1A PE=2 SV=2;sp|P38606|VATA_HUMAN V-type proton ATPase catalytic subunit A OS=Homo sapiens OX=9606 GN=ATP6V1A PE=1 SV=2	V-type proton ATPase catalytic subunit A	ATP6V1A	Sus scrofa	2	16	16	16	15	15	16	16	15	15	15	15	16	16	15	15	15	15	16	16	15	15	38.4	38.4	38.4	68.317	617	617;617	1951-03-01	19	19	20	23	19	19	0	323.31	By MS/MS	By MS/MS	By MS/MS
P21281	sp|P21281|VATB2_HUMAN;sp|P15313|VATB1_HUMAN	sp|P21281|VATB2_HUMAN	12;5	12;5	12;5	sp|P21281|VATB2_HUMAN V-type proton ATPase subunit B, brain isoform OS=Homo sapiens OX=9606 GN=ATP6V1B2 PE=1 SV=3	V-type proton ATPase subunit B, brain isoform	ATP6V1B2	Homo sapiens	2	12	12	12	12	12	12	11	11	11	12	12	12	11	11	11	12	12	12	11	11	11	32.5	32.5	32.5	56.5	511	511;513	1944-03-01	15	15	15	13	14	14	0	220.58	By MS/MS	By MS/MS	By MS/MS
P21283	sp|P21283|VATC1_HUMAN	sp|P21283|VATC1_HUMAN	4	4	4	sp|P21283|VATC1_HUMAN V-type proton ATPase subunit C 1 OS=Homo sapiens OX=9606 GN=ATP6V1C1 PE=1 SV=4	V-type proton ATPase subunit C 1	ATP6V1C1	Homo sapiens	1	4	4	4	3	4	4	4	3	4	3	4	4	4	3	4	3	4	4	4	3	4	2022-09-14	2022-09-14	2022-09-14	43.941	382	382	1957-03-01	3	4	4	5	3	4	0	53.983	By MS/MS	By MS/MS	By MS/MS
Q9Y5K8	sp|Q9Y5K8|VATD_HUMAN	sp|Q9Y5K8|VATD_HUMAN	4	4	4	sp|Q9Y5K8|VATD_HUMAN V-type proton ATPase subunit D OS=Homo sapiens OX=9606 GN=ATP6V1D PE=1 SV=1	V-type proton ATPase subunit D	ATP6V1D	Homo sapiens	1	4	4	4	3	3	2	2	3	4	3	3	2	2	3	4	3	3	2	2	3	4	2022-01-27	2022-01-27	2022-01-27	28.262	247	247	1965-03-01	3	3	2	2	3	4	0	76.933	By MS/MS	By MS/MS	By MS/MS
P61421	sp|P61421|VA0D1_HUMAN	sp|P61421|VA0D1_HUMAN	4	4	4	sp|P61421|VA0D1_HUMAN V-type proton ATPase subunit d 1 OS=Homo sapiens OX=9606 GN=ATP6V0D1 PE=1 SV=1	V-type proton ATPase subunit d 1	ATP6V0D1	Homo sapiens	1	4	4	4	3	3	4	4	3	3	3	3	4	4	3	3	3	3	4	4	3	3	2022-01-21	2022-01-21	2022-01-21	40.329	351	351	2022-05-03	4	4	5	5	4	4	0	28.825	By MS/MS	By MS/MS	By MS/MS
Q8N8Y2	sp|Q8N8Y2|VA0D2_HUMAN	sp|Q8N8Y2|VA0D2_HUMAN	1	1	1	sp|Q8N8Y2|VA0D2_HUMAN V-type proton ATPase subunit d 2 OS=Homo sapiens OX=9606 GN=ATP6V0D2 PE=1 SV=1	V-type proton ATPase subunit d 2	ATP6V0D2	Homo sapiens	1	1	1	1	1	1	0	1	1	1	1	1	0	1	1	1	1	1	0	1	1	1	2022-03-04	2022-03-04	2022-03-04	40.426	350	350	2022-06-03	1	1		1	1	1	0.0033557	71.558	By MS/MS	By MS/MS
P36543	sp|P36543|VATE1_HUMAN;sp|Q96A05|VATE2_HUMAN	sp|P36543|VATE1_HUMAN	4;1	4;1	4;1	sp|P36543|VATE1_HUMAN V-type proton ATPase subunit E 1 OS=Homo sapiens OX=9606 GN=ATP6V1E1 PE=1 SV=1	V-type proton ATPase subunit E 1	ATP6V1E1	Homo sapiens	2	4	4	4	4	4	4	3	4	4	4	4	4	3	4	4	4	4	4	3	4	4	2022-09-19	2022-09-19	2022-09-19	26.145	226	226;226	1943-03-01	5	5	4	5	5	4	0	39.515	By MS/MS	By MS/MS	By MS/MS
Q16864	sp|Q16864|VATF_HUMAN	sp|Q16864|VATF_HUMAN	1	1	1	sp|Q16864|VATF_HUMAN V-type proton ATPase subunit F OS=Homo sapiens OX=9606 GN=ATP6V1F PE=1 SV=2	V-type proton ATPase subunit F	ATP6V1F	Homo sapiens	1	1	1	1	1	1	1	1	1	1	1	1	1	1	1	1	1	1	1	1	1	1	2022-01-10	2022-01-10	2022-01-10	13.37	119	119	2022-05-03	1	1	1	1	1	1	0.0024331	84.617	By MS/MS	By MS/MS	By MS/MS
Q9TSV6	sp|Q9TSV6|VATG2_PIG;sp|O95670|VATG2_HUMAN	sp|Q9TSV6|VATG2_PIG;sp|O95670|VATG2_HUMAN	2;2	2;2	2;2	sp|Q9TSV6|VATG2_PIG V-type proton ATPase subunit G 2 OS=Sus scrofa OX=9823 GN=ATP6V1G2 PE=3 SV=1;sp|O95670|VATG2_HUMAN V-type proton ATPase subunit G 2 OS=Homo sapiens OX=9606 GN=ATP6V1G2 PE=1 SV=1	V-type proton ATPase subunit G 2	ATP6V1G2	Sus scrofa	2	2	2	2	2	2	2	2	2	2	2	2	2	2	2	2	2	2	2	2	2	2	2022-03-26	2022-03-26	2022-03-26	13.579	118	118;118	2022-05-03	2	2	2	2	2	2	0	29.327	By MS/MS	By MS/MS	By MS/MS
Q9TVC1	sp|Q9TVC1|VATH_PIG;sp|Q9UI12|VATH_HUMAN	sp|Q9TVC1|VATH_PIG;sp|Q9UI12|VATH_HUMAN	8;7	8;7	8;7	sp|Q9TVC1|VATH_PIG V-type proton ATPase subunit H OS=Sus scrofa OX=9823 GN=ATP6V1H PE=2 SV=1;sp|Q9UI12|VATH_HUMAN V-type proton ATPase subunit H OS=Homo sapiens OX=9606 GN=ATP6V1H PE=1 SV=1	V-type proton ATPase subunit H	ATP6V1H	Sus scrofa	2	8	8	8	7	7	8	8	8	8	7	7	8	8	8	8	7	7	8	8	8	8	2022-06-23	2022-06-23	2022-06-23	55.849	483	483;483	1955-03-01	7	8	8	8	8	8	0	179.02	By MS/MS	By MS/MS	By MS/MS
O75083	sp|O75083|WDR1_HUMAN	sp|O75083|WDR1_HUMAN	8	8	8	sp|O75083|WDR1_HUMAN WD repeat-containing protein 1 OS=Homo sapiens OX=9606 GN=WDR1 PE=1 SV=4	WD repeat-containing protein 1	WDR1	Homo sapiens	1	8	8	8	6	8	7	7	6	7	6	8	7	7	6	7	6	8	7	7	6	7	2022-04-28	2022-04-28	2022-04-28	66.193	606	606	1956-03-01	7	10	11	11	9	9	0	77.643	By MS/MS	By MS/MS	By MS/MS
Q9NQW7	sp|Q9NQW7|XPP1_HUMAN	sp|Q9NQW7|XPP1_HUMAN	2	2	2	sp|Q9NQW7|XPP1_HUMAN Xaa-Pro aminopeptidase 1 OS=Homo sapiens OX=9606 GN=XPNPEP1 PE=1 SV=3	Xaa-Pro aminopeptidase 1	XPNPEP1	Homo sapiens	1	2	2	2	2	2	1	1	1	1	2	2	1	1	1	1	2	2	1	1	1	1	8	8	8	69.917	623	623	3	2	2	1	1	1	1	0	1941-12-01	By MS/MS	By MS/MS	By MS/MS
P67809	sp|P67809|YBOX1_HUMAN;sp|Q9Y2T7|YBOX2_HUMAN	sp|P67809|YBOX1_HUMAN	6;1	6;1	5;0	sp|P67809|YBOX1_HUMAN Y-box-binding protein 1 OS=Homo sapiens OX=9606 GN=YBX1 PE=1 SV=3	Y-box-binding protein 1	YBX1	Homo sapiens	2	6	6	5	6	6	5	4	3	4	6	6	5	4	3	4	5	5	4	3	2	3	35.5	35.5	30.2	35.924	324	324;364	2014-03-01	6	6	5	4	3	4	0	140.76	By MS/MS	By MS/MS	By MS/MS
P16989	sp|P16989|YBOX3_HUMAN	sp|P16989|YBOX3_HUMAN	2	1	1	sp|P16989|YBOX3_HUMAN Y-box-binding protein 3 OS=Homo sapiens OX=9606 GN=YBX3 PE=1 SV=4	Y-box-binding protein 3	YBX3	Homo sapiens	1	2	1	1	2	2	2	2	2	2	1	1	1	1	1	1	1	1	1	1	1	1	2022-07-09	2022-01-05	2022-01-05	40.089	372	372	2022-05-03	1	1	1	1	1	1	0	11.965	By MS/MS	By MS/MS	By MS/MS
[truncated: 50 more columns]

## Sheet: Significant changed proteins
Major protein ID	Protein name	Gene name	Student's T-test p-value	log2 fold change	CTRL vs. CDR2	LFQ intensity CTRL_R1	LFQ intensity CTRL_R2	LFQ intensity CTRL_R3	LFQ intensity_CDR2_R1	LFQ intensity_CDR2_R2	LFQ intensity_CDR2_R3	Student's T-test Significant	Peptides	Razor + unique peptides	Unique peptides	Mol. weight [kDa]	Q-value	Score	Intensity	iBAQ peptides	MS/MS count
P51648	Aldehyde dehydrogenase family 3 member A2	ALDH3A2	7.6055e-05	3.60786	↑	21.8615	21.9589	22.5482	18.5712	18.4695	18.5043	+	2	2	2	54,847	0	12,395	28215000	23	8
O94760	N(G),N(G)-dimethylarginine dimethylaminohydrolase 1	DDAH1	0.000558193	2.82115	↑	21.053	21.9943	21.6567	18.7657	18.8388	18.6362	+	2	2	2	31,121	0	12,049	26140000	19	6
Q07666	KH domain-containing, RNA-binding, signal transduction-associated protein 1	KHDRBS1	0.00919738	2.39453	↑	21.094	21.354	21.1125	18.0563	18.5721	19.7485	+	1	1	1	48,227	0,0023202	76,172	18460000	21	9
P41091	Eukaryotic translation initiation factor 2 subunit 3	EIF2S3	0.0285639	1.85446	↑	20.2314	20.333	20.7056	19.3714	17.5562	18.7791	+	2	2	2	51,109	0	12,825	11791000	25	3
P09497	Clathrin light chain B	CLTB	0.016237	1.54585	↑	20.297	21.0303	20.5488	19.7092	18.6478	18.8816	+	2	2	2	25,19	0	17,071	10195000	10	10
P49588	Alanine--tRNA ligase, cytoplasmic	AARS1	0.0286173	1.41689	↑	20.5271	19.3318	19.6651	17.9747	18.5778	18.7208	+	3	3	3	106,81	0	NaN	8281700	58	7
P51665	26S proteasome non-ATPase regulatory subunit 7	PSMD7	0.0121085	1.34701	↑	20.0443	20.1195	20.2507	18.2738	18.7754	19.3243	+	3	3	3	37,025	0	17,613	8751900	15	4
P81693	Low molecular weight phosphotyrosine protein phosphatase	ACP1	0.0488667	1.29641	↑	20.4491	20.2917	21.1126	19.6915	19.7288	18.5438	+	2	2	2	18,035	0	NaN	11359000	9	9
P53396	ATP-citrate synthase	ACLY	0.0417202	1.14961	↑	19.4665	19.3883	19.9395	19.1164	17.9407	18.2883	+	2	2	2	120,84	0	12,655	6167500	64	2
O00429	Dynamin-1-like protein	DNM1L	0.0455595	1.08057	↑	20.0262	19.9722	20.1132	18.7643	18.4259	19.6798	+	3	3	3	81,876	0	20,604	10344000	53	9
P15531	Nucleoside diphosphate kinase A	NME1	0.038159	1.03469	↑	25.9137	24.9719	24.989	23.9956	24.4543	24.3207	+	4	4	2	17,149	0	88,236	468520000	12	34
P30040	Endoplasmic reticulum resident protein 29	ERP29	0.046726	0.9265	↑	21.6953	21.4838	20.7776	20.1422	20.7193	20.3157	+	3	3	3	28,993	0	40,006	24894000	15	11
Q6PLK3	Amine oxidase [flavin-containing] B	MAOB	0.0241035	0.912911	↑	20.1001	19.4971	19.8728	19.1922	18.5511	18.9879	+	2	2	2	58,265	0	13,684	6904800	34	5
A7TX81	COP9 signalosome complex subunit 6	COPS6	0.0114654	0.800074	↑	19.5513	19.8525	19.3344	18.9277	18.5873	18.823	+	3	3	3	35,865	0	17,043	10258000	14	4
Q9ULP0	Protein NDRG4	NDRG4	0.0024829	0.740131	↑	20.7523	21.0045	20.6553	20.0081	20.0597	20.1239	+	2	2	2	38,458	0	13,428	14834000	17	8
P30049	ATP synthase subunit delta, mitochondrial	ATP5F1D	0.0306049	0.681978	↑	23.9106	23.4893	23.9055	22.8031	23.1218	23.3346	+	2	2	2	17,49	0	32,065	133540000	6	18
Q03013	Glutathione S-transferase Mu 4	GSTM4	0.0112121	0.659511	↑	21.8554	21.748	22.1297	21.3668	21.3244	21.0633	+	2	2	2	25,561	0	52,729	34102000	17	9
O75396	Vesicle-trafficking protein SEC22b	SEC22B	0.0199592	0.615844	↑	21.2661	20.7676	20.8007	20.3852	20.2713	20.3304	+	4	4	4	24,593	0	60,01	28693000	15	19
P09471	Guanine nucleotide-binding protein G(o) subunit alpha	GNAO1	0.0312709	0.607337	↑	24.2071	24.085	24.5175	23.5601	23.9304	23.497	+	7	5	5	40,05	0	271,09	197360000	18	44
P13618	ATP synthase-coupling factor 6, mitochondrial	ATP5PF	0.00265379	0.579928	↑	22.3172	22.4383	22.4128	21.7607	21.9641	21.7038	+	4	4	4	89,299	0	48,919	61969000	4	23
P04181	Ornithine aminotransferase, mitochondrial	OAT	0.0250952	0.507154	↑	21.3073	20.9264	20.9809	20.7186	20.4321	20.5426	+	2	2	2	48,534	0	41,708	18584000	28	7
P40227	T-complex protein 1 subunit zeta	CCT6A	0.028259	0.484238	↑	22.2177	22.6484	22.4124	22.0754	21.8264	21.9239	+	5	5	5	58,024	0	162,99	75998000	28	32
P78371	T-complex protein 1 subunit beta	CCT2	0.00142253	0.286668	↑	23.7423	23.7023	23.7085	23.4224	23.3764	23.4944	+	13	13	13	57,488	0	127,94	222140000	36	69
Q13432	Protein unc-119 homolog A	UNC119	0.00944122	0.23628	↑	21.7007	21.8535	21.7675	21.5363	21.4962	21.5804	+	4	4	4	26,962	0	46,228	36399000	14	22
P55072	Transitional endoplasmic reticulum ATPase	VCP	0.0370428	0.183721	↑	23.777	23.9276	23.7439	23.6146	23.6708	23.6119	+	19	19	1	89,321	0	323,31	316830000	48	99
P19620	Annexin A2	ANXA2	0.0166778	-0.200651	↓	21.2182	21.1941	21.2532	21.5178	21.3724	21.3773	+	9	9	9	38,422	0	65,401	56973000	25	34
P06576	ATP synthase subunit beta, mitochondrial	ATP5F1B	0.0423091	-0.246241	↓	25.0391	25.1065	24.9253	25.1508	25.2849	25.374	+	18	18	18	56,559	0	323,31	1724300000	30	268
Q6DUB7	Stathmin	STMN1	0.0352966	-0.33346	↓	20.3669	20.2884	20.2588	20.8415	20.5375	20.5354	+	2	2	2	17,302	0	11,767	15362000	10	6
P24540	Acylphosphatase-1	ACYP1	0.0257109	-0.379384	↓	20.7765	20.8167	20.8155	21.2533	21.3247	20.9688	+	2	2	2	11,427	0	15,214	20361000	7	7
P51991	Heterogeneous nuclear ribonucleoprotein A3	HNRNPA3	0.00833644	-0.40012	↓	20.3064	20.3567	20.4044	20.8474	20.6019	20.8185	+	4	4	4	39,594	0	44,693	24483000	20	12
P36873	Serine/threonine-protein phosphatase PP1-gamma catalytic subunit	PPP1CC	0.0210296	-0.45373	↓	21.1838	20.9436	20.9098	21.6404	21.3625	21.3955	+	7	7	2	36,983	0	50,181	57453000	18	33
Q9Y333	U6 snRNA-associated Sm-like protein LSm2	LSM2	0.0405761	-0.455545	↓	19.735	20.0772	19.757	20.302	20.1348	20.499	+	2	2	2	10,834	0	15,37	11599000	7	14
P50667	Cytochrome c oxidase subunit 2	MT-CO2	0.00316247	-0.544413	↓	20.2148	19.9717	20.0329	20.5344	20.6895	20.6287	+	2	2	2	26,184	0	13,315	13595000	8	12
Q9NZ01	Very-long-chain enoyl-CoA reductase	TECR	0.00495141	-0.584734	↓	19.8724	19.7639	19.9735	20.5624	20.2874	20.5141	+	2	2	2	36,034	0	13,384	11970000	16	9
P08574	Cytochrome c1, heme protein, mitochondrial	CYC1	0.0160949	-0.850616	↓	19.6033	19.5316	19.8938	20.8599	20.2358	20.4848	+	2	2	2	35,422	0	12,988	10989000	18	7
P62197	26S proteasome regulatory subunit 8	PSMC5	0.00151972	-1.00012	↓	19.8429	19.7755	20.1502	20.9923	20.8051	20.9715	+	4	4	4	45,626	0	26,335	16859000	28	13
Q04967	Heat shock 70 kDa protein 6	HSPA6	0.0222024	-1.0286	↓	24.8212	25.068	25.1796	26.3956	25.5349	26.2241	+	6	1	0	71,108	0	35,285	345520000	38	11
O00299	Chloride intracellular channel protein 1	CLIC1	0.000866936	-2.27444	↓	18.6425	18.2499	18.9532	21.182	20.6661	20.8207	+	2	2	2	26,922	0	11,863	15108000	17	3
Q99880	Histone H2B type 1-L	HIST1H2BL	0.0235734	-4.5168	↓	17.8954	18.408	20.7816	23.1279	22.2287	25.2788	+	2	2	2	13,952	0	78,415	72614000	11	12
